# Supplementary material for: Patterns and Drivers of Scattered Tree Loss in Agricultural Landscapes: Orchard Meadows in Germany (1968-2009)
Source: PLoS One. 2015 May 1;10(5):e0126178. doi: 10.1371/journal.pone.0126178 (PMC4416762; doi:10.1371/journal.pone.0126178)
Supplement: S1 Table — (XLSX) [file pone.0126178.s001.xlsx]

## Sheet: point level
ObjectID	X_COORD	Y_COORD	Municipality	Loss	Slope	Soil quality	Change in no. of full-time farms	Change in no. of part-time farms	Change in no. of horticultural farms	change in no. of livestock farms	Parcel size	Size of orchard meadow plot	Perimeter-area ratio of orchard meadow plot	Population change	Change in no. of residential buildings	Share of people ≥ 65 years among population	Change in settlement and traffic area	Distance to urban settlements	Distance to main roads	Distance to secondary roads	Situated within nature reserves	Situated within protected landscape
1	3.55814e+06	5.38955e+06	Kuchen	1	10.6469	3	0.333333	1	0	0.6	11514.3	1.18824e+06	0.0115027	1.02878	1.52941	0.11358	1.13072	252.686	215.232	82.7647	0	0
2	3.54647e+06	5.39332e+06	Göppingen	0	9.47078	3	0.245902	0.57377	0.315789	0.36875	11067.2	103615	0.0409819	1.02208	1.4472	0.138668	1.15129	299.666	593.57	296.184	0	0
3	3.5348e+06	5.39275e+06	Notzingen	0	8.27596	3	0.2	0.16	0	0.181818	952.2	54691.1	0.0283602	1.58633	2.37363	0.106287	1.20792	49.2443	166.208	85.44	0	0
4	3.53276e+06	5.38635e+06	Dettingen unter Teck	0	5.40456	3	0.2	0.049296	0	0.107692	863.2	1.70997e+06	0.00989906	1.37194	1.76895	0.12934	1.03196	304.015	847.718	105.475	0	0
5	3.53199e+06	5.38599e+06	Dettingen unter Teck	0	6.8752	3	0.2	0.049296	0	0.107692	748.3	1.70997e+06	0.00989906	1.37194	1.76895	0.12934	1.03196	1027.39	1519.68	102.591	0	0
6	3.50485e+06	5.36703e+06	Dußlingen	0	6.28689	3	0.2	0.128205	0	0.090909	1704.8	109804	0.0246954	1.22642	1.77338	0.102978	0.989209	380.296	492.367	206.155	0	0
7	3.52092e+06	5.38121e+06	Bempflingen	0	6.90446	3	0.333333	0.363636	1	0.272727	1189	257751	0.0186256	1.26159	1.79849	0.0983425	1.38889	111.803	145.344	98.6154	0	0
8	3.55763e+06	5.39253e+06	Süßen	0	15.3293	3	0.166667	0.428571	0.333333	0.243243	3720.5	35476.1	0.0367002	1.2209	1.69688	0.108562	1.57604	205.548	803.757	151.822	0	0
9	3.51286e+06	5.37147e+06	Reutlingen	0	5.51758	3	0.21978	0.19774	0.205882	0.215686	1505.4	85154.8	0.0264718	1.23563	1.5396	0.120979	1.29265	707.99	783.342	323.806	0	0
10	3.51326e+06	5.37229e+06	Reutlingen	0	2.87709	3	0.21978	0.19774	0.205882	0.215686	2105.9	597842	0.0117804	1.23563	1.5396	0.120979	1.29265	241.35	588.6	60	0	0
11	3.53266e+06	5.38411e+06	Owen	0	19.622	3	0.133333	0.47619	1	0.354167	760.2	1.39443e+06	0.0107842	1.31243	1.74632	0.117756	1.05	150.748	535	87.4643	0	0
12	3.50621e+06	5.36207e+06	Mössingen	0	11.8423	3	0.304348	0.11465	0	0.151316	24284.9	1.71355e+06	0.0133141	1.60177	2.13591	0.0976952	1.05316	1319.19	603.013	199.06	0	1
13	3.53918e+06	5.38971e+06	Ohmden	1	5.06404	2	0.5	0.103448	0	0.148148	1416.1	464865	0.0102856	1.41308	2.06513	0.102155	1.23529	15	335.336	14.1421	0	0
14	3.52256e+06	5.3817e+06	Grafenberg	0	10.1256	3	0	0.277778	0	0.235294	1313.1	154834	0.0158321	1.70392	2.09511	0.0979192	1.56897	106.066	618.809	149.164	0	0
15	3.51524e+06	5.36891e+06	Pfullingen	0	16.0607	4	0.363636	0.576923	0.285714	0.567568	886.4	349775	0.0184245	1.16265	1.70163	0.117938	1.10118	246.272	465.296	35.3553	0	0
16	3.53675e+06	5.38989e+06	Kirchheim unter Teck	1	3.31391	3	0.181818	0.241379	0.181818	0.245098	2427.2	329072	0.0147349	1.22208	1.69769	0.119627	1.30893	635.295	109.202	96.1769	1	0
17	3.55466e+06	5.3938e+06	Süßen	1	0.496646	0	0.166667	0.428571	0.333333	0.243243	7443.4	21081.4	0.0411234	1.2209	1.69688	0.108562	1.57604	0	300.167	93.9415	0	0
18	3.54921e+06	5.39424e+06	Heiningen	0	7.90091	3	0.185185	0.526316	1	0.348837	42739.6	29286.7	0.0307202	1.53551	2.04153	0.103488	1.07647	304.179	98.4886	98.4886	0	0
19	3.51286e+06	5.37767e+06	Kirchentellinsfurt	0	5.28466	3	0	0	0	0	905.8	1424.15	0.152912	1.28644	1.87016	0.107269	1.17308	272.443	328.938	78.1025	0	0
20	3.4978e+06	5.35994e+06	Hechingen	0	12.0287	0	0.236842	0.175	0	0.220126	3772.5	52732.1	0.0226436	1.18938	1.61633	0.133193	1.31471	120.104	380.296	137.568	0	0
21	3.52795e+06	5.38049e+06	Neuffen	0	6.92012	3	0.333333	0.326531	0.333333	0.222222	1045.8	328248	0.0129061	1.28788	1.79529	0.111786	1.13303	73.8241	189.275	154.029	0	0
22	3.53197e+06	5.3827e+06	Owen	1	13.3854	3	0.133333	0.47619	1	0.354167	1144.8	135796	0.0209053	1.31243	1.74632	0.117756	1.05	981.899	82.4621	82.4621	0	0
23	3.5229e+06	5.37412e+06	Metzingen	0	7.23021	3	0.2	0.214953	0.428571	0.165138	990.1	586556	0.010557	1.18686	1.56641	0.121267	1.33648	114.018	367.185	96.1769	0	0
24	3.53105e+06	5.39209e+06	Kirchheim unter Teck	1	3.30229	3	0.181818	0.241379	0.181818	0.245098	2185.7	163767	0.0222553	1.22208	1.69769	0.119627	1.30893	366.197	364.177	364.177	0	0
25	3.52821e+06	5.38716e+06	Nürtingen	0	9.56067	3	0.2	0.22314	0.315789	0.226277	436.7	202237	0.0144545	1.36016	1.73962	0.12287	1.1157	364.177	744.648	116.297	0	0
26	3.52575e+06	5.37614e+06	Dettingen an der Erms	0	5.44814	3	0.230769	0.166667	1	0.159091	2902.3	1.10291e+06	0.0123476	1.25849	1.75538	0.113123	1.88725	155.724	54.0833	31.6228	0	0
27	3.53401e+06	5.38228e+06	Lenningen	0	11.5228	3	0.277778	0.221311	0	0.288288	423.2	2.05861e+06	0.00932867	1.09145	1.55231	0.106074	0.965142	20	297.405	58.5235	0	0
28	3.52998e+06	5.38992e+06	Kirchheim unter Teck	0	3.88064	3	0.181818	0.241379	0.181818	0.245098	2790.6	80538.4	0.0242076	1.22208	1.69769	0.119627	1.30893	105.119	558.144	26.9258	0	0
29	3.52944e+06	5.3824e+06	Beuren	0	8.13069	3	0.076923	0.333333	0.333333	0.195652	1731.5	333570	0.0172854	1.14684	1.5569	0.11726	1.02703	515.8	564.358	130	0	0
30	3.5458e+06	5.38963e+06	Boll	0	1.74453	2	0.285714	2.5	1	0.538462	3963.7	68412.9	0.0244689	1.35042	1.91502	0.160651	1.21591	140.89	377.69	40	0	0
31	3.50551e+06	5.36484e+06	Nehren	0	2.86333	3	0	0	0	0	1371.3	1.29779e+06	0.0060432	1.69551	2.29424	0.103814	1.45652	526.047	515.485	40.3113	0	0
32	3.5425e+06	5.38232e+06	Neidlingen	0	13.7504	0	0.2	0.157143	1	0.114286	0	124359	0.0160526	1.31936	1.78261	0.10745	0.909091	168.003	482.83	83.8153	0	0
33	3.51411e+06	5.3682e+06	Pfullingen	0	6.46862	3	0.363636	0.576923	0.285714	0.567568	10545.3	20815.5	0.0334328	1.16265	1.70163	0.117938	1.10118	1331.63	169.779	169.779	0	0
34	3.51097e+06	5.37462e+06	Wannweil	0	8.25095	0	0.5	0.2	0.2	0.166667	0	359132	0.0117938	1.10228	1.56674	0.126792	1.42478	310.483	963.146	290.689	0	0
35	3.53891e+06	5.38831e+06	Holzmaden	1	4.4135	3	1	0.166667	0	0.235294	4480.4	95363	0.0173961	1.40334	1.87306	0.117076	1.13889	203.531	123.693	133.417	0	0
36	3.54725e+06	5.39318e+06	Heiningen	0	6.65915	3	0.185185	0.526316	1	0.348837	16016.5	14964.6	0.0475052	1.53551	2.04153	0.103488	1.07647	838.153	147.054	134.629	0	0
37	3.50529e+06	5.36253e+06	Mössingen	0	5.14935	3	0.304348	0.11465	0	0.151316	1599.4	1.71355e+06	0.0133141	1.60177	2.13591	0.0976952	1.05316	315.634	961.769	221.359	0	0
38	3.52834e+06	5.37992e+06	Neuffen	0	7.70766	0	0.333333	0.326531	0.333333	0.222222	11233.7	32686.2	0.0415117	1.28788	1.79529	0.111786	1.13303	0	356.265	109.772	0	0
39	3.53529e+06	5.38718e+06	Kirchheim unter Teck	0	7.34029	3	0.181818	0.241379	0.181818	0.245098	8741.9	89822.2	0.0308221	1.22208	1.69769	0.119627	1.30893	161.012	515	26.9258	0	0
40	3.53819e+06	5.39466e+06	Ebersbach an der Fils	0	7.32912	0	0.288136	0.571429	0	0.370787	1308.5	160757	0.0210849	1.1282	1.82888	0.0992791	1.14139	905.345	417.043	36.4006	0	0
41	3.56026e+06	5.39337e+06	Donzdorf	0	3.72191	3	0.327273	0.537037	0	0.479592	2815.4	29518.7	0.0410024	1.1454	1.8843	0.103731	1.31707	386.394	1260.29	67.082	0	0
42	3.53452e+06	5.38493e+06	Dettingen unter Teck	0	16.8631	3	0.2	0.049296	0	0.107692	770.8	2.05861e+06	0.00932867	1.37194	1.76895	0.12934	1.03196	991.817	823.65	63.6396	0	0
43	3.50266e+06	5.36713e+06	Dußlingen	0	6.24949	3	0.2	0.128205	0	0.090909	739.7	444598	0.020699	1.22642	1.77338	0.102978	0.989209	1178.58	1654.69	116.619	0	0
44	3.52789e+06	5.38059e+06	Neuffen	0	7.425	3	0.333333	0.326531	0.333333	0.222222	1858.5	328248	0.0129061	1.28788	1.79529	0.111786	1.13303	103.078	117.686	117.686	0	0
45	3.53109e+06	5.38639e+06	Dettingen unter Teck	1	14.2969	0	0.2	0.049296	0	0.107692	6090.7	111368	0.023383	1.37194	1.76895	0.12934	1.03196	1771.16	2195.59	445.253	0	0
46	3.54527e+06	5.3905e+06	Boll	1	4.52082	3	0.285714	2.5	1	0.538462	7242.4	10359.9	0.0542356	1.35042	1.91502	0.160651	1.21591	105	75	75	0	0
47	3.5193e+06	5.38257e+06	Bempflingen	0	8.84527	3	0.333333	0.363636	1	0.272727	2202.5	319527	0.0177893	1.26159	1.79849	0.0983425	1.38889	199.123	491.935	150.083	0	0
48	3.53563e+06	5.39069e+06	Kirchheim unter Teck	0	4.43431	3	0.181818	0.241379	0.181818	0.245098	1860.4	275546	0.0139559	1.22208	1.69769	0.119627	1.30893	403.113	700.036	309.919	0	0
49	3.51303e+06	5.37198e+06	Reutlingen	0	24.0704	0	0.21978	0.19774	0.205882	0.215686	832.9	597842	0.0117804	1.23563	1.5396	0.120979	1.29265	330.151	850.529	53.1507	0	0
50	3.52383e+06	5.38002e+06	Kohlberg	0	7.62942	3	0.25	0.076923	0	0.035714	1786	305005	0.0192568	1.33489	1.88101	0.109253	1.40323	523.474	205	205	0	0
51	3.51516e+06	5.3784e+06	Reutlingen	0	5.8344	2	0.21978	0.19774	0.205882	0.215686	1690.1	8090.78	0.050803	1.23563	1.5396	0.120979	1.29265	155.081	66.7083	66.7083	0	0
52	3.53833e+06	5.39463e+06	Ebersbach an der Fils	0	5.86453	3	0.288136	0.571429	0	0.370787	733.1	160757	0.0210849	1.1282	1.82888	0.0992791	1.14139	1053.42	519.158	98.2344	0	0
53	3.53192e+06	5.3916e+06	Kirchheim unter Teck	0	16.9184	5	0.181818	0.241379	0.181818	0.245098	1898.5	304064	0.0173842	1.22208	1.69769	0.119627	1.30893	106.066	460.136	129.711	0	0
54	3.51334e+06	5.37175e+06	Reutlingen	1	7.13982	3	0.21978	0.19774	0.205882	0.215686	3805.3	597842	0.0117804	1.23563	1.5396	0.120979	1.29265	174.929	714.213	106.066	0	0
55	3.50697e+06	5.36726e+06	Gomaringen	0	3.52492	3	0.25	0.196429	0.5	0.155172	396.2	276983	0.0102789	1.48373	1.85863	0.0970857	1.08571	334.701	885.904	114.018	0	0
56	3.51891e+06	5.38181e+06	Bempflingen	0	5.67673	3	0.333333	0.363636	1	0.272727	1750.8	269162	0.020936	1.26159	1.79849	0.0983425	1.38889	171.026	145	145	0	0
57	3.52157e+06	5.3758e+06	Metzingen	0	25.7039	3	0.2	0.214953	0.428571	0.165138	799.7	505116	0.00726691	1.18686	1.56641	0.121267	1.33648	1195.41	994.548	259.422	0	0
58	3.51282e+06	5.37637e+06	Reutlingen	0	2.13762	2	0.21978	0.19774	0.205882	0.215686	1020.6	18120.7	0.0474681	1.23563	1.5396	0.120979	1.29265	55	60.8276	60.8276	0	0
59	3.52555e+06	5.38084e+06	Kohlberg	0	14.2379	3	0.25	0.076923	0	0.035714	376.8	1.20814e+06	0.013945	1.33489	1.88101	0.109253	1.40323	265.047	556.619	102.591	0	0
60	3.52661e+06	5.3824e+06	Frickenhausen	0	11.0148	3	0.125	0.076923	0.5	0.054054	732.8	1.34387e+06	0.00860131	1.19047	1.7225	0.103565	1.05882	347.311	718.418	169.853	0	0
61	3.51749e+06	5.37406e+06	Reutlingen	0	4.25561	0	0.21978	0.19774	0.205882	0.215686	2808	851648	0.00670136	1.23563	1.5396	0.120979	1.29265	238.38	35	35	0	0
62	3.53489e+06	5.39591e+06	Hochdorf	1	5.85171	2	0.052632	0.307692	1	0.129032	3183.3	539415	0.0175797	1.34266	2.08222	0.0941176	1.33333	155.322	756.984	69.4622	0	0
63	3.52819e+06	5.37956e+06	Neuffen	1	25.2995	0	0.333333	0.326531	0.333333	0.222222	585.6	48257.7	0.0265136	1.28788	1.79529	0.111786	1.13303	0	141.421	5	0	0
64	3.52736e+06	5.38198e+06	Frickenhausen	0	8.94981	3	0.125	0.076923	0.5	0.054054	814	1.34387e+06	0.00860131	1.19047	1.7225	0.103565	1.05882	109.659	285	123.491	0	0
65	3.5224e+06	5.37547e+06	Metzingen	0	4.38329	3	0.2	0.214953	0.428571	0.165138	1391.5	227715	0.019749	1.18686	1.56641	0.121267	1.33648	445.982	325	26.9258	0	0
66	3.51146e+06	5.36958e+06	Reutlingen	1	35.2111	0	0.21978	0.19774	0.205882	0.215686	78608.3	43391.3	0.020303	1.23563	1.5396	0.120979	1.29265	1017.51	10	10	0	0
67	3.53927e+06	5.38594e+06	Weilheim an der Teck	0	9.40917	3	0.297297	0.193798	0.230769	0.204545	1077.7	1.55086e+06	0.00669018	1.28113	1.82018	0.108577	1.03917	125	417.732	120	1	0
68	3.52236e+06	5.38407e+06	Großbettlingen	0	6.57097	3	0.333333	0.222222	0	0.25	2250.4	62314.9	0.0222792	1.73035	2.47265	0.0858525	1.60976	47.1699	198.116	65.192	0	0
69	3.50542e+06	5.3664e+06	Nehren	1	6.01351	0	0	0	0	0	671.3	49004.4	0.0210708	1.69551	2.29424	0.103814	1.45652	0	140	20.6155	0	0
70	3.55108e+06	5.39407e+06	Göppingen	1	8.9417	0	0.245902	0.57377	0.315789	0.36875	2003.5	100380	0.0359038	1.02208	1.4472	0.138668	1.15129	155.081	360.035	79.0569	0	0
71	3.54676e+06	5.39994e+06	Rechberghausen	0	4.41619	2	0.454545	0.5	0	0.545455	1501.4	5616.33	0.0659495	1.17103	1.82626	0.112584	1.18	10	279.732	40	0	0
72	3.49748e+06	5.36218e+06	Bodelshausen	0	7.48063	3	0.5	0.037037	0	0.25	2225.4	165859	0.0153032	1.62158	2.06108	0.103155	1.18996	15	459.048	168.671	0	0
73	3.5284e+06	5.38111e+06	Beuren	0	7.34244	3	0.076923	0.333333	0.333333	0.195652	623	328248	0.0129061	1.14684	1.5569	0.11726	1.02703	185.54	386.943	90	0	0
74	3.50519e+06	5.36218e+06	Mössingen	0	12.5905	3	0.304348	0.11465	0	0.151316	26833.9	1.71355e+06	0.0133141	1.60177	2.13591	0.0976952	1.05316	553.376	1311.96	374.433	0	1
75	3.53378e+06	5.38377e+06	Owen	0	8.76036	3	0.133333	0.47619	1	0.354167	1199	2.05861e+06	0.00932867	1.31243	1.74632	0.117756	1.05	69.4622	140.89	71.0634	0	0
76	3.52621e+06	5.37558e+06	Dettingen an der Erms	1	10.1715	0	0.230769	0.166667	1	0.159091	2966.4	1.10291e+06	0.0123476	1.25849	1.75538	0.113123	1.88725	336.006	11.1803	11.1803	0	0
77	3.51736e+06	5.37375e+06	Reutlingen	0	3.99937	3	0.21978	0.19774	0.205882	0.215686	2879	851648	0.00670136	1.23563	1.5396	0.120979	1.29265	120.83	128.55	71.5891	0	0
78	3.50923e+06	5.37175e+06	Kusterdingen	0	9.76974	2	0.259259	0.168675	1	0.153226	5725.6	774234	0.0129779	1.39645	1.80254	0.10766	1.5061	560	780.016	245.153	0	0
79	3.51809e+06	5.37041e+06	Pfullingen	0	7.60488	3	0.363636	0.576923	0.285714	0.567568	857.3	161588	0.0147898	1.16265	1.70163	0.117938	1.10118	460.977	805	20.6155	0	0
80	3.50128e+06	5.36591e+06	Ofterdingen	0	4.61241	0	0.363636	0.076923	1	0.142857	0	908719	0.0134922	1.64931	2.09688	0.10547	0.946809	865.361	1254.44	127.279	0	0
81	3.53021e+06	5.38961e+06	Kirchheim unter Teck	1	4.21665	3	0.181818	0.241379	0.181818	0.245098	1590.7	8223.39	0.0530223	1.22208	1.69769	0.119627	1.30893	163.248	250	203.531	0	0
82	3.51081e+06	5.37424e+06	Wannweil	0	9.77383	3	0.5	0.2	0.2	0.166667	1028.6	359132	0.0117938	1.10228	1.56674	0.126792	1.42478	475	683.52	71.5891	0	0
83	3.53819e+06	5.3841e+06	Bissingen an der Teck	1	8.14832	3	0.333333	0.212766	0.5	0.254237	1288.1	210695	0.0113736	1.35031	1.68719	0.114481	0.989418	1173.88	927.16	60.208	0	1
84	3.50462e+06	5.36216e+06	Mössingen	0	6.85942	3	0.304348	0.11465	0	0.151316	1597	1.71355e+06	0.0133141	1.60177	2.13591	0.0976952	1.05316	165.605	1109.1	179.234	0	0
85	3.53223e+06	5.38678e+06	Dettingen unter Teck	0	6.46496	3	0.2	0.049296	0	0.107692	1426.4	1.70997e+06	0.00989906	1.37194	1.76895	0.12934	1.03196	568.793	1410	96.0469	0	0
86	3.53988e+06	5.38435e+06	Weilheim an der Teck	0	10.3198	3	0.297297	0.193798	0.230769	0.204545	3213.8	437760	0.0135106	1.28113	1.82018	0.108577	1.03917	575.087	600.521	30.4138	0	0
87	3.50583e+06	5.36469e+06	Nehren	0	9.24937	3	0	0	0	0	2834.6	1.29779e+06	0.0060432	1.69551	2.29424	0.103814	1.45652	710.018	670.075	40.3113	0	0
88	3.52291e+06	5.37829e+06	Metzingen	0	10.9229	3	0.2	0.214953	0.428571	0.165138	1082.5	2.35355e+06	0.00791344	1.18686	1.56641	0.121267	1.33648	627.096	464.247	235.478	0	0
89	3.54107e+06	5.38544e+06	Weilheim an der Teck	1	7.55817	3	0.297297	0.193798	0.230769	0.204545	3418.3	416375	0.00954846	1.28113	1.82018	0.108577	1.03917	885.014	316.623	143.178	0	0
90	3.51738e+06	5.37301e+06	Reutlingen	0	11.3377	0	0.21978	0.19774	0.205882	0.215686	4233.6	159894	0.0198295	1.23563	1.5396	0.120979	1.29265	180.624	60	60	0	0
91	3.51998e+06	5.37088e+06	Eningen unter Achalm	0	14.77	3	0.388889	0.6	0.4	0.392857	98.6	538420	0.0157695	1.29455	1.67437	0.110704	1.02949	654.714	1275.98	163.248	0	0
92	3.53157e+06	5.3865e+06	Dettingen unter Teck	1	6.07023	3	0.2	0.049296	0	0.107692	1446.2	1.70997e+06	0.00989906	1.37194	1.76895	0.12934	1.03196	1280.82	2040.81	105	0	0
93	3.53192e+06	5.38653e+06	Dettingen unter Teck	0	6.10758	3	0.2	0.049296	0	0.107692	2483	1.70997e+06	0.00989906	1.37194	1.76895	0.12934	1.03196	944.299	1706.35	116.726	0	0
94	3.52076e+06	5.38117e+06	Bempflingen	0	5.88389	3	0.333333	0.363636	1	0.272727	1869.8	257751	0.0186256	1.26159	1.79849	0.0983425	1.38889	233.773	219.146	76.1577	0	0
95	3.53033e+06	5.38189e+06	Beuren	0	4.27248	3	0.076923	0.333333	0.333333	0.195652	124.9	508268	0.0193484	1.14684	1.5569	0.11726	1.02703	184.459	70	18.0278	0	0
96	3.53011e+06	5.38201e+06	Beuren	0	5.31369	3	0.076923	0.333333	0.333333	0.195652	246.7	508268	0.0193484	1.14684	1.5569	0.11726	1.02703	273.724	231.193	219.146	0	0
97	3.50144e+06	5.36564e+06	Ofterdingen	0	3.14407	2	0.363636	0.076923	1	0.142857	1002.1	908719	0.0134922	1.64931	2.09688	0.10547	0.946809	559.464	969.149	167.705	0	0
98	3.51229e+06	5.37391e+06	Reutlingen	1	0.433075	0	0.21978	0.19774	0.205882	0.215686	43670.6	115045	0.0187089	1.23563	1.5396	0.120979	1.29265	0	190.919	63.6396	0	0
99	3.51715e+06	5.37996e+06	Reutlingen	0	6.32412	2	0.21978	0.19774	0.205882	0.215686	1934.9	46837.1	0.0290596	1.23563	1.5396	0.120979	1.29265	152.069	295.042	147.648	0	0
100	3.5023e+06	5.3673e+06	Dußlingen	0	1.929	3	0.2	0.128205	0	0.090909	824.5	444598	0.020699	1.22642	1.77338	0.102978	0.989209	1443.65	2028.85	263.154	0	1
101	3.53514e+06	5.38e+06	Lenningen	0	14.4728	0	0.277778	0.221311	0	0.288288	0	1.54264e+06	0.0133674	1.09145	1.55231	0.106074	0.965142	435.029	498.197	498.197	1	0
102	3.52462e+06	5.37659e+06	Dettingen an der Erms	0	14.1151	0	0.230769	0.166667	1	0.159091	5402.5	1.10291e+06	0.0123476	1.25849	1.75538	0.113123	1.88725	148.071	20	20	0	0
103	3.51133e+06	5.36727e+06	Reutlingen	0	8.12013	3	0.21978	0.19774	0.205882	0.215686	1008.5	408466	0.0191366	1.23563	1.5396	0.120979	1.29265	156.924	115.109	62.6498	0	0
104	3.51029e+06	5.36612e+06	Reutlingen	0	11.7346	3	0.21978	0.19774	0.205882	0.215686	1646.2	483983	0.0103605	1.23563	1.5396	0.120979	1.29265	159.531	395.79	25	0	0
105	3.52153e+06	5.37643e+06	Metzingen	0	12.3218	3	0.2	0.214953	0.428571	0.165138	695.5	505116	0.00726691	1.18686	1.56641	0.121267	1.33648	713.442	460	42.72	0	0
106	3.52502e+06	5.37839e+06	Dettingen an der Erms	0	9.16175	3	0.230769	0.166667	1	0.159091	1367.5	2.35355e+06	0.00791344	1.25849	1.75538	0.113123	1.88725	531.413	542.517	542.517	0	0
107	3.50179e+06	5.36631e+06	Ofterdingen	0	0.560304	3	0.363636	0.076923	1	0.142857	704.4	908719	0.0134922	1.64931	2.09688	0.10547	0.946809	981.122	1571.63	67.082	0	1
108	3.52455e+06	5.37783e+06	Dettingen an der Erms	0	7.81526	3	0.230769	0.166667	1	0.159091	309.8	2.35355e+06	0.00791344	1.25849	1.75538	0.113123	1.88725	439.602	30.4138	30.4138	0	0
109	3.50672e+06	5.3686e+06	Gomaringen	0	12.9701	3	0.25	0.196429	0.5	0.155172	1569.8	98374.8	0.0245807	1.48373	1.85863	0.0970857	1.08571	186.682	259.326	259.326	0	0
110	3.53324e+06	5.3914e+06	Kirchheim unter Teck	0	4.34843	3	0.181818	0.241379	0.181818	0.245098	2671.8	124195	0.0141063	1.22208	1.69769	0.119627	1.30893	50	344.42	50.9902	0	0
111	3.50521e+06	5.36223e+06	Mössingen	0	10.9773	3	0.304348	0.11465	0	0.151316	26833.9	1.71355e+06	0.0133141	1.60177	2.13591	0.0976952	1.05316	524.619	1268.56	333.654	0	1
112	3.51556e+06	5.36772e+06	Pfullingen	0	7.10791	3	0.363636	0.576923	0.285714	0.567568	2114.4	520492	0.0100736	1.16265	1.70163	0.117938	1.10118	331.361	111.803	111.803	0	0
113	3.51581e+06	5.36795e+06	Pfullingen	0	7.49834	3	0.363636	0.576923	0.285714	0.567568	1509.5	520492	0.0100736	1.16265	1.70163	0.117938	1.10118	174.428	161.4	161.4	0	0
114	3.5132e+06	5.37228e+06	Reutlingen	0	2.91818	3	0.21978	0.19774	0.205882	0.215686	1002.3	597842	0.0117804	1.23563	1.5396	0.120979	1.29265	268.794	585.769	60.8276	0	0
115	3.52896e+06	5.37829e+06	Neuffen	0	7.7599	0	0.333333	0.326531	0.333333	0.222222	2332.3	1.04757e+06	0.0118645	1.28788	1.79529	0.111786	1.13303	972.33	446.374	204.083	0	0
116	3.52947e+06	5.39156e+06	Wendlingen am Neckar	0	6.05723	2	0.357143	0.071429	0.333333	0.375	893.4	403361	0.00978381	1.17744	1.7408	0.0861055	1.28011	506.211	503.289	38.0789	0	0
117	3.52714e+06	5.38483e+06	Frickenhausen	0	5.24995	3	0.125	0.076923	0.5	0.054054	1688.3	1.08813e+06	0.00929233	1.19047	1.7225	0.103565	1.05882	46.0977	919.035	169.189	0	0
118	3.51695e+06	5.37103e+06	Pfullingen	1	1.11749	0	0.363636	0.576923	0.285714	0.567568	1224	104667	0.0156468	1.16265	1.70163	0.117938	1.10118	0	375.666	10	0	0
119	3.51655e+06	5.38126e+06	Neckartenzlingen	0	0	0	0	0.1	1	0.266667	0	27359.6	0.0279177	1.30354	1.90761	0.0887945	1.23404	567.208	579.418	564.469	0	0
120	3.53998e+06	5.3857e+06	Weilheim an der Teck	0	31.6874	4	0.297297	0.193798	0.230769	0.204545	1160.8	1.55086e+06	0.00669018	1.28113	1.82018	0.108577	1.03917	183.984	263.866	28.2843	1	0
121	3.55873e+06	5.39118e+06	Gingen an der Fils	0	15.2512	3	0.25	0.588235	0	0.535714	9513.5	482787	0.0230543	1.1043	1.56275	0.127738	1.25	292.617	1035.81	287.837	0	0
122	3.51615e+06	5.37665e+06	Reutlingen	0	13.0015	3	0.21978	0.19774	0.205882	0.215686	3536.4	111588	0.0198436	1.23563	1.5396	0.120979	1.29265	106.066	594.916	102.591	0	0
123	3.54753e+06	5.3939e+06	Göppingen	1	3.79885	3	0.245902	0.57377	0.315789	0.36875	5060.3	261917	0.0182301	1.02208	1.4472	0.138668	1.15129	562.694	374.767	91.9239	0	0
124	3.53414e+06	5.38289e+06	Lenningen	0	24.4741	3	0.277778	0.221311	0	0.288288	1129.3	2.05861e+06	0.00932867	1.09145	1.55231	0.106074	0.965142	485.026	668.599	507.001	0	0
125	3.55513e+06	5.39279e+06	Süßen	1	2.0848	3	0.166667	0.428571	0.333333	0.243243	1637.2	26850.1	0.0337778	1.2209	1.69688	0.108562	1.57604	322.025	377.69	103.078	0	0
126	3.53336e+06	5.38187e+06	Lenningen	0	17.2278	4	0.277778	0.221311	0	0.288288	19362.4	530404	0.0193153	1.09145	1.55231	0.106074	0.965142	160	375	143.178	0	0
127	3.53395e+06	5.39318e+06	Notzingen	0	5.80633	3	0.2	0.16	0	0.181818	650	168973	0.0183377	1.58633	2.37363	0.106287	1.20792	71.0634	438.292	91.9239	0	0
128	3.53485e+06	5.38019e+06	Lenningen	0	12.1018	0	0.277778	0.221311	0	0.288288	0	1.54264e+06	0.0133674	1.09145	1.55231	0.106074	0.965142	165.68	301.869	294.364	0	0
129	3.52418e+06	5.37759e+06	Dettingen an der Erms	0	28.1439	3	0.230769	0.166667	1	0.159091	1017.8	2.35355e+06	0.00791344	1.25849	1.75538	0.113123	1.88725	301.04	469.574	161.012	0	0
130	3.52651e+06	5.3777e+06	Dettingen an der Erms	0	8.93511	3	0.230769	0.166667	1	0.159091	224.5	829066	0.00919869	1.25849	1.75538	0.113123	1.88725	352.598	1649.01	74.3303	0	0
131	3.5355e+06	5.38338e+06	Bissingen an der Teck	0	7.69332	4	0.333333	0.212766	0.5	0.254237	1.87545e+06	1.06197e+06	0.0117425	1.35031	1.68719	0.114481	0.989418	843.579	1250.61	22.3607	1	0
132	3.50189e+06	5.36619e+06	Ofterdingen	0	2.65113	2	0.363636	0.076923	1	0.142857	1041	908719	0.0134922	1.64931	2.09688	0.10547	0.946809	830.015	1433.61	30	0	0
133	3.50434e+06	5.36124e+06	Mössingen	0	12.0076	4	0.304348	0.11465	0	0.151316	7697.1	1.71355e+06	0.0133141	1.60177	2.13591	0.0976952	1.05316	870.316	1696.23	107.355	1	0
134	3.51668e+06	5.371e+06	Pfullingen	1	2.42438	0	0.363636	0.576923	0.285714	0.567568	2137.5	104667	0.0156468	1.16265	1.70163	0.117938	1.10118	0	122.984	60	0	0
135	3.5394e+06	5.3842e+06	Weilheim an der Teck	1	15.1922	3	0.297297	0.193798	0.230769	0.204545	3225.4	437760	0.0135106	1.28113	1.82018	0.108577	1.03917	432.464	744.043	122.577	0	0
136	3.55168e+06	5.3904e+06	Schlat	0	3.25942	3	0.5	0.363636	0	0.361111	8714.7	201650	0.0267818	1.21365	1.90775	0.123203	1.17333	76.4853	275.545	41.2311	0	0
137	3.5383e+06	5.38466e+06	Bissingen an der Teck	1	8.34301	3	0.333333	0.212766	0.5	0.254237	9252.6	26180	0.0364243	1.35031	1.68719	0.114481	0.989418	1382.69	1081.87	141.421	0	1
138	3.53193e+06	5.38314e+06	Owen	0	13.6252	0	0.133333	0.47619	1	0.354167	1298.3	135796	0.0209053	1.31243	1.74632	0.117756	1.05	965.194	302.2	107.005	0	0
139	3.52426e+06	5.37967e+06	Kohlberg	0	8.39813	3	0.25	0.076923	0	0.035714	1285	305005	0.0192568	1.33489	1.88101	0.109253	1.40323	76.1577	136.015	72.111	0	0
140	3.52644e+06	5.37933e+06	Neuffen	0	7.30964	3	0.333333	0.326531	0.333333	0.222222	781.2	674506	0.0153244	1.28788	1.79529	0.111786	1.13303	704.45	675.666	210.297	0	0
141	3.53173e+06	5.39432e+06	Wernau (Neckar)	0	4.07923	3	0.285714	0.214286	0	0.384615	1458.1	88493.4	0.0156843	0.987809	1.53707	0.0834862	1.16606	123.491	340	88.6002	0	0
142	3.50719e+06	5.36429e+06	Mössingen	0	15.9176	3	0.304348	0.11465	0	0.151316	392.4	373172	0.0131412	1.60177	2.13591	0.0976952	1.05316	214.009	371.383	186.815	0	0
143	3.53932e+06	5.38586e+06	Weilheim an der Teck	0	6.83095	3	0.297297	0.193798	0.230769	0.204545	541.6	1.55086e+06	0.00669018	1.28113	1.82018	0.108577	1.03917	199.06	510.906	148.661	1	0
144	3.54101e+06	5.38762e+06	Weilheim an der Teck	0	4.71546	3	0.297297	0.193798	0.230769	0.204545	1405.6	1.26914e+06	0.00550867	1.28113	1.82018	0.108577	1.03917	180.347	449.055	176.777	0	0
145	3.52127e+06	5.3762e+06	Metzingen	0	4.63836	3	0.2	0.214953	0.428571	0.165138	840.7	505116	0.00726691	1.18686	1.56641	0.121267	1.33648	932.148	730.548	65	0	0
146	3.5339e+06	5.38558e+06	Dettingen unter Teck	1	8.33042	2	0.2	0.049296	0	0.107692	2424	2.05861e+06	0.00932867	1.37194	1.76895	0.12934	1.03196	460.896	426.878	268.328	0	0
147	3.51409e+06	5.37855e+06	Reutlingen	1	6.21454	2	0.21978	0.19774	0.205882	0.215686	1155.9	75411.3	0.0267892	1.23563	1.5396	0.120979	1.29265	15.8114	618.466	104.403	0	0
148	3.52154e+06	5.38363e+06	Großbettlingen	1	16.5957	3	0.333333	0.222222	0	0.25	1072.1	19452.5	0.0308799	1.73035	2.47265	0.0858525	1.60976	724.034	393.224	97.0824	0	0
149	3.50995e+06	5.37189e+06	Kusterdingen	0	3.04172	3	0.259259	0.168675	1	0.153226	663.8	774234	0.0129779	1.39645	1.80254	0.10766	1.5061	456.207	642.359	187.216	0	0
150	3.54219e+06	5.3898e+06	Zell unter Aichelberg	0	2.23161	2	0.266667	0.291667	0	0.297297	1530.3	262210	0.0205352	2.1257	2.71429	0.101889	1.52475	145.086	150.748	145	0	0
151	3.55804e+06	5.38841e+06	Kuchen	0	5.6343	3	0.333333	1	0	0.6	886.2	1.18824e+06	0.0115027	1.02878	1.52941	0.11358	1.13072	357.246	1038.56	154.353	0	0
152	3.52743e+06	5.38868e+06	Oberboihingen	1	8.15797	0	0.285714	0.357143	0	0.444444	0	136649	0.0200102	1.40177	1.84244	0.101036	1.11644	720.85	538.075	538.075	0	0
153	3.5525e+06	5.39475e+06	Eislingen/ Fils	0	3.20424	2	0.225	0.75	0.6	0.395833	6728.8	111053	0.0270164	1.10179	1.50558	0.120292	1.10272	55.9017	495.101	35	0	0
154	3.55644e+06	5.39307e+06	Süßen	0	0.897252	3	0.166667	0.428571	0.333333	0.243243	314.8	243599	0.019395	1.2209	1.69688	0.108562	1.57604	194.165	205.061	192.354	0	0
155	3.51079e+06	5.37442e+06	Wannweil	0	9.81932	2	0.5	0.2	0.2	0.166667	6874.3	359132	0.0117938	1.10228	1.56674	0.126792	1.42478	488.109	860.233	18.0278	0	0
156	3.5328e+06	5.38903e+06	Kirchheim unter Teck	0	3.24139	2	0.181818	0.241379	0.181818	0.245098	1507	3756.35	0.0897499	1.22208	1.69769	0.119627	1.30893	120.208	330.151	80.6226	0	0
157	3.53506e+06	5.38783e+06	Kirchheim unter Teck	0	3.90994	3	0.181818	0.241379	0.181818	0.245098	1919.1	78972.2	0.0207312	1.22208	1.69769	0.119627	1.30893	520.697	314.006	35.3553	0	0
158	3.5565e+06	5.39045e+06	Gingen an der Fils	0	8.44687	3	0.25	0.588235	0	0.535714	4161.5	2068.31	0.109676	1.1043	1.56275	0.127738	1.25	1048.07	453.1	68.0074	0	0
159	3.53569e+06	5.39309e+06	Notzingen	1	13.9873	3	0.2	0.16	0	0.181818	5285.5	9860.15	0.0964466	1.58633	2.37363	0.106287	1.20792	472.705	41.2311	41.2311	0	0
160	3.54086e+06	5.38286e+06	Neidlingen	0	11.433	3	0.2	0.157143	1	0.114286	24287.8	1.48249e+06	0.00924149	1.31936	1.78261	0.10745	0.909091	340.074	521.752	214.709	0	0
161	3.54707e+06	5.39102e+06	Dürnau	1	1.87196	3	0.461538	0.545455	1	0.5	24803.9	40594	0.0265829	1.42809	2.06038	0.0877763	1.47761	239.635	610.512	120.208	0	0
162	3.52764e+06	5.3789e+06	Neuffen	0	6.65758	3	0.333333	0.326531	0.333333	0.222222	2250.6	1.04757e+06	0.0118645	1.28788	1.79529	0.111786	1.13303	200.562	707.107	123.491	0	0
163	3.5383e+06	5.39042e+06	Ohmden	1	6.70925	3	0.5	0.103448	0	0.148148	2656.8	584209	0.0130428	1.41308	2.06513	0.102155	1.23529	335.596	515	251.247	0	0
164	3.54282e+06	5.39216e+06	Hattenhofen	0	7.84398	3	0.1	0.55	0	0.342105	5404.3	21451.6	0.058657	1.84567	2.32571	0.107832	1.25893	98.2344	330.151	200.998	0	0
165	3.5417e+06	5.38324e+06	Neidlingen	0	15.3181	3	0.2	0.157143	1	0.114286	3853.9	881477	0.0160684	1.31936	1.78261	0.10745	0.909091	169.189	353.553	18.0278	0	0
166	3.5194e+06	5.38258e+06	Bempflingen	0	8.94454	3	0.333333	0.363636	1	0.272727	4113.7	319527	0.0177893	1.26159	1.79849	0.0983425	1.38889	271.017	532.4	227.706	0	0
167	3.5261e+06	5.38074e+06	Neuffen	0	6.15875	2	0.333333	0.326531	0.333333	0.222222	1472.3	1.20814e+06	0.013945	1.28788	1.79529	0.111786	1.13303	650.711	662.873	14.1421	0	0
168	3.53645e+06	5.3955e+06	Ebersbach an der Fils	0	6.4861	3	0.288136	0.571429	0	0.370787	1675.7	539415	0.0175797	1.1282	1.82888	0.0992791	1.14139	380.789	487.468	406.356	0	0
169	3.54779e+06	5.39017e+06	Gammelshausen	1	1.54038	2	0.25	0.5	0	0.4375	6153.3	53040.9	0.0365195	2.12843	2.98473	0.0807799	1.33333	277.714	136.473	136.473	0	0
170	3.51554e+06	5.37029e+06	Pfullingen	0	12.7761	4	0.363636	0.576923	0.285714	0.567568	1024.1	898104	0.00809342	1.16265	1.70163	0.117938	1.10118	122.577	858.735	157.877	0	0
171	3.52652e+06	5.38106e+06	Neuffen	0	6.78074	2	0.333333	0.326531	0.333333	0.222222	4398.6	1.20814e+06	0.013945	1.28788	1.79529	0.111786	1.13303	702.282	1049.38	33.541	0	0
172	3.53193e+06	5.3859e+06	Dettingen unter Teck	0	11.5248	3	0.2	0.049296	0	0.107692	1664.4	1.70997e+06	0.00989906	1.37194	1.76895	0.12934	1.03196	1096.02	1558.66	68.0074	0	0
173	3.53411e+06	5.38342e+06	Owen	0	6.23003	3	0.133333	0.47619	1	0.354167	946.5	2.05861e+06	0.00932867	1.31243	1.74632	0.117756	1.05	364.486	296.184	296.184	0	0
174	3.52515e+06	5.37775e+06	Dettingen an der Erms	0	8.7043	2	0.230769	0.166667	1	0.159091	859	2.35355e+06	0.00791344	1.25849	1.75538	0.113123	1.88725	117.686	493.28	135.37	0	0
175	3.53924e+06	5.38337e+06	Weilheim an der Teck	0	12.2278	3	0.297297	0.193798	0.230769	0.204545	2064	1.48249e+06	0.00924149	1.28113	1.82018	0.108577	1.03917	134.629	315.317	188.215	0	0
176	3.54829e+06	5.39821e+06	Göppingen	1	14.3518	3	0.245902	0.57377	0.315789	0.36875	2405.9	50192.7	0.0372932	1.02208	1.4472	0.138668	1.15129	134.536	205.244	116.726	0	0
177	3.54675e+06	5.39242e+06	Heiningen	0	5.64588	3	0.185185	0.526316	1	0.348837	31661.5	68604.6	0.0265605	1.53551	2.04153	0.103488	1.07647	509.141	633.759	158.902	0	0
178	3.54319e+06	5.39176e+06	Hattenhofen	0	3.38684	3	0.1	0.55	0	0.342105	4676.1	59850.5	0.020199	1.84567	2.32571	0.107832	1.25893	485	872.611	455.412	0	0
179	3.53265e+06	5.38546e+06	Dettingen unter Teck	0	9.208	3	0.2	0.049296	0	0.107692	1313.5	1.70997e+06	0.00989906	1.37194	1.76895	0.12934	1.03196	651.786	748.215	123.794	0	0
180	3.51602e+06	5.37067e+06	Reutlingen	0	12.5789	0	0.21978	0.19774	0.205882	0.215686	1671	898104	0.00809342	1.23563	1.5396	0.120979	1.29265	145.086	306.961	11.1803	0	0
181	3.54221e+06	5.38994e+06	Zell unter Aichelberg	1	2.29357	2	0.266667	0.291667	0	0.297297	2412.2	262210	0.0205352	2.1257	2.71429	0.101889	1.52475	67.082	292.104	133.417	0	0
182	3.53235e+06	5.3918e+06	Kirchheim unter Teck	0	3.88469	3	0.181818	0.241379	0.181818	0.245098	2407.9	176278	0.0145955	1.22208	1.69769	0.119627	1.30893	172.409	116.726	116.726	0	0
183	3.53187e+06	5.38665e+06	Dettingen unter Teck	0	7.37098	3	0.2	0.049296	0	0.107692	1661.3	1.70997e+06	0.00989906	1.37194	1.76895	0.12934	1.03196	945.859	1763.43	20	0	0
184	3.5579e+06	5.39172e+06	Gingen an der Fils	0	0.702015	2	0.25	0.588235	0	0.535714	2654.1	38739.9	0.0209438	1.1043	1.56275	0.127738	1.25	20	531.154	15.8114	0	0
185	3.52644e+06	5.38196e+06	Frickenhausen	0	5.14244	3	0.125	0.076923	0.5	0.054054	1757	1.34387e+06	0.00860131	1.19047	1.7225	0.103565	1.05882	712.127	1110.86	28.2843	0	0
186	3.50347e+06	5.36212e+06	Mössingen	1	2.85418	0	0.304348	0.11465	0	0.151316	28226.3	249772	0.0178124	1.60177	2.13591	0.0976952	1.05316	94.8683	475.657	91.7878	0	0
187	3.51655e+06	5.36853e+06	Pfullingen	1	1.06445	3	0.363636	0.576923	0.285714	0.567568	78337.6	298858	0.0111596	1.16265	1.70163	0.117938	1.10118	0	330.189	97.0824	0	0
188	3.50696e+06	5.3642e+06	Mössingen	0	8.47083	3	0.304348	0.11465	0	0.151316	780.1	373172	0.0131412	1.60177	2.13591	0.0976952	1.05316	293.981	463.816	236.008	0	0
189	3.50589e+06	5.36541e+06	Nehren	0	5.20326	3	0	0	0	0	90588.3	1.29779e+06	0.0060432	1.69551	2.29424	0.103814	1.45652	296.015	595.189	28.2843	0	0
190	3.52946e+06	5.38184e+06	Beuren	0	3.65539	3	0.076923	0.333333	0.333333	0.195652	1752.2	333570	0.0172854	1.14684	1.5569	0.11726	1.02703	26.9258	222.767	35	0	0
191	3.51004e+06	5.36769e+06	Reutlingen	0	3.23389	2	0.21978	0.19774	0.205882	0.215686	5781.1	319415	0.00880317	1.23563	1.5396	0.120979	1.29265	263.866	443.847	109.659	0	0
192	3.5421e+06	5.38965e+06	Zell unter Aichelberg	1	3.0666	0	0.266667	0.291667	0	0.297297	50169.1	262210	0.0205352	2.1257	2.71429	0.101889	1.52475	251.098	5	5	0	0
193	3.52561e+06	5.37612e+06	Dettingen an der Erms	0	8.44608	3	0.230769	0.166667	1	0.159091	2578	1.10291e+06	0.0123476	1.25849	1.75538	0.113123	1.88725	281.824	155.322	18.0278	0	0
194	3.54983e+06	5.39454e+06	Göppingen	0	4.78125	0	0.245902	0.57377	0.315789	0.36875	411244	504978	0.0167878	1.02208	1.4472	0.138668	1.15129	0	393.573	0	0	0
195	3.53821e+06	5.38398e+06	Bissingen an der Teck	1	7.26745	3	0.333333	0.212766	0.5	0.254237	3103.3	210695	0.0113736	1.35031	1.68719	0.114481	0.989418	1116.45	926.674	92.1954	0	1
196	3.54852e+06	5.39079e+06	Heiningen	1	4.43265	3	0.185185	0.526316	1	0.348837	3010.4	20432.3	0.0372378	1.53551	2.04153	0.103488	1.07647	274.591	310.483	26.9258	0	0
197	3.51595e+06	5.36898e+06	Pfullingen	1	15.0091	0	0.363636	0.576923	0.285714	0.567568	1353.5	349775	0.0184245	1.16265	1.70163	0.117938	1.10118	0	230.489	31.6228	0	0
198	3.52243e+06	5.37615e+06	Metzingen	0	4.46034	2	0.2	0.214953	0.428571	0.165138	724.8	198916	0.0294673	1.18686	1.56641	0.121267	1.33648	343.548	237.171	124.197	0	0
199	3.51539e+06	5.37051e+06	Reutlingen	1	18.7358	0	0.21978	0.19774	0.205882	0.215686	1320.2	898104	0.00809342	1.23563	1.5396	0.120979	1.29265	0	950.802	40	0	0
200	3.55917e+06	5.38995e+06	Kuchen	1	7.60359	3	0.333333	1	0	0.6	3831.5	2732.32	0.10392	1.02878	1.52941	0.11358	1.13072	134.629	841.858	89.4427	0	0
201	3.53868e+06	5.39044e+06	Ohmden	0	4.06486	3	0.5	0.103448	0	0.148148	895.4	584209	0.0130428	1.41308	2.06513	0.102155	1.23529	328.824	531.06	54.0833	0	0
202	3.49735e+06	5.36232e+06	Bodelshausen	0	12.3886	0	0.5	0.037037	0	0.25	1597.7	165859	0.0153032	1.62158	2.06108	0.103155	1.18996	166.433	501.199	216.91	0	0
203	3.53437e+06	5.38249e+06	Lenningen	0	7.87509	3	0.277778	0.221311	0	0.288288	907.2	2.05861e+06	0.00932867	1.09145	1.55231	0.106074	0.965142	242.539	712.215	258.118	0	0
204	3.52866e+06	5.38168e+06	Beuren	0	9.49733	3	0.076923	0.333333	0.333333	0.195652	757.8	44977.6	0.0250465	1.14684	1.5569	0.11726	1.02703	369.628	488.083	55	0	0
205	3.51108e+06	5.36688e+06	Reutlingen	1	7.06616	0	0.21978	0.19774	0.205882	0.215686	2925.8	286101	0.0129011	1.23563	1.5396	0.120979	1.29265	0	40	31.6228	0	0
206	3.53576e+06	5.38307e+06	Bissingen an der Teck	0	12.9093	3	0.333333	0.212766	0.5	0.254237	2034.9	1.06197e+06	0.0117425	1.35031	1.68719	0.114481	0.989418	1064.25	1408.52	276.632	0	1
207	3.51974e+06	5.37775e+06	Metzingen	1	1.20388	0	0.2	0.214953	0.428571	0.165138	556.8	2000.38	0.127685	1.18686	1.56641	0.121267	1.33648	5	140.89	30.4138	0	0
208	3.50982e+06	5.37199e+06	Kusterdingen	0	10.1129	3	0.259259	0.168675	1	0.153226	75994	774234	0.0129779	1.39645	1.80254	0.10766	1.5061	428.632	795	338.711	0	0
209	3.55876e+06	5.38833e+06	Kuchen	0	9.55464	3	0.333333	1	0	0.6	1477.1	1.18824e+06	0.0115027	1.02878	1.52941	0.11358	1.13072	195.256	664.68	120	0	0
210	3.52521e+06	5.38068e+06	Kohlberg	0	16.2824	3	0.25	0.076923	0	0.035714	1836.1	1.20814e+06	0.013945	1.33489	1.88101	0.109253	1.40323	51.4781	411.4	38.0789	0	0
211	3.53259e+06	5.39369e+06	Wernau (Neckar)	0	20.4274	3	0.285714	0.214286	0	0.384615	1070.7	41948.8	0.0275295	0.987809	1.53707	0.0834862	1.16606	833.382	753.077	266.13	0	0
212	3.53901e+06	5.39398e+06	Schlierbach	1	1.68089	3	0	0.333333	0	0.166667	1284.5	121258	0.0258702	1.39391	2.01306	0.0852391	1.14667	472.467	152.643	152.643	0	0
213	3.5346e+06	5.39308e+06	Notzingen	1	6.26391	0	0.2	0.16	0	0.181818	713.1	31776.8	0.0246192	1.58633	2.37363	0.106287	1.20792	0	160	25	0	0
214	3.51592e+06	5.36823e+06	Pfullingen	0	7.19327	3	0.363636	0.576923	0.285714	0.567568	6784.8	520492	0.0100736	1.16265	1.70163	0.117938	1.10118	223.607	91.9239	91.9239	0	0
215	3.50602e+06	5.36566e+06	Nehren	0	6.52508	0	0	0	0	0	16899.9	1.29779e+06	0.0060432	1.69551	2.29424	0.103814	1.45652	235.85	552.177	0	0	0
216	3.53435e+06	5.39146e+06	Kirchheim unter Teck	1	9.51251	3	0.181818	0.241379	0.181818	0.245098	6210.1	189015	0.0181657	1.22208	1.69769	0.119627	1.30893	368.409	514.806	58.3095	0	0
217	3.54011e+06	5.38313e+06	Weilheim an der Teck	0	5.08143	3	0.297297	0.193798	0.230769	0.204545	1813.2	1.48249e+06	0.00924149	1.28113	1.82018	0.108577	1.03917	416.773	190	190	0	0
218	3.5018e+06	5.36159e+06	Mössingen	0	2.98436	3	0.304348	0.11465	0	0.151316	54355.2	581561	0.0200854	1.60177	2.13591	0.0976952	1.05316	141.421	647.341	28.2843	0	0
219	3.53235e+06	5.38343e+06	Owen	0	7.4332	3	0.133333	0.47619	1	0.354167	5988.3	1.39443e+06	0.0107842	1.31243	1.74632	0.117756	1.05	550.727	352.881	150	0	0
220	3.55846e+06	5.39365e+06	Donzdorf	0	10.47	3	0.327273	0.537037	0	0.479592	3759.6	48499.2	0.0223242	1.1454	1.8843	0.103731	1.31707	130	874.714	90	0	0
221	3.49731e+06	5.36241e+06	Bodelshausen	0	9.82784	0	0.5	0.037037	0	0.25	446.2	165859	0.0153032	1.62158	2.06108	0.103155	1.18996	264.197	499.049	192.094	0	0
222	3.5497e+06	5.39469e+06	Göppingen	0	9.44333	0	0.245902	0.57377	0.315789	0.36875	411244	504978	0.0167878	1.02208	1.4472	0.138668	1.15129	0	227.706	25	0	0
223	3.52491e+06	5.37859e+06	Dettingen an der Erms	0	11.4964	3	0.230769	0.166667	1	0.159091	1549	2.35355e+06	0.00791344	1.25849	1.75538	0.113123	1.88725	395	469.521	422.641	0	0
224	3.52235e+06	5.38353e+06	Großbettlingen	0	3.28648	3	0.333333	0.222222	0	0.25	1899	109525	0.0177061	1.73035	2.47265	0.0858525	1.60976	131.244	187.883	150.416	0	0
225	3.50527e+06	5.3645e+06	Nehren	0	6.17727	3	0	0	0	0	2815.7	1.29779e+06	0.0060432	1.69551	2.29424	0.103814	1.45652	341.321	234.307	234.307	0	0
226	3.52856e+06	5.37923e+06	Neuffen	0	14.7786	3	0.333333	0.326531	0.333333	0.222222	237.3	3781.23	0.0652961	1.28788	1.79529	0.111786	1.13303	138.293	92.1954	92.1954	0	0
227	3.52257e+06	5.37802e+06	Metzingen	0	5.00526	3	0.2	0.214953	0.428571	0.165138	1811	2.35355e+06	0.00791344	1.18686	1.56641	0.121267	1.33648	192.094	559.732	30.4138	0	0
228	3.52537e+06	5.37762e+06	Dettingen an der Erms	0	4.09489	0	0.230769	0.166667	1	0.159091	701.4	2.35355e+06	0.00791344	1.25849	1.75538	0.113123	1.88725	0	667.083	0	0	0
229	3.53173e+06	5.3917e+06	Kirchheim unter Teck	0	24.175	3	0.181818	0.241379	0.181818	0.245098	2697	304064	0.0173842	1.22208	1.69769	0.119627	1.30893	123.491	314.086	155.081	0	0
230	3.5505e+06	5.3938e+06	Göppingen	0	6.22677	3	0.245902	0.57377	0.315789	0.36875	5052.2	504978	0.0167878	1.02208	1.4472	0.138668	1.15129	234.307	257.391	46.0977	0	0
231	3.53273e+06	5.38448e+06	Owen	0	16.769	3	0.133333	0.47619	1	0.354167	293.4	1.39443e+06	0.0107842	1.31243	1.74632	0.117756	1.05	230.054	480	161.941	0	0
232	3.54163e+06	5.38699e+06	Weilheim an der Teck	1	15.5094	5	0.297297	0.193798	0.230769	0.204545	117377	35373	0.0300813	1.28113	1.82018	0.108577	1.03917	778.332	1239.07	113.137	0	0
233	3.53339e+06	5.38021e+06	Lenningen	0	14.2757	0	0.277778	0.221311	0	0.288288	0	296509	0.0134553	1.09145	1.55231	0.106074	0.965142	607.557	133.417	133.417	0	1
234	3.50381e+06	5.36507e+06	Ofterdingen	0	5.35264	3	0.363636	0.076923	1	0.142857	1510.8	239498	0.0229242	1.64931	2.09688	0.10547	0.946809	459.048	454.863	351.639	0	0
235	3.51724e+06	5.36883e+06	Pfullingen	0	0.645511	3	0.363636	0.576923	0.285714	0.567568	10876.1	1.02441e+06	0.00879794	1.16265	1.70163	0.117938	1.10118	58.5235	178.676	87.3212	0	0
236	3.53543e+06	5.39122e+06	Kirchheim unter Teck	0	3.54745	3	0.181818	0.241379	0.181818	0.245098	1340.3	96536.3	0.0231511	1.22208	1.69769	0.119627	1.30893	544.266	156.605	139.463	0	0
237	3.51955e+06	5.38361e+06	Altdorf	1	4.4525	2	0.6	0.04	0	0.142857	2164.3	219352	0.0200933	2.09142	2.66667	0.0938375	1.67647	369.628	235.372	5	0	0
238	3.51617e+06	5.37674e+06	Reutlingen	0	10.6732	3	0.21978	0.19774	0.205882	0.215686	829.6	111588	0.0198436	1.23563	1.5396	0.120979	1.29265	90	504.009	67.2681	0	0
239	3.53162e+06	5.38997e+06	Kirchheim unter Teck	1	6.86118	0	0.181818	0.241379	0.181818	0.245098	1731.3	36865.3	0.0298009	1.22208	1.69769	0.119627	1.30893	0	323.303	11.1803	0	0
240	3.53514e+06	5.38521e+06	Bissingen an der Teck	1	10.2579	3	0.333333	0.212766	0.5	0.254237	1335.6	1.06197e+06	0.0117425	1.35031	1.68719	0.114481	0.989418	879.673	1047.02	199.123	0	1
241	3.50389e+06	5.36506e+06	Ofterdingen	1	5.59138	3	0.363636	0.076923	1	0.142857	1510.8	239498	0.0229242	1.64931	2.09688	0.10547	0.946809	532.541	467.68	299.666	0	0
242	3.50687e+06	5.37376e+06	Kusterdingen	1	6.01528	2	0.259259	0.168675	1	0.153226	1218.8	51915.4	0.0246001	1.39645	1.80254	0.10766	1.5061	127.475	630.179	180.624	0	0
243	3.50407e+06	5.36175e+06	Mössingen	0	11.4929	4	0.304348	0.11465	0	0.151316	52931.8	1.71355e+06	0.0133141	1.60177	2.13591	0.0976952	1.05316	441.277	1135.4	236.485	0	1
244	3.54883e+06	5.39468e+06	Göppingen	0	4.11978	0	0.245902	0.57377	0.315789	0.36875	1577.2	521299	0.0169237	1.02208	1.4472	0.138668	1.15129	529.74	465.967	20	0	0
245	3.55346e+06	5.39366e+06	Eislingen/ Fils	1	6.13498	3	0.225	0.75	0.6	0.395833	21357.3	43098	0.0218803	1.10179	1.50558	0.120292	1.10272	737.902	25	25	0	0
246	3.51971e+06	5.382e+06	Bempflingen	1	2.68014	0	0.333333	0.363636	1	0.272727	603	319527	0.0177893	1.26159	1.79849	0.0983425	1.38889	0	221.416	18.0278	0	0
247	3.53222e+06	5.38875e+06	Kirchheim unter Teck	1	3.91076	2	0.181818	0.241379	0.181818	0.245098	4785.4	73257.2	0.0154858	1.22208	1.69769	0.119627	1.30893	476.681	230.054	120.416	0	0
248	3.53188e+06	5.39435e+06	Wernau (Neckar)	0	8.06928	3	0.285714	0.214286	0	0.384615	1079.4	88493.4	0.0156843	0.987809	1.53707	0.0834862	1.16606	278.927	495	67.082	0	0
249	3.52451e+06	5.37634e+06	Dettingen an der Erms	0	6.52044	3	0.230769	0.166667	1	0.159091	1681.2	1.10291e+06	0.0123476	1.25849	1.75538	0.113123	1.88725	419.076	275	114.018	0	0
250	3.52898e+06	5.38055e+06	Beuren	0	13.0282	3	0.076923	0.333333	0.333333	0.195652	4072.2	149960	0.025762	1.14684	1.5569	0.11726	1.02703	242.332	403.299	107.355	0	0
251	3.54272e+06	5.39359e+06	Uhingen	1	14.3186	4	0.380952	0.264706	0.8	0.318841	3705.2	5720.25	0.0628502	1.16457	1.74023	0.104612	1.14191	393.732	564.646	418.36	0	0
252	3.54759e+06	5.39339e+06	Heiningen	0	8.04963	2	0.185185	0.526316	1	0.348837	49290	156470	0.0228275	1.53551	2.04153	0.103488	1.07647	995.314	162.788	69.4622	0	0
253	3.53874e+06	5.38594e+06	Weilheim an der Teck	0	3.72567	3	0.297297	0.193798	0.230769	0.204545	1302.9	43554.8	0.0346208	1.28113	1.82018	0.108577	1.03917	170.074	400	0	0	0
254	3.53278e+06	5.38644e+06	Dettingen unter Teck	0	4.1119	0	0.2	0.049296	0	0.107692	2724.6	1.70997e+06	0.00989906	1.37194	1.76895	0.12934	1.03196	297.321	850	42.72	0	0
255	3.53251e+06	5.38441e+06	Owen	0	8.51844	3	0.133333	0.47619	1	0.354167	1544.5	1.39443e+06	0.0107842	1.31243	1.74632	0.117756	1.05	386.846	693.542	156.205	0	0
256	3.54222e+06	5.38226e+06	Neidlingen	0	7.87271	3	0.2	0.157143	1	0.114286	1912.5	124359	0.0160526	1.31936	1.78261	0.10745	0.909091	67.082	196.087	101.242	0	0
257	3.55616e+06	5.39172e+06	Gingen an der Fils	0	6.54542	3	0.25	0.588235	0	0.535714	1242.7	544352	0.0179697	1.1043	1.56275	0.127738	1.25	970.013	736.088	736.088	0	0
258	3.51937e+06	5.37089e+06	Eningen unter Achalm	0	8.4863	3	0.388889	0.6	0.4	0.392857	781.9	538420	0.0157695	1.29455	1.67437	0.110704	1.02949	172.047	760.016	40	0	0
259	3.55887e+06	5.3909e+06	Gingen an der Fils	1	13.775	3	0.25	0.588235	0	0.535714	1607.1	482787	0.0230543	1.1043	1.56275	0.127738	1.25	458.53	1030.78	333.654	0	0
260	3.54665e+06	5.3993e+06	Rechberghausen	1	7.19315	0	0.454545	0.5	0	0.545455	463	20286.3	0.0549499	1.17103	1.82626	0.112584	1.18	0	303.191	18.0278	0	0
261	3.51212e+06	5.37386e+06	Reutlingen	1	11.9922	3	0.21978	0.19774	0.205882	0.215686	180805	80034	0.0238469	1.23563	1.5396	0.120979	1.29265	39.0512	350.036	60.208	0	0
262	3.51746e+06	5.37374e+06	Reutlingen	0	5.21957	0	0.21978	0.19774	0.205882	0.215686	1627.5	851648	0.00670136	1.23563	1.5396	0.120979	1.29265	206.155	35	0	0	0
263	3.50434e+06	5.36201e+06	Mössingen	0	4.81814	3	0.304348	0.11465	0	0.151316	517.9	1.71355e+06	0.0133141	1.60177	2.13591	0.0976952	1.05316	313.249	1055.96	65	0	0
264	3.50335e+06	5.36198e+06	Mössingen	0	10.8089	3	0.304348	0.11465	0	0.151316	544.4	249772	0.0178124	1.60177	2.13591	0.0976952	1.05316	40.3113	499.525	46.0977	0	0
265	3.53019e+06	5.39305e+06	Wendlingen am Neckar	0	3.49075	2	0.357143	0.071429	0.333333	0.375	2055.9	23123.4	0.0270706	1.17744	1.7408	0.0861055	1.28011	552.11	1124.2	99.6243	0	0
266	3.54573e+06	5.39772e+06	Göppingen	0	5.27623	3	0.245902	0.57377	0.315789	0.36875	2426.7	175505	0.0147344	1.02208	1.4472	0.138668	1.15129	107.703	223.886	132.382	0	0
267	3.54054e+06	5.38691e+06	Weilheim an der Teck	0	5.03584	3	0.297297	0.193798	0.230769	0.204545	1624.1	421013	0.0168905	1.28113	1.82018	0.108577	1.03917	111.803	548.019	70	0	0
268	3.50399e+06	5.3618e+06	Mössingen	0	6.51079	3	0.304348	0.11465	0	0.151316	1678.7	1.71355e+06	0.0133141	1.60177	2.13591	0.0976952	1.05316	368.409	1046.37	147.139	0	1
269	3.55213e+06	5.38975e+06	Schlat	0	7.81736	3	0.5	0.363636	0	0.361111	4765	4153.35	0.0789536	1.21365	1.90775	0.123203	1.17333	535.77	291.076	291.076	0	0
270	3.53921e+06	5.38419e+06	Weilheim an der Teck	0	14.9272	3	0.297297	0.193798	0.230769	0.204545	3300.6	437760	0.0135106	1.28113	1.82018	0.108577	1.03917	463.276	855.935	158.824	0	0
271	3.53972e+06	5.38498e+06	Weilheim an der Teck	0	7.42995	3	0.297297	0.193798	0.230769	0.204545	1437.2	1.55086e+06	0.00669018	1.28113	1.82018	0.108577	1.03917	928.036	692.261	200	1	0
272	3.53271e+06	5.39309e+06	Notzingen	0	4.25221	3	0.2	0.16	0	0.181818	667.1	227464	0.0161938	1.58633	2.37363	0.106287	1.20792	556.821	550.568	429.913	0	0
273	3.52487e+06	5.37864e+06	Neuffen	0	13.2953	0	0.333333	0.326531	0.333333	0.222222	993.6	2.35355e+06	0.00791344	1.28788	1.79529	0.111786	1.13303	339.89	439.118	364.005	0	0
274	3.5023e+06	5.36924e+06	Dußlingen	0	1.6504	2	0.2	0.128205	0	0.090909	2263.9	397964	0.0101867	1.22642	1.77338	0.102978	0.989209	1543.5	2310	611.739	0	0
275	3.54657e+06	5.39142e+06	Göppingen	1	3.60307	3	0.245902	0.57377	0.315789	0.36875	6369.3	2877.87	0.102206	1.02208	1.4472	0.138668	1.15129	531.836	355.598	335.336	0	0
276	3.53521e+06	5.3796e+06	Lenningen	1	13.6341	0	0.277778	0.221311	0	0.288288	0	13360.4	0.0577103	1.09145	1.55231	0.106074	0.965142	630.258	635.708	635.708	1	0
277	3.53302e+06	5.38663e+06	Dettingen unter Teck	0	5.27618	3	0.2	0.049296	0	0.107692	546.1	1.70997e+06	0.00989906	1.37194	1.76895	0.12934	1.03196	87.3212	620	76.1577	0	0
278	3.54671e+06	5.39321e+06	Heiningen	1	6.43985	3	0.185185	0.526316	1	0.348837	8057.1	9711.45	0.0498165	1.53551	2.04153	0.103488	1.07647	557.001	639.727	191.442	0	0
279	3.53807e+06	5.39172e+06	Schlierbach	0	1.07193	3	0	0.333333	0	0.166667	3023.9	440253	0.01217	1.39391	2.01306	0.0852391	1.14667	841.264	833.142	25	0	0
280	3.53248e+06	5.39139e+06	Kirchheim unter Teck	0	19.5261	4	0.181818	0.241379	0.181818	0.245098	2486.7	304064	0.0173842	1.22208	1.69769	0.119627	1.30893	125	85.44	85.44	0	0
281	3.51845e+06	5.37313e+06	Eningen unter Achalm	0	11.9189	3	0.388889	0.6	0.4	0.392857	7132.1	47796.3	0.0229583	1.29455	1.67437	0.110704	1.02949	502.842	997.823	210.772	0	0
282	3.52525e+06	5.37825e+06	Dettingen an der Erms	0	14.7316	3	0.230769	0.166667	1	0.159091	78.6	2.35355e+06	0.00791344	1.25849	1.75538	0.113123	1.88725	502.494	730.513	516.551	0	0
283	3.54739e+06	5.39421e+06	Göppingen	1	8.67696	3	0.245902	0.57377	0.315789	0.36875	2980.5	261917	0.0182301	1.02208	1.4472	0.138668	1.15129	257.391	542.794	35	0	0
284	3.51597e+06	5.37025e+06	Pfullingen	0	14.4563	0	0.363636	0.576923	0.285714	0.567568	867.7	898104	0.00809342	1.16265	1.70163	0.117938	1.10118	161.4	445.112	111.018	0	0
285	3.51299e+06	5.37178e+06	Reutlingen	0	1.16367	3	0.21978	0.19774	0.205882	0.215686	1679	597842	0.0117804	1.23563	1.5396	0.120979	1.29265	413.824	968.052	53.1507	0	0
286	3.53552e+06	5.38126e+06	Lenningen	0	14.6261	0	0.277778	0.221311	0	0.288288	0	1.54264e+06	0.0133674	1.09145	1.55231	0.106074	0.965142	664.417	1337.76	431.335	0	0
287	3.54823e+06	5.38947e+06	Gammelshausen	1	3.14321	0	0.25	0.5	0	0.4375	829.3	21254	0.0436295	2.12843	2.98473	0.0807799	1.33333	0	211.009	5	0	0
288	3.52716e+06	5.38095e+06	Neuffen	0	13.1165	3	0.333333	0.326531	0.333333	0.222222	9691	1.20814e+06	0.013945	1.28788	1.79529	0.111786	1.13303	76.1577	625	5	0	0
289	3.51754e+06	5.38146e+06	Reutlingen	0	10.9631	3	0.21978	0.19774	0.205882	0.215686	2608.4	127514	0.0122766	1.23563	1.5396	0.120979	1.29265	384.187	427.551	192.419	0	0
290	3.53245e+06	5.38379e+06	Owen	0	4.10619	3	0.133333	0.47619	1	0.354167	3221	1.39443e+06	0.0107842	1.31243	1.74632	0.117756	1.05	373.664	677.422	143.178	0	0
291	3.5157e+06	5.37023e+06	Pfullingen	0	12.7831	4	0.363636	0.576923	0.285714	0.567568	1359.6	898104	0.00809342	1.16265	1.70163	0.117938	1.10118	265.047	712.899	204.022	0	0
292	3.55657e+06	5.39054e+06	Gingen an der Fils	0	14.6181	3	0.25	0.588235	0	0.535714	1674.6	6657.13	0.0534885	1.1043	1.56275	0.127738	1.25	972.947	343.548	131.244	0	0
293	3.51767e+06	5.37581e+06	Reutlingen	0	5.42742	3	0.21978	0.19774	0.205882	0.215686	1685.4	99088	0.0182547	1.23563	1.5396	0.120979	1.29265	242.745	679.577	65.192	0	0
294	3.53114e+06	5.39206e+06	Kirchheim unter Teck	1	14.1145	3	0.181818	0.241379	0.181818	0.245098	2095.5	163767	0.0222553	1.22208	1.69769	0.119627	1.30893	286.575	282.843	282.843	0	0
295	3.50679e+06	5.37371e+06	Kusterdingen	0	1.70216	1	0.259259	0.168675	1	0.153226	995.4	51915.4	0.0246001	1.39645	1.80254	0.10766	1.5061	36.4006	717.948	91.9239	0	0
296	3.54109e+06	5.38639e+06	Weilheim an der Teck	1	6.29248	3	0.297297	0.193798	0.230769	0.204545	3228.6	421013	0.0168905	1.28113	1.82018	0.108577	1.03917	305	505.371	145.086	0	0
297	3.53401e+06	5.38545e+06	Dettingen unter Teck	0	11.9988	3	0.2	0.049296	0	0.107692	4589.8	2.05861e+06	0.00932867	1.37194	1.76895	0.12934	1.03196	623.398	573.629	120	0	0
298	3.51665e+06	5.37653e+06	Reutlingen	0	4.73828	3	0.21978	0.19774	0.205882	0.215686	1807.8	19077.6	0.0434974	1.23563	1.5396	0.120979	1.29265	14.1421	268.794	28.2843	0	0
299	3.53205e+06	5.38323e+06	Owen	0	6.18256	3	0.133333	0.47619	1	0.354167	721.5	1.39443e+06	0.0107842	1.31243	1.74632	0.117756	1.05	865.014	316.267	11.1803	0	0
300	3.53195e+06	5.3936e+06	Wernau (Neckar)	0	6.8436	3	0.285714	0.214286	0	0.384615	865.6	71285.7	0.0209029	0.987809	1.53707	0.0834862	1.16606	204.022	328.824	136.473	0	0
301	3.5032e+06	5.36884e+06	Dußlingen	0	2.87416	2	0.2	0.128205	0	0.090909	871	8131.2	0.0451503	1.22642	1.77338	0.102978	0.989209	587.069	1380.08	145.344	0	0
302	3.5255e+06	5.37986e+06	Kohlberg	0	5.78341	3	0.25	0.076923	0	0.035714	1163.8	308893	0.0165857	1.33489	1.88101	0.109253	1.40323	65.192	385.389	105.119	0	0
303	3.53227e+06	5.38347e+06	Owen	0	8.28445	3	0.133333	0.47619	1	0.354167	773	1.39443e+06	0.0107842	1.31243	1.74632	0.117756	1.05	610.021	421.545	192.354	0	0
304	3.50292e+06	5.36921e+06	Dußlingen	0	1.44608	3	0.2	0.128205	0	0.090909	1235.8	397964	0.0101867	1.22642	1.77338	0.102978	0.989209	1050.77	1700	283.989	0	0
305	3.53279e+06	5.39374e+06	Notzingen	0	14.0864	3	0.2	0.16	0	0.181818	1037.9	41948.8	0.0275295	1.58633	2.37363	0.106287	1.20792	854.005	555.023	296.015	0	0
306	3.54134e+06	5.38245e+06	Neidlingen	0	20.1795	3	0.2	0.157143	1	0.114286	1344.3	1.48249e+06	0.00924149	1.31936	1.78261	0.10745	0.909091	159.138	330.492	161.012	0	0
307	3.51861e+06	5.37778e+06	Metzingen	0	7.63355	0	0.2	0.214953	0.428571	0.165138	1325.1	761523	0.0136683	1.18686	1.56641	0.121267	1.33648	1090.05	28.2843	5	0	0
308	3.51768e+06	5.37122e+06	Eningen unter Achalm	1	3.39508	0	0.388889	0.6	0.4	0.392857	13970.2	28961.9	0.0263457	1.29455	1.67437	0.110704	1.02949	0	84.8528	45	0	0
309	3.51818e+06	5.37017e+06	Pfullingen	0	7.87139	3	0.363636	0.576923	0.285714	0.567568	935.1	161588	0.0147898	1.16265	1.70163	0.117938	1.10118	489.745	1010.45	154.434	0	0
310	3.50927e+06	5.36898e+06	Gomaringen	0	11.7617	3	0.25	0.196429	0.5	0.155172	787.6	359254	0.0105774	1.48373	1.85863	0.0970857	1.08571	869.037	590	274.591	0	0
311	3.53929e+06	5.38414e+06	Weilheim an der Teck	0	10.9444	3	0.297297	0.193798	0.230769	0.204545	1573.4	437760	0.0135106	1.28113	1.82018	0.108577	1.03917	399.061	770.146	88.6002	0	0
312	3.53465e+06	5.39005e+06	Kirchheim unter Teck	1	2.57122	0	0.181818	0.241379	0.181818	0.245098	660.6	185513	0.0135172	1.22208	1.69769	0.119627	1.30893	0	351.07	10	0	0
313	3.53278e+06	5.3928e+06	Notzingen	0	4.72551	3	0.2	0.16	0	0.181818	1724.8	227464	0.0161938	1.58633	2.37363	0.106287	1.20792	381.608	272.855	272.855	0	0
314	3.51108e+06	5.36663e+06	Reutlingen	1	15.2729	0	0.21978	0.19774	0.205882	0.215686	721.3	286101	0.0129011	1.23563	1.5396	0.120979	1.29265	0	45	31.6228	0	0
315	3.53414e+06	5.38345e+06	Owen	0	11.0138	3	0.133333	0.47619	1	0.354167	413.9	2.05861e+06	0.00932867	1.31243	1.74632	0.117756	1.05	375.133	277.714	277.714	0	0
316	3.50594e+06	5.36521e+06	Nehren	0	1.5503	3	0	0	0	0	1055.3	1.29779e+06	0.0060432	1.69551	2.29424	0.103814	1.45652	473.814	751.681	71.0634	0	0
317	3.50296e+06	5.36922e+06	Dußlingen	0	1.78048	3	0.2	0.128205	0	0.090909	1737.2	397964	0.0101867	1.22642	1.77338	0.102978	0.989209	1021.2	1650	270.416	0	0
318	3.5345e+06	5.38223e+06	Lenningen	0	9.61301	3	0.277778	0.221311	0	0.288288	691.8	2.05861e+06	0.00932867	1.09145	1.55231	0.106074	0.965142	181.108	751.332	195.064	0	0
319	3.52669e+06	5.38156e+06	Neuffen	0	9.08419	3	0.333333	0.326531	0.333333	0.222222	1228.5	1.34387e+06	0.00860131	1.28788	1.79529	0.111786	1.13303	837.377	973.242	55	0	0
320	3.53557e+06	5.39097e+06	Kirchheim unter Teck	0	5.82074	3	0.181818	0.241379	0.181818	0.245098	2281	275546	0.0139559	1.22208	1.69769	0.119627	1.30893	482.001	435.46	115	0	0
321	3.52028e+06	5.38001e+06	Riederich	1	3.95065	0	0	0	0	0	3330.8	113149	0.0182083	1.66874	2.11765	0.101444	1.31193	0	331.549	5	0	0
322	3.53415e+06	5.38208e+06	Lenningen	0	11.041	3	0.277778	0.221311	0	0.288288	2340.6	1.54264e+06	0.0133674	1.09145	1.55231	0.106074	0.965142	112.361	390	109.202	0	0
323	3.51824e+06	5.36808e+06	Pfullingen	0	14.3623	4	0.363636	0.576923	0.285714	0.567568	801.1	1.02441e+06	0.00879794	1.16265	1.70163	0.117938	1.10118	842.021	502.046	63.6396	0	0
324	3.50873e+06	5.36902e+06	Gomaringen	0	10.4402	3	0.25	0.196429	0.5	0.155172	779.6	359254	0.0105774	1.48373	1.85863	0.0970857	1.08571	330.605	470.239	192.419	0	0
325	3.50707e+06	5.36163e+06	Mössingen	0	8.86934	3	0.304348	0.11465	0	0.151316	4663.7	1.71355e+06	0.0133141	1.60177	2.13591	0.0976952	1.05316	574.282	316.228	123.794	0	1
326	3.52162e+06	5.38353e+06	Großbettlingen	1	10.2724	3	0.333333	0.222222	0	0.25	1748.9	4384.04	0.110166	1.73035	2.47265	0.0858525	1.60976	682.367	265.377	22.3607	0	0
327	3.53006e+06	5.38993e+06	Kirchheim unter Teck	1	2.65946	2	0.181818	0.241379	0.181818	0.245098	3158.1	6520.88	0.0691915	1.22208	1.69769	0.119627	1.30893	20	522.733	0	0	0
328	3.5393e+06	5.39038e+06	Ohmden	0	9.02734	3	0.5	0.103448	0	0.148148	1914.5	584209	0.0130428	1.41308	2.06513	0.102155	1.23529	163.783	161.012	161.012	0	0
329	3.52474e+06	5.37827e+06	Dettingen an der Erms	0	18.7417	3	0.230769	0.166667	1	0.159091	972.7	2.35355e+06	0.00791344	1.25849	1.75538	0.113123	1.88725	373.162	241.868	241.868	0	0
330	3.53405e+06	5.38206e+06	Lenningen	0	11.3316	3	0.277778	0.221311	0	0.288288	865.2	1.54264e+06	0.0133674	1.09145	1.55231	0.106074	0.965142	53.8516	290.689	50.9902	0	0
331	3.55238e+06	5.39004e+06	Schlat	0	11.5786	3	0.5	0.363636	0	0.361111	3312	27720	0.0421346	1.21365	1.90775	0.123203	1.17333	492.062	471.01	154.029	0	0
332	3.518e+06	5.36836e+06	Pfullingen	0	8.64268	3	0.363636	0.576923	0.285714	0.567568	1416.1	1.02441e+06	0.00879794	1.16265	1.70163	0.117938	1.10118	575.022	540.37	107.355	0	0
333	3.55918e+06	5.38846e+06	Kuchen	0	8.73009	3	0.333333	1	0	0.6	981.5	1.18824e+06	0.0115027	1.02878	1.52941	0.11358	1.13072	151.822	282.002	179.234	0	0
334	3.54034e+06	5.39681e+06	Ebersbach an der Fils	1	5.92295	2	0.288136	0.571429	0	0.370787	4479.9	125383	0.0266238	1.1282	1.82888	0.0992791	1.14139	104.403	235.372	134.629	0	0
335	3.53424e+06	5.38251e+06	Lenningen	0	11.1612	3	0.277778	0.221311	0	0.288288	302.9	2.05861e+06	0.00932867	1.09145	1.55231	0.106074	0.965142	208.806	598.101	202.608	0	0
336	3.51446e+06	5.37181e+06	Reutlingen	1	12.2698	0	0.21978	0.19774	0.205882	0.215686	2818.3	36753.3	0.0440958	1.23563	1.5396	0.120979	1.29265	0	368.001	35	0	0
337	3.50207e+06	5.36598e+06	Ofterdingen	1	1.93077	3	0.363636	0.076923	1	0.142857	673.6	908719	0.0134922	1.64931	2.09688	0.10547	0.946809	562.005	1197.63	99.6243	0	0
338	3.51038e+06	5.36594e+06	Reutlingen	0	4.35976	0	0.21978	0.19774	0.205882	0.215686	9301.6	483983	0.0103605	1.23563	1.5396	0.120979	1.29265	275	594.811	0	0	0
339	3.50779e+06	5.3733e+06	Kusterdingen	0	1.62587	2	0.259259	0.168675	1	0.153226	1201.7	92062.8	0.0295451	1.39645	1.80254	0.10766	1.5061	130	195.256	30.4138	0	0
340	3.52557e+06	5.37766e+06	Dettingen an der Erms	0	10.2994	3	0.230769	0.166667	1	0.159091	414.2	2.35355e+06	0.00791344	1.25849	1.75538	0.113123	1.88725	11.1803	866.098	47.1699	0	0
341	3.52093e+06	5.38194e+06	Bempflingen	0	5.07813	3	0.333333	0.363636	1	0.272727	2422.1	206858	0.0177282	1.26159	1.79849	0.0983425	1.38889	340.478	476.288	186.682	0	0
342	3.52218e+06	5.37492e+06	Metzingen	0	9.4352	3	0.2	0.214953	0.428571	0.165138	1500.5	227715	0.019749	1.18686	1.56641	0.121267	1.33648	498.723	250.45	181.177	0	0
343	3.53304e+06	5.38232e+06	Owen	0	9.77268	3	0.133333	0.47619	1	0.354167	1159.6	1.39443e+06	0.0107842	1.31243	1.74632	0.117756	1.05	311.006	576.91	322.684	0	0
344	3.5157e+06	5.37864e+06	Reutlingen	1	3.6198	0	0.21978	0.19774	0.205882	0.215686	728.5	261242	0.0157331	1.23563	1.5396	0.120979	1.29265	0	462.223	11.1803	0	0
345	3.53753e+06	5.39697e+06	Ebersbach an der Fils	0	14.1801	3	0.288136	0.571429	0	0.370787	2652	11682	0.0516236	1.1282	1.82888	0.0992791	1.14139	40	180.278	60	0	0
346	3.51068e+06	5.37409e+06	Wannweil	0	10.4723	3	0.5	0.2	0.2	0.166667	71035.8	359132	0.0117938	1.10228	1.56674	0.126792	1.42478	624.76	615.02	33.541	0	0
347	3.5244e+06	5.38574e+06	Nürtingen	0	6.46693	3	0.2	0.22314	0.315789	0.226277	2205.1	124664	0.0288802	1.36016	1.73962	0.12287	1.1157	60.8276	485.927	89.0225	0	0
348	3.53174e+06	5.39437e+06	Wernau (Neckar)	0	4.52704	3	0.285714	0.214286	0	0.384615	1735.2	88493.4	0.0156843	0.987809	1.53707	0.0834862	1.16606	150	360	118.849	0	0
349	3.50713e+06	5.36166e+06	Mössingen	0	23.6269	3	0.304348	0.11465	0	0.151316	3041.8	1.71355e+06	0.0133141	1.60177	2.13591	0.0976952	1.05316	548.931	246.982	55.9017	0	1
350	3.55744e+06	5.39068e+06	Gingen an der Fils	1	7.02868	3	0.25	0.588235	0	0.535714	2135.7	126122	0.0266443	1.1043	1.56275	0.127738	1.25	296.142	337.231	172.409	0	0
351	3.5329e+06	5.38294e+06	Owen	0	6.0077	3	0.133333	0.47619	1	0.354167	2816.6	1.39443e+06	0.0107842	1.31243	1.74632	0.117756	1.05	20.6155	105.475	5	0	0
352	3.5326e+06	5.38535e+06	Dettingen unter Teck	0	9.64599	3	0.2	0.049296	0	0.107692	1013.3	1.70997e+06	0.00989906	1.37194	1.76895	0.12934	1.03196	780.801	781.025	172.409	0	0
353	3.5188e+06	5.38183e+06	Bempflingen	0	15.805	3	0.333333	0.363636	1	0.272727	1051.7	269162	0.020936	1.26159	1.79849	0.0983425	1.38889	219.545	208.626	208.626	0	0
354	3.50452e+06	5.36128e+06	Mössingen	0	15.7366	0	0.304348	0.11465	0	0.151316	4937.5	1.71355e+06	0.0133141	1.60177	2.13591	0.0976952	1.05316	1015.6	1758.2	0	0	1
355	3.54191e+06	5.38361e+06	Neidlingen	0	8.8265	3	0.2	0.157143	1	0.114286	197704	881477	0.0160684	1.31936	1.78261	0.10745	0.909091	476.366	760.543	121.758	0	0
356	3.52068e+06	5.37287e+06	Eningen unter Achalm	0	21.9791	0	0.388889	0.6	0.4	0.392857	0	205543	0.0124355	1.29455	1.67437	0.110704	1.02949	634.133	135.093	135.093	0	0
357	3.50735e+06	5.36762e+06	Gomaringen	0	10.0448	3	0.25	0.196429	0.5	0.155172	910	276983	0.0102789	1.48373	1.85863	0.0970857	1.08571	38.0789	550	36.4006	0	0
358	3.52847e+06	5.39015e+06	Oberboihingen	0	17.8063	4	0.285714	0.357143	0	0.444444	7924	8238.12	0.0622534	1.40177	1.84244	0.101036	1.11644	515	757.842	29.1548	0	0
359	3.5385e+06	5.38433e+06	Bissingen an der Teck	0	3.52079	3	0.333333	0.212766	0.5	0.254237	1050.4	210695	0.0113736	1.35031	1.68719	0.114481	0.989418	1022.41	1230.01	71.5891	0	1
360	3.53782e+06	5.39126e+06	Schlierbach	1	8.82949	3	0	0.333333	0	0.166667	1120.4	440253	0.01217	1.39391	2.01306	0.0852391	1.14667	1261.12	1080.86	33.541	0	0
361	3.55826e+06	5.3924e+06	Gingen an der Fils	0	7.03142	3	0.25	0.588235	0	0.535714	1567.8	51150.2	0.0271677	1.1043	1.56275	0.127738	1.25	438.321	1251.6	207.183	0	0
362	3.5457e+06	5.38989e+06	Boll	1	1.94487	0	0.285714	2.5	1	0.538462	2300.5	68412.9	0.0244689	1.35042	1.91502	0.160651	1.21591	0	625.72	28.2843	0	0
363	3.50469e+06	5.36212e+06	Mössingen	1	7.33747	3	0.304348	0.11465	0	0.151316	1838.4	1.71355e+06	0.0133141	1.60177	2.13591	0.0976952	1.05316	232.002	1172.39	250.45	0	0
364	3.51768e+06	5.37398e+06	Reutlingen	0	7.05567	3	0.21978	0.19774	0.205882	0.215686	8306.4	851648	0.00670136	1.23563	1.5396	0.120979	1.29265	438.321	155	30.4138	0	0
365	3.55704e+06	5.39149e+06	Gingen an der Fils	0	13.7225	3	0.25	0.588235	0	0.535714	3486.1	544352	0.0179697	1.1043	1.56275	0.127738	1.25	174.428	248.395	175	0	0
366	3.51757e+06	5.38119e+06	Reutlingen	1	6.86282	2	0.21978	0.19774	0.205882	0.215686	3606.2	127514	0.0122766	1.23563	1.5396	0.120979	1.29265	177.553	162.788	44.7214	0	0
367	3.52436e+06	5.37816e+06	Neuffen	0	11.1963	3	0.333333	0.326531	0.333333	0.222222	626.2	2.35355e+06	0.00791344	1.28788	1.79529	0.111786	1.13303	396.232	135.831	135.831	0	0
368	3.53239e+06	5.39317e+06	Notzingen	0	9.31376	3	0.2	0.16	0	0.181818	830.8	227464	0.0161938	1.58633	2.37363	0.106287	1.20792	810.015	607.495	267.301	0	0
369	3.52858e+06	5.38178e+06	Beuren	0	3.01544	3	0.076923	0.333333	0.333333	0.195652	6004.6	44977.6	0.0250465	1.14684	1.5569	0.11726	1.02703	403.02	485.489	105	0	0
370	3.54566e+06	5.39761e+06	Göppingen	0	6.75008	3	0.245902	0.57377	0.315789	0.36875	4453.7	175505	0.0147344	1.02208	1.4472	0.138668	1.15129	97.0824	262.011	108.167	0	0
371	3.53501e+06	5.39031e+06	Kirchheim unter Teck	1	2.41669	0	0.181818	0.241379	0.181818	0.245098	381.6	185513	0.0135172	1.22208	1.69769	0.119627	1.30893	0	770.73	18.0278	0	0
372	3.53114e+06	5.38921e+06	Kirchheim unter Teck	1	4.17508	3	0.181818	0.241379	0.181818	0.245098	2424.6	59974.4	0.0285757	1.22208	1.69769	0.119627	1.30893	458.394	247.487	247.487	0	0
373	3.51897e+06	5.38044e+06	Riederich	0	3.6607	3	0	0	0	0	2903.2	28926.8	0.0343114	1.66874	2.11765	0.101444	1.31193	134.536	35	35	0	0
374	3.52663e+06	5.38258e+06	Frickenhausen	0	15.6812	3	0.125	0.076923	0.5	0.054054	338.3	1.34387e+06	0.00860131	1.19047	1.7225	0.103565	1.05882	359.34	604.649	44.7214	0	0
375	3.5429e+06	5.394e+06	Uhingen	1	2.85809	3	0.380952	0.264706	0.8	0.318841	6074.9	22496.9	0.0265198	1.16457	1.74023	0.104612	1.14191	70.1783	152.643	28.2843	0	0
376	3.52391e+06	5.37952e+06	Kohlberg	0	13.635	3	0.25	0.076923	0	0.035714	1408.8	305005	0.0192568	1.33489	1.88101	0.109253	1.40323	322.684	204.022	204.022	0	0
377	3.53307e+06	5.38236e+06	Owen	0	7.81831	3	0.133333	0.47619	1	0.354167	871.6	1.39443e+06	0.0107842	1.31243	1.74632	0.117756	1.05	262.345	521.009	271.662	0	0
378	3.53398e+06	5.38162e+06	Lenningen	0	15.8356	3	0.277778	0.221311	0	0.288288	727.1	1.54264e+06	0.0133674	1.09145	1.55231	0.106074	0.965142	65	230	127.475	0	0
379	3.53424e+06	5.39068e+06	Kirchheim unter Teck	1	5.7107	3	0.181818	0.241379	0.181818	0.245098	1213.2	25344.3	0.0271084	1.22208	1.69769	0.119627	1.30893	71.5891	186.078	10	0	0
380	3.53024e+06	5.38968e+06	Kirchheim unter Teck	1	3.12128	3	0.181818	0.241379	0.181818	0.245098	1590.7	8223.39	0.0530223	1.22208	1.69769	0.119627	1.30893	85	265.047	125.3	0	0
381	3.54585e+06	5.38893e+06	Boll	0	7.84648	3	0.285714	2.5	1	0.538462	3833	27417.9	0.0277179	1.35042	1.91502	0.160651	1.21591	103.078	301.04	135.093	0	0
382	3.5077e+06	5.36448e+06	Mössingen	0	12.7515	2	0.304348	0.11465	0	0.151316	651.9	373172	0.0131412	1.60177	2.13591	0.0976952	1.05316	270.416	320	246.221	0	0
383	3.52615e+06	5.37554e+06	Dettingen an der Erms	0	10.2028	3	0.230769	0.166667	1	0.159091	1355.6	1.10291e+06	0.0123476	1.25849	1.75538	0.113123	1.88725	412.826	60.4152	60.4152	0	0
384	3.55218e+06	5.39053e+06	Schlat	0	4.62997	3	0.5	0.363636	0	0.361111	2355.1	60985.2	0.0356744	1.21365	1.90775	0.123203	1.17333	32.0156	186.078	42.4264	0	0
385	3.51128e+06	5.36727e+06	Reutlingen	0	7.1378	3	0.21978	0.19774	0.205882	0.215686	1143.1	408466	0.0191366	1.23563	1.5396	0.120979	1.29265	121.037	91.9239	39.0512	0	0
386	3.5409e+06	5.38776e+06	Weilheim an der Teck	1	4.42122	0	0.297297	0.193798	0.230769	0.204545	61948.7	1.26914e+06	0.00550867	1.28113	1.82018	0.108577	1.03917	0	275.409	7.07107	0	0
387	3.53852e+06	5.38587e+06	Weilheim an der Teck	1	2.21431	3	0.297297	0.193798	0.230769	0.204545	2359.2	43554.8	0.0346208	1.28113	1.82018	0.108577	1.03917	397.146	480	185.809	0	0
388	3.55885e+06	5.39095e+06	Gingen an der Fils	0	15.1435	3	0.25	0.588235	0	0.535714	2692.8	482787	0.0230543	1.1043	1.56275	0.127738	1.25	425.47	1051.77	364.005	0	0
389	3.51962e+06	5.38401e+06	Altdorf	0	5.12209	3	0.6	0.04	0	0.142857	1819.1	140615	0.0155097	2.09142	2.66667	0.0938375	1.67647	90.1388	105.119	105.119	0	0
390	3.53559e+06	5.3956e+06	Hochdorf	0	8.91673	3	0.052632	0.307692	1	0.129032	1437.7	539415	0.0175797	1.34266	2.08222	0.0941176	1.33333	429.214	574.891	42.72	0	0
391	3.52822e+06	5.37823e+06	Neuffen	0	9.1651	5	0.333333	0.326531	0.333333	0.222222	266336	1.04757e+06	0.0118645	1.28788	1.79529	0.111786	1.13303	737.055	851.954	260	0	0
392	3.55056e+06	5.39422e+06	Göppingen	0	6.01561	3	0.245902	0.57377	0.315789	0.36875	9398.3	504978	0.0167878	1.02208	1.4472	0.138668	1.15129	29.1548	135	58.3095	0	0
393	3.53568e+06	5.38497e+06	Bissingen an der Teck	0	7.42268	3	0.333333	0.212766	0.5	0.254237	2094.5	1.06197e+06	0.0117425	1.35031	1.68719	0.114481	0.989418	364.486	626.997	295	0	1
394	3.53986e+06	5.38489e+06	Weilheim an der Teck	0	8.30096	3	0.297297	0.193798	0.230769	0.204545	2225	1.55086e+06	0.00669018	1.28113	1.82018	0.108577	1.03917	965.66	570.088	81.3941	1	0
395	3.52724e+06	5.37931e+06	Neuffen	0	4.49449	3	0.333333	0.326531	0.333333	0.222222	1835.4	674506	0.0153244	1.28788	1.79529	0.111786	1.13303	104.043	447.465	120.83	0	0
396	3.49925e+06	5.36393e+06	Bodelshausen	0	0	0	0.5	0.037037	0	0.25	0	112193	0.0128379	1.62158	2.06108	0.103155	1.18996	1375.25	1524.63	211.896	0	0
397	3.53253e+06	5.3835e+06	Owen	0	7.48337	3	0.133333	0.47619	1	0.354167	1172.3	1.39443e+06	0.0107842	1.31243	1.74632	0.117756	1.05	366.231	386.167	192.354	0	0
398	3.55495e+06	5.39151e+06	Süßen	0	4.14752	3	0.166667	0.428571	0.333333	0.243243	1794.5	36669.5	0.0292643	1.2209	1.69688	0.108562	1.57604	826.801	870.201	202.608	0	0
399	3.53548e+06	5.38472e+06	Bissingen an der Teck	0	7.04132	3	0.333333	0.212766	0.5	0.254237	5713.1	1.06197e+06	0.0117425	1.35031	1.68719	0.114481	0.989418	502.021	837.929	114.018	0	1
400	3.51131e+06	5.37112e+06	Reutlingen	0	4.14332	3	0.21978	0.19774	0.205882	0.215686	946.9	166750	0.013643	1.23563	1.5396	0.120979	1.29265	261.964	791.107	25.4951	0	0
401	3.54851e+06	5.3954e+06	Göppingen	1	3.1276	0	0.245902	0.57377	0.315789	0.36875	69884.1	521299	0.0169237	1.02208	1.4472	0.138668	1.15129	38.0789	5	10	0	0
402	3.53821e+06	5.3921e+06	Schlierbach	0	2.85161	0	0	0.333333	0	0.166667	12968.1	440253	0.01217	1.39391	2.01306	0.0852391	1.14667	440.596	774.758	5	0	0
403	3.53923e+06	5.38603e+06	Weilheim an der Teck	0	6.22462	3	0.297297	0.193798	0.230769	0.204545	441	1.55086e+06	0.00669018	1.28113	1.82018	0.108577	1.03917	75.6637	323.149	72.8011	1	0
404	3.53711e+06	5.38414e+06	Bissingen an der Teck	0	15.5966	3	0.333333	0.212766	0.5	0.254237	2337.1	534268	0.0160772	1.35031	1.68719	0.114481	0.989418	412.704	133.417	30.4138	0	1
405	3.54459e+06	5.39566e+06	Göppingen	0	0.982493	3	0.245902	0.57377	0.315789	0.36875	1514.2	12828.3	0.0567636	1.02208	1.4472	0.138668	1.15129	727.616	70	70	0	0
406	3.51897e+06	5.37823e+06	Metzingen	0	4.12576	3	0.2	0.214953	0.428571	0.165138	2249.7	761523	0.0136683	1.18686	1.56641	0.121267	1.33648	823.787	261.008	20	0	0
407	3.51995e+06	5.37249e+06	Eningen unter Achalm	0	6.98194	3	0.388889	0.6	0.4	0.392857	90.1	321504	0.0207117	1.29455	1.67437	0.110704	1.02949	96.1769	129.711	129.711	0	0
408	3.51758e+06	5.36847e+06	Pfullingen	0	3.23891	3	0.363636	0.576923	0.285714	0.567568	2932.7	1.02441e+06	0.00879794	1.16265	1.70163	0.117938	1.10118	190.066	118.849	74.3303	1	0
409	3.53218e+06	5.38566e+06	Dettingen unter Teck	0	7.08375	3	0.2	0.049296	0	0.107692	24160.3	1.70997e+06	0.00989906	1.37194	1.76895	0.12934	1.03196	910.838	1260.37	165.68	0	0
410	3.53608e+06	5.38818e+06	Kirchheim unter Teck	1	7.83806	3	0.181818	0.241379	0.181818	0.245098	28116.7	260751	0.0226392	1.22208	1.69769	0.119627	1.30893	614.837	80	90	0	0
411	3.52654e+06	5.38191e+06	Frickenhausen	0	5.52539	3	0.125	0.076923	0.5	0.054054	1076.1	1.34387e+06	0.00860131	1.19047	1.7225	0.103565	1.05882	668.3	1031.56	69.4622	0	0
412	3.51685e+06	5.3792e+06	Reutlingen	1	5.5517	2	0.21978	0.19774	0.205882	0.215686	4724.7	38943.6	0.0231715	1.23563	1.5396	0.120979	1.29265	874.786	82.4621	82.4621	0	0
413	3.55809e+06	5.38849e+06	Kuchen	0	6.63625	3	0.333333	1	0	0.6	4583.2	1.18824e+06	0.0115027	1.02878	1.52941	0.11358	1.13072	306.023	941.077	210.297	0	0
414	3.51772e+06	5.36945e+06	Pfullingen	0	6.76724	3	0.363636	0.576923	0.285714	0.567568	1270.8	1.02441e+06	0.00879794	1.16265	1.70163	0.117938	1.10118	57.0088	513.469	47.1699	0	0
415	3.53275e+06	5.39111e+06	Kirchheim unter Teck	0	0.773981	2	0.181818	0.241379	0.181818	0.245098	3242.3	304064	0.0173842	1.22208	1.69769	0.119627	1.30893	90.1388	158.114	103.078	0	0
416	3.52821e+06	5.38176e+06	Beuren	0	10.0178	4	0.076923	0.333333	0.333333	0.195652	1241.1	45095.8	0.0279418	1.14684	1.5569	0.11726	1.02703	682.422	542.517	237.697	0	0
417	3.5045e+06	5.36407e+06	Mössingen	0	2.4629	3	0.304348	0.11465	0	0.151316	687.2	1.29779e+06	0.0060432	1.60177	2.13591	0.0976952	1.05316	90.1388	167.705	129.711	0	0
418	3.50695e+06	5.36979e+06	Gomaringen	0	2.68012	2	0.25	0.196429	0.5	0.155172	902.2	144596	0.0136777	1.48373	1.85863	0.0970857	1.08571	131.244	71.5891	71.5891	0	0
419	3.51936e+06	5.37856e+06	Metzingen	0	2.95616	3	0.2	0.214953	0.428571	0.165138	3024.8	761523	0.0136683	1.18686	1.56641	0.121267	1.33648	431.567	397.02	216.391	0	0
420	3.55924e+06	5.38839e+06	Kuchen	1	7.88624	3	0.333333	1	0	0.6	7175.9	19070.4	0.0371128	1.02878	1.52941	0.11358	1.13072	190.394	290.689	134.629	0	0
421	3.52235e+06	5.37455e+06	Metzingen	0	4.54092	3	0.2	0.214953	0.428571	0.165138	827.1	586556	0.010557	1.18686	1.56641	0.121267	1.33648	310.846	116.619	45	0	0
422	3.51897e+06	5.38305e+06	Neckartenzlingen	0	11.1496	3	0	0.1	1	0.266667	45342.2	319527	0.0177893	1.30354	1.90761	0.0887945	1.23404	75.6637	478.017	142.302	0	0
423	3.55857e+06	5.38841e+06	Kuchen	0	9.76567	0	0.333333	1	0	0.6	1408.1	1.18824e+06	0.0115027	1.02878	1.52941	0.11358	1.13072	47.4342	745.201	89.0225	0	0
424	3.54119e+06	5.38722e+06	Weilheim an der Teck	0	9.57783	3	0.297297	0.193798	0.230769	0.204545	259280	1.26914e+06	0.00550867	1.28113	1.82018	0.108577	1.03917	286.575	877.852	51.4781	0	0
425	3.5217e+06	5.37645e+06	Metzingen	0	6.09219	3	0.2	0.214953	0.428571	0.165138	1439.4	505116	0.00726691	1.18686	1.56641	0.121267	1.33648	645.078	403.547	53.8516	0	0
426	3.52596e+06	5.38023e+06	Neuffen	0	11.9924	3	0.333333	0.326531	0.333333	0.222222	3171.5	1.20814e+06	0.013945	1.28788	1.79529	0.111786	1.13303	264.008	180.278	88.459	0	0
427	3.52907e+06	5.38063e+06	Beuren	0	7.7832	3	0.076923	0.333333	0.333333	0.195652	51526.8	149960	0.025762	1.14684	1.5569	0.11726	1.02703	201.556	403.051	18.0278	0	0
428	3.5278e+06	5.38191e+06	Frickenhausen	0	10.7747	3	0.125	0.076923	0.5	0.054054	1007.9	249663	0.0175127	1.19047	1.7225	0.103565	1.05882	327.3	155	155	0	0
429	3.5372e+06	5.38401e+06	Bissingen an der Teck	0	4.5812	3	0.333333	0.212766	0.5	0.254237	2499.2	534268	0.0160772	1.35031	1.68719	0.114481	0.989418	543.921	35	35	0	1
430	3.54045e+06	5.3871e+06	Weilheim an der Teck	0	2.57979	3	0.297297	0.193798	0.230769	0.204545	1150.3	421013	0.0168905	1.28113	1.82018	0.108577	1.03917	35.3553	350.036	116.726	0	0
431	3.51753e+06	5.37335e+06	Reutlingen	0	9.96173	3	0.21978	0.19774	0.205882	0.215686	4642	851648	0.00670136	1.23563	1.5396	0.120979	1.29265	302.076	75	5	0	0
432	3.55041e+06	5.39421e+06	Göppingen	0	8.82855	3	0.245902	0.57377	0.315789	0.36875	4214.3	504978	0.0167878	1.02208	1.4472	0.138668	1.15129	152.069	285	156.605	0	0
433	3.51567e+06	5.37072e+06	Reutlingen	0	14.0356	0	0.21978	0.19774	0.205882	0.215686	220.3	898104	0.00809342	1.23563	1.5396	0.120979	1.29265	97.0824	645.174	33.541	0	0
434	3.55206e+06	5.39003e+06	Schlat	1	8.04992	3	0.5	0.363636	0	0.361111	2084.8	15690.1	0.0586863	1.21365	1.90775	0.123203	1.17333	251.247	156.285	127.475	0	0
435	3.53872e+06	5.3901e+06	Ohmden	1	11.7119	3	0.5	0.103448	0	0.148148	971.4	584209	0.0130428	1.41308	2.06513	0.102155	1.23529	10	197.8	14.1421	0	0
436	3.50551e+06	5.36472e+06	Nehren	0	7.65028	3	0	0	0	0	1598.5	1.29779e+06	0.0060432	1.69551	2.29424	0.103814	1.45652	584.059	490.026	22.3607	0	0
437	3.5354e+06	5.38996e+06	Kirchheim unter Teck	0	0.914254	2	0.181818	0.241379	0.181818	0.245098	4847.6	394274	0.0145663	1.22208	1.69769	0.119627	1.30893	219.659	543.162	191.377	0	0
438	3.54833e+06	5.39089e+06	Heiningen	0	1.19152	3	0.185185	0.526316	1	0.348837	4184.3	31887.6	0.0278862	1.53551	2.04153	0.103488	1.07647	63.6396	281.514	10	0	0
439	3.52048e+06	5.38189e+06	Bempflingen	0	3.28854	3	0.333333	0.363636	1	0.272727	796.8	206858	0.0177282	1.26159	1.79849	0.0983425	1.38889	194.165	285.175	11.1803	0	0
440	3.52046e+06	5.37265e+06	Eningen unter Achalm	0	11.2095	3	0.388889	0.6	0.4	0.392857	2951.8	32302.8	0.0378871	1.29455	1.67437	0.110704	1.02949	385	25	14.1421	0	0
441	3.53562e+06	5.38151e+06	Lenningen	0	16.0414	0	0.277778	0.221311	0	0.288288	0	1.54264e+06	0.0133674	1.09145	1.55231	0.106074	0.965142	887.947	1562.08	687.059	0	0
442	3.55673e+06	5.39311e+06	Süßen	1	0.39944	2	0.166667	0.428571	0.333333	0.243243	22794.1	243599	0.019395	1.2209	1.69688	0.108562	1.57604	109.659	449.361	241.299	0	0
443	3.53905e+06	5.38533e+06	Weilheim an der Teck	0	10.2353	3	0.297297	0.193798	0.230769	0.204545	1720.1	1.55086e+06	0.00669018	1.28113	1.82018	0.108577	1.03917	552.381	1013.16	307.002	1	0
444	3.53167e+06	5.39173e+06	Kirchheim unter Teck	0	25.2771	4	0.181818	0.241379	0.181818	0.245098	1922.3	304064	0.0173842	1.22208	1.69769	0.119627	1.30893	131.244	271.708	167.631	0	0
445	3.5048e+06	5.36273e+06	Mössingen	1	2.28535	0	0.304348	0.11465	0	0.151316	550	1.71355e+06	0.0133141	1.60177	2.13591	0.0976952	1.05316	0	721.734	15	0	0
446	3.541e+06	5.38479e+06	Weilheim an der Teck	0	6.86691	3	0.297297	0.193798	0.230769	0.204545	1248.4	416375	0.00954846	1.28113	1.82018	0.108577	1.03917	884.774	442.719	61.8466	0	0
447	3.53625e+06	5.38364e+06	Bissingen an der Teck	0	6.58028	3	0.333333	0.212766	0.5	0.254237	4242.8	534268	0.0160772	1.35031	1.68719	0.114481	0.989418	343.293	821.523	22.3607	0	0
448	3.53784e+06	5.38983e+06	Ohmden	0	7.79918	3	0.5	0.103448	0	0.148148	1660.1	84946	0.0293974	1.41308	2.06513	0.102155	1.23529	284.429	115.974	115.974	1	0
449	3.53382e+06	5.38427e+06	Owen	0	10.1331	3	0.133333	0.47619	1	0.354167	391.1	2.05861e+06	0.00932867	1.31243	1.74632	0.117756	1.05	275.045	272.855	272.855	0	0
450	3.5261e+06	5.3793e+06	Neuffen	0	5.61994	0	0.333333	0.326531	0.333333	0.222222	6689.9	674506	0.0153244	1.28788	1.79529	0.111786	1.13303	814.647	730	0	0	0
451	3.53281e+06	5.38877e+06	Kirchheim unter Teck	0	9.98492	3	0.181818	0.241379	0.181818	0.245098	14540.7	11501.8	0.05203	1.22208	1.69769	0.119627	1.30893	372.156	120.83	129.035	0	0
452	3.552e+06	5.39433e+06	Eislingen/ Fils	0	1.5634	2	0.225	0.75	0.6	0.395833	10214.6	27466.6	0.0312296	1.10179	1.50558	0.120292	1.10272	65	166.208	60.208	0	0
453	3.5037e+06	5.3696e+06	Dußlingen	0	3.95117	3	0.2	0.128205	0	0.090909	1009.8	247311	0.0192261	1.22642	1.77338	0.102978	0.989209	505	952.064	87.3212	0	0
454	3.50688e+06	5.36203e+06	Mössingen	0	10.5413	3	0.304348	0.11465	0	0.151316	4219.7	1.71355e+06	0.0133141	1.60177	2.13591	0.0976952	1.05316	980.778	190.066	14.1421	0	1
455	3.55644e+06	5.39175e+06	Gingen an der Fils	0	5.17506	3	0.25	0.588235	0	0.535714	4608.5	544352	0.0179697	1.1043	1.56275	0.127738	1.25	691.158	604.152	604.152	0	0
456	3.51127e+06	5.37403e+06	Wannweil	0	9.84646	3	0.5	0.2	0.2	0.166667	623.2	38985.3	0.0201431	1.10228	1.56674	0.126792	1.42478	200.562	455.906	31.6228	0	0
457	3.53186e+06	5.38638e+06	Dettingen unter Teck	0	5.93811	3	0.2	0.049296	0	0.107692	3355.2	1.70997e+06	0.00989906	1.37194	1.76895	0.12934	1.03196	1066.77	1731.7	261.63	0	0
458	3.50439e+06	5.36216e+06	Mössingen	0	4.93717	3	0.304348	0.11465	0	0.151316	491.2	1.71355e+06	0.0133141	1.60177	2.13591	0.0976952	1.05316	156.924	984.124	25	0	0
459	3.52532e+06	5.37781e+06	Dettingen an der Erms	0	6.15993	3	0.230769	0.166667	1	0.159091	308.7	2.35355e+06	0.00791344	1.25849	1.75538	0.113123	1.88725	60	666.821	80.7775	0	0
460	3.5237e+06	5.37817e+06	Metzingen	0	11.4997	3	0.2	0.214953	0.428571	0.165138	2754.3	2.35355e+06	0.00791344	1.18686	1.56641	0.121267	1.33648	795.566	796.524	112.805	0	0
461	3.53894e+06	5.38354e+06	Weilheim an der Teck	0	13.7756	3	0.297297	0.193798	0.230769	0.204545	2538.6	1.48249e+06	0.00924149	1.28113	1.82018	0.108577	1.03917	345.615	655.629	269.119	0	0
462	3.51918e+06	5.38368e+06	Neckartenzlingen	0	4.84091	2	0	0.1	1	0.266667	1516.2	219352	0.0200933	1.30354	1.90761	0.0887945	1.23404	265.377	44.7214	44.7214	0	0
463	3.55105e+06	5.39096e+06	Schlat	0	8.36259	3	0.5	0.363636	0	0.361111	8310.6	197289	0.0199119	1.21365	1.90775	0.123203	1.17333	688.84	995.615	66.7083	0	0
464	3.53904e+06	5.38522e+06	Weilheim an der Teck	0	7.20441	3	0.297297	0.193798	0.230769	0.204545	715.6	1.55086e+06	0.00669018	1.28113	1.82018	0.108577	1.03917	659.28	1121.88	248.244	1	0
465	3.53982e+06	5.38394e+06	Weilheim an der Teck	0	29.5461	5	0.297297	0.193798	0.230769	0.204545	387.4	437760	0.0135106	1.28113	1.82018	0.108577	1.03917	183.439	302.324	70.7107	0	0
466	3.52059e+06	5.3724e+06	Eningen unter Achalm	0	9.91725	3	0.388889	0.6	0.4	0.392857	2281.6	321504	0.0207117	1.29455	1.67437	0.110704	1.02949	554.301	295	65.192	0	0
467	3.52129e+06	5.37509e+06	Metzingen	0	13.3924	3	0.2	0.214953	0.428571	0.165138	818.2	9096.23	0.0421474	1.18686	1.56641	0.121267	1.33648	1390.8	680.074	141.51	0	0
468	3.52923e+06	5.3822e+06	Beuren	0	6.96991	3	0.076923	0.333333	0.333333	0.195652	645.2	333570	0.0172854	1.14684	1.5569	0.11726	1.02703	241.506	286.007	53.8516	0	0
469	3.51998e+06	5.37238e+06	Eningen unter Achalm	0	9.92473	3	0.388889	0.6	0.4	0.392857	2488.6	321504	0.0207117	1.29455	1.67437	0.110704	1.02949	158.902	240.52	87.3212	0	0
470	3.51343e+06	5.37207e+06	Reutlingen	1	4.99582	0	0.21978	0.19774	0.205882	0.215686	6081.7	597842	0.0117804	1.23563	1.5396	0.120979	1.29265	0	787.464	49.4975	0	0
471	3.51967e+06	5.37768e+06	Metzingen	0	18.7969	3	0.2	0.214953	0.428571	0.165138	9539.3	28324.7	0.0450895	1.18686	1.56641	0.121267	1.33648	97.0824	103.078	36.4006	0	0
472	3.54154e+06	5.38727e+06	Weilheim an der Teck	0	22.169	4	0.297297	0.193798	0.230769	0.204545	2686	1.26914e+06	0.00550867	1.28113	1.82018	0.108577	1.03917	640.02	1001.25	137.931	0	0
473	3.53107e+06	5.38227e+06	Beuren	0	8.74883	3	0.076923	0.333333	0.333333	0.195652	109359	508268	0.0193484	1.14684	1.5569	0.11726	1.02703	994.397	110	110	0	0
474	3.50698e+06	5.36976e+06	Gomaringen	0	1.9903	2	0.25	0.196429	0.5	0.155172	396.9	144596	0.0136777	1.48373	1.85863	0.0970857	1.08571	144.222	110.68	110.68	0	0
475	3.52162e+06	5.37427e+06	Metzingen	0	7.16248	3	0.2	0.214953	0.428571	0.165138	1329	16255.1	0.046787	1.18686	1.56641	0.121267	1.33648	1056.43	76.3217	76.3217	0	0
476	3.55645e+06	5.39185e+06	Gingen an der Fils	1	7.16157	3	0.25	0.588235	0	0.535714	7181.7	544352	0.0179697	1.1043	1.56275	0.127738	1.25	693.271	554.549	554.549	0	0
477	3.55829e+06	5.3888e+06	Kuchen	1	13.3116	3	0.333333	1	0	0.6	3979.1	1.18824e+06	0.0115027	1.02878	1.52941	0.11358	1.13072	239.27	580	169.853	0	0
478	3.51777e+06	5.37332e+06	Reutlingen	0	11.9156	4	0.21978	0.19774	0.205882	0.215686	431.8	851648	0.00670136	1.23563	1.5396	0.120979	1.29265	534.462	315	36.0555	0	0
479	3.52651e+06	5.3791e+06	Neuffen	0	11.3718	3	0.333333	0.326531	0.333333	0.222222	3269.1	674506	0.0153244	1.28788	1.79529	0.111786	1.13303	778.107	905	11.1803	0	0
480	3.5329e+06	5.3829e+06	Owen	0	10.3682	0	0.133333	0.47619	1	0.354167	3247.6	1.39443e+06	0.0107842	1.31243	1.74632	0.117756	1.05	42.4264	140.357	20.6155	0	0
481	3.51585e+06	5.36806e+06	Pfullingen	0	7.34912	3	0.363636	0.576923	0.285714	0.567568	2026.7	520492	0.0100736	1.16265	1.70163	0.117938	1.10118	190.066	140.089	140.089	0	0
482	3.53522e+06	5.38128e+06	Lenningen	0	6.25402	3	0.277778	0.221311	0	0.288288	1087	1.54264e+06	0.0133674	1.09145	1.55231	0.106074	0.965142	446.878	1113.4	330.151	0	0
483	3.53307e+06	5.39373e+06	Notzingen	1	4.46887	3	0.2	0.16	0	0.181818	273510	2283.77	0.092348	1.58633	2.37363	0.106287	1.20792	714.738	286.225	286.225	0	0
484	3.53735e+06	5.39383e+06	Schlierbach	0	4.40743	3	0	0.333333	0	0.166667	1654.7	76502.7	0.0165346	1.39391	2.01306	0.0852391	1.14667	631.862	715	380.033	0	0
485	3.51766e+06	5.37232e+06	Reutlingen	0	13.861	0	0.21978	0.19774	0.205882	0.215686	2140.9	159894	0.0198295	1.23563	1.5396	0.120979	1.29265	142.302	240	25	0	0
486	3.51965e+06	5.3843e+06	Altdorf	0	6.046	0	0.6	0.04	0	0.142857	0	140615	0.0155097	2.09142	2.66667	0.0938375	1.67647	300.541	345.326	345.326	0	0
487	3.55676e+06	5.39006e+06	Gingen an der Fils	1	11.9047	3	0.25	0.588235	0	0.535714	12684.6	27215.3	0.029903	1.1043	1.56275	0.127738	1.25	1139.23	764.739	240	0	0
488	3.54118e+06	5.38168e+06	Neidlingen	0	11.2022	4	0.2	0.157143	1	0.114286	2644.5	122806	0.0188951	1.31936	1.78261	0.10745	0.909091	578.705	962.406	107.703	0	0
489	3.5351e+06	5.38132e+06	Lenningen	0	5.95875	3	0.277778	0.221311	0	0.288288	915.4	1.54264e+06	0.0133674	1.09145	1.55231	0.106074	0.965142	395.127	1053.68	351.283	0	0
490	3.50145e+06	5.36584e+06	Ofterdingen	0	2.8574	2	0.363636	0.076923	1	0.142857	725.3	908719	0.0134922	1.64931	2.09688	0.10547	0.946809	738.529	1160.4	25	0	0
491	3.54579e+06	5.3985e+06	Wangen	0	5.52163	3	0.136364	0.277778	0	0.230769	955	28961.8	0.0457779	1.16083	1.83166	0.11236	1.1783	513.517	698.033	35.3553	0	0
492	3.53125e+06	5.38222e+06	Owen	0	11.3437	3	0.133333	0.47619	1	0.354167	109359	508268	0.0193484	1.31243	1.74632	0.117756	1.05	1129.44	25	25	0	0
493	3.52447e+06	5.37753e+06	Dettingen an der Erms	0	14.5777	3	0.230769	0.166667	1	0.159091	582.9	2.35355e+06	0.00791344	1.25849	1.75538	0.113123	1.88725	150.083	219.659	65	0	0
494	3.54196e+06	5.38961e+06	Zell unter Aichelberg	0	4.92968	3	0.266667	0.291667	0	0.297297	2534.4	262210	0.0205352	2.1257	2.71429	0.101889	1.52475	341.321	41.2311	41.2311	0	0
495	3.53437e+06	5.39125e+06	Kirchheim unter Teck	0	1.42774	3	0.181818	0.241379	0.181818	0.245098	2418.5	285161	0.00989804	1.22208	1.69769	0.119627	1.30893	308.423	303.191	85.44	0	0
496	3.53943e+06	5.3832e+06	Weilheim an der Teck	0	2.46329	3	0.297297	0.193798	0.230769	0.204545	4049.1	1.48249e+06	0.00924149	1.28113	1.82018	0.108577	1.03917	22.3607	90.1388	18.0278	0	0
497	3.52315e+06	5.37578e+06	Metzingen	0	8.32955	3	0.2	0.214953	0.428571	0.165138	962.9	80195.5	0.0257639	1.18686	1.56641	0.121267	1.33648	105.119	345.579	115.109	0	0
498	3.53525e+06	5.39124e+06	Kirchheim unter Teck	1	2.61202	3	0.181818	0.241379	0.181818	0.245098	2492.3	96536.3	0.0231511	1.22208	1.69769	0.119627	1.30893	406.079	46.0977	46.0977	0	0
499	3.54049e+06	5.38681e+06	Weilheim an der Teck	0	4.28615	3	0.297297	0.193798	0.230769	0.204545	1604.6	421013	0.0168905	1.28113	1.82018	0.108577	1.03917	100.499	555	26.9258	0	0
500	3.53431e+06	5.3942e+06	Hochdorf	0	5.27567	2	0.052632	0.307692	1	0.129032	3638.9	195328	0.013884	1.34266	2.08222	0.0941176	1.33333	390	738.546	15	0	0
501	3.50628e+06	5.36212e+06	Mössingen	0	10.7693	3	0.304348	0.11465	0	0.151316	32020.4	1.71355e+06	0.0133141	1.60177	2.13591	0.0976952	1.05316	1352.04	524.047	182.003	0	1
502	3.5155e+06	5.37049e+06	Pfullingen	0	22.0263	0	0.363636	0.576923	0.285714	0.567568	989.8	898104	0.00809342	1.16265	1.70163	0.117938	1.10118	100	853.83	145	0	0
503	3.52021e+06	5.38389e+06	Altdorf	1	4.7042	0	0.6	0.04	0	0.142857	810.3	5047.39	0.0689309	2.09142	2.66667	0.0938375	1.67647	0	20	7.07107	0	0
504	3.53665e+06	5.38988e+06	Kirchheim unter Teck	1	17.1533	0	0.181818	0.241379	0.181818	0.245098	5526.7	329072	0.0147349	1.22208	1.69769	0.119627	1.30893	582.28	127.769	0	1	0
505	3.54053e+06	5.38783e+06	Weilheim an der Teck	1	2.61515	0	0.297297	0.193798	0.230769	0.204545	6274.6	1.26914e+06	0.00550867	1.28113	1.82018	0.108577	1.03917	0	77.7817	15.8114	0	0
506	3.50825e+06	5.36799e+06	Gomaringen	0	4.71201	2	0.25	0.196429	0.5	0.155172	3121.1	23349.2	0.0316116	1.48373	1.85863	0.0970857	1.08571	210.06	376.364	18.0278	0	0
507	3.51744e+06	5.37181e+06	Eningen unter Achalm	0	11.8993	3	0.388889	0.6	0.4	0.392857	2281.9	783326	0.0104196	1.29455	1.67437	0.110704	1.02949	165.605	129.035	125.3	0	0
508	3.51369e+06	5.37708e+06	Reutlingen	0	2.02483	2	0.21978	0.19774	0.205882	0.215686	1651.6	31407.3	0.0352592	1.23563	1.5396	0.120979	1.29265	25.4951	155.081	41.2311	0	0
509	3.53234e+06	5.39136e+06	Kirchheim unter Teck	0	2.83499	3	0.181818	0.241379	0.181818	0.245098	3422.1	304064	0.0173842	1.22208	1.69769	0.119627	1.30893	255.392	175	175	0	0
510	3.53873e+06	5.38561e+06	Weilheim an der Teck	0	3.11659	3	0.297297	0.193798	0.230769	0.204545	880.9	1.55086e+06	0.00669018	1.28113	1.82018	0.108577	1.03917	354.189	735.153	69.4622	1	0
511	3.51282e+06	5.372e+06	Reutlingen	0	1.89323	3	0.21978	0.19774	0.205882	0.215686	4609.6	597842	0.0117804	1.23563	1.5396	0.120979	1.29265	545.825	834.865	18.0278	0	0
512	3.52464e+06	5.3783e+06	Neuffen	0	13.7169	3	0.333333	0.326531	0.333333	0.222222	853.7	2.35355e+06	0.00791344	1.28788	1.79529	0.111786	1.13303	293.471	148.071	148.071	0	0
513	3.53784e+06	5.3919e+06	Schlierbach	1	4.76703	3	0	0.333333	0	0.166667	2357.6	440253	0.01217	1.39391	2.01306	0.0852391	1.14667	699.214	880.923	263.866	0	0
514	3.52855e+06	5.38098e+06	Beuren	0	10.3826	3	0.076923	0.333333	0.333333	0.195652	470	328248	0.0129061	1.14684	1.5569	0.11726	1.02703	83.8153	199.812	62.6498	0	0
515	3.51781e+06	5.36948e+06	Pfullingen	0	5.2447	3	0.363636	0.576923	0.285714	0.567568	1013.6	1.02441e+06	0.00879794	1.16265	1.70163	0.117938	1.10118	105.475	603.511	101.119	0	0
516	3.54287e+06	5.39806e+06	Uhingen	1	13.6503	0	0.380952	0.264706	0.8	0.318841	139.1	44143.2	0.0449754	1.16457	1.74023	0.104612	1.14191	0	148.408	10	0	0
517	3.50521e+06	5.3647e+06	Nehren	0	9.20636	4	0	0	0	0	2452.9	1.29779e+06	0.0060432	1.69551	2.29424	0.103814	1.45652	390.16	195.256	195.256	0	0
518	3.51968e+06	5.37859e+06	Metzingen	0	15.9037	3	0.2	0.214953	0.428571	0.165138	5721.9	761523	0.0136683	1.18686	1.56641	0.121267	1.33648	132.004	112.361	112.361	0	0
519	3.53477e+06	5.39077e+06	Kirchheim unter Teck	1	3.93356	3	0.181818	0.241379	0.181818	0.245098	3621	229680	0.0142318	1.22208	1.69769	0.119627	1.30893	65	261.964	62.6498	0	0
520	3.53891e+06	5.39192e+06	Schlierbach	1	3.21403	3	0	0.333333	0	0.166667	2445	70060.6	0.0161015	1.39391	2.01306	0.0852391	1.14667	675	62.6498	62.6498	0	0
521	3.52344e+06	5.37802e+06	Metzingen	0	12.4708	3	0.2	0.214953	0.428571	0.165138	884	2.35355e+06	0.00791344	1.18686	1.56641	0.121267	1.33648	629.484	882.001	240.052	0	0
522	3.53451e+06	5.39323e+06	Notzingen	1	9.0261	0	0.2	0.16	0	0.181818	587.3	31776.8	0.0246192	1.58633	2.37363	0.106287	1.20792	0	323.806	29.1548	0	0
523	3.51055e+06	5.37227e+06	Reutlingen	0	0.636026	0	0.21978	0.19774	0.205882	0.215686	1043.4	774234	0.0129779	1.23563	1.5396	0.120979	1.29265	241.506	579.418	172.047	0	0
524	3.51765e+06	5.36871e+06	Pfullingen	0	7.12214	3	0.363636	0.576923	0.285714	0.567568	855.3	1.02441e+06	0.00879794	1.16265	1.70163	0.117938	1.10118	277.309	167.705	105.119	0	0
525	3.5327e+06	5.39293e+06	Notzingen	0	11.5772	3	0.2	0.16	0	0.181818	704.6	227464	0.0161938	1.58633	2.37363	0.106287	1.20792	485.412	380.526	380.526	0	0
526	3.50215e+06	5.36403e+06	Ofterdingen	0	13.7857	3	0.363636	0.076923	1	0.142857	743.6	63683.6	0.0262974	1.64931	2.09688	0.10547	0.946809	104.043	307.937	85.44	0	0
527	3.52939e+06	5.38186e+06	Beuren	0	8.28287	3	0.076923	0.333333	0.333333	0.195652	203.6	333570	0.0172854	1.14684	1.5569	0.11726	1.02703	33.541	187.417	79.0569	0	0
528	3.52854e+06	5.38117e+06	Beuren	0	10.2091	3	0.076923	0.333333	0.333333	0.195652	598.1	328248	0.0129061	1.14684	1.5569	0.11726	1.02703	66.7083	327.567	40	0	0
529	3.53885e+06	5.39415e+06	Schlierbach	0	3.78128	3	0	0.333333	0	0.166667	1156.7	121258	0.0258702	1.39391	2.01306	0.0852391	1.14667	699.089	62.6498	62.6498	0	0
530	3.51736e+06	5.36874e+06	Pfullingen	0	3.26898	3	0.363636	0.576923	0.285714	0.567568	1427.7	1.02441e+06	0.00879794	1.16265	1.70163	0.117938	1.10118	88.6002	98.2344	77.7817	0	0
531	3.52663e+06	5.38348e+06	Frickenhausen	0	7.84333	3	0.125	0.076923	0.5	0.054054	2094.1	1.34387e+06	0.00860131	1.19047	1.7225	0.103565	1.05882	43.0116	248.847	74.3303	0	0
532	3.52684e+06	5.38713e+06	Nürtingen	0	2.70581	3	0.2	0.22314	0.315789	0.226277	4692.5	560943	0.0180042	1.36016	1.73962	0.12287	1.1157	20.6155	375.033	50.2494	0	0
533	3.53215e+06	5.39167e+06	Kirchheim unter Teck	0	16.8835	4	0.181818	0.241379	0.181818	0.245098	2250.9	304064	0.0173842	1.22208	1.69769	0.119627	1.30893	339.89	287.837	287.837	0	0
534	3.55099e+06	5.39422e+06	Göppingen	1	31.9418	5	0.245902	0.57377	0.315789	0.36875	295.5	100380	0.0359038	1.02208	1.4472	0.138668	1.15129	81.3941	293.471	110.454	0	0
535	3.53934e+06	5.38773e+06	Weilheim an der Teck	1	1.48333	3	0.297297	0.193798	0.230769	0.204545	1834.9	3633.39	0.0889481	1.28113	1.82018	0.108577	1.03917	180.278	177.2	174.141	0	0
536	3.53118e+06	5.38225e+06	Owen	0	10.0352	3	0.133333	0.47619	1	0.354167	109359	508268	0.0193484	1.31243	1.74632	0.117756	1.05	1083.01	79.0569	79.0569	0	0
537	3.55874e+06	5.39385e+06	Donzdorf	1	6.48616	0	0.327273	0.537037	0	0.479592	700.6	23787.6	0.0442601	1.1454	1.8843	0.103731	1.31707	0	721.803	26.9258	0	0
538	3.52887e+06	5.37831e+06	Neuffen	0	6.75655	3	0.333333	0.326531	0.333333	0.222222	2137.6	1.04757e+06	0.0118645	1.28788	1.79529	0.111786	1.13303	897.009	449.222	281.78	0	0
539	3.55861e+06	5.39384e+06	Donzdorf	1	8.29889	0	0.327273	0.537037	0	0.479592	720.7	48499.2	0.0223242	1.1454	1.8843	0.103731	1.31707	0	719.809	18.0278	0	0
540	3.53945e+06	5.38555e+06	Weilheim an der Teck	0	11.12	0	0.297297	0.193798	0.230769	0.204545	375.2	1.55086e+06	0.00669018	1.28113	1.82018	0.108577	1.03917	505.223	782.368	100	1	0
541	3.52616e+06	5.37907e+06	Neuffen	0	7.39525	0	0.333333	0.326531	0.333333	0.222222	0	674506	0.0153244	1.28788	1.79529	0.111786	1.13303	1048.87	964.21	210.238	0	0
542	3.54295e+06	5.3907e+06	Zell unter Aichelberg	0	4.13071	3	0.266667	0.291667	0	0.297297	10542	9941.45	0.0538882	2.1257	2.71429	0.101889	1.52475	132.004	1003.86	55.9017	0	0
543	3.5156e+06	5.36719e+06	Pfullingen	0	1.96584	3	0.363636	0.576923	0.285714	0.567568	980.4	520492	0.0100736	1.16265	1.70163	0.117938	1.10118	576.238	258.94	149.164	0	0
544	3.53779e+06	5.39061e+06	Ohmden	1	15.4765	3	0.5	0.103448	0	0.148148	2050.7	584209	0.0130428	1.41308	2.06513	0.102155	1.23529	695.432	858.4	246.678	0	0
545	3.5242e+06	5.37906e+06	Neuffen	0	9.60582	3	0.333333	0.326531	0.333333	0.222222	1674.6	2.35355e+06	0.00791344	1.28788	1.79529	0.111786	1.13303	60.208	94.8683	94.8683	0	0
546	3.55818e+06	5.38867e+06	Kuchen	0	14.6828	3	0.333333	1	0	0.6	4095.8	1.18824e+06	0.0115027	1.02878	1.52941	0.11358	1.13072	226.55	746.676	203.593	0	0
547	3.53901e+06	5.39016e+06	Ohmden	0	9.00311	3	0.5	0.103448	0	0.148148	897.4	584209	0.0130428	1.41308	2.06513	0.102155	1.23529	21.2132	116.619	58.3095	0	0
548	3.5154e+06	5.36871e+06	Pfullingen	0	32.0295	3	0.363636	0.576923	0.285714	0.567568	1788.9	349775	0.0184245	1.16265	1.70163	0.117938	1.10118	169.189	205.244	65.7647	0	0
549	3.5217e+06	5.37595e+06	Metzingen	0	9.1971	3	0.2	0.214953	0.428571	0.165138	1161.2	505116	0.00726691	1.18686	1.56641	0.121267	1.33648	1000.71	792.748	272.947	0	0
550	3.52499e+06	5.38223e+06	Frickenhausen	0	12.9417	3	0.125	0.076923	0.5	0.054054	1450.6	40833.7	0.0288378	1.19047	1.7225	0.103565	1.05882	125	287.272	152.398	0	0
551	3.51475e+06	5.36968e+06	Pfullingen	0	14.6153	0	0.363636	0.576923	0.285714	0.567568	1043.1	174635	0.0115238	1.16265	1.70163	0.117938	1.10118	720.85	1345.68	95.5249	0	0
552	3.50223e+06	5.36166e+06	Mössingen	1	4.18889	0	0.304348	0.11465	0	0.151316	6129.7	62679.5	0.0186482	1.60177	2.13591	0.0976952	1.05316	0	322.374	0	0	0
553	3.53282e+06	5.38258e+06	Owen	0	7.63519	3	0.133333	0.47619	1	0.354167	1551	1.39443e+06	0.0107842	1.31243	1.74632	0.117756	1.05	237.171	465	158.114	0	0
554	3.53231e+06	5.39179e+06	Kirchheim unter Teck	0	3.26859	3	0.181818	0.241379	0.181818	0.245098	2312.6	176278	0.0145955	1.22208	1.69769	0.119627	1.30893	197.8	154.029	154.029	0	0
555	3.50057e+06	5.36258e+06	Mössingen	1	3.35878	3	0.304348	0.11465	0	0.151316	991	5403.24	0.0679365	1.60177	2.13591	0.0976952	1.05316	245.459	361.006	356.721	0	0
556	3.51771e+06	5.37175e+06	Eningen unter Achalm	0	24.2086	3	0.388889	0.6	0.4	0.392857	2263.2	783326	0.0104196	1.29455	1.67437	0.110704	1.02949	129.808	375.832	150.083	0	0
557	3.52532e+06	5.37775e+06	Dettingen an der Erms	0	11.0252	0	0.230769	0.166667	1	0.159091	776.5	2.35355e+06	0.00791344	1.25849	1.75538	0.113123	1.88725	0	654.714	32.0156	0	0
558	3.51967e+06	5.37738e+06	Metzingen	0	6.17233	3	0.2	0.214953	0.428571	0.165138	2287.9	28324.7	0.0450895	1.18686	1.56641	0.121267	1.33648	250	120	28.2843	0	0
559	3.53612e+06	5.38848e+06	Kirchheim unter Teck	0	1.50836	3	0.181818	0.241379	0.181818	0.245098	1866.3	260751	0.0226392	1.22208	1.69769	0.119627	1.30893	333.242	380.033	73.8241	0	0
560	3.52286e+06	5.37846e+06	Metzingen	0	18.898	0	0.2	0.214953	0.428571	0.165138	617.8	2.35355e+06	0.00791344	1.18686	1.56641	0.121267	1.33648	708.255	279.732	261.008	0	0
561	3.52704e+06	5.38183e+06	Neuffen	0	4.38005	3	0.333333	0.326531	0.333333	0.222222	1345.1	1.34387e+06	0.00860131	1.28788	1.79529	0.111786	1.13303	403.299	595.189	348.855	0	0
562	3.53828e+06	5.39025e+06	Ohmden	1	4.0585	3	0.5	0.103448	0	0.148148	1539.5	584209	0.0130428	1.41308	2.06513	0.102155	1.23529	165	345	212.25	0	0
563	3.52972e+06	5.39394e+06	Wendlingen am Neckar	0	1.51906	0	0.357143	0.071429	0.333333	0.375	0	200062	0.0158362	1.17744	1.7408	0.0861055	1.28011	1073.55	1676.97	594.348	0	0
564	3.54986e+06	5.39458e+06	Göppingen	0	6.89913	0	0.245902	0.57377	0.315789	0.36875	411244	504978	0.0167878	1.02208	1.4472	0.138668	1.15129	0	406.725	14.1421	0	0
565	3.52648e+06	5.38208e+06	Frickenhausen	0	7.20182	3	0.125	0.076923	0.5	0.054054	1146.6	1.34387e+06	0.00860131	1.19047	1.7225	0.103565	1.05882	603.366	1029.33	150	0	0
566	3.53978e+06	5.38323e+06	Weilheim an der Teck	0	16.1474	3	0.297297	0.193798	0.230769	0.204545	69269.2	1.48249e+06	0.00924149	1.28113	1.82018	0.108577	1.03917	143.003	5	5	0	0
567	3.50699e+06	5.36306e+06	Mössingen	0	9.13208	3	0.304348	0.11465	0	0.151316	1196.5	402234	0.0211169	1.60177	2.13591	0.0976952	1.05316	845.946	465.108	154.353	0	1
568	3.53869e+06	5.38556e+06	Weilheim an der Teck	0	1.97719	3	0.297297	0.193798	0.230769	0.204545	1153.5	1.55086e+06	0.00669018	1.28113	1.82018	0.108577	1.03917	414.879	786.591	18.0278	1	0
569	3.5433e+06	5.39415e+06	Uhingen	0	1.54405	2	0.380952	0.264706	0.8	0.318841	8854.6	29360.8	0.0240613	1.16457	1.74023	0.104612	1.14191	70	237.118	61.8466	0	0
570	3.52732e+06	5.38425e+06	Frickenhausen	0	9.75176	3	0.125	0.076923	0.5	0.054054	750	1.08813e+06	0.00929233	1.19047	1.7225	0.103565	1.05882	96.1769	652.553	100	0	0
571	3.53265e+06	5.38856e+06	Kirchheim unter Teck	1	4.81394	0	0.181818	0.241379	0.181818	0.245098	23363.3	226243	0.0121098	1.22208	1.69769	0.119627	1.30893	608.276	126.194	75.1665	0	0
572	3.52988e+06	5.39379e+06	Wendlingen am Neckar	0	8.10089	0	0.357143	0.071429	0.333333	0.375	0	200062	0.0158362	1.17744	1.7408	0.0861055	1.28011	948.815	1531.62	420.743	0	0
573	3.54123e+06	5.38384e+06	Weilheim an der Teck	0	22.1434	3	0.297297	0.193798	0.230769	0.204545	3463.1	881477	0.0160684	1.28113	1.82018	0.108577	1.03917	393.859	415.482	149.833	0	0
574	3.52598e+06	5.38004e+06	Neuffen	0	2.21537	0	0.333333	0.326531	0.333333	0.222222	23146.9	30926.5	0.0431398	1.28788	1.79529	0.111786	1.13303	270.647	5	5	0	0
575	3.53817e+06	5.39173e+06	Schlierbach	0	4.07248	2	0	0.333333	0	0.166667	1608	440253	0.01217	1.39391	2.01306	0.0852391	1.14667	800.063	737.631	70	0	0
576	3.53621e+06	5.38689e+06	Kirchheim unter Teck	0	0.746782	3	0.181818	0.241379	0.181818	0.245098	1298.3	211958	0.0254066	1.22208	1.69769	0.119627	1.30893	114.237	632.535	92.1954	0	0
577	3.54209e+06	5.38162e+06	Neidlingen	0	8.97633	0	0.2	0.157143	1	0.114286	0	63182.6	0.0226037	1.31936	1.78261	0.10745	0.909091	197.231	345.615	175.071	0	0
578	3.54598e+06	5.39972e+06	Rechberghausen	0	3.6132	3	0.454545	0.5	0	0.545455	1260.5	4263.3	0.0703616	1.17103	1.82626	0.112584	1.18	416.773	15.8114	15.8114	0	0
579	3.54654e+06	5.38877e+06	Dürnau	0	3.91871	3	0.461538	0.545455	1	0.5	4316.8	5957.37	0.0946336	1.42809	2.06038	0.0877763	1.47761	479.401	630.099	85	0	0
580	3.53397e+06	5.38344e+06	Owen	0	9.91193	3	0.133333	0.47619	1	0.354167	866.2	2.05861e+06	0.00932867	1.31243	1.74632	0.117756	1.05	234.307	229.837	229.837	0	0
581	3.53923e+06	5.39392e+06	Schlierbach	0	0.905183	3	0	0.333333	0	0.166667	3952.3	121258	0.0258702	1.39391	2.01306	0.0852391	1.14667	272.029	254.558	254.558	0	0
582	3.52823e+06	5.38029e+06	Neuffen	0	4.09995	3	0.333333	0.326531	0.333333	0.222222	856.7	40575.5	0.0300515	1.28788	1.79529	0.111786	1.13303	35.3553	109.659	32.0156	0	0
583	3.53605e+06	5.38447e+06	Bissingen an der Teck	1	5.07309	3	0.333333	0.212766	0.5	0.254237	318.3	1.06197e+06	0.0117425	1.35031	1.68719	0.114481	0.989418	25	426.38	40.3113	0	0
584	3.5409e+06	5.38307e+06	Neidlingen	0	6.53836	3	0.2	0.157143	1	0.114286	874.8	1.48249e+06	0.00924149	1.31936	1.78261	0.10745	0.909091	180.693	340.588	7.07107	0	0
585	3.50354e+06	5.36241e+06	Mössingen	1	6.76496	0	0.304348	0.11465	0	0.151316	1772.4	249772	0.0178124	1.60177	2.13591	0.0976952	1.05316	5	286.007	36.0555	0	0
586	3.51958e+06	5.3712e+06	Eningen unter Achalm	0	8.29967	3	0.388889	0.6	0.4	0.392857	2186.4	538420	0.0157695	1.29455	1.67437	0.110704	1.02949	365.855	795.063	10	0	0
587	3.50267e+06	5.3688e+06	Dußlingen	0	2.03494	2	0.2	0.128205	0	0.090909	924.2	397964	0.0101867	1.22642	1.77338	0.102978	0.989209	1022.37	1910.01	46.0977	0	0
588	3.51112e+06	5.37466e+06	Wannweil	0	14.9956	0	0.5	0.2	0.2	0.166667	0	359132	0.0117938	1.10228	1.56674	0.126792	1.42478	192.094	809.475	224.722	0	0
589	3.53898e+06	5.39728e+06	Ebersbach an der Fils	1	12.4518	3	0.288136	0.571429	0	0.370787	2075.4	59622.9	0.0387015	1.1282	1.82888	0.0992791	1.14139	176.706	96.1769	96.1769	0	0
590	3.52702e+06	5.37908e+06	Neuffen	0	8.52841	3	0.333333	0.326531	0.333333	0.222222	10071	674506	0.0153244	1.28788	1.79529	0.111786	1.13303	417.253	745.017	105.119	0	0
591	3.55665e+06	5.39046e+06	Gingen an der Fils	0	11.4293	3	0.25	0.588235	0	0.535714	2022.4	7373.06	0.0487661	1.1043	1.56275	0.127738	1.25	941.727	396.548	35	0	0
592	3.53406e+06	5.38142e+06	Lenningen	0	9.43005	4	0.277778	0.221311	0	0.288288	24656.2	1.54264e+06	0.0133674	1.09145	1.55231	0.106074	0.965142	189.737	302.035	223.607	0	0
593	3.52074e+06	5.38073e+06	Riederich	0	7.12781	3	0	0	0	0	2458.5	257751	0.0186256	1.66874	2.11765	0.101444	1.31193	541.133	646.239	91.7878	0	0
594	3.53853e+06	5.3947e+06	Ebersbach an der Fils	0	8.01219	2	0.288136	0.571429	0	0.370787	342.9	160757	0.0210849	1.1282	1.82888	0.0992791	1.14139	1222.39	696.581	70.7107	0	0
595	3.51144e+06	5.36734e+06	Reutlingen	0	7.68222	3	0.21978	0.19774	0.205882	0.215686	2440	408466	0.0191366	1.23563	1.5396	0.120979	1.29265	289.007	141.421	88.459	0	0
596	3.51968e+06	5.38419e+06	Altdorf	0	5.59826	0	0.6	0.04	0	0.142857	0	140615	0.0155097	2.09142	2.66667	0.0938375	1.67647	199.06	238.537	238.537	0	0
597	3.5338e+06	5.38537e+06	Dettingen unter Teck	0	2.11223	3	0.2	0.049296	0	0.107692	3703.7	2.05861e+06	0.00932867	1.37194	1.76895	0.12934	1.03196	531.272	379.638	344.42	0	0
598	3.52928e+06	5.39183e+06	Wendlingen am Neckar	1	3.807	0	0.357143	0.071429	0.333333	0.375	9286.3	403361	0.00978381	1.17744	1.7408	0.0861055	1.28011	302.035	355.106	35.3553	0	0
599	3.54141e+06	5.39233e+06	Hattenhofen	1	9.4615	0	0.1	0.55	0	0.342105	1082.3	39397.7	0.032332	1.84567	2.32571	0.107832	1.25893	0	63.6396	18.0278	0	0
600	3.5257e+06	5.37764e+06	Dettingen an der Erms	0	10.2846	3	0.230769	0.166667	1	0.159091	656.5	2.35355e+06	0.00791344	1.25849	1.75538	0.113123	1.88725	72.8011	1000.2	5	0	0
601	3.51722e+06	5.37427e+06	Reutlingen	0	8.78903	0	0.21978	0.19774	0.205882	0.215686	45951.5	851648	0.00670136	1.23563	1.5396	0.120979	1.29265	77.7817	91.7878	74.3303	0	0
602	3.53466e+06	5.38505e+06	Dettingen unter Teck	0	12.1516	3	0.2	0.049296	0	0.107692	1503.2	2.05861e+06	0.00932867	1.37194	1.76895	0.12934	1.03196	879.119	997.121	116.619	0	0
603	3.51795e+06	5.36964e+06	Pfullingen	0	10.3831	3	0.363636	0.576923	0.285714	0.567568	874.9	1.02441e+06	0.00879794	1.16265	1.70163	0.117938	1.10118	180	774.677	42.72	0	0
604	3.53452e+06	5.39052e+06	Kirchheim unter Teck	0	8.58683	3	0.181818	0.241379	0.181818	0.245098	1477.1	229680	0.0142318	1.22208	1.69769	0.119627	1.30893	55.9017	438.292	52.2015	0	0
605	3.50402e+06	5.36167e+06	Mössingen	0	11.1814	4	0.304348	0.11465	0	0.151316	52931.8	1.71355e+06	0.0133141	1.60177	2.13591	0.0976952	1.05316	428.077	1170.52	209.404	0	1
606	3.52094e+06	5.38331e+06	Altdorf	1	2.78402	3	0.6	0.04	0	0.142857	274117	8619.02	0.0463614	2.09142	2.66667	0.0938375	1.67647	769.562	242.745	5	0	0
607	3.53649e+06	5.38358e+06	Bissingen an der Teck	0	8.93642	3	0.333333	0.212766	0.5	0.254237	3653.2	534268	0.0160772	1.35031	1.68719	0.114481	0.989418	426.907	580.194	220.907	0	1
608	3.53021e+06	5.39017e+06	Kirchheim unter Teck	1	5.12154	2	0.181818	0.241379	0.181818	0.245098	2447.7	54402.4	0.0254032	1.22208	1.69769	0.119627	1.30893	11.1803	240.416	20.6155	0	0
609	3.5352e+06	5.38324e+06	Bissingen an der Teck	0	13.1625	4	0.333333	0.212766	0.5	0.254237	1.87545e+06	52357.3	0.0223733	1.35031	1.68719	0.114481	0.989418	1126.82	1079.32	172.192	1	0
610	3.52827e+06	5.38263e+06	Frickenhausen	0	17.3346	3	0.125	0.076923	0.5	0.054054	434.2	239770	0.01344	1.19047	1.7225	0.103565	1.05882	351.283	167.631	115	0	0
611	3.52652e+06	5.37922e+06	Neuffen	0	9.29044	3	0.333333	0.326531	0.333333	0.222222	4008.1	674506	0.0153244	1.28788	1.79529	0.111786	1.13303	690.018	780	80.6226	0	0
612	3.53233e+06	5.39292e+06	Wernau (Neckar)	1	11.2425	3	0.285714	0.214286	0	0.384615	845.2	227464	0.0161938	0.987809	1.53707	0.0834862	1.16606	844.349	436.406	436.406	0	0
613	3.53348e+06	5.39206e+06	Notzingen	0	8.18312	3	0.2	0.16	0	0.181818	564.8	95728.5	0.0333639	1.58633	2.37363	0.106287	1.20792	298.329	335.932	192.419	0	0
614	3.51174e+06	5.36765e+06	Reutlingen	0	4.40133	3	0.21978	0.19774	0.205882	0.215686	4718.7	408466	0.0191366	1.23563	1.5396	0.120979	1.29265	709.965	131.529	103.078	0	0
615	3.53915e+06	5.39431e+06	Schlierbach	0	1.50934	3	0	0.333333	0	0.166667	3665.6	29462.3	0.0226062	1.39391	2.01306	0.0852391	1.14667	654.618	21.2132	21.2132	0	0
616	3.50592e+06	5.36226e+06	Mössingen	0	9.74307	3	0.304348	0.11465	0	0.151316	47705.7	1.71355e+06	0.0133141	1.60177	2.13591	0.0976952	1.05316	970.979	736.359	132.853	0	1
617	3.50284e+06	5.36081e+06	Mössingen	0	4.26036	3	0.304348	0.11465	0	0.151316	174822	186364	0.0204816	1.60177	2.13591	0.0976952	1.05316	806.381	1152.44	25	0	1
618	3.55823e+06	5.38924e+06	Kuchen	0	12.5782	3	0.333333	1	0	0.6	6456	1.18824e+06	0.0115027	1.02878	1.52941	0.11358	1.13072	289.353	325	91.9239	0	0
619	3.52823e+06	5.38172e+06	Beuren	0	4.22812	3	0.076923	0.333333	0.333333	0.195652	1378.8	45095.8	0.0279418	1.14684	1.5569	0.11726	1.02703	635.315	551.928	208.147	0	0
620	3.53257e+06	5.38695e+06	Dettingen unter Teck	0	6.63948	3	0.2	0.049296	0	0.107692	1292.3	1.70997e+06	0.00989906	1.37194	1.76895	0.12934	1.03196	211.483	1065.11	68.0074	0	0
621	3.51988e+06	5.38371e+06	Altdorf	1	2.62617	0	0.6	0.04	0	0.142857	6856.5	9308.86	0.0522381	2.09142	2.66667	0.0938375	1.67647	68.0074	0	0	0	0
622	3.5312e+06	5.39191e+06	Kirchheim unter Teck	0	2.81809	3	0.181818	0.241379	0.181818	0.245098	973.5	118721	0.0121762	1.22208	1.69769	0.119627	1.30893	141.421	137.931	137.931	0	0
623	3.5036e+06	5.36113e+06	Mössingen	0	19.1675	5	0.304348	0.11465	0	0.151316	1267.6	395296	0.0136412	1.60177	2.13591	0.0976952	1.05316	525.856	1216.41	384.22	0	1
624	3.52373e+06	5.37928e+06	Neuffen	0	7.55563	3	0.333333	0.326531	0.333333	0.222222	1523.6	305005	0.0192568	1.28788	1.79529	0.111786	1.13303	368.409	100.623	5	0	0
625	3.51916e+06	5.38169e+06	Bempflingen	0	8.67991	3	0.333333	0.363636	1	0.272727	5071.2	269162	0.020936	1.26159	1.79849	0.0983425	1.38889	91.9239	55	15	0	0
626	3.53135e+06	5.3919e+06	Kirchheim unter Teck	0	10.4685	3	0.181818	0.241379	0.181818	0.245098	572	118721	0.0121762	1.22208	1.69769	0.119627	1.30893	50.2494	21.2132	21.2132	0	0
627	3.5251e+06	5.37831e+06	Dettingen an der Erms	0	6.37001	3	0.230769	0.166667	1	0.159091	3555.7	2.35355e+06	0.00791344	1.25849	1.75538	0.113123	1.88725	589.936	607.166	600.833	0	0
628	3.53298e+06	5.38576e+06	Dettingen unter Teck	0	10.8132	3	0.2	0.049296	0	0.107692	2976.4	1.70997e+06	0.00989906	1.37194	1.76895	0.12934	1.03196	235.85	498.448	76.4853	0	0
629	3.52775e+06	5.37824e+06	Neuffen	0	7.34972	3	0.333333	0.326531	0.333333	0.222222	1980	1.04757e+06	0.0118645	1.28788	1.79529	0.111786	1.13303	783.023	1132.45	71.5891	0	0
630	3.53203e+06	5.38607e+06	Dettingen unter Teck	0	6.61427	3	0.2	0.049296	0	0.107692	1696.5	1.70997e+06	0.00989906	1.37194	1.76895	0.12934	1.03196	973.717	1492.82	129.035	0	0
631	3.51868e+06	5.38202e+06	Bempflingen	0	6.58653	2	0.333333	0.363636	1	0.272727	992.8	269162	0.020936	1.26159	1.79849	0.0983425	1.38889	153.052	148.661	148.661	0	0
632	3.5271e+06	5.38203e+06	Frickenhausen	0	10.711	3	0.125	0.076923	0.5	0.054054	1151.7	1.34387e+06	0.00860131	1.19047	1.7225	0.103565	1.05882	244.233	477.624	264.055	0	0
633	3.53873e+06	5.38605e+06	Weilheim an der Teck	0	1.38147	3	0.297297	0.193798	0.230769	0.204545	6197.1	43554.8	0.0346208	1.28113	1.82018	0.108577	1.03917	187.417	290.172	45	0	0
634	3.5492e+06	5.38986e+06	Heiningen	1	5.26445	3	0.185185	0.526316	1	0.348837	4318.4	45719.8	0.0388304	1.53551	2.04153	0.103488	1.07647	427.2	1171.54	32.0156	0	0
635	3.55632e+06	5.39049e+06	Gingen an der Fils	0	12.4033	3	0.25	0.588235	0	0.535714	7285.3	6559.74	0.0645568	1.1043	1.56275	0.127738	1.25	868.332	485	171.026	0	0
636	3.52749e+06	5.38342e+06	Frickenhausen	0	7.33199	3	0.125	0.076923	0.5	0.054054	32967.3	1.08813e+06	0.00929233	1.19047	1.7225	0.103565	1.05882	212.25	496.488	125.399	0	0
637	3.53826e+06	5.38813e+06	Holzmaden	0	3.76177	3	1	0.166667	0	0.235294	1126.6	59658.8	0.028739	1.40334	1.87306	0.117076	1.13889	136.473	107.935	68.0074	0	0
638	3.53235e+06	5.3866e+06	Dettingen unter Teck	1	4.46091	0	0.2	0.049296	0	0.107692	3606.2	1.70997e+06	0.00989906	1.37194	1.76895	0.12934	1.03196	537.82	1291.39	110.114	0	0
639	3.51671e+06	5.36854e+06	Pfullingen	1	7.43139	3	0.363636	0.576923	0.285714	0.567568	78337.6	298858	0.0111596	1.16265	1.70163	0.117938	1.10118	0	345.145	86.0233	0	0
640	3.55941e+06	5.38774e+06	Geislingen an der Steige	1	8.53609	0	0.252174	0.616667	0.25	0.360248	0	1.18824e+06	0.0115027	0.886321	1.27693	0.136996	1.04238	604.007	745.822	207.183	0	0
641	3.50693e+06	5.37247e+06	Kusterdingen	0	2.11361	1	0.259259	0.168675	1	0.153226	448.1	29790.5	0.034982	1.39645	1.80254	0.10766	1.5061	584.059	893.322	95	0	0
642	3.51545e+06	5.36781e+06	Pfullingen	0	3.49785	3	0.363636	0.576923	0.285714	0.567568	1120.9	520492	0.0100736	1.16265	1.70163	0.117938	1.10118	449.944	189.275	176.777	0	0
643	3.52338e+06	5.37587e+06	Metzingen	1	5.52783	3	0.2	0.214953	0.428571	0.165138	7561.9	89598	0.0319904	1.18686	1.56641	0.121267	1.33648	244.387	562.694	285.701	0	0
644	3.51301e+06	5.37192e+06	Reutlingen	0	8.6586	3	0.21978	0.19774	0.205882	0.215686	1960.5	597842	0.0117804	1.23563	1.5396	0.120979	1.29265	349.357	915.123	56.5685	0	0
645	3.50491e+06	5.36273e+06	Mössingen	1	3.22858	0	0.304348	0.11465	0	0.151316	787.4	1.71355e+06	0.0133141	1.60177	2.13591	0.0976952	1.05316	0	741.772	5	0	0
646	3.52245e+06	5.37769e+06	Metzingen	0	0.661103	2	0.2	0.214953	0.428571	0.165138	552.4	2.35355e+06	0.00791344	1.18686	1.56641	0.121267	1.33648	10	753.558	7.07107	0	0
647	3.51909e+06	5.3705e+06	Eningen unter Achalm	0	8.35184	0	0.388889	0.6	0.4	0.392857	1601.1	310933	0.0115632	1.29455	1.67437	0.110704	1.02949	201.556	875.685	5	0	0
648	3.53231e+06	5.38625e+06	Dettingen unter Teck	0	7.39632	3	0.2	0.049296	0	0.107692	818.3	1.70997e+06	0.00989906	1.37194	1.76895	0.12934	1.03196	700.179	1267.46	42.4264	0	0
649	3.51461e+06	5.37857e+06	Reutlingen	1	7.262	3	0.21978	0.19774	0.205882	0.215686	1145.5	103592	0.0304212	1.23563	1.5396	0.120979	1.29265	357.946	418.718	140	0	0
650	3.52149e+06	5.37615e+06	Metzingen	0	16.223	3	0.2	0.214953	0.428571	0.165138	856.2	505116	0.00726691	1.18686	1.56641	0.121267	1.33648	990.808	740.27	83.8153	0	0
651	3.5285e+06	5.38156e+06	Beuren	0	9.82725	3	0.076923	0.333333	0.333333	0.195652	1541.7	29324.4	0.025708	1.14684	1.5569	0.11726	1.02703	372.324	596.657	223.607	0	0
652	3.52711e+06	5.38042e+06	Neuffen	0	11.7126	3	0.333333	0.326531	0.333333	0.222222	3806.2	1.20814e+06	0.013945	1.28788	1.79529	0.111786	1.13303	177.341	498.824	172.192	0	0
653	3.54118e+06	5.38164e+06	Neidlingen	0	9.80304	3	0.2	0.157143	1	0.114286	2429.5	122806	0.0188951	1.31936	1.78261	0.10745	0.909091	588.154	992.824	149.833	0	0
654	3.50689e+06	5.36293e+06	Mössingen	0	10.0532	3	0.304348	0.11465	0	0.151316	6612.9	402234	0.0211169	1.60177	2.13591	0.0976952	1.05316	998.123	435.029	214.767	0	1
655	3.55334e+06	5.39423e+06	Eislingen/ Fils	0	12.6924	3	0.225	0.75	0.6	0.395833	6679.8	42982.8	0.0314197	1.10179	1.50558	0.120292	1.10272	333.017	80	80	0	0
656	3.53222e+06	5.39169e+06	Kirchheim unter Teck	0	20.9923	4	0.181818	0.241379	0.181818	0.245098	3292.7	304064	0.0173842	1.22208	1.69769	0.119627	1.30893	275.045	223.607	223.607	0	0
657	3.50471e+06	5.36226e+06	Mössingen	0	5.5825	3	0.304348	0.11465	0	0.151316	1506.1	1.71355e+06	0.0133141	1.60177	2.13591	0.0976952	1.05316	171.026	1065.05	226.385	0	0
658	3.52518e+06	5.38569e+06	Nürtingen	1	6.35404	0	0.2	0.22314	0.315789	0.226277	3884.7	76809.1	0.0229895	1.36016	1.73962	0.12287	1.1157	0	686.477	20.6155	0	0
659	3.54858e+06	5.38953e+06	Heiningen	0	7.8815	3	0.185185	0.526316	1	0.348837	1139.1	103799	0.026749	1.53551	2.04153	0.103488	1.07647	226.385	559.933	45	0	0
660	3.5524e+06	5.39474e+06	Eislingen/ Fils	1	2.69614	2	0.225	0.75	0.6	0.395833	5567.6	111053	0.0270164	1.10179	1.50558	0.120292	1.10272	5	534.462	0	0	0
661	3.52718e+06	5.38414e+06	Frickenhausen	0	6.38212	3	0.125	0.076923	0.5	0.054054	1111.2	1.08813e+06	0.00929233	1.19047	1.7225	0.103565	1.05882	7.07107	480.208	5	0	0
662	3.53221e+06	5.38411e+06	Owen	0	2.52394	3	0.133333	0.47619	1	0.354167	6942.5	1.39443e+06	0.0107842	1.31243	1.74632	0.117756	1.05	605.083	990	25	0	0
663	3.53203e+06	5.39215e+06	Kirchheim unter Teck	1	4.02478	3	0.181818	0.241379	0.181818	0.245098	563.8	176278	0.0145955	1.22208	1.69769	0.119627	1.30893	633.344	32.0156	32.0156	0	0
664	3.52151e+06	5.38369e+06	Großbettlingen	1	11.8823	3	0.333333	0.222222	0	0.25	916.6	55039.4	0.0287892	1.73035	2.47265	0.0858525	1.60976	745.553	460.489	164.469	0	0
665	3.52582e+06	5.37929e+06	Neuffen	0	8.07829	3	0.333333	0.326531	0.333333	0.222222	2539.3	674506	0.0153244	1.28788	1.79529	0.111786	1.13303	690.959	768.651	118.004	0	0
666	3.52517e+06	5.38055e+06	Kohlberg	0	11.906	3	0.25	0.076923	0	0.035714	1310	1.20814e+06	0.013945	1.33489	1.88101	0.109253	1.40323	33.541	310.645	57.0088	0	0
667	3.51091e+06	5.37458e+06	Wannweil	0	7.26199	0	0.5	0.2	0.2	0.166667	0	359132	0.0117938	1.10228	1.56674	0.126792	1.42478	362.215	992.975	222.036	0	0
668	3.55936e+06	5.38801e+06	Geislingen an der Steige	1	5.78113	3	0.252174	0.616667	0.25	0.360248	3208	1.18824e+06	0.0115027	0.886321	1.27693	0.136996	1.04238	418.151	524.047	87.4643	0	0
669	3.54755e+06	5.39575e+06	Göppingen	1	14.3028	3	0.245902	0.57377	0.315789	0.36875	5216.7	37204	0.0249001	1.02208	1.4472	0.138668	1.15129	0	122.984	25	0	0
670	3.53833e+06	5.3902e+06	Ohmden	1	3.94674	3	0.5	0.103448	0	0.148148	1713.8	584209	0.0130428	1.41308	2.06513	0.102155	1.23529	125.399	296.522	149.164	0	0
671	3.52505e+06	5.38214e+06	Frickenhausen	0	7.18567	3	0.125	0.076923	0.5	0.054054	9232.2	40833.7	0.0288378	1.19047	1.7225	0.103565	1.05882	229.837	373.631	240.208	0	0
672	3.5199e+06	5.37153e+06	Eningen unter Achalm	0	11.0326	3	0.388889	0.6	0.4	0.392857	1512.8	538420	0.0157695	1.29455	1.67437	0.110704	1.02949	91.7878	761.61	11.1803	0	0
673	3.5136e+06	5.37184e+06	Reutlingen	0	1.87487	3	0.21978	0.19774	0.205882	0.215686	4289.6	76179	0.0272382	1.23563	1.5396	0.120979	1.29265	40	622.676	40.3113	0	0
674	3.53497e+06	5.39559e+06	Hochdorf	1	4.26207	0	0.052632	0.307692	1	0.129032	2053.4	539415	0.0175797	1.34266	2.08222	0.0941176	1.33333	0	508.257	0	0	0
675	3.51849e+06	5.37225e+06	Eningen unter Achalm	1	9.0408	0	0.388889	0.6	0.4	0.392857	1539.9	783326	0.0104196	1.29455	1.67437	0.110704	1.02949	11.1803	652.093	40	0	0
676	3.5064e+06	5.36249e+06	Mössingen	0	5.55796	3	0.304348	0.11465	0	0.151316	507.3	117554	0.0187532	1.60177	2.13591	0.0976952	1.05316	1247.4	221.02	87.4643	0	0
677	3.5057e+06	5.36266e+06	Mössingen	0	4.35072	3	0.304348	0.11465	0	0.151316	2011.1	1.71355e+06	0.0133141	1.60177	2.13591	0.0976952	1.05316	610.921	646.007	80.6226	0	0
678	3.55847e+06	5.38869e+06	Kuchen	0	11.4148	3	0.333333	1	0	0.6	12079.7	1.18824e+06	0.0115027	1.02878	1.52941	0.11358	1.13072	36.0555	560.022	54.0833	0	0
679	3.53888e+06	5.39725e+06	Ebersbach an der Fils	0	11.6887	3	0.288136	0.571429	0	0.370787	4500.7	59622.9	0.0387015	1.1282	1.82888	0.0992791	1.14139	122.577	106.066	106.066	0	0
680	3.52617e+06	5.37772e+06	Dettingen an der Erms	0	8.66743	4	0.230769	0.166667	1	0.159091	10280.9	829066	0.00919869	1.25849	1.75538	0.113123	1.88725	346.446	1475.85	58.3095	0	0
681	3.54145e+06	5.38163e+06	Neidlingen	0	12.4308	3	0.2	0.157143	1	0.114286	2195.3	122806	0.0188951	1.31936	1.78261	0.10745	0.909091	335.41	759.951	236.485	0	0
682	3.52525e+06	5.38589e+06	Nürtingen	0	9.53247	3	0.2	0.22314	0.315789	0.226277	1553.3	76809.1	0.0229895	1.36016	1.73962	0.12287	1.1157	42.72	596.196	38.0789	0	0
683	3.53023e+06	5.38386e+06	Beuren	1	4.5731	3	0.076923	0.333333	0.333333	0.195652	1118.6	141384	0.0224908	1.14684	1.5569	0.11726	1.02703	2046.47	453.1	333.054	0	0
684	3.52442e+06	5.38167e+06	Frickenhausen	0	3.01981	3	0.125	0.076923	0.5	0.054054	669.6	289170	0.0107283	1.19047	1.7225	0.103565	1.05882	256.125	154.353	49.4975	0	0
685	3.55254e+06	5.39413e+06	Eislingen/ Fils	0	1.88542	2	0.225	0.75	0.6	0.395833	5160.1	135457	0.0228066	1.10179	1.50558	0.120292	1.10272	494.419	140.357	147.139	0	0
686	3.51998e+06	5.37287e+06	Eningen unter Achalm	0	6.08964	3	0.388889	0.6	0.4	0.392857	1281.3	327921	0.0123519	1.29455	1.67437	0.110704	1.02949	157.003	200.811	7.07107	0	0
687	3.52511e+06	5.37821e+06	Dettingen an der Erms	0	9.44985	3	0.230769	0.166667	1	0.159091	748.8	2.35355e+06	0.00791344	1.25849	1.75538	0.113123	1.88725	493.077	583.46	503.289	0	0
688	3.5246e+06	5.37792e+06	Dettingen an der Erms	0	8.93382	3	0.230769	0.166667	1	0.159091	427.7	2.35355e+06	0.00791344	1.25849	1.75538	0.113123	1.88725	459.837	35	35	0	0
689	3.53915e+06	5.39392e+06	Schlierbach	0	1.68464	3	0	0.333333	0	0.166667	1397.1	121258	0.0258702	1.39391	2.01306	0.0852391	1.14667	332.34	280.179	280.179	0	0
690	3.52283e+06	5.37403e+06	Metzingen	0	11.6014	3	0.2	0.214953	0.428571	0.165138	1440.9	586556	0.010557	1.18686	1.56641	0.121267	1.33648	196.023	462.088	147.139	0	0
691	3.54077e+06	5.3866e+06	Weilheim an der Teck	0	8.71044	3	0.297297	0.193798	0.230769	0.204545	904.5	421013	0.0168905	1.28113	1.82018	0.108577	1.03917	170.66	530	82.4621	0	0
692	3.51761e+06	5.37628e+06	Reutlingen	0	6.45251	3	0.21978	0.19774	0.205882	0.215686	2246.4	2920.07	0.125671	1.23563	1.5396	0.120979	1.29265	444.325	691.393	77.7817	0	0
693	3.54772e+06	5.3953e+06	Göppingen	0	13.4461	3	0.245902	0.57377	0.315789	0.36875	8190.3	521299	0.0169237	1.02208	1.4472	0.138668	1.15129	145.774	475.395	132.853	0	0
694	3.51152e+06	5.37166e+06	Reutlingen	0	3.28308	2	0.21978	0.19774	0.205882	0.215686	1278.3	19469.2	0.032615	1.23563	1.5396	0.120979	1.29265	432.897	499.049	58.3095	0	0
695	3.54058e+06	5.38666e+06	Weilheim an der Teck	0	6.53075	3	0.297297	0.193798	0.230769	0.204545	787.4	421013	0.0168905	1.28113	1.82018	0.108577	1.03917	63.6396	495.807	76.4853	0	0
696	3.52854e+06	5.38739e+06	Nürtingen	0	14.7096	3	0.2	0.22314	0.315789	0.226277	1151	202237	0.0144545	1.36016	1.73962	0.12287	1.1157	62.6498	634.606	93.4077	0	0
697	3.51512e+06	5.36845e+06	Pfullingen	0	6.24099	3	0.363636	0.576923	0.285714	0.567568	1594.1	349775	0.0184245	1.16265	1.70163	0.117938	1.10118	300.167	77.6209	77.6209	0	0
698	3.52526e+06	5.38081e+06	Kohlberg	0	12.242	3	0.25	0.076923	0	0.035714	811.4	1.20814e+06	0.013945	1.33489	1.88101	0.109253	1.40323	170	515.8	74.3303	0	0
699	3.54513e+06	5.39132e+06	Boll	0	1.30143	3	0.285714	2.5	1	0.538462	4729	71265.4	0.0438775	1.35042	1.91502	0.160651	1.21591	560	195.064	166.433	0	0
700	3.50444e+06	5.36166e+06	Mössingen	0	11.648	4	0.304348	0.11465	0	0.151316	8593.8	1.71355e+06	0.0133141	1.60177	2.13591	0.0976952	1.05316	630.971	1386.98	28.2843	0	1
701	3.51962e+06	5.37391e+06	Eningen unter Achalm	1	11.1046	3	0.388889	0.6	0.4	0.392857	6109.9	32302.8	0.0338477	1.29455	1.67437	0.110704	1.02949	913.592	248.244	248.244	0	0
702	3.50817e+06	5.36947e+06	Gomaringen	0	2.92378	3	0.25	0.196429	0.5	0.155172	1501.9	146664	0.0146182	1.48373	1.85863	0.0970857	1.08571	25	44.7214	10	0	0
703	3.55704e+06	5.39155e+06	Gingen an der Fils	0	3.26418	2	0.25	0.588235	0	0.535714	1524.4	544352	0.0179697	1.1043	1.56275	0.127738	1.25	152.971	208.626	165.529	0	0
704	3.51606e+06	5.36825e+06	Pfullingen	0	9.13995	3	0.363636	0.576923	0.285714	0.567568	766.4	520492	0.0100736	1.16265	1.70163	0.117938	1.10118	93.9415	186.011	90.1388	0	0
705	3.53221e+06	5.39354e+06	Wernau (Neckar)	0	22.5822	3	0.285714	0.214286	0	0.384615	106472	71285.7	0.0209029	0.987809	1.53707	0.0834862	1.16606	471.858	550.568	60	0	0
706	3.50584e+06	5.36492e+06	Nehren	0	12.3149	3	0	0	0	0	1793.6	1.29779e+06	0.0060432	1.69551	2.29424	0.103814	1.45652	626.039	821.005	161.555	0	0
707	3.52669e+06	5.37952e+06	Neuffen	0	3.87732	3	0.333333	0.326531	0.333333	0.222222	1705.3	674506	0.0153244	1.28788	1.79529	0.111786	1.13303	401.808	472.017	75	0	0
708	3.52642e+06	5.38657e+06	Nürtingen	1	16.1892	0	0.2	0.22314	0.315789	0.226277	0	105802	0.0227242	1.36016	1.73962	0.12287	1.1157	235.478	288.444	85.5862	0	0
709	3.50451e+06	5.3622e+06	Mössingen	0	3.13128	3	0.304348	0.11465	0	0.151316	1622.8	1.71355e+06	0.0133141	1.60177	2.13591	0.0976952	1.05316	93.4077	1025.05	58.3095	0	0
710	3.5175e+06	5.38179e+06	Reutlingen	0	11.1119	3	0.21978	0.19774	0.205882	0.215686	137610	44754.8	0.0224271	1.23563	1.5396	0.120979	1.29265	664.078	764.853	10	0	0
711	3.53015e+06	5.38945e+06	Kirchheim unter Teck	1	4.85932	2	0.181818	0.241379	0.181818	0.245098	2016	21943.9	0.0436258	1.22208	1.69769	0.119627	1.30893	317.569	230.868	230.868	0	0
712	3.52666e+06	5.38218e+06	Frickenhausen	0	24.9922	3	0.125	0.076923	0.5	0.054054	873.7	1.34387e+06	0.00860131	1.19047	1.7225	0.103565	1.05882	398.246	823.787	21.2132	0	0
713	3.50295e+06	5.36729e+06	Dußlingen	0	2.19428	3	0.2	0.128205	0	0.090909	1009.3	444598	0.020699	1.22642	1.77338	0.102978	0.989209	843.045	1375.25	264.008	0	0
714	3.49706e+06	5.36204e+06	Bodelshausen	0	1.90414	3	0.5	0.037037	0	0.25	697.3	97033.9	0.0257311	1.62158	2.06108	0.103155	1.18996	362.25	893.085	15	0	0
715	3.53115e+06	5.39213e+06	Kirchheim unter Teck	1	4.11585	2	0.181818	0.241379	0.181818	0.245098	1535.4	163767	0.0222553	1.22208	1.69769	0.119627	1.30893	332.866	324.076	324.076	0	0
716	3.50635e+06	5.36197e+06	Mössingen	0	9.81806	3	0.304348	0.11465	0	0.151316	108246	1.71355e+06	0.0133141	1.60177	2.13591	0.0976952	1.05316	1368.11	569.495	300.167	0	1
717	3.53414e+06	5.39109e+06	Kirchheim unter Teck	0	4.93142	3	0.181818	0.241379	0.181818	0.245098	14772.2	285161	0.00989804	1.22208	1.69769	0.119627	1.30893	167.631	210.772	57.0088	0	0
718	3.50185e+06	5.36373e+06	Ofterdingen	0	6.60332	3	0.363636	0.076923	1	0.142857	1484.5	63683.6	0.0262974	1.64931	2.09688	0.10547	0.946809	405.123	380.033	327.758	0	0
719	3.54368e+06	5.39058e+06	Zell unter Aichelberg	1	5.14129	3	0.266667	0.291667	0	0.297297	18289.5	36443.3	0.0454609	2.1257	2.71429	0.101889	1.52475	303.645	1071.19	63.2456	0	0
720	3.55211e+06	5.39006e+06	Schlat	1	4.76229	3	0.5	0.363636	0	0.361111	19290.9	15690.1	0.0586863	1.21365	1.90775	0.123203	1.17333	254.558	200.562	130	0	0
721	3.53544e+06	5.3854e+06	Bissingen an der Teck	1	4.64457	3	0.333333	0.212766	0.5	0.254237	7291.3	1.06197e+06	0.0117425	1.35031	1.68719	0.114481	0.989418	570	710.229	177.2	0	0
722	3.52599e+06	5.38015e+06	Neuffen	0	3.01862	3	0.333333	0.326531	0.333333	0.222222	17095.1	1.20814e+06	0.013945	1.28788	1.79529	0.111786	1.13303	266.177	101.98	11.1803	0	0
723	3.5175e+06	5.36893e+06	Pfullingen	0	10.0385	3	0.363636	0.576923	0.285714	0.567568	577.1	1.02441e+06	0.00879794	1.16265	1.70163	0.117938	1.10118	132.004	94.8683	94.8683	0	0
724	3.53447e+06	5.39138e+06	Kirchheim unter Teck	0	3.25891	0	0.181818	0.241379	0.181818	0.245098	2628.8	285161	0.00989804	1.22208	1.69769	0.119627	1.30893	467.6	403.887	77.7817	0	0
725	3.52795e+06	5.38424e+06	Frickenhausen	0	9.06399	3	0.125	0.076923	0.5	0.054054	1245.3	1.08813e+06	0.00929233	1.19047	1.7225	0.103565	1.05882	725.017	1207.36	7.07107	0	0
726	3.53419e+06	5.38121e+06	Lenningen	0	15.2451	3	0.277778	0.221311	0	0.288288	401.3	1.54264e+06	0.0133674	1.09145	1.55231	0.106074	0.965142	51.4781	356.09	91.7878	0	0
727	3.50436e+06	5.36403e+06	Mössingen	0	2.84982	3	0.304348	0.11465	0	0.151316	1861.5	1.29779e+06	0.0060432	1.60177	2.13591	0.0976952	1.05316	40	20	20	0	0
728	3.51818e+06	5.36829e+06	Pfullingen	0	7.04898	3	0.363636	0.576923	0.285714	0.567568	1581.8	1.02441e+06	0.00879794	1.16265	1.70163	0.117938	1.10118	755.414	615.183	190.066	0	0
729	3.53452e+06	5.39275e+06	Notzingen	0	4.92204	3	0.2	0.16	0	0.181818	2209.6	18118.1	0.0367268	1.58633	2.37363	0.106287	1.20792	60	137.295	135	0	0
730	3.50964e+06	5.3719e+06	Kusterdingen	0	9.65862	3	0.259259	0.168675	1	0.153226	75994	774234	0.0129779	1.39645	1.80254	0.10766	1.5061	583.095	808.486	349.285	0	0
731	3.50875e+06	5.36828e+06	Gomaringen	0	3.65856	2	0.25	0.196429	0.5	0.155172	1876	154578	0.0124705	1.48373	1.85863	0.0970857	1.08571	595.336	220.511	220.511	0	0
732	3.51889e+06	5.37813e+06	Metzingen	0	7.48876	3	0.2	0.214953	0.428571	0.165138	6071.5	761523	0.0136683	1.18686	1.56641	0.121267	1.33648	875.685	196.787	51.4781	0	0
733	3.53686e+06	5.39442e+06	Ebersbach an der Fils	1	2.39275	0	0.288136	0.571429	0	0.370787	569.3	20066.8	0.0347164	1.1282	1.82888	0.0992791	1.14139	0	250.45	10	0	0
734	3.50618e+06	5.36199e+06	Mössingen	0	10.3954	4	0.304348	0.11465	0	0.151316	8918	1.71355e+06	0.0133141	1.60177	2.13591	0.0976952	1.05316	1341.05	687.186	136.473	0	1
735	3.52734e+06	5.38784e+06	Nürtingen	1	3.99623	3	0.2	0.22314	0.315789	0.226277	4447	560943	0.0180042	1.36016	1.73962	0.12287	1.1157	323.883	15	15	0	0
736	3.55707e+06	5.39256e+06	Gingen an der Fils	0	2.58877	2	0.25	0.588235	0	0.535714	65130.5	243599	0.019395	1.1043	1.56275	0.127738	1.25	115.974	346.013	162.25	0	0
737	3.52309e+06	5.37451e+06	Metzingen	1	2.77682	0	0.2	0.214953	0.428571	0.165138	2443.4	242372	0.0124457	1.18686	1.56641	0.121267	1.33648	0	94.8683	0	0	0
738	3.50434e+06	5.36105e+06	Mössingen	0	13.4773	4	0.304348	0.11465	0	0.151316	13475.6	101634	0.0179874	1.60177	2.13591	0.0976952	1.05316	979.247	1847.12	7.07107	0	1
739	3.55972e+06	5.39405e+06	Donzdorf	0	6.38016	3	0.327273	0.537037	0	0.479592	65587.7	3726.01	0.0789493	1.1454	1.8843	0.103731	1.31707	25	523.689	22.3607	0	0
740	3.52736e+06	5.37837e+06	Neuffen	0	10.5839	3	0.333333	0.326531	0.333333	0.222222	1736.4	1.04757e+06	0.0118645	1.28788	1.79529	0.111786	1.13303	728.577	1288.69	320.156	0	0
741	3.52357e+06	5.3789e+06	Neuffen	0	8.89676	3	0.333333	0.326531	0.333333	0.222222	2926.6	2.35355e+06	0.00791344	1.28788	1.79529	0.111786	1.13303	597.369	123.491	123.491	0	0
742	3.52409e+06	5.38002e+06	Kohlberg	0	8.12734	3	0.25	0.076923	0	0.035714	1188.3	305005	0.0192568	1.33489	1.88101	0.109253	1.40323	277.849	98.9949	98.9949	0	0
743	3.53278e+06	5.38533e+06	Dettingen unter Teck	0	4.42996	3	0.2	0.049296	0	0.107692	406.6	1.70997e+06	0.00989906	1.37194	1.76895	0.12934	1.03196	684.124	596.196	128.55	0	0
744	3.52661e+06	5.37759e+06	Dettingen an der Erms	0	8.32276	3	0.230769	0.166667	1	0.159091	1288.4	829066	0.00919869	1.25849	1.75538	0.113123	1.88725	235.372	1621.68	46.0977	0	0
745	3.53016e+06	5.38972e+06	Kirchheim unter Teck	0	3.77002	2	0.181818	0.241379	0.181818	0.245098	610.3	80538.4	0.0242076	1.22208	1.69769	0.119627	1.30893	66.7083	353.023	139.284	0	0
746	3.53035e+06	5.38603e+06	Dettingen unter Teck	1	32.0431	0	0.2	0.049296	0	0.107692	2754	28422.2	0.0323166	1.37194	1.76895	0.12934	1.03196	2159.32	1545.03	198.305	0	0
747	3.53373e+06	5.38062e+06	Lenningen	0	19.1905	3	0.277778	0.221311	0	0.288288	889.4	530404	0.0193153	1.09145	1.55231	0.106074	0.965142	142.215	308.585	25.4951	0	0
748	3.54035e+06	5.38711e+06	Weilheim an der Teck	0	2.72495	3	0.297297	0.193798	0.230769	0.204545	2311.8	421013	0.0168905	1.28113	1.82018	0.108577	1.03917	93.0054	275.772	125.1	0	0
749	3.53439e+06	5.39153e+06	Kirchheim unter Teck	1	6.07427	3	0.181818	0.241379	0.181818	0.245098	6210.1	189015	0.0181657	1.22208	1.69769	0.119627	1.30893	411.4	572.385	55	0	0
750	3.5326e+06	5.38406e+06	Owen	0	21.8819	4	0.133333	0.47619	1	0.354167	79.2	1.39443e+06	0.0107842	1.31243	1.74632	0.117756	1.05	221.359	595	71.5891	0	0
751	3.54624e+06	5.39478e+06	Göppingen	1	2.43554	3	0.245902	0.57377	0.315789	0.36875	25862.9	19223.3	0.0456257	1.02208	1.4472	0.138668	1.15129	21.2132	18.0278	18.0278	0	0
752	3.53862e+06	5.38436e+06	Bissingen an der Teck	0	5.46274	3	0.333333	0.212766	0.5	0.254237	6774.7	210695	0.0113736	1.35031	1.68719	0.114481	0.989418	950.158	1345.46	5	0	1
753	3.5099e+06	5.36779e+06	Reutlingen	0	1.09026	3	0.21978	0.19774	0.205882	0.215686	4213.9	319415	0.00880317	1.23563	1.5396	0.120979	1.29265	321.636	429.331	56.5685	0	0
754	3.53555e+06	5.39113e+06	Kirchheim unter Teck	0	5.02874	3	0.181818	0.241379	0.181818	0.245098	7016	96536.3	0.0231511	1.22208	1.69769	0.119627	1.30893	572.385	279.866	40	0	0
755	3.50286e+06	5.36671e+06	Dußlingen	0	2.79141	2	0.2	0.128205	0	0.090909	974.3	444598	0.020699	1.22642	1.77338	0.102978	0.989209	1137.51	1260.8	150	0	0
756	3.54648e+06	5.39286e+06	Heiningen	1	10.9989	3	0.185185	0.526316	1	0.348837	8649.4	103615	0.0409819	1.53551	2.04153	0.103488	1.07647	618.324	711.512	5	0	0
757	3.51191e+06	5.37542e+06	Wannweil	0	11.4154	3	0.5	0.2	0.2	0.166667	931.2	91018.3	0.0290479	1.10228	1.56674	0.126792	1.42478	159.531	360.451	159.531	0	0
758	3.51574e+06	5.36738e+06	Pfullingen	0	9.01505	3	0.363636	0.576923	0.285714	0.567568	1632.9	520492	0.0100736	1.16265	1.70163	0.117938	1.10118	337.676	88.6002	60.208	0	0
759	3.5246e+06	5.37655e+06	Dettingen an der Erms	0	8.80497	3	0.230769	0.166667	1	0.159091	2528.6	1.10291e+06	0.0123476	1.25849	1.75538	0.113123	1.88725	196.469	65	65	0	0
760	3.50812e+06	5.36912e+06	Gomaringen	0	5.52402	3	0.25	0.196429	0.5	0.155172	1082.8	146664	0.0146182	1.48373	1.85863	0.0970857	1.08571	26.9258	310.645	80.6226	0	0
761	3.51806e+06	5.36827e+06	Pfullingen	0	5.09976	3	0.363636	0.576923	0.285714	0.567568	2319.3	1.02441e+06	0.00879794	1.16265	1.70163	0.117938	1.10118	636.259	521.177	91.9239	0	0
762	3.51099e+06	5.37485e+06	Wannweil	0	17.6547	0	0.5	0.2	0.2	0.166667	0	359132	0.0117938	1.10228	1.56674	0.126792	1.42478	417.433	930.188	445.702	0	0
763	3.51538e+06	5.36759e+06	Pfullingen	0	4.41173	3	0.363636	0.576923	0.285714	0.567568	1062.1	520492	0.0100736	1.16265	1.70163	0.117938	1.10118	519.711	330.946	219.829	0	0
764	3.51731e+06	5.37378e+06	Reutlingen	0	5.232	0	0.21978	0.19774	0.205882	0.215686	2496.6	851648	0.00670136	1.23563	1.5396	0.120979	1.29265	82.4621	186.682	10	0	0
765	3.53841e+06	5.39045e+06	Ohmden	1	6.48934	3	0.5	0.103448	0	0.148148	2764.5	584209	0.0130428	1.41308	2.06513	0.102155	1.23529	385.811	555.023	245.153	0	0
766	3.52602e+06	5.38223e+06	Frickenhausen	0	25.7477	0	0.125	0.076923	0.5	0.054054	2125.1	1.34387e+06	0.00860131	1.19047	1.7225	0.103565	1.05882	963.172	984.124	148.408	0	0
767	3.51283e+06	5.37159e+06	Reutlingen	0	4.77726	3	0.21978	0.19774	0.205882	0.215686	1307.9	85154.8	0.0264718	1.23563	1.5396	0.120979	1.29265	651.038	896.674	300.541	0	0
768	3.54585e+06	5.39135e+06	Göppingen	1	4.23202	3	0.245902	0.57377	0.315789	0.36875	2473.6	26568.1	0.0322786	1.02208	1.4472	0.138668	1.15129	747.412	522.398	120.416	0	0
769	3.53449e+06	5.39008e+06	Kirchheim unter Teck	1	7.84317	3	0.181818	0.241379	0.181818	0.245098	650.1	394274	0.0145663	1.22208	1.69769	0.119627	1.30893	46.0977	197.8	88.6002	0	0
770	3.51496e+06	5.36794e+06	Pfullingen	0	3.14998	3	0.363636	0.576923	0.285714	0.567568	780.9	7087.74	0.0532061	1.16265	1.70163	0.117938	1.10118	657.761	352.456	190.394	0	0
771	3.50402e+06	5.36906e+06	Dußlingen	0	6.9388	3	0.2	0.128205	0	0.090909	836.9	247311	0.0192261	1.22642	1.77338	0.102978	0.989209	207.002	595.525	222.767	0	0
772	3.506e+06	5.36486e+06	Nehren	0	4.28458	0	0	0	0	0	551	1.29779e+06	0.0060432	1.69551	2.29424	0.103814	1.45652	773.983	902.026	10	0	0
773	3.50139e+06	5.36606e+06	Ofterdingen	0	2.59947	0	0.363636	0.076923	1	0.142857	0	908719	0.0134922	1.64931	2.09688	0.10547	0.946809	971.236	1391.71	245	0	1
774	3.54156e+06	5.3835e+06	Neidlingen	0	22.4079	4	0.2	0.157143	1	0.114286	86822.2	881477	0.0160684	1.31936	1.78261	0.10745	0.909091	244.387	424.264	117.047	0	0
775	3.50415e+06	5.36578e+06	Nehren	0	23.8823	3	0	0	0	0	1361.7	309862	0.009615	1.69551	2.29424	0.103814	1.45652	295.169	316.228	166.208	0	0
776	3.5454e+06	5.39744e+06	Göppingen	1	17.025	0	0.245902	0.57377	0.315789	0.36875	1998.7	175505	0.0147344	1.02208	1.4472	0.138668	1.15129	22.3607	74.3303	53.8516	0	0
777	3.53305e+06	5.39187e+06	Notzingen	0	9.70858	3	0.2	0.16	0	0.181818	4105.8	97371.2	0.0324604	1.58633	2.37363	0.106287	1.20792	335.596	577.603	145	0	0
778	3.53419e+06	5.38206e+06	Lenningen	0	14.4325	3	0.277778	0.221311	0	0.288288	1092.8	1.54264e+06	0.0133674	1.09145	1.55231	0.106074	0.965142	147.054	425.47	143.962	0	0
779	3.5221e+06	5.3746e+06	Metzingen	0	10.1906	3	0.2	0.214953	0.428571	0.165138	285.5	586556	0.010557	1.18686	1.56641	0.121267	1.33648	539.351	38.0789	38.0789	0	0
780	3.51562e+06	5.37026e+06	Pfullingen	0	9.71213	0	0.363636	0.576923	0.285714	0.567568	712.2	898104	0.00809342	1.16265	1.70163	0.117938	1.10118	182.483	792.67	222.036	0	0
781	3.53196e+06	5.38349e+06	Owen	0	0.684501	3	0.133333	0.47619	1	0.354167	1754.2	1.39443e+06	0.0107842	1.31243	1.74632	0.117756	1.05	898.693	582.516	38.0789	0	0
782	3.55762e+06	5.39245e+06	Süßen	0	1.50381	2	0.166667	0.428571	0.333333	0.243243	2078.2	35476.1	0.0367002	1.2209	1.69688	0.108562	1.57604	145.344	753.558	202.485	0	0
783	3.50484e+06	5.36686e+06	Nehren	0	5.23115	3	0	0	0	0	4495.4	109804	0.0246954	1.69551	2.29424	0.103814	1.45652	302.696	346.699	150.416	0	0
784	3.55838e+06	5.38831e+06	Kuchen	0	10.1749	3	0.333333	1	0	0.6	1020.8	1.18824e+06	0.0115027	1.02878	1.52941	0.11358	1.13072	98.4886	933.408	60.4152	0	0
785	3.54257e+06	5.3941e+06	Uhingen	1	9.08898	3	0.380952	0.264706	0.8	0.318841	2649.5	20443.6	0.0330489	1.16457	1.74023	0.104612	1.14191	57.0088	295.042	83.8153	0	0
786	3.52921e+06	5.39159e+06	Wendlingen am Neckar	0	5.26747	2	0.357143	0.071429	0.333333	0.375	784.5	403361	0.00978381	1.17744	1.7408	0.0861055	1.28011	555	595.189	65	0	0
787	3.527e+06	5.3808e+06	Neuffen	0	8.15694	3	0.333333	0.326531	0.333333	0.222222	1205.3	1.20814e+06	0.013945	1.28788	1.79529	0.111786	1.13303	176.139	775.258	214.709	0	0
788	3.52597e+06	5.37754e+06	Dettingen an der Erms	0	24.1188	3	0.230769	0.166667	1	0.159091	406.3	829066	0.00919869	1.25849	1.75538	0.113123	1.88725	125.1	1243.59	51.4781	0	0
789	3.53202e+06	5.39335e+06	Wernau (Neckar)	0	8.85074	3	0.285714	0.214286	0	0.384615	5242.8	48091.4	0.0248862	0.987809	1.53707	0.0834862	1.16606	411.643	290.689	112.805	0	0
790	3.53494e+06	5.39409e+06	Hochdorf	0	9.12796	3	0.052632	0.307692	1	0.129032	3254.6	123029	0.0165651	1.34266	2.08222	0.0941176	1.33333	611.658	951.381	75	0	0
791	3.54091e+06	5.38496e+06	Weilheim an der Teck	0	2.76093	3	0.297297	0.193798	0.230769	0.204545	1667.3	416375	0.00954846	1.28113	1.82018	0.108577	1.03917	1066.08	416.923	25	0	0
792	3.53408e+06	5.39239e+06	Notzingen	1	3.35161	2	0.2	0.16	0	0.181818	698.3	57444.9	0.0209581	1.58633	2.37363	0.106287	1.20792	115	242.539	186.815	0	0
793	3.51127e+06	5.36929e+06	Reutlingen	0	12.2005	3	0.21978	0.19774	0.205882	0.215686	286451	39939.9	0.0277773	1.23563	1.5396	0.120979	1.29265	1221.82	155.242	60.208	0	0
794	3.51592e+06	5.3773e+06	Reutlingen	0	1.89091	2	0.21978	0.19774	0.205882	0.215686	2121.3	61020.4	0.0220302	1.23563	1.5396	0.120979	1.29265	533.69	170	11.1803	0	0
795	3.54109e+06	5.38527e+06	Weilheim an der Teck	0	8.38471	3	0.297297	0.193798	0.230769	0.204545	2131.4	416375	0.00954846	1.28113	1.82018	0.108577	1.03917	990.202	468.402	230.217	0	0
796	3.52778e+06	5.38853e+06	Oberboihingen	0	11.6531	3	0.285714	0.357143	0	0.444444	1157	136649	0.0200102	1.40177	1.84244	0.101036	1.11644	371.652	335.037	335.037	0	0
797	3.52828e+06	5.38227e+06	Frickenhausen	0	6.20602	3	0.125	0.076923	0.5	0.054054	1140.7	249663	0.0175127	1.19047	1.7225	0.103565	1.05882	413.673	180.693	120.416	0	0
798	3.50847e+06	5.36364e+06	Mössingen	0	10.2678	3	0.304348	0.11465	0	0.151316	2969.8	8702.45	0.043026	1.60177	2.13591	0.0976952	1.05316	104.043	562.25	72.8011	0	0
799	3.5068e+06	5.36404e+06	Mössingen	0	9.76497	3	0.304348	0.11465	0	0.151316	980.5	373172	0.0131412	1.60177	2.13591	0.0976952	1.05316	364.966	457.739	234.307	0	0
800	3.54182e+06	5.39038e+06	Zell unter Aichelberg	1	2.34516	3	0.266667	0.291667	0	0.297297	4361.1	18031.4	0.0310058	2.1257	2.71429	0.101889	1.52475	44.7214	88.6002	57.0088	0	0
801	3.54584e+06	5.39958e+06	Wangen	0	3.57923	3	0.136364	0.277778	0	0.230769	2167.8	13980.7	0.0419633	1.16083	1.83166	0.11236	1.1783	230.868	76.1577	76.1577	0	0
802	3.53824e+06	5.39213e+06	Schlierbach	0	4.23375	3	0	0.333333	0	0.166667	778.1	440253	0.01217	1.39391	2.01306	0.0852391	1.14667	400.281	756.108	25.4951	0	0
803	3.52303e+06	5.38053e+06	Kohlberg	0	11.619	3	0.25	0.076923	0	0.035714	1090.7	43616.4	0.0228103	1.33489	1.88101	0.109253	1.40323	95.5249	145.774	91.7878	0	0
804	3.505e+06	5.36239e+06	Mössingen	0	5.66791	3	0.304348	0.11465	0	0.151316	1126.6	1.71355e+06	0.0133141	1.60177	2.13591	0.0976952	1.05316	277.714	1089.6	317.569	0	0
805	3.52271e+06	5.37389e+06	Metzingen	0	10.545	3	0.2	0.214953	0.428571	0.165138	688.3	586556	0.010557	1.18686	1.56641	0.121267	1.33648	361.386	631.447	146.373	0	0
806	3.53214e+06	5.3935e+06	Wernau (Neckar)	0	17.2889	3	0.285714	0.214286	0	0.384615	106472	71285.7	0.0209029	0.987809	1.53707	0.0834862	1.16606	426.175	481.274	30	0	0
807	3.52266e+06	5.382e+06	Grafenberg	1	2.23485	3	0	0.277778	0	0.235294	3776.9	154834	0.0158321	1.70392	2.09511	0.0979192	1.56897	360.555	903.549	233.345	0	0
808	3.55518e+06	5.39059e+06	Gingen an der Fils	0	12.0907	3	0.25	0.588235	0	0.535714	31772.6	33119.2	0.0376697	1.1043	1.56275	0.127738	1.25	125.399	178.885	178.885	0	0
809	3.53432e+06	5.38131e+06	Lenningen	0	16.4625	3	0.277778	0.221311	0	0.288288	1862.6	1.54264e+06	0.0133674	1.09145	1.55231	0.106074	0.965142	215.058	520.096	253.87	0	0
810	3.53389e+06	5.38285e+06	Owen	0	14.6468	2	0.133333	0.47619	1	0.354167	520.2	2.05861e+06	0.00932867	1.31243	1.74632	0.117756	1.05	225.887	416.923	245.204	0	0
811	3.53178e+06	5.38945e+06	Kirchheim unter Teck	1	29.6411	0	0.181818	0.241379	0.181818	0.245098	150563	29304.8	0.0241267	1.22208	1.69769	0.119627	1.30893	134.629	20.6155	20.6155	0	0
812	3.51915e+06	5.37084e+06	Eningen unter Achalm	0	3.84165	3	0.388889	0.6	0.4	0.392857	1159.6	538420	0.0157695	1.29455	1.67437	0.110704	1.02949	14.1421	629.96	11.1803	0	0
813	3.53557e+06	5.38557e+06	Bissingen an der Teck	1	2.11013	2	0.333333	0.212766	0.5	0.254237	6921	1.06197e+06	0.0117425	1.35031	1.68719	0.114481	0.989418	450.25	543.369	20.6155	0	0
814	3.53267e+06	5.38536e+06	Dettingen unter Teck	0	15.3375	3	0.2	0.049296	0	0.107692	1586.1	1.70997e+06	0.00989906	1.37194	1.76895	0.12934	1.03196	735.425	714.86	205.548	0	0
815	3.54724e+06	5.38881e+06	Dürnau	1	4.04508	3	0.461538	0.545455	1	0.5	2235.3	29012.9	0.0488332	1.42809	2.06038	0.0877763	1.47761	199.123	635.649	25	0	0
816	3.53756e+06	5.38984e+06	Ohmden	1	11.1461	3	0.5	0.103448	0	0.148148	944.8	84946	0.0293974	1.41308	2.06513	0.102155	1.23529	556.44	151.822	151.822	1	0
817	3.5267e+06	5.37808e+06	Dettingen an der Erms	0	6.92429	0	0.230769	0.166667	1	0.159091	0	829066	0.00919869	1.25849	1.75538	0.113123	1.88725	710.634	1796.62	146.373	0	0
818	3.51527e+06	5.36848e+06	Pfullingen	0	8.83802	0	0.363636	0.576923	0.285714	0.567568	1487.7	349775	0.0184245	1.16265	1.70163	0.117938	1.10118	140.801	69.6419	69.6419	0	0
819	3.52294e+06	5.37423e+06	Metzingen	0	6.25868	3	0.2	0.214953	0.428571	0.165138	485.2	586556	0.010557	1.18686	1.56641	0.121267	1.33648	61.0328	255.049	60.8276	0	0
820	3.5061e+06	5.36551e+06	Nehren	0	5.7298	3	0	0	0	0	90588.3	1.29779e+06	0.0060432	1.69551	2.29424	0.103814	1.45652	387.105	706.045	107.355	0	0
821	3.5307e+06	5.38215e+06	Beuren	1	6.67346	3	0.076923	0.333333	0.333333	0.195652	529.4	508268	0.0193484	1.14684	1.5569	0.11726	1.02703	623.699	140.089	60.4152	0	0
822	3.53491e+06	5.39559e+06	Hochdorf	1	16.8098	0	0.052632	0.307692	1	0.129032	684.1	539415	0.0175797	1.34266	2.08222	0.0941176	1.33333	0	482.597	7.07107	0	0
823	3.54568e+06	5.38947e+06	Boll	0	2.15778	2	0.285714	2.5	1	0.538462	1000.3	68412.9	0.0244689	1.35042	1.91502	0.160651	1.21591	95.1315	205.548	125.399	0	0
824	3.54301e+06	5.39806e+06	Uhingen	1	8.09075	0	0.380952	0.264706	0.8	0.318841	590.9	44143.2	0.0449754	1.16457	1.74023	0.104612	1.14191	0	87.3212	25	0	0
825	3.50452e+06	5.3661e+06	Nehren	0	2.41876	3	0	0	0	0	1522.3	309862	0.009615	1.69551	2.29424	0.103814	1.45652	218.289	447.214	218.289	0	0
826	3.51778e+06	5.36962e+06	Pfullingen	0	10.107	3	0.363636	0.576923	0.285714	0.567568	728.2	1.02441e+06	0.00879794	1.16265	1.70163	0.117938	1.10118	10	604.07	40	0	0
827	3.5152e+06	5.36852e+06	Pfullingen	0	9.52473	3	0.363636	0.576923	0.285714	0.567568	662.8	349775	0.0184245	1.16265	1.70163	0.117938	1.10118	226.771	127.475	99.6243	0	0
828	3.53267e+06	5.3856e+06	Dettingen unter Teck	0	21.9143	3	0.2	0.049296	0	0.107692	1252.6	1.70997e+06	0.00989906	1.37194	1.76895	0.12934	1.03196	534.813	769.756	7.07107	0	0
829	3.51753e+06	5.37341e+06	Reutlingen	0	13.5198	0	0.21978	0.19774	0.205882	0.215686	5417.9	851648	0.00670136	1.23563	1.5396	0.120979	1.29265	272.029	65	44.7214	0	0
830	3.54774e+06	5.39547e+06	Göppingen	0	7.16308	3	0.245902	0.57377	0.315789	0.36875	9220.8	521299	0.0169237	1.02208	1.4472	0.138668	1.15129	250	303.645	78.2624	0	0
831	3.55349e+06	5.39372e+06	Eislingen/ Fils	0	6.72568	3	0.225	0.75	0.6	0.395833	21357.3	43098	0.0218803	1.10179	1.50558	0.120292	1.10272	664.116	91.9239	91.9239	0	0
832	3.54067e+06	5.3831e+06	Neidlingen	0	12.0909	3	0.2	0.157143	1	0.114286	5479.2	1.48249e+06	0.00924149	1.31936	1.78261	0.10745	0.909091	415.482	502.046	120.83	0	0
833	3.53556e+06	5.39107e+06	Kirchheim unter Teck	0	3.74628	3	0.181818	0.241379	0.181818	0.245098	2262	275546	0.0139559	1.22208	1.69769	0.119627	1.30893	544.518	338.378	15	0	0
834	3.52391e+06	5.37988e+06	Kohlberg	0	24.7283	4	0.25	0.076923	0	0.035714	669.4	305005	0.0192568	1.33489	1.88101	0.109253	1.40323	417.433	325.576	325.576	0	0
835	3.54657e+06	5.39018e+06	Dürnau	1	1.92211	3	0.461538	0.545455	1	0.5	23214.2	105007	0.0330621	1.42809	2.06038	0.0877763	1.47761	351.07	772.739	194.486	0	0
836	3.52739e+06	5.3846e+06	Frickenhausen	1	12.586	3	0.125	0.076923	0.5	0.054054	11350	1.08813e+06	0.00929233	1.19047	1.7225	0.103565	1.05882	192.419	916.856	120.83	0	0
837	3.52714e+06	5.37922e+06	Neuffen	0	4.93502	3	0.333333	0.326531	0.333333	0.222222	2279.3	674506	0.0153244	1.28788	1.79529	0.111786	1.13303	245.204	574.826	210.297	0	0
838	3.52476e+06	5.38076e+06	Kohlberg	0	10.3695	3	0.25	0.076923	0	0.035714	1579.3	1.20814e+06	0.013945	1.33489	1.88101	0.109253	1.40323	112.805	265.189	131.244	0	0
839	3.52029e+06	5.38264e+06	Bempflingen	1	4.54366	3	0.333333	0.363636	1	0.272727	13269.3	4499.55	0.063211	1.26159	1.79849	0.0983425	1.38889	453.982	171.026	152.971	0	0
840	3.53345e+06	5.38065e+06	Lenningen	1	4.73237	3	0.277778	0.221311	0	0.288288	778.4	530404	0.0193153	1.09145	1.55231	0.106074	0.965142	351.07	283.593	119.269	0	0
841	3.50126e+06	5.36047e+06	Mössingen	0	5.21488	3	0.304348	0.11465	0	0.151316	40034.6	581561	0.0200854	1.60177	2.13591	0.0976952	1.05316	1191.9	1479.95	57.0088	0	1
842	3.51293e+06	5.37201e+06	Reutlingen	0	4.57146	3	0.21978	0.19774	0.205882	0.215686	1870.4	597842	0.0117804	1.23563	1.5396	0.120979	1.29265	426.878	820	78.2624	0	0
843	3.54255e+06	5.3826e+06	Neidlingen	0	6.81494	3	0.2	0.157143	1	0.114286	1257.6	33166.4	0.0336158	1.31936	1.78261	0.10745	0.909091	87.3212	641.112	15	0	0
844	3.50499e+06	5.36675e+06	Nehren	0	5.13569	3	0	0	0	0	1209.8	109804	0.0246954	1.69551	2.29424	0.103814	1.45652	145.344	270.416	18.0278	0	0
845	3.51741e+06	5.37588e+06	Reutlingen	0	3.75636	3	0.21978	0.19774	0.205882	0.215686	862.3	99088	0.0182547	1.23563	1.5396	0.120979	1.29265	168.003	460.977	93.4077	0	0
846	3.54095e+06	5.38576e+06	Weilheim an der Teck	1	0.936514	3	0.297297	0.193798	0.230769	0.204545	1937.4	416375	0.00954846	1.28113	1.82018	0.108577	1.03917	577.17	103.078	14.1421	0	0
847	3.51756e+06	5.37168e+06	Eningen unter Achalm	0	8.91843	3	0.388889	0.6	0.4	0.392857	3361.9	783326	0.0104196	1.29455	1.67437	0.110704	1.02949	208.387	235.053	125.1	0	0
848	3.53145e+06	5.38612e+06	Dettingen unter Teck	0	11.3511	3	0.2	0.049296	0	0.107692	1032.9	1.70997e+06	0.00989906	1.37194	1.76895	0.12934	1.03196	1552.3	2076.25	402.492	0	0
849	3.54074e+06	5.39727e+06	Ebersbach an der Fils	0	1.53709	3	0.288136	0.571429	0	0.370787	2033.3	31445.2	0.0526	1.1282	1.82888	0.0992791	1.14139	75.1665	227.706	120.208	0	0
850	3.50689e+06	5.36426e+06	Mössingen	0	23.019	3	0.304348	0.11465	0	0.151316	1239.6	373172	0.0131412	1.60177	2.13591	0.0976952	1.05316	389.166	559.017	141.421	0	0
851	3.52752e+06	5.37839e+06	Neuffen	0	6.21973	3	0.333333	0.326531	0.333333	0.222222	2874.8	1.04757e+06	0.0118645	1.28788	1.79529	0.111786	1.13303	705.071	1181.03	174.929	0	0
852	3.51287e+06	5.37188e+06	Reutlingen	0	1.48678	3	0.21978	0.19774	0.205882	0.215686	3399.9	597842	0.0117804	1.23563	1.5396	0.120979	1.29265	494.217	955.471	65	0	0
853	3.54583e+06	5.39127e+06	Göppingen	1	1.24346	3	0.245902	0.57377	0.315789	0.36875	7987.8	26568.1	0.0322786	1.02208	1.4472	0.138668	1.15129	800	512.445	82.7647	0	0
854	3.5341e+06	5.38017e+06	Lenningen	1	11.6672	0	0.277778	0.221311	0	0.288288	2516.1	296509	0.0134553	1.09145	1.55231	0.106074	0.965142	5	143.265	65	0	0
855	3.55655e+06	5.39321e+06	Süßen	1	0.718445	0	0.166667	0.428571	0.333333	0.243243	1731.8	243599	0.019395	1.2209	1.69688	0.108562	1.57604	18.0278	379.111	40.3113	0	0
856	3.5335e+06	5.38472e+06	Dettingen unter Teck	1	1.20623	2	0.2	0.049296	0	0.107692	859.7	2.05861e+06	0.00932867	1.37194	1.76895	0.12934	1.03196	545.092	245.153	245.153	0	0
857	3.52316e+06	5.3783e+06	Metzingen	0	19.194	3	0.2	0.214953	0.428571	0.165138	1117.6	2.35355e+06	0.00791344	1.18686	1.56641	0.121267	1.33648	836.929	538.934	114.127	0	0
858	3.54095e+06	5.38404e+06	Weilheim an der Teck	0	18.6399	4	0.297297	0.193798	0.230769	0.204545	392	881477	0.0160684	1.28113	1.82018	0.108577	1.03917	615.325	278.658	278.658	0	0
859	3.55834e+06	5.39245e+06	Donzdorf	1	20.0592	3	0.327273	0.537037	0	0.479592	1771.3	51150.2	0.0271677	1.1454	1.8843	0.103731	1.31707	532.658	1343.5	178.885	0	0
860	3.55055e+06	5.39338e+06	Göppingen	1	13.9778	3	0.245902	0.57377	0.315789	0.36875	3425.4	504978	0.0167878	1.02208	1.4472	0.138668	1.15129	60	171.828	71.5891	0	0
861	3.54365e+06	5.39209e+06	Hattenhofen	0	10.4772	3	0.1	0.55	0	0.342105	12505.8	11879.8	0.043317	1.84567	2.32571	0.107832	1.25893	675.37	499.925	72.111	0	0
862	3.51681e+06	5.37915e+06	Reutlingen	0	6.00793	2	0.21978	0.19774	0.205882	0.215686	1265.2	38943.6	0.0231715	1.23563	1.5396	0.120979	1.29265	840.669	33.541	33.541	0	0
863	3.53474e+06	5.38236e+06	Lenningen	0	12.613	3	0.277778	0.221311	0	0.288288	2961.4	2.05861e+06	0.00932867	1.09145	1.55231	0.106074	0.965142	432.926	1012.63	454.01	0	0
864	3.55031e+06	5.39454e+06	Göppingen	0	9.85156	3	0.245902	0.57377	0.315789	0.36875	1864.6	504978	0.0167878	1.02208	1.4472	0.138668	1.15129	114.018	217.083	180.278	0	0
865	3.51067e+06	5.37243e+06	Kusterdingen	0	7.50006	3	0.259259	0.168675	1	0.153226	1121.8	774234	0.0129779	1.39645	1.80254	0.10766	1.5061	282.312	634.114	281.114	0	0
866	3.5321e+06	5.38673e+06	Dettingen unter Teck	0	13.9105	3	0.2	0.049296	0	0.107692	1742	1.70997e+06	0.00989906	1.37194	1.76895	0.12934	1.03196	702.602	1535	114.018	0	0
867	3.53959e+06	5.38505e+06	Weilheim an der Teck	0	9.34561	0	0.297297	0.193798	0.230769	0.204545	540.7	1.55086e+06	0.00669018	1.28113	1.82018	0.108577	1.03917	934.773	808.486	261.725	1	0
868	3.53901e+06	5.38599e+06	Weilheim an der Teck	1	4.48813	0	0.297297	0.193798	0.230769	0.204545	36834.9	1.55086e+06	0.00669018	1.28113	1.82018	0.108577	1.03917	0	351.746	72.8011	0	0
869	3.53244e+06	5.38626e+06	Dettingen unter Teck	0	11.0386	3	0.2	0.049296	0	0.107692	1462.3	1.70997e+06	0.00989906	1.37194	1.76895	0.12934	1.03196	568.001	1138.47	29.1548	0	0
870	3.52818e+06	5.37835e+06	Neuffen	0	7.63725	3	0.333333	0.326531	0.333333	0.222222	2304.7	1.04757e+06	0.0118645	1.28788	1.79529	0.111786	1.13303	610.082	765.506	237.171	0	0
871	3.53455e+06	5.39451e+06	Hochdorf	1	3.96989	0	0.052632	0.307692	1	0.129032	4362.4	123029	0.0165651	1.34266	2.08222	0.0941176	1.33333	208.147	619.395	0	0	0
872	3.50155e+06	5.3661e+06	Ofterdingen	0	1.67613	0	0.363636	0.076923	1	0.142857	0	908719	0.0134922	1.64931	2.09688	0.10547	0.946809	946.414	1410.89	290.172	0	0
873	3.538e+06	5.3947e+06	Ebersbach an der Fils	0	15.1721	3	0.288136	0.571429	0	0.370787	5796.7	160757	0.0210849	1.1282	1.82888	0.0992791	1.14139	718.905	307.612	33.541	0	0
874	3.5275e+06	5.38443e+06	Frickenhausen	0	12.7881	3	0.125	0.076923	0.5	0.054054	415.9	1.08813e+06	0.00929233	1.19047	1.7225	0.103565	1.05882	344.093	908.323	251.098	0	0
875	3.52787e+06	5.38376e+06	Frickenhausen	0	7.88561	3	0.125	0.076923	0.5	0.054054	683.5	1.08813e+06	0.00929233	1.19047	1.7225	0.103565	1.05882	642.359	970.464	195.256	0	0
876	3.51099e+06	5.37435e+06	Wannweil	0	1.07368	2	0.5	0.2	0.2	0.166667	1067.9	359132	0.0117938	1.10228	1.56674	0.126792	1.42478	302.035	754.255	215.87	0	0
877	3.53466e+06	5.38232e+06	Lenningen	0	11.9786	3	0.277778	0.221311	0	0.288288	1818.4	2.05861e+06	0.00932867	1.09145	1.55231	0.106074	0.965142	341.248	920.462	361.386	0	0
878	3.5323e+06	5.38526e+06	Dettingen unter Teck	0	15.1098	3	0.2	0.049296	0	0.107692	1402.8	1.70997e+06	0.00989906	1.37194	1.76895	0.12934	1.03196	1032.47	1049.4	215	0	0
879	3.5376e+06	5.3841e+06	Bissingen an der Teck	0	4.98357	3	0.333333	0.212766	0.5	0.254237	3040.6	188298	0.0141442	1.35031	1.68719	0.114481	0.989418	892.539	339.559	135	0	1
880	3.55703e+06	5.39281e+06	Gingen an der Fils	0	0.952215	2	0.25	0.588235	0	0.535714	1455.6	243599	0.019395	1.1043	1.56275	0.127738	1.25	179.025	478.357	285.044	0	0
881	3.52412e+06	5.3795e+06	Kohlberg	0	11.13	3	0.25	0.076923	0	0.035714	899.5	305005	0.0192568	1.33489	1.88101	0.109253	1.40323	160.078	93.4077	93.4077	0	0
882	3.52961e+06	5.38071e+06	Beuren	0	6.20644	3	0.076923	0.333333	0.333333	0.195652	1251.1	43527.2	0.0417922	1.14684	1.5569	0.11726	1.02703	150	527.755	21.2132	0	0
883	3.53811e+06	5.39708e+06	Ebersbach an der Fils	0	18.6424	3	0.288136	0.571429	0	0.370787	2036.8	81107	0.0218912	1.1282	1.82888	0.0992791	1.14139	165.68	35.3553	35.3553	0	0
884	3.52613e+06	5.3852e+06	Nürtingen	0	7.05424	3	0.2	0.22314	0.315789	0.226277	3464.7	49391.7	0.0274725	1.36016	1.73962	0.12287	1.1157	222.991	300	221.359	0	0
885	3.52072e+06	5.3725e+06	Eningen unter Achalm	0	3.79326	3	0.388889	0.6	0.4	0.392857	1020	205543	0.0124355	1.29455	1.67437	0.110704	1.02949	658.426	228.09	14.1421	0	0
886	3.53415e+06	5.37976e+06	Lenningen	0	12.8753	3	0.277778	0.221311	0	0.288288	344.2	296509	0.0134553	1.09145	1.55231	0.106074	0.965142	244.387	511.591	340	0	0
887	3.52711e+06	5.38754e+06	Nürtingen	0	7.14513	3	0.2	0.22314	0.315789	0.226277	1473	560943	0.0180042	1.36016	1.73962	0.12287	1.1157	216.91	245	237.539	0	0
888	3.5481e+06	5.3992e+06	Göppingen	0	5.76318	3	0.245902	0.57377	0.315789	0.36875	12770.9	15402.9	0.0586972	1.02208	1.4472	0.138668	1.15129	131.244	499.124	172.192	0	0
889	3.54556e+06	5.38861e+06	Boll	0	5.33308	3	0.285714	2.5	1	0.538462	1030.9	91272.5	0.0215616	1.35042	1.91502	0.160651	1.21591	40	276.812	90	0	0
890	3.51747e+06	5.38136e+06	Reutlingen	0	5.153	2	0.21978	0.19774	0.205882	0.215686	1916.4	127514	0.0122766	1.23563	1.5396	0.120979	1.29265	256.125	342.235	156.525	0	0
891	3.53494e+06	5.38214e+06	Lenningen	0	18.3699	3	0.277778	0.221311	0	0.288288	2278.1	1.54264e+06	0.0133674	1.09145	1.55231	0.106074	0.965142	625.66	1175.52	636.396	0	0
892	3.51957e+06	5.38468e+06	Neckartailfingen	0	11.509	0	0	0.210526	1	0.12	0	22169.6	0.030518	1.37146	1.88828	0.0926641	1.25	651.805	674.036	674.036	0	0
893	3.54004e+06	5.38553e+06	Weilheim an der Teck	0	26.8617	4	0.297297	0.193798	0.230769	0.204545	943.6	1.55086e+06	0.00669018	1.28113	1.82018	0.108577	1.03917	297.405	290.689	40	1	0
894	3.5538e+06	5.39306e+06	Süßen	1	1.74722	3	0.166667	0.428571	0.333333	0.243243	1039.3	41172.6	0.0209762	1.2209	1.69688	0.108562	1.57604	397.02	49.2443	35.3553	0	0
895	3.528e+06	5.37864e+06	Neuffen	0	6.47377	3	0.333333	0.326531	0.333333	0.222222	1465.4	1.04757e+06	0.0118645	1.28788	1.79529	0.111786	1.13303	350.571	685.055	72.111	0	0
896	3.50267e+06	5.36717e+06	Dußlingen	0	6.80564	3	0.2	0.128205	0	0.090909	653.8	444598	0.020699	1.22642	1.77338	0.102978	0.989209	1153.82	1649.08	151.162	0	0
897	3.51181e+06	5.36614e+06	Reutlingen	0	10.9093	3	0.21978	0.19774	0.205882	0.215686	1005.2	286101	0.0129011	1.23563	1.5396	0.120979	1.29265	86.3134	263.154	121.655	0	0
898	3.50544e+06	5.36271e+06	Mössingen	0	3.61439	3	0.304348	0.11465	0	0.151316	1219.3	1.71355e+06	0.0133141	1.60177	2.13591	0.0976952	1.05316	347.131	770.016	44.7214	0	0
899	3.51229e+06	5.37462e+06	Wannweil	0	9.62843	3	0.5	0.2	0.2	0.166667	1791.6	7034.09	0.0580283	1.10228	1.56674	0.126792	1.42478	118.533	201.246	127.769	0	0
900	3.51918e+06	5.38278e+06	Neckartenzlingen	0	8.27797	3	0	0.1	1	0.266667	874.4	319527	0.0177893	1.30354	1.90761	0.0887945	1.23404	365	556.058	57.0088	0	0
901	3.50465e+06	5.36592e+06	Nehren	0	1.63347	3	0	0	0	0	667.1	309862	0.009615	1.69551	2.29424	0.103814	1.45652	14.1421	450.389	30	0	0
902	3.53666e+06	5.38393e+06	Bissingen an der Teck	0	10.7674	3	0.333333	0.212766	0.5	0.254237	7931.2	534268	0.0160772	1.35031	1.68719	0.114481	0.989418	212.25	529.457	241.35	0	1
903	3.51685e+06	5.37787e+06	Reutlingen	0	7.85544	0	0.21978	0.19774	0.205882	0.215686	2147.5	112750	0.0191347	1.23563	1.5396	0.120979	1.29265	58.3095	375.033	90.1388	0	0
904	3.52774e+06	5.38407e+06	Frickenhausen	0	10.9576	3	0.125	0.076923	0.5	0.054054	5979.6	1.08813e+06	0.00929233	1.19047	1.7225	0.103565	1.05882	534.603	951.893	18.0278	0	0
905	3.52895e+06	5.39164e+06	Wendlingen am Neckar	1	1.18696	2	0.357143	0.071429	0.333333	0.375	1977	403361	0.00978381	1.17744	1.7408	0.0861055	1.28011	591.354	687.405	11.1803	0	0
906	3.51613e+06	5.36986e+06	Pfullingen	1	6.02982	0	0.363636	0.576923	0.285714	0.567568	908.5	898104	0.00809342	1.16265	1.70163	0.117938	1.10118	0	276.134	30	0	0
907	3.55598e+06	5.39196e+06	Gingen an der Fils	0	10.298	3	0.25	0.588235	0	0.535714	2392.4	544352	0.0179697	1.1043	1.56275	0.127738	1.25	905.539	678.859	625.72	0	0
908	3.52748e+06	5.37816e+06	Neuffen	0	10.5991	3	0.333333	0.326531	0.333333	0.222222	39186.6	1.04757e+06	0.0118645	1.28788	1.79529	0.111786	1.13303	930.215	1382	230.217	0	0
909	3.52461e+06	5.38178e+06	Frickenhausen	0	14.4657	3	0.125	0.076923	0.5	0.054054	941.5	289170	0.0107283	1.19047	1.7225	0.103565	1.05882	216.449	90	46.0977	0	0
910	3.51745e+06	5.37583e+06	Reutlingen	0	18.2579	3	0.21978	0.19774	0.205882	0.215686	440.1	99088	0.0182547	1.23563	1.5396	0.120979	1.29265	156.924	474.605	113.358	0	0
911	3.53375e+06	5.38345e+06	Owen	0	7.92117	3	0.133333	0.47619	1	0.354167	531.8	2.05861e+06	0.00932867	1.31243	1.74632	0.117756	1.05	65	88.6002	68.0074	0	0
912	3.53093e+06	5.38221e+06	Beuren	0	8.37479	3	0.076923	0.333333	0.333333	0.195652	109359	508268	0.0193484	1.14684	1.5569	0.11726	1.02703	850.088	80.6226	80.6226	0	0
913	3.51873e+06	5.38362e+06	Neckartenzlingen	0	6.83035	3	0	0.1	1	0.266667	1001.6	219352	0.0200933	1.30354	1.90761	0.0887945	1.23404	30.4138	25	25	0	0
914	3.50252e+06	5.36899e+06	Dußlingen	0	1.1006	3	0.2	0.128205	0	0.090909	1103.4	397964	0.0101867	1.22642	1.77338	0.102978	0.989209	1229.84	2061.22	279.33	0	0
915	3.52854e+06	5.38173e+06	Beuren	0	3.71037	3	0.076923	0.333333	0.333333	0.195652	6004.6	44977.6	0.0250465	1.14684	1.5569	0.11726	1.02703	454.01	546.443	152.971	0	0
916	3.52164e+06	5.37633e+06	Metzingen	1	6.29372	3	0.2	0.214953	0.428571	0.165138	791.1	505116	0.00726691	1.18686	1.56641	0.121267	1.33648	768.196	536.68	11.1803	0	0
917	3.51863e+06	5.38197e+06	Neckartenzlingen	0	7.05186	3	0	0.1	1	0.266667	2298.8	269162	0.020936	1.30354	1.90761	0.0887945	1.23404	234.307	230.054	230.054	0	0
918	3.52146e+06	5.37644e+06	Metzingen	0	9.86458	0	0.2	0.214953	0.428571	0.165138	5151	505116	0.00726691	1.18686	1.56641	0.121267	1.33648	700	453.982	18.0278	0	0
919	3.53817e+06	5.38241e+06	Bissingen an der Teck	0	13.4072	0	0.333333	0.212766	0.5	0.254237	0	40627.2	0.0350958	1.35031	1.68719	0.114481	0.989418	1408.9	1015.01	1015.01	0	1
920	3.53806e+06	5.3903e+06	Ohmden	1	3.74006	3	0.5	0.103448	0	0.148148	1434.7	584209	0.0130428	1.41308	2.06513	0.102155	1.23529	286.225	447.214	303.727	0	0
921	3.5196e+06	5.37848e+06	Metzingen	0	3.5553	3	0.2	0.214953	0.428571	0.165138	56172	761523	0.0136683	1.18686	1.56641	0.121267	1.33648	263.486	243.772	65	0	0
922	3.5194e+06	5.38372e+06	Altdorf	0	0.137771	2	0.6	0.04	0	0.142857	1591.7	219352	0.0200933	2.09142	2.66667	0.0938375	1.67647	387.105	96.1769	96.1769	0	0
923	3.51172e+06	5.37684e+06	Kirchentellinsfurt	1	18.1209	0	0	0	0	0	24317.9	85914.8	0.0256139	1.28644	1.87016	0.107269	1.17308	0	5	5	0	0
924	3.51982e+06	5.38089e+06	Riederich	0	3.12877	3	0	0	0	0	1151.2	25310	0.0367816	1.66874	2.11765	0.101444	1.31193	90	105	105	0	0
925	3.53185e+06	5.38587e+06	Dettingen unter Teck	0	12.9676	3	0.2	0.049296	0	0.107692	2937.2	1.70997e+06	0.00989906	1.37194	1.76895	0.12934	1.03196	1174.66	1625	87.4643	0	0
926	3.53104e+06	5.38652e+06	Dettingen unter Teck	0	20.1743	5	0.2	0.049296	0	0.107692	1767.2	111368	0.023383	1.37194	1.76895	0.12934	1.03196	1791.38	2232.58	481.664	0	0
927	3.52242e+06	5.37526e+06	Metzingen	0	6.70299	3	0.2	0.214953	0.428571	0.165138	651.3	227715	0.019749	1.18686	1.56641	0.121267	1.33648	306.349	350	166.208	0	0
928	3.5073e+06	5.36743e+06	Gomaringen	0	4.10645	3	0.25	0.196429	0.5	0.155172	2976.1	276983	0.0102789	1.48373	1.85863	0.0970857	1.08571	204.022	740	227.706	0	0
929	3.53376e+06	5.38517e+06	Dettingen unter Teck	0	6.65361	3	0.2	0.049296	0	0.107692	3096.1	2.05861e+06	0.00932867	1.37194	1.76895	0.12934	1.03196	687.405	393.224	393.224	0	0
930	3.55374e+06	5.39244e+06	Süßen	0	5.43411	3	0.166667	0.428571	0.333333	0.243243	573.4	29647.5	0.0222651	1.2209	1.69688	0.108562	1.57604	777.817	11.1803	11.1803	0	0
931	3.5325e+06	5.38548e+06	Dettingen unter Teck	0	6.09098	3	0.2	0.049296	0	0.107692	462.6	1.70997e+06	0.00989906	1.37194	1.76895	0.12934	1.03196	738.935	908.433	10	0	0
932	3.50458e+06	5.36633e+06	Nehren	0	22.3844	3	0	0	0	0	2748.8	309862	0.009615	1.69551	2.29424	0.103814	1.45652	241.868	234.787	168.077	0	0
933	3.54691e+06	5.39023e+06	Dürnau	0	2.86195	3	0.461538	0.545455	1	0.5	1799.9	6204.31	0.0764349	1.42809	2.06038	0.0877763	1.47761	244.387	730.924	15	0	0
934	3.52639e+06	5.38205e+06	Frickenhausen	0	5.66014	3	0.125	0.076923	0.5	0.054054	1677	1.34387e+06	0.00860131	1.19047	1.7225	0.103565	1.05882	697.585	1125.79	69.4622	0	0
935	3.50183e+06	5.36382e+06	Ofterdingen	0	12.5554	3	0.363636	0.076923	1	0.142857	322.7	63683.6	0.0262974	1.64931	2.09688	0.10547	0.946809	312.57	459.184	335.932	0	0
936	3.52096e+06	5.38248e+06	Bempflingen	1	3.93691	3	0.333333	0.363636	1	0.272727	136807	20969	0.0362233	1.26159	1.79849	0.0983425	1.38889	729.452	507.568	60.4152	0	0
937	3.51618e+06	5.37045e+06	Pfullingen	0	20.7726	4	0.363636	0.576923	0.285714	0.567568	745.6	898104	0.00809342	1.16265	1.70163	0.117938	1.10118	53.8516	220	35	0	0
938	3.5292e+06	5.3825e+06	Beuren	0	7.70483	3	0.076923	0.333333	0.333333	0.195652	644.1	333570	0.0172854	1.14684	1.5569	0.11726	1.02703	485.644	439.829	10	0	0
939	3.52699e+06	5.38194e+06	Frickenhausen	0	12.9386	4	0.125	0.076923	0.5	0.054054	2694.7	1.34387e+06	0.00860131	1.19047	1.7225	0.103565	1.05882	376.464	612.944	350	0	0
940	3.53213e+06	5.38529e+06	Owen	0	20.271	3	0.133333	0.47619	1	0.354167	3133.6	1.70997e+06	0.00989906	1.31243	1.74632	0.117756	1.05	1145.53	1225.77	207.966	0	0
941	3.50523e+06	5.36802e+06	Dußlingen	1	5.44589	0	0.2	0.128205	0	0.090909	4216.3	4517.92	0.0591323	1.22642	1.77338	0.102978	0.989209	5	678.841	0	0	0
942	3.50724e+06	5.36747e+06	Gomaringen	0	1.82352	3	0.25	0.196429	0.5	0.155172	692.7	276983	0.0102789	1.48373	1.85863	0.0970857	1.08571	148.661	700	179.234	0	0
943	3.53264e+06	5.39373e+06	Wernau (Neckar)	0	18.9733	3	0.285714	0.214286	0	0.384615	1363.1	41948.8	0.0275295	0.987809	1.53707	0.0834862	1.16606	890.688	701.231	280	0	0
944	3.54201e+06	5.38316e+06	Neidlingen	0	15.1748	3	0.2	0.157143	1	0.114286	1797.1	881477	0.0160684	1.31936	1.78261	0.10745	0.909091	405.123	547.951	39.0512	0	0
945	3.51751e+06	5.37389e+06	Reutlingen	0	5.6977	3	0.21978	0.19774	0.205882	0.215686	1617.7	851648	0.00670136	1.23563	1.5396	0.120979	1.29265	310.161	10	10	0	0
946	3.53455e+06	5.3904e+06	Kirchheim unter Teck	1	1.93258	0	0.181818	0.241379	0.181818	0.245098	773.8	185513	0.0135172	1.22208	1.69769	0.119627	1.30893	0	406.51	11.1803	0	0
947	3.52714e+06	5.37926e+06	Neuffen	0	3.88785	3	0.333333	0.326531	0.333333	0.222222	2538.7	674506	0.0153244	1.28788	1.79529	0.111786	1.13303	217.83	536.656	217.083	0	0
948	3.542e+06	5.39212e+06	Hattenhofen	0	2.01754	2	0.1	0.55	0	0.342105	1790.2	29545.1	0.0316165	1.84567	2.32571	0.107832	1.25893	63.6396	178.676	65.192	0	0
949	3.54182e+06	5.38364e+06	Neidlingen	0	12.169	3	0.2	0.157143	1	0.114286	197704	881477	0.0160684	1.31936	1.78261	0.10745	0.909091	416.203	714.213	149.164	0	0
950	3.53159e+06	5.3923e+06	Kirchheim unter Teck	0	4.71447	3	0.181818	0.241379	0.181818	0.245098	1285.4	37518.1	0.0263894	1.22208	1.69769	0.119627	1.30893	508.183	298.329	162.788	0	0
951	3.52475e+06	5.38183e+06	Frickenhausen	0	7.40287	3	0.125	0.076923	0.5	0.054054	2665.4	289170	0.0107283	1.19047	1.7225	0.103565	1.05882	197.231	45	45	0	0
952	3.54126e+06	5.38829e+06	Aichelberg	1	2.81118	0	1	0.4	0	0.538462	13029.1	1.26914e+06	0.00550867	1.88304	2.41667	0.107649	1.55556	388.909	145.602	69.6419	0	0
953	3.51764e+06	5.37439e+06	Reutlingen	0	18.7133	4	0.21978	0.19774	0.205882	0.215686	1565.8	851648	0.00670136	1.23563	1.5396	0.120979	1.29265	283.637	180.347	170.88	0	0
954	3.536e+06	5.38816e+06	Kirchheim unter Teck	1	8.98159	3	0.181818	0.241379	0.181818	0.245098	2014.6	260751	0.0226392	1.22208	1.69769	0.119627	1.30893	640.078	55	65	0	0
955	3.54845e+06	5.39542e+06	Göppingen	1	4.55387	3	0.245902	0.57377	0.315789	0.36875	48327	521299	0.0169237	1.02208	1.4472	0.138668	1.15129	63.6396	32.0156	35.3553	0	0
956	3.49895e+06	5.36385e+06	Bodelshausen	0	0	0	0.5	0.037037	0	0.25	0	112193	0.0128379	1.62158	2.06108	0.103155	1.18996	1216.55	1639.53	248.244	0	0
957	3.51714e+06	5.37423e+06	Reutlingen	0	7.09747	0	0.21978	0.19774	0.205882	0.215686	26387.4	851648	0.00670136	1.23563	1.5396	0.120979	1.29265	0	93.9415	5	0	0
958	3.52836e+06	5.3794e+06	Neuffen	1	3.84055	0	0.333333	0.326531	0.333333	0.222222	661.6	48257.7	0.0265136	1.28788	1.79529	0.111786	1.13303	0	130.384	5	0	0
959	3.54492e+06	5.39595e+06	Göppingen	1	6.55745	3	0.245902	0.57377	0.315789	0.36875	9211.5	32968.7	0.02744	1.02208	1.4472	0.138668	1.15129	484.381	232.594	15.8114	0	0
960	3.54915e+06	5.39464e+06	Göppingen	0	7.40192	3	0.245902	0.57377	0.315789	0.36875	3231.7	521299	0.0169237	1.02208	1.4472	0.138668	1.15129	360	227.706	30	0	0
961	3.52103e+06	5.38119e+06	Bempflingen	0	5.86305	3	0.333333	0.363636	1	0.272727	1655	257751	0.0186256	1.26159	1.79849	0.0983425	1.38889	125	203.531	134.629	0	0
962	3.53035e+06	5.38233e+06	Beuren	0	11.5697	4	0.076923	0.333333	0.333333	0.195652	2890.2	508268	0.0193484	1.14684	1.5569	0.11726	1.02703	599.083	467.36	94.8683	0	0
963	3.51322e+06	5.3723e+06	Reutlingen	0	3.40525	3	0.21978	0.19774	0.205882	0.215686	1168.2	597842	0.0117804	1.23563	1.5396	0.120979	1.29265	268.794	571.183	45	0	0
964	3.51482e+06	5.36963e+06	Pfullingen	0	16.5078	0	0.363636	0.576923	0.285714	0.567568	719.5	174635	0.0115238	1.16265	1.70163	0.117938	1.10118	767.919	1291.83	92.1954	0	0
965	3.53316e+06	5.39133e+06	Kirchheim unter Teck	1	1.15994	0	0.181818	0.241379	0.181818	0.245098	2248	124195	0.0141063	1.22208	1.69769	0.119627	1.30893	0	248.244	7.07107	0	0
966	3.53322e+06	5.38819e+06	Dettingen unter Teck	0	18.6527	3	0.2	0.049296	0	0.107692	2068.5	184116	0.0232693	1.37194	1.76895	0.12934	1.03196	44.7214	201.556	25.4951	0	0
967	3.53376e+06	5.38407e+06	Owen	0	11.4068	3	0.133333	0.47619	1	0.354167	544.8	2.05861e+06	0.00932867	1.31243	1.74632	0.117756	1.05	185.607	326.382	189.275	0	0
968	3.55664e+06	5.39054e+06	Gingen an der Fils	1	13.3404	3	0.25	0.588235	0	0.535714	1673.5	7373.06	0.0487661	1.1043	1.56275	0.127738	1.25	907.331	321.442	115.109	0	0
969	3.54088e+06	5.38298e+06	Neidlingen	0	16.714	3	0.2	0.157143	1	0.114286	14253.1	1.48249e+06	0.00924149	1.31936	1.78261	0.10745	0.909091	241.299	420.743	94.3398	0	0
970	3.52318e+06	5.37519e+06	Metzingen	0	7.42667	3	0.2	0.214953	0.428571	0.165138	599.5	23330.1	0.0449547	1.18686	1.56641	0.121267	1.33648	123.794	371.652	143.003	0	0
971	3.53632e+06	5.3882e+06	Kirchheim unter Teck	0	5.08006	3	0.181818	0.241379	0.181818	0.245098	5685.7	260751	0.0226392	1.22208	1.69769	0.119627	1.30893	485.309	112.805	120.416	0	0
972	3.52414e+06	5.38051e+06	Kohlberg	0	15.3396	3	0.25	0.076923	0	0.035714	250.6	270170	0.0168053	1.33489	1.88101	0.109253	1.40323	310.645	268.561	245.204	0	0
973	3.54082e+06	5.38477e+06	Weilheim an der Teck	0	10.2407	3	0.297297	0.193798	0.230769	0.204545	2422.2	416375	0.00954846	1.28113	1.82018	0.108577	1.03917	995.301	260	61.0328	0	0
974	3.53897e+06	5.39419e+06	Schlierbach	0	4.06364	3	0	0.333333	0	0.166667	2067.4	121258	0.0258702	1.39391	2.01306	0.0852391	1.14667	652.419	39.0512	39.0512	0	0
975	3.53452e+06	5.38991e+06	Kirchheim unter Teck	0	18.8923	3	0.181818	0.241379	0.181818	0.245098	2003.3	394274	0.0145663	1.22208	1.69769	0.119627	1.30893	120.416	181.728	69.4622	0	0
976	3.51884e+06	5.37054e+06	Eningen unter Achalm	0	9.5775	3	0.388889	0.6	0.4	0.392857	30765	310933	0.0115632	1.29455	1.67437	0.110704	1.02949	285.175	743.135	88.6002	0	0
977	3.50461e+06	5.36421e+06	Mössingen	0	2.54025	3	0.304348	0.11465	0	0.151316	769.8	1.29779e+06	0.0060432	1.60177	2.13591	0.0976952	1.05316	108.167	290.172	131.244	0	0
978	3.54684e+06	5.39337e+06	Heiningen	1	5.21961	3	0.185185	0.526316	1	0.348837	10326.9	103615	0.0409819	1.53551	2.04153	0.103488	1.07647	601.207	447.465	10	0	0
979	3.51146e+06	5.3707e+06	Reutlingen	0	6.80087	2	0.21978	0.19774	0.205882	0.215686	1170.2	5714.31	0.0588563	1.23563	1.5396	0.120979	1.29265	49.2443	746.207	74.3303	0	0
980	3.54151e+06	5.39588e+06	Albershausen	0	6.37864	3	0.214286	0.6	1	0.375	1258.9	27804.8	0.0402311	1.36751	1.81129	0.104651	1.18939	90	86.3134	86.3134	0	0
981	3.51701e+06	5.37752e+06	Reutlingen	1	17.5295	3	0.21978	0.19774	0.205882	0.215686	704.4	59835.2	0.0260572	1.23563	1.5396	0.120979	1.29265	296.057	213.6	166.208	0	0
982	3.50682e+06	5.37146e+06	Kusterdingen	0	1.69977	0	0.259259	0.168675	1	0.153226	0	141558	0.0186832	1.39645	1.80254	0.10766	1.5061	515.388	730	250	0	0
983	3.52831e+06	5.37932e+06	Neuffen	1	11.3193	0	0.333333	0.326531	0.333333	0.222222	553.8	48257.7	0.0265136	1.28788	1.79529	0.111786	1.13303	0	36.0555	7.07107	0	0
984	3.51161e+06	5.37581e+06	Wannweil	0	7.19122	0	0.5	0.2	0.2	0.166667	1043.3	64362.5	0.0364764	1.10228	1.56674	0.126792	1.42478	101.98	25	25	0	0
985	3.50301e+06	5.3612e+06	Mössingen	0	3.02576	3	0.304348	0.11465	0	0.151316	3023	18157.8	0.0486068	1.60177	2.13591	0.0976952	1.05316	491.172	843.282	21.2132	0	0
986	3.52221e+06	5.37449e+06	Metzingen	0	6.67839	3	0.2	0.214953	0.428571	0.165138	2808.2	586556	0.010557	1.18686	1.56641	0.121267	1.33648	451.774	111.803	90.1388	0	0
987	3.52422e+06	5.38144e+06	Frickenhausen	0	17.7657	3	0.125	0.076923	0.5	0.054054	895.7	289170	0.0107283	1.19047	1.7225	0.103565	1.05882	316.228	125.3	58.5235	0	0
988	3.51566e+06	5.36729e+06	Pfullingen	0	7.08707	3	0.363636	0.576923	0.285714	0.567568	3563.6	520492	0.0100736	1.16265	1.70163	0.117938	1.10118	457.083	179.513	101.98	0	0
989	3.54151e+06	5.39208e+06	Hattenhofen	0	5.2777	2	0.1	0.55	0	0.342105	1621.7	186622	0.0201534	1.84567	2.32571	0.107832	1.25893	20	120.104	60.208	0	0
990	3.53445e+06	5.39007e+06	Kirchheim unter Teck	0	11.8143	3	0.181818	0.241379	0.181818	0.245098	1368	394274	0.0145663	1.22208	1.69769	0.119627	1.30893	74.3303	163.478	78.2624	0	0
991	3.518e+06	5.37033e+06	Pfullingen	0	13.3197	3	0.363636	0.576923	0.285714	0.567568	932.5	161588	0.0147898	1.16265	1.70163	0.117938	1.10118	357.771	798.827	76.1577	0	0
992	3.54487e+06	5.39604e+06	Göppingen	1	11.1958	3	0.245902	0.57377	0.315789	0.36875	1621.4	32968.7	0.02744	1.02208	1.4472	0.138668	1.15129	425	335.41	76.4853	0	0
993	3.52582e+06	5.38369e+06	Frickenhausen	0	3.5844	3	0.125	0.076923	0.5	0.054054	1020.4	11206.5	0.037643	1.19047	1.7225	0.103565	1.05882	51.4781	47.1699	47.1699	0	0
994	3.52073e+06	5.37896e+06	Metzingen	0	15.9476	3	0.2	0.214953	0.428571	0.165138	886	139839	0.0121983	1.18686	1.56641	0.121267	1.33648	88.459	550.273	70.1783	0	0
995	3.51705e+06	5.37762e+06	Reutlingen	0	1.52553	3	0.21978	0.19774	0.205882	0.215686	1876.2	59835.2	0.0260572	1.23563	1.5396	0.120979	1.29265	196.023	225.942	225.942	0	0
996	3.50945e+06	5.37175e+06	Kusterdingen	0	18.4092	3	0.259259	0.168675	1	0.153226	75994	774234	0.0129779	1.39645	1.80254	0.10766	1.5061	641.132	813.173	291.548	0	0
997	3.51042e+06	5.36598e+06	Reutlingen	0	4.92235	3	0.21978	0.19774	0.205882	0.215686	1545.8	483983	0.0103605	1.23563	1.5396	0.120979	1.29265	226.108	554.707	11.1803	0	0
998	3.53903e+06	5.38497e+06	Weilheim an der Teck	0	8.04233	4	0.297297	0.193798	0.230769	0.204545	1953	1.55086e+06	0.00669018	1.28113	1.82018	0.108577	1.03917	902.344	1366.11	148.661	1	0
999	3.557e+06	5.39154e+06	Gingen an der Fils	0	4.83068	3	0.25	0.588235	0	0.535714	3486.1	544352	0.0179697	1.1043	1.56275	0.127738	1.25	189.275	241.35	201.556	0	0
1000	3.51467e+06	5.36954e+06	Pfullingen	0	13.4571	0	0.363636	0.576923	0.285714	0.567568	1270.7	174635	0.0115238	1.16265	1.70163	0.117938	1.10118	855.365	1224.83	61.0328	0	0
1001	3.51554e+06	5.36767e+06	Pfullingen	0	5.13562	0	0.363636	0.576923	0.285714	0.567568	18390.9	520492	0.0100736	1.16265	1.70163	0.117938	1.10118	345.326	145.344	145.344	0	0
1002	3.52709e+06	5.38483e+06	Frickenhausen	0	4.69239	3	0.125	0.076923	0.5	0.054054	2820.9	1.08813e+06	0.00929233	1.19047	1.7225	0.103565	1.05882	60.4152	884.081	192.354	0	0
1003	3.55919e+06	5.39025e+06	Kuchen	0	10.2605	3	0.333333	1	0	0.6	5531.2	482787	0.0230543	1.02878	1.52941	0.11358	1.13072	264.008	978.736	73.8241	0	0
1004	3.53924e+06	5.3854e+06	Weilheim an der Teck	0	12.2598	0	0.297297	0.193798	0.230769	0.204545	646.1	1.55086e+06	0.00669018	1.28113	1.82018	0.108577	1.03917	543.369	950.276	136.015	1	0
1005	3.52649e+06	5.38167e+06	Neuffen	0	4.7047	3	0.333333	0.326531	0.333333	0.222222	495.6	1.34387e+06	0.00860131	1.28788	1.79529	0.111786	1.13303	876.427	1158.12	115.974	0	0
1006	3.51856e+06	5.37246e+06	Eningen unter Achalm	0	7.06528	3	0.388889	0.6	0.4	0.392857	6094	783326	0.0104196	1.29455	1.67437	0.110704	1.02949	169.853	751.532	44.7214	0	0
1007	3.52119e+06	5.3838e+06	Altdorf	1	5.62089	3	0.6	0.04	0	0.142857	949.3	55039.4	0.0287892	2.09142	2.66667	0.0938375	1.67647	762.053	698.176	258.94	0	0
1008	3.53293e+06	5.38555e+06	Dettingen unter Teck	0	13.007	4	0.2	0.049296	0	0.107692	1879.3	1.70997e+06	0.00989906	1.37194	1.76895	0.12934	1.03196	415.03	494.217	38.0789	0	0
1009	3.51757e+06	5.38189e+06	Reutlingen	0	7.97325	3	0.21978	0.19774	0.205882	0.215686	137610	44754.8	0.0224271	1.23563	1.5396	0.120979	1.29265	778.332	834.161	30.4138	0	0
1010	3.52448e+06	5.38178e+06	Frickenhausen	0	6.90762	3	0.125	0.076923	0.5	0.054054	776.7	289170	0.0107283	1.19047	1.7225	0.103565	1.05882	195.576	215.87	7.07107	0	0
1011	3.54873e+06	5.39246e+06	Heiningen	0	3.04249	3	0.185185	0.526316	1	0.348837	3519.5	6013.17	0.0529837	1.53551	2.04153	0.103488	1.07647	513.931	642.573	38.0789	0	0
1012	3.50785e+06	5.36905e+06	Gomaringen	0	5.47611	3	0.25	0.196429	0.5	0.155172	1459.7	146664	0.0146182	1.48373	1.85863	0.0970857	1.08571	71.5891	219.146	70.7107	0	0
1013	3.50302e+06	5.36157e+06	Mössingen	0	2.7484	0	0.304348	0.11465	0	0.151316	2282.9	47976.4	0.0347828	1.60177	2.13591	0.0976952	1.05316	154.353	509.362	31.6228	0	0
1014	3.51887e+06	5.37051e+06	Eningen unter Achalm	0	8.53347	3	0.388889	0.6	0.4	0.392857	1763.7	310933	0.0115632	1.29455	1.67437	0.110704	1.02949	310.04	779.631	60	0	0
1015	3.5527e+06	5.39072e+06	Schlat	1	0.916037	0	0.5	0.363636	0	0.361111	757.8	10806.5	0.0504572	1.21365	1.90775	0.123203	1.17333	0	548.11	15	0	0
1016	3.54346e+06	5.38955e+06	Boll	0	9.10458	3	0.285714	2.5	1	0.538462	3040.4	2642.54	0.109328	1.35042	1.91502	0.160651	1.21591	517.228	58.3095	58.3095	0	0
1017	3.52224e+06	5.37523e+06	Metzingen	0	6.07647	3	0.2	0.214953	0.428571	0.165138	1306	227715	0.019749	1.18686	1.56641	0.121267	1.33648	476.707	531.601	30	0	0
1018	3.52506e+06	5.38051e+06	Kohlberg	0	13.6527	3	0.25	0.076923	0	0.035714	1524	1.20814e+06	0.013945	1.33489	1.88101	0.109253	1.40323	140.089	300.042	173.925	0	0
1019	3.5328e+06	5.38703e+06	Dettingen unter Teck	0	6.06267	3	0.2	0.049296	0	0.107692	1716.6	106446	0.0139293	1.37194	1.76895	0.12934	1.03196	105	835.733	95	0	0
1020	3.52454e+06	5.38239e+06	Frickenhausen	0	19.9444	3	0.125	0.076923	0.5	0.054054	820.1	83452.3	0.0199876	1.19047	1.7225	0.103565	1.05882	10	129.035	11.1803	0	0
1021	3.53537e+06	5.3911e+06	Kirchheim unter Teck	0	5.18617	3	0.181818	0.241379	0.181818	0.245098	3069.4	96536.3	0.0231511	1.22208	1.69769	0.119627	1.30893	422.522	219.317	40.3113	0	0
1022	3.52619e+06	5.37961e+06	Neuffen	0	3.232	3	0.333333	0.326531	0.333333	0.222222	1303.7	674506	0.0153244	1.28788	1.79529	0.111786	1.13303	646.007	424.264	81.3941	0	0
1023	3.53905e+06	5.39731e+06	Ebersbach an der Fils	1	12.2378	3	0.288136	0.571429	0	0.370787	1393.8	59622.9	0.0387015	1.1282	1.82888	0.0992791	1.14139	183.371	90	90	0	0
1024	3.54081e+06	5.3856e+06	Weilheim an der Teck	0	5.60852	3	0.297297	0.193798	0.230769	0.204545	1456.2	416375	0.00954846	1.28113	1.82018	0.108577	1.03917	579.871	312.13	221.02	0	0
1025	3.52803e+06	5.38259e+06	Frickenhausen	0	15.9106	3	0.125	0.076923	0.5	0.054054	535.2	239770	0.01344	1.19047	1.7225	0.103565	1.05882	105	150.083	150.083	0	0
1026	3.53533e+06	5.38871e+06	Kirchheim unter Teck	1	2.74146	3	0.181818	0.241379	0.181818	0.245098	3566	260751	0.0226392	1.22208	1.69769	0.119627	1.30893	176.918	568.727	246.018	0	0
1027	3.53499e+06	5.39012e+06	Kirchheim unter Teck	1	5.40597	0	0.181818	0.241379	0.181818	0.245098	504.4	185513	0.0135172	1.22208	1.69769	0.119627	1.30893	0	635	20.6155	0	0
1028	3.52653e+06	5.38116e+06	Neuffen	0	6.04601	3	0.333333	0.326531	0.333333	0.222222	1415.9	1.20814e+06	0.013945	1.28788	1.79529	0.111786	1.13303	733.553	1149.83	44.7214	0	0
1029	3.52463e+06	5.37639e+06	Dettingen an der Erms	0	7.5327	3	0.230769	0.166667	1	0.159091	1632.7	1.10291e+06	0.0123476	1.25849	1.75538	0.113123	1.88725	350.321	220.057	134.536	0	0
1030	3.51518e+06	5.37836e+06	Reutlingen	1	6.91441	2	0.21978	0.19774	0.205882	0.215686	929.6	8090.78	0.050803	1.23563	1.5396	0.120979	1.29265	148.661	80	80	0	0
1031	3.53262e+06	5.38307e+06	Owen	0	5.23452	3	0.133333	0.47619	1	0.354167	528.5	1.39443e+06	0.0107842	1.31243	1.74632	0.117756	1.05	271.662	40.3113	40.3113	0	0
1032	3.52152e+06	5.37617e+06	Metzingen	0	20.2733	3	0.2	0.214953	0.428571	0.165138	608.3	505116	0.00726691	1.18686	1.56641	0.121267	1.33648	972.33	725	76.1577	0	0
1033	3.52734e+06	5.3841e+06	Frickenhausen	0	3.49646	3	0.125	0.076923	0.5	0.054054	1516.1	1.08813e+06	0.00929233	1.19047	1.7225	0.103565	1.05882	148.661	599.416	50	0	0
1034	3.52507e+06	5.37837e+06	Dettingen an der Erms	0	15.9185	3	0.230769	0.166667	1	0.159091	1007	2.35355e+06	0.00791344	1.25849	1.75538	0.113123	1.88725	582.28	582.795	582.795	0	0
1035	3.51053e+06	5.36616e+06	Reutlingen	0	5.28667	3	0.21978	0.19774	0.205882	0.215686	2668.6	483983	0.0103605	1.23563	1.5396	0.120979	1.29265	14.1421	335.41	35.3553	0	0
1036	3.55659e+06	5.39318e+06	Süßen	1	0.219053	3	0.166667	0.428571	0.333333	0.243243	3469.2	243599	0.019395	1.2209	1.69688	0.108562	1.57604	26.9258	393.224	91.9239	0	0
1037	3.55964e+06	5.3883e+06	Geislingen an der Steige	0	8.78783	3	0.252174	0.616667	0.25	0.360248	1381.4	1.18824e+06	0.0115027	0.886321	1.27693	0.136996	1.04238	35	143.178	58.3095	0	0
1038	3.53534e+06	5.39108e+06	Kirchheim unter Teck	1	6.38565	3	0.181818	0.241379	0.181818	0.245098	1490.2	96536.3	0.0231511	1.22208	1.69769	0.119627	1.30893	387.331	219.203	25.4951	0	0
1039	3.5129e+06	5.37257e+06	Reutlingen	0	4.99089	3	0.21978	0.19774	0.205882	0.215686	1685.7	168563	0.0189381	1.23563	1.5396	0.120979	1.29265	306.472	265.047	35.3553	0	0
1040	3.53994e+06	5.38432e+06	Weilheim an der Teck	0	7.96928	3	0.297297	0.193798	0.230769	0.204545	4563.3	437760	0.0135106	1.28113	1.82018	0.108577	1.03917	551.838	548.11	26.9258	0	0
1041	3.50937e+06	5.36909e+06	Gomaringen	0	9.29093	3	0.25	0.196429	0.5	0.155172	813.5	359254	0.0105774	1.48373	1.85863	0.0970857	1.08571	955.052	705.638	170	0	0
1042	3.52159e+06	5.37619e+06	Metzingen	0	16.2886	3	0.2	0.214953	0.428571	0.165138	817.3	505116	0.00726691	1.18686	1.56641	0.121267	1.33648	898.137	676.757	83.2166	0	0
1043	3.51663e+06	5.38139e+06	Neckartenzlingen	0	0	0	0	0.1	1	0.266667	0	27359.6	0.0279177	1.30354	1.90761	0.0887945	1.23404	567.737	665.676	566.083	0	0
1044	3.52695e+06	5.38784e+06	Nürtingen	0	10.5655	3	0.2	0.22314	0.315789	0.226277	3316.3	65129.5	0.016697	1.36016	1.73962	0.12287	1.1157	57.0088	53.8516	53.8516	0	0
1045	3.5409e+06	5.38304e+06	Neidlingen	0	13.9951	3	0.2	0.157143	1	0.114286	1195.1	1.48249e+06	0.00924149	1.31936	1.78261	0.10745	0.909091	195	364.314	33.541	0	0
1046	3.54931e+06	5.38937e+06	Heiningen	1	12.7842	3	0.185185	0.526316	1	0.348837	4481.6	111894	0.0296579	1.53551	2.04153	0.103488	1.07647	859.142	990.581	130.384	0	0
1047	3.51856e+06	5.3819e+06	Neckartenzlingen	0	15.4636	3	0	0.1	1	0.266667	3739.1	269162	0.020936	1.30354	1.90761	0.0887945	1.23404	329.28	325.346	322.064	0	0
1048	3.50299e+06	5.36088e+06	Mössingen	0	6.4312	3	0.304348	0.11465	0	0.151316	685.8	186364	0.0204816	1.60177	2.13591	0.0976952	1.05316	800.391	1134.16	68.0074	0	1
1049	3.53866e+06	5.38556e+06	Weilheim an der Teck	0	1.54736	3	0.297297	0.193798	0.230769	0.204545	2279.7	1.55086e+06	0.00669018	1.28113	1.82018	0.108577	1.03917	438.406	785	14.1421	0	0
1050	3.55039e+06	5.39046e+06	Eschenbach	0	8.93992	3	0.142857	0.583333	0	0.375	181347	54040.8	0.0211785	2.23722	2.98246	0.110795	1.37879	646.22	1167.02	85	0	0
1051	3.54155e+06	5.38679e+06	Weilheim an der Teck	0	10.2631	5	0.297297	0.193798	0.230769	0.204545	117377	35373	0.0300813	1.28113	1.82018	0.108577	1.03917	798.812	1084.45	257.391	0	0
1052	3.50434e+06	5.36209e+06	Mössingen	0	7.59172	3	0.304348	0.11465	0	0.151316	657.1	1.71355e+06	0.0133141	1.60177	2.13591	0.0976952	1.05316	242.745	997.121	55.2268	0	0
1053	3.54838e+06	5.39537e+06	Göppingen	0	18.0687	4	0.245902	0.57377	0.315789	0.36875	8327.5	521299	0.0169237	1.02208	1.4472	0.138668	1.15129	144.222	113.137	116.726	0	0
1054	3.54171e+06	5.38218e+06	Neidlingen	0	10.9016	3	0.2	0.157143	1	0.114286	898.2	1.48249e+06	0.00924149	1.31936	1.78261	0.10745	0.909091	31.6228	273.907	70	0	0
1055	3.5485e+06	5.39414e+06	Heiningen	0	3.25504	3	0.185185	0.526316	1	0.348837	5026.3	19324.6	0.0444979	1.53551	2.04153	0.103488	1.07647	812.711	433.503	364.005	0	0
1056	3.51984e+06	5.38415e+06	Altdorf	0	3.50492	2	0.6	0.04	0	0.142857	4244.9	140615	0.0155097	2.09142	2.66667	0.0938375	1.67647	65.192	120.83	120.83	0	0
1057	3.50216e+06	5.36587e+06	Ofterdingen	0	4.20666	3	0.363636	0.076923	1	0.142857	1627.6	908719	0.0134922	1.64931	2.09688	0.10547	0.946809	433.244	1085.09	156.605	0	0
1058	3.52241e+06	5.37787e+06	Metzingen	1	7.5611	0	0.2	0.214953	0.428571	0.165138	1512.4	16516.4	0.0329563	1.18686	1.56641	0.121267	1.33648	0	586.195	25	0	0
1059	3.54979e+06	5.39209e+06	Heiningen	1	2.66843	3	0.185185	0.526316	1	0.348837	97031	103814	0.0160486	1.53551	2.04153	0.103488	1.07647	161.012	156.525	156.525	0	0
1060	3.5455e+06	5.39461e+06	Göppingen	0	1.91446	3	0.245902	0.57377	0.315789	0.36875	5000.2	3831	0.101138	1.02208	1.4472	0.138668	1.15129	476.707	755.811	156.605	0	0
1061	3.53471e+06	5.39115e+06	Kirchheim unter Teck	0	18.1959	3	0.181818	0.241379	0.181818	0.245098	2977.1	285161	0.00989804	1.22208	1.69769	0.119627	1.30893	232.433	100.623	65.192	0	0
1062	3.53237e+06	5.38885e+06	Kirchheim unter Teck	1	2.53522	3	0.181818	0.241379	0.181818	0.245098	4879.9	8838.94	0.0451626	1.22208	1.69769	0.119627	1.30893	397.146	64.0312	72.111	0	0
1063	3.5327e+06	5.38767e+06	Dettingen unter Teck	0	4.46635	3	0.2	0.049296	0	0.107692	2676.7	2592.8	0.0941057	1.37194	1.76895	0.12934	1.03196	524.047	878.82	184.391	0	0
1064	3.55462e+06	5.39202e+06	Süßen	1	4.77114	0	0.166667	0.428571	0.333333	0.243243	3354.4	94317.4	0.0343796	1.2209	1.69688	0.108562	1.57604	972.69	358.504	358.504	0	0
1065	3.51722e+06	5.36866e+06	Pfullingen	0	2.75456	3	0.363636	0.576923	0.285714	0.567568	20674.5	1.02441e+06	0.00879794	1.16265	1.70163	0.117938	1.10118	85	128.062	128.062	1	0
1066	3.52311e+06	5.38382e+06	Großbettlingen	1	9.86298	0	0.333333	0.222222	0	0.25	791.3	119422	0.0161846	1.73035	2.47265	0.0858525	1.60976	0	85.5862	20	0	0
1067	3.52963e+06	5.39291e+06	Wendlingen am Neckar	0	2.71243	2	0.357143	0.071429	0.333333	0.375	2463.4	4052.39	0.068608	1.17744	1.7408	0.0861055	1.28011	382.426	749.083	15	0	0
1068	3.54062e+06	5.39039e+06	Ohmden	1	9.30482	3	0.5	0.103448	0	0.148148	1654.1	6856.78	0.0484614	1.41308	2.06513	0.102155	1.23529	876.926	173.566	173.566	0	0
1069	3.53396e+06	5.38396e+06	Owen	0	17.0599	0	0.133333	0.47619	1	0.354167	309.4	2.05861e+06	0.00932867	1.31243	1.74632	0.117756	1.05	244.233	154.353	154.353	0	0
1070	3.53997e+06	5.38416e+06	Weilheim an der Teck	0	9.63113	3	0.297297	0.193798	0.230769	0.204545	2424	437760	0.0135106	1.28113	1.82018	0.108577	1.03917	397.146	399.406	25	0	0
1071	3.54234e+06	5.39243e+06	Hattenhofen	1	3.36309	2	0.1	0.55	0	0.342105	5255.5	13944	0.0410845	1.84567	2.32571	0.107832	1.25893	0	135	85	0	0
1072	3.51083e+06	5.37444e+06	Wannweil	0	12.8575	3	0.5	0.2	0.2	0.166667	797.2	359132	0.0117938	1.10228	1.56674	0.126792	1.42478	446.01	873.169	64.0312	0	0
1073	3.50859e+06	5.36819e+06	Gomaringen	0	6.09543	2	0.25	0.196429	0.5	0.155172	1170.7	154578	0.0124705	1.48373	1.85863	0.0970857	1.08571	448.693	341.76	227.706	0	0
1074	3.55081e+06	5.39307e+06	Göppingen	0	0.9625	2	0.245902	0.57377	0.315789	0.36875	2884.4	3258.16	0.098128	1.02208	1.4472	0.138668	1.15129	65	49.2443	49.2443	0	0
1075	3.53231e+06	5.39143e+06	Kirchheim unter Teck	0	12.5005	4	0.181818	0.241379	0.181818	0.245098	1155.1	304064	0.0173842	1.22208	1.69769	0.119627	1.30893	254.951	154.029	154.029	0	0
1076	3.53856e+06	5.3897e+06	Ohmden	1	7.76998	0	0.5	0.103448	0	0.148148	854.3	464865	0.0102856	1.41308	2.06513	0.102155	1.23529	0	175.57	15	0	0
1077	3.52638e+06	5.38219e+06	Frickenhausen	0	5.93525	3	0.125	0.076923	0.5	0.054054	738.2	1.34387e+06	0.00860131	1.19047	1.7225	0.103565	1.05882	638.161	1040.62	42.72	0	0
1078	3.52382e+06	5.37788e+06	Metzingen	0	8.5911	3	0.2	0.214953	0.428571	0.165138	739.3	2.35355e+06	0.00791344	1.18686	1.56641	0.121267	1.33648	645.368	736.818	55	0	0
1079	3.51519e+06	5.36909e+06	Pfullingen	0	3.31761	3	0.363636	0.576923	0.285714	0.567568	1565.2	16857.1	0.0384371	1.16265	1.70163	0.117938	1.10118	356.406	641.405	20.6155	0	0
1080	3.53561e+06	5.38538e+06	Bissingen an der Teck	1	3.90975	0	0.333333	0.212766	0.5	0.254237	1902.4	1.06197e+06	0.0117425	1.35031	1.68719	0.114481	0.989418	395	547.22	155	0	0
1081	3.53912e+06	5.38608e+06	Weilheim an der Teck	1	2.10404	0	0.297297	0.193798	0.230769	0.204545	3337.6	1.55086e+06	0.00669018	1.28113	1.82018	0.108577	1.03917	0	266.693	5	0	0
1082	3.55266e+06	5.39076e+06	Schlat	1	3.8507	0	0.5	0.363636	0	0.361111	713.5	10806.5	0.0504572	1.21365	1.90775	0.123203	1.17333	0	496.488	25	0	0
1083	3.51754e+06	5.3816e+06	Reutlingen	1	8.2288	3	0.21978	0.19774	0.205882	0.215686	3124.7	127514	0.0122766	1.23563	1.5396	0.120979	1.29265	496.488	566.789	132.853	0	0
1084	3.52528e+06	5.37963e+06	Kohlberg	0	12.1243	0	0.25	0.076923	0	0.035714	0	308893	0.0165857	1.33489	1.88101	0.109253	1.40323	191.377	554.91	200.125	0	0
1085	3.53556e+06	5.38471e+06	Bissingen an der Teck	0	14.0075	3	0.333333	0.212766	0.5	0.254237	1767.1	1.06197e+06	0.0117425	1.35031	1.68719	0.114481	0.989418	426.878	764.477	171.026	0	1
1086	3.52053e+06	5.36989e+06	Eningen unter Achalm	1	9.1136	3	0.388889	0.6	0.4	0.392857	313967	69859.4	0.0215997	1.29455	1.67437	0.110704	1.02949	1396.07	2283.56	335.336	0	0
1087	3.53428e+06	5.38201e+06	Lenningen	0	8.12059	3	0.277778	0.221311	0	0.288288	1451.9	1.54264e+06	0.0133674	1.09145	1.55231	0.106074	0.965142	214.767	519.086	210.238	0	0
1088	3.53941e+06	5.3861e+06	Weilheim an der Teck	0	6.74416	3	0.297297	0.193798	0.230769	0.204545	1480.1	1.55086e+06	0.00669018	1.28113	1.82018	0.108577	1.03917	75.6637	296.015	104.043	1	0
1089	3.55684e+06	5.39153e+06	Gingen an der Fils	0	6.28897	3	0.25	0.588235	0	0.535714	2289.3	544352	0.0179697	1.1043	1.56275	0.127738	1.25	339.779	368.307	356.546	0	0
1090	3.52722e+06	5.38454e+06	Frickenhausen	0	10.5555	3	0.125	0.076923	0.5	0.054054	25104	1.08813e+06	0.00929233	1.19047	1.7225	0.103565	1.05882	125	753.077	97.0824	0	0
1091	3.50857e+06	5.36902e+06	Gomaringen	0	12.6191	3	0.25	0.196429	0.5	0.155172	1023.2	359254	0.0105774	1.48373	1.85863	0.0970857	1.08571	160.702	474.473	115.434	0	0
1092	3.51762e+06	5.38146e+06	Reutlingen	0	7.49274	3	0.21978	0.19774	0.205882	0.215686	1695	127514	0.0122766	1.23563	1.5396	0.120979	1.29265	431.393	412.311	187.417	0	0
1093	3.54247e+06	5.39173e+06	Hattenhofen	1	2.50183	0	0.1	0.55	0	0.342105	682	14405.8	0.0468423	1.84567	2.32571	0.107832	1.25893	0	218.689	7.07107	0	0
1094	3.51555e+06	5.36793e+06	Pfullingen	0	7.51333	3	0.363636	0.576923	0.285714	0.567568	1235.7	520492	0.0100736	1.16265	1.70163	0.117938	1.10118	401.155	90	90	0	0
1095	3.53502e+06	5.39602e+06	Hochdorf	1	16.3763	0	0.052632	0.307692	1	0.129032	38536.2	539415	0.0175797	1.34266	2.08222	0.0941176	1.33333	299.666	685.292	5	0	0
1096	3.53964e+06	5.38493e+06	Weilheim an der Teck	0	9.4137	3	0.297297	0.193798	0.230769	0.204545	1353.7	1.55086e+06	0.00669018	1.28113	1.82018	0.108577	1.03917	1004.42	769.756	145.344	1	0
1097	3.50126e+06	5.3658e+06	Ofterdingen	0	3.74184	0	0.363636	0.076923	1	0.142857	0	908719	0.0134922	1.64931	2.09688	0.10547	0.946809	776.547	1150.32	111.803	0	0
1098	3.54528e+06	5.39148e+06	Göppingen	0	5.15992	3	0.245902	0.57377	0.315789	0.36875	1806.2	71265.4	0.0438775	1.02208	1.4472	0.138668	1.15129	395.285	50	50	0	0
1099	3.50655e+06	5.36894e+06	Gomaringen	0	10.7312	3	0.25	0.196429	0.5	0.155172	1846.9	54592.9	0.0496085	1.48373	1.85863	0.0970857	1.08571	53.8516	510.221	50	0	0
1100	3.53187e+06	5.39202e+06	Kirchheim unter Teck	1	6.67337	3	0.181818	0.241379	0.181818	0.245098	145762	176278	0.0145955	1.22208	1.69769	0.119627	1.30893	472.705	49.2443	49.2443	0	0
1101	3.53426e+06	5.37946e+06	Lenningen	0	16.4596	0	0.277778	0.221311	0	0.288288	0	296509	0.0134553	1.09145	1.55231	0.106074	0.965142	360.347	592.22	592.22	0	0
1102	3.5233e+06	5.37501e+06	Metzingen	0	13.2229	3	0.2	0.214953	0.428571	0.165138	1159.4	108746	0.0177851	1.18686	1.56641	0.121267	1.33648	207.183	404.753	10	0	0
1103	3.51109e+06	5.36728e+06	Reutlingen	1	6.73958	3	0.21978	0.19774	0.205882	0.215686	1303.7	408466	0.0191366	1.23563	1.5396	0.120979	1.29265	131.244	60.208	60.208	0	0
1104	3.52466e+06	5.37769e+06	Dettingen an der Erms	0	8.20974	0	0.230769	0.166667	1	0.159091	7673.8	2.35355e+06	0.00791344	1.25849	1.75538	0.113123	1.88725	271.155	0	0	0	0
1105	3.53378e+06	5.38351e+06	Owen	0	9.80029	2	0.133333	0.47619	1	0.354167	1092.7	2.05861e+06	0.00932867	1.31243	1.74632	0.117756	1.05	50	47.1699	47.1699	0	0
1106	3.54115e+06	5.38638e+06	Weilheim an der Teck	1	8.46149	3	0.297297	0.193798	0.230769	0.204545	1048.9	421013	0.0168905	1.28113	1.82018	0.108577	1.03917	362.802	523.259	85	0	0
1107	3.52453e+06	5.38543e+06	Nürtingen	0	10.4205	3	0.2	0.22314	0.315789	0.226277	1035.8	95217.7	0.0313343	1.36016	1.73962	0.12287	1.1157	332.453	649.384	44.7214	0	0
1108	3.55804e+06	5.38962e+06	Kuchen	1	10.0353	3	0.333333	1	0	0.6	11514.3	1.18824e+06	0.0115027	1.02878	1.52941	0.11358	1.13072	313.847	283.24	93.9415	0	0
1109	3.54126e+06	5.38182e+06	Neidlingen	0	12.1232	0	0.2	0.157143	1	0.114286	10278.8	122806	0.0188951	1.31936	1.78261	0.10745	0.909091	495.025	804.487	7.07107	1	0
1110	3.53299e+06	5.38701e+06	Dettingen unter Teck	1	13.164	3	0.2	0.049296	0	0.107692	2435.2	106446	0.0139293	1.37194	1.76895	0.12934	1.03196	33.541	650.308	40.3113	0	0
1111	3.53009e+06	5.39111e+06	Kirchheim unter Teck	1	3.2826	3	0.181818	0.241379	0.181818	0.245098	8027.4	66437.9	0.0278379	1.22208	1.69769	0.119627	1.30893	305.287	570.197	117.154	0	0
1112	3.53866e+06	5.39022e+06	Ohmden	0	1.50524	3	0.5	0.103448	0	0.148148	884.8	584209	0.0130428	1.41308	2.06513	0.102155	1.23529	149.833	331.361	0	0	0
1113	3.54375e+06	5.38812e+06	Boll	0	13.1738	3	0.285714	2.5	1	0.538462	2599	111335	0.0227611	1.35042	1.91502	0.160651	1.21591	171.026	916.747	206.155	1	0
1114	3.52419e+06	5.38043e+06	Kohlberg	0	16.6668	3	0.25	0.076923	0	0.035714	579.2	270170	0.0168053	1.33489	1.88101	0.109253	1.40323	266.693	227.431	227.431	0	0
1115	3.52496e+06	5.37626e+06	Dettingen an der Erms	0	8.80613	3	0.230769	0.166667	1	0.159091	1180.9	1.10291e+06	0.0123476	1.25849	1.75538	0.113123	1.88725	442.832	292.318	187.417	0	0
1116	3.549e+06	5.39458e+06	Göppingen	0	11.7252	3	0.245902	0.57377	0.315789	0.36875	3164.9	521299	0.0169237	1.02208	1.4472	0.138668	1.15129	502.021	295.846	100	0	0
1117	3.51533e+06	5.36831e+06	Pfullingen	0	5.57948	3	0.363636	0.576923	0.285714	0.567568	1172.9	7757.61	0.0725589	1.16265	1.70163	0.117938	1.10118	131.244	105.948	105.948	0	0
1118	3.51153e+06	5.37592e+06	Wannweil	0	12.5534	3	0.5	0.2	0.2	0.166667	1576	64362.5	0.0364764	1.10228	1.56674	0.126792	1.42478	217.083	154.434	154.434	0	0
1119	3.54252e+06	5.38885e+06	Aichelberg	0	8.43651	3	1	0.4	0	0.538462	1676.2	15883.1	0.0386933	1.88304	2.41667	0.107649	1.55556	144.222	797.621	77.6209	0	0
1120	3.52031e+06	5.37377e+06	Eningen unter Achalm	0	10.4627	3	0.388889	0.6	0.4	0.392857	1782.6	55197.8	0.0324588	1.29455	1.67437	0.110704	1.02949	1030.59	69.6419	69.6419	0	0
1121	3.52704e+06	5.38735e+06	Nürtingen	0	10.698	3	0.2	0.22314	0.315789	0.226277	2239.2	560943	0.0180042	1.36016	1.73962	0.12287	1.1157	247.487	432.695	247.891	0	0
1122	3.51948e+06	5.37828e+06	Metzingen	0	7.03213	3	0.2	0.214953	0.428571	0.165138	9054.9	761523	0.0136683	1.18686	1.56641	0.121267	1.33648	399.061	114.018	65	0	0
1123	3.53239e+06	5.38864e+06	Kirchheim unter Teck	1	8.12118	3	0.181818	0.241379	0.181818	0.245098	2437.5	41116.3	0.0224512	1.22208	1.69769	0.119627	1.30893	602.536	212.191	46.0977	0	0
1124	3.52651e+06	5.3767e+06	Dettingen an der Erms	1	10.0167	0	0.230769	0.166667	1	0.159091	745.4	829066	0.00919869	1.25849	1.75538	0.113123	1.88725	0	880.355	5	0	0
1125	3.51038e+06	5.37157e+06	Reutlingen	0	4.26068	3	0.21978	0.19774	0.205882	0.215686	909.9	774234	0.0129779	1.23563	1.5396	0.120979	1.29265	39.0512	145.344	36.0555	0	0
1126	3.51936e+06	5.378e+06	Metzingen	0	11.2976	3	0.2	0.214953	0.428571	0.165138	1814.9	761523	0.0136683	1.18686	1.56641	0.121267	1.33648	386.588	80.6226	80.6226	0	0
1127	3.54926e+06	5.3951e+06	Göppingen	1	3.34359	0	0.245902	0.57377	0.315789	0.36875	24492.9	521299	0.0169237	1.02208	1.4472	0.138668	1.15129	60	0	0	0	0
1128	3.53888e+06	5.39185e+06	Schlierbach	1	2.23044	3	0	0.333333	0	0.166667	5782.5	70060.6	0.0161015	1.39391	2.01306	0.0852391	1.14667	745.151	66.7083	66.7083	0	0
1129	3.53222e+06	5.38334e+06	Owen	0	5.85063	3	0.133333	0.47619	1	0.354167	1178.3	1.39443e+06	0.0107842	1.31243	1.74632	0.117756	1.05	695.845	317.53	70.1783	0	0
1130	3.50583e+06	5.36208e+06	Mössingen	0	14.8294	4	0.304348	0.11465	0	0.151316	24534.4	1.71355e+06	0.0133141	1.60177	2.13591	0.0976952	1.05316	1007.93	915.26	57.0088	0	1
1131	3.53872e+06	5.38969e+06	Ohmden	1	7.75381	0	0.5	0.103448	0	0.148148	543.4	464865	0.0102856	1.41308	2.06513	0.102155	1.23529	0	107.355	10	0	0
1132	3.49614e+06	5.3617e+06	Bodelshausen	1	2.46473	0	0.5	0.037037	0	0.25	0	37547.8	0.0297093	1.62158	2.06108	0.103155	1.18996	610.328	821.173	485	0	0
1133	3.50725e+06	5.36265e+06	Mössingen	0	5.4017	3	0.304348	0.11465	0	0.151316	893.3	402234	0.0211169	1.60177	2.13591	0.0976952	1.05316	1205.09	522.805	63.2456	0	1
1134	3.50679e+06	5.37245e+06	Kusterdingen	0	1.7603	1	0.259259	0.168675	1	0.153226	1137.3	29790.5	0.034982	1.39645	1.80254	0.10766	1.5061	681.212	1035.34	235	0	0
1135	3.50519e+06	5.36629e+06	Nehren	1	4.2216	0	0	0	0	0	280.4	49004.4	0.0210708	1.69551	2.29424	0.103814	1.45652	0	178.676	10	0	0
1136	3.50595e+06	5.36495e+06	Nehren	0	1.84728	3	0	0	0	0	674.3	1.29779e+06	0.0060432	1.69551	2.29424	0.103814	1.45652	666.033	891.992	70	0	0
1137	3.50673e+06	5.36903e+06	Gomaringen	0	8.86348	0	0.25	0.196429	0.5	0.155172	13982.6	54592.9	0.0496085	1.48373	1.85863	0.0970857	1.08571	5	309.233	46.0977	0	0
1138	3.55504e+06	5.39024e+06	Bad Überkingen	0	16.6165	0	0.153846	0.138889	0	0.172414	0	19572.5	0.0575536	1.28323	1.96022	0.122736	1.2766	434.166	229.02	229.02	0	0
1139	3.52782e+06	5.37815e+06	Neuffen	0	7.30865	3	0.333333	0.326531	0.333333	0.222222	1590.4	1.04757e+06	0.0118645	1.28788	1.79529	0.111786	1.13303	853.288	1142.64	116.726	0	0
1140	3.52537e+06	5.37667e+06	Dettingen an der Erms	0	6.52546	2	0.230769	0.166667	1	0.159091	1331.7	1.10291e+06	0.0123476	1.25849	1.75538	0.113123	1.88725	15	204.267	41.2311	0	0
1141	3.53754e+06	5.38397e+06	Bissingen an der Teck	0	16.8607	3	0.333333	0.212766	0.5	0.254237	3144.2	188298	0.0141442	1.35031	1.68719	0.114481	0.989418	879.574	284.297	99.6243	0	1
1142	3.51561e+06	5.36886e+06	Pfullingen	1	19.7652	0	0.363636	0.576923	0.285714	0.567568	5253.2	349775	0.0184245	1.16265	1.70163	0.117938	1.10118	0	223.607	15	0	0
1143	3.50679e+06	5.3734e+06	Kusterdingen	1	0.913541	0	0.259259	0.168675	1	0.153226	939.1	3073.97	0.0961546	1.39645	1.80254	0.10766	1.5061	0	789.177	15.8114	0	0
1144	3.54852e+06	5.39447e+06	Göppingen	1	3.12073	3	0.245902	0.57377	0.315789	0.36875	17486.6	37742.5	0.0308709	1.02208	1.4472	0.138668	1.15129	549.181	535.35	172.192	0	0
1145	3.52831e+06	5.38221e+06	Beuren	0	8.56669	3	0.076923	0.333333	0.333333	0.195652	212.9	249663	0.0175127	1.14684	1.5569	0.11726	1.02703	475.946	251.098	55	0	0
1146	3.53506e+06	5.39597e+06	Hochdorf	1	6.48354	2	0.052632	0.307692	1	0.129032	1616.3	539415	0.0175797	1.34266	2.08222	0.0941176	1.33333	258.312	750.483	50	0	0
1147	3.53884e+06	5.3894e+06	Ohmden	0	0.576205	3	0.5	0.103448	0	0.148148	1739.4	464865	0.0102856	1.41308	2.06513	0.102155	1.23529	208.866	20	20	0	0
1148	3.50529e+06	5.36624e+06	Nehren	1	2.79122	0	0	0	0	0	172.8	49004.4	0.0210708	1.69551	2.29424	0.103814	1.45652	0	215.928	39.0512	0	0
1149	3.52268e+06	5.38412e+06	Großbettlingen	1	0.12264	0	0.333333	0.222222	0	0.25	45591.5	62314.9	0.0222792	1.73035	2.47265	0.0858525	1.60976	0	230	33.541	0	0
1150	3.54099e+06	5.38262e+06	Neidlingen	0	16.1029	3	0.2	0.157143	1	0.114286	1466.5	1.48249e+06	0.00924149	1.31936	1.78261	0.10745	0.909091	330.341	586.899	345.398	0	0
1151	3.54532e+06	5.39752e+06	Göppingen	1	3.99246	0	0.245902	0.57377	0.315789	0.36875	784.3	175505	0.0147344	1.02208	1.4472	0.138668	1.15129	0	80.6226	15.8114	0	0
1152	3.54158e+06	5.39207e+06	Hattenhofen	0	3.56343	2	0.1	0.55	0	0.342105	1786.2	186622	0.0201534	1.84567	2.32571	0.107832	1.25893	36.4006	120.208	90.5538	0	0
1153	3.5285e+06	5.37837e+06	Neuffen	0	8.73576	3	0.333333	0.326531	0.333333	0.222222	1690.4	1.04757e+06	0.0118645	1.28788	1.79529	0.111786	1.13303	657.875	597.767	556.619	0	0
1154	3.52391e+06	5.37913e+06	Neuffen	0	6.19412	3	0.333333	0.326531	0.333333	0.222222	1863.1	2.35355e+06	0.00791344	1.28788	1.79529	0.111786	1.13303	202.608	99.6243	99.6243	0	0
1155	3.50796e+06	5.36927e+06	Gomaringen	0	5.80753	3	0.25	0.196429	0.5	0.155172	1980.6	146664	0.0146182	1.48373	1.85863	0.0970857	1.08571	42.4264	90.1388	39.0512	0	0
1156	3.51874e+06	5.38185e+06	Bempflingen	0	13.106	3	0.333333	0.363636	1	0.272727	1501.9	269162	0.020936	1.26159	1.79849	0.0983425	1.38889	233.773	230.489	230.489	0	0
1157	3.52774e+06	5.38299e+06	Frickenhausen	0	13.9917	3	0.125	0.076923	0.5	0.054054	286.8	1.08813e+06	0.00929233	1.19047	1.7225	0.103565	1.05882	25	481.067	41.2311	0	0
1158	3.52985e+06	5.38981e+06	Kirchheim unter Teck	1	4.99488	3	0.181818	0.241379	0.181818	0.245098	3172	80538.4	0.0242076	1.22208	1.69769	0.119627	1.30893	248.244	656.144	143.178	0	0
1159	3.50861e+06	5.36914e+06	Gomaringen	0	2.4739	3	0.25	0.196429	0.5	0.155172	1117.4	359254	0.0105774	1.48373	1.85863	0.0970857	1.08571	191.638	548.862	26.9258	0	0
1160	3.52077e+06	5.37685e+06	Metzingen	0	2.22665	3	0.2	0.214953	0.428571	0.165138	207922	110566	0.0133795	1.18686	1.56641	0.121267	1.33648	200.125	109.202	0	0	0
1161	3.51311e+06	5.37199e+06	Reutlingen	0	3.71079	0	0.21978	0.19774	0.205882	0.215686	779.7	597842	0.0117804	1.23563	1.5396	0.120979	1.29265	245.459	852.79	7.07107	0	0
1162	3.51573e+06	5.37814e+06	Reutlingen	0	0.716198	2	0.21978	0.19774	0.205882	0.215686	1332.1	4607.67	0.0708793	1.23563	1.5396	0.120979	1.29265	96.1769	651.153	74.3303	0	0
1163	3.50658e+06	5.37339e+06	Kusterdingen	1	1.56894	0	0.259259	0.168675	1	0.153226	763.7	3503.66	0.0957831	1.39645	1.80254	0.10766	1.5061	0	995.389	25.4951	0	0
1164	3.54416e+06	5.39727e+06	Uhingen	1	10.0706	3	0.380952	0.264706	0.8	0.318841	4343.8	38224.3	0.0287066	1.16457	1.74023	0.104612	1.14191	199.625	524.69	184.459	0	0
1165	3.50712e+06	5.3631e+06	Mössingen	0	13.4783	3	0.304348	0.11465	0	0.151316	497.6	402234	0.0211169	1.60177	2.13591	0.0976952	1.05316	772.787	494.419	184.391	0	1
1166	3.54197e+06	5.38155e+06	Neidlingen	0	10.9462	3	0.2	0.157143	1	0.114286	3130.8	63182.6	0.0226037	1.31936	1.78261	0.10745	0.909091	235.85	451.774	69.6419	0	0
1167	3.52567e+06	5.37626e+06	Dettingen an der Erms	1	24.0243	0	0.230769	0.166667	1	0.159091	144408	1.10291e+06	0.0123476	1.25849	1.75538	0.113123	1.88725	190.591	10	10	0	0
1168	3.5056e+06	5.36502e+06	Nehren	0	8.29402	3	0	0	0	0	2748.4	1.29779e+06	0.0060432	1.69551	2.29424	0.103814	1.45652	425.47	574.891	207.183	0	0
1169	3.49556e+06	5.36128e+06	Bodelshausen	0	2.98474	0	0.5	0.037037	0	0.25	0	30466.9	0.0278316	1.62158	2.06108	0.103155	1.18996	348.174	596.029	121.655	0	0
1170	3.50468e+06	5.36415e+06	Mössingen	0	2.30529	3	0.304348	0.11465	0	0.151316	1027.7	1.29779e+06	0.0060432	1.60177	2.13591	0.0976952	1.05316	35	355.106	42.4264	0	0
1171	3.54686e+06	5.39021e+06	Dürnau	0	3.88975	2	0.461538	0.545455	1	0.5	2752.5	105007	0.0330621	1.42809	2.06038	0.0877763	1.47761	264.008	748.949	38.0789	0	0
1172	3.51137e+06	5.36924e+06	Reutlingen	0	7.93167	3	0.21978	0.19774	0.205882	0.215686	286451	39939.9	0.0277773	1.23563	1.5396	0.120979	1.29265	1246.31	45	45	0	0
1173	3.53117e+06	5.38234e+06	Owen	0	9.35712	3	0.133333	0.47619	1	0.354167	109359	508268	0.0193484	1.31243	1.74632	0.117756	1.05	1120.58	168.671	168.671	0	0
1174	3.52346e+06	5.37813e+06	Metzingen	0	7.23997	3	0.2	0.214953	0.428571	0.165138	2547.2	2.35355e+06	0.00791344	1.18686	1.56641	0.121267	1.33648	741.772	778.621	212.191	0	0
1175	3.55341e+06	5.39098e+06	Schlat	0	8.29729	3	0.5	0.363636	0	0.361111	181120	39346.3	0.0309076	1.21365	1.90775	0.123203	1.17333	210.95	854.942	187.883	0	0
1176	3.53899e+06	5.3903e+06	Ohmden	0	14.5072	3	0.5	0.103448	0	0.148148	1022.5	584209	0.0130428	1.41308	2.06513	0.102155	1.23529	20	242.745	58.5235	0	0
1177	3.53664e+06	5.39004e+06	Kirchheim unter Teck	1	5.05527	3	0.181818	0.241379	0.181818	0.245098	1964	329072	0.0147349	1.22208	1.69769	0.119627	1.30893	729.4	280.401	29.1548	1	0
1178	3.54246e+06	5.38973e+06	Zell unter Aichelberg	1	1.41716	2	0.266667	0.291667	0	0.297297	2768.5	262210	0.0205352	2.1257	2.71429	0.101889	1.52475	15.8114	82.4621	15	0	0
1179	3.54582e+06	5.38954e+06	Boll	1	2.70642	2	0.285714	2.5	1	0.538462	3232	68412.9	0.0244689	1.35042	1.91502	0.160651	1.21591	128.55	291.247	11.1803	0	0
1180	3.53845e+06	5.39049e+06	Ohmden	1	5.88627	3	0.5	0.103448	0	0.148148	2794.3	584209	0.0130428	1.41308	2.06513	0.102155	1.23529	440.71	608.769	215.058	0	0
1181	3.54759e+06	5.39335e+06	Heiningen	0	8.9288	3	0.185185	0.526316	1	0.348837	49290	156470	0.0228275	1.53551	2.04153	0.103488	1.07647	950.645	170	112.361	0	0
1182	3.51549e+06	5.36891e+06	Pfullingen	0	5.72968	3	0.363636	0.576923	0.285714	0.567568	1303.5	349775	0.0184245	1.16265	1.70163	0.117938	1.10118	14.1421	321.753	18.0278	0	0
1183	3.55938e+06	5.39008e+06	Kuchen	0	10.0073	3	0.333333	1	0	0.6	2400	482787	0.0230543	1.02878	1.52941	0.11358	1.13072	385.519	1090.24	239.008	0	0
1184	3.52156e+06	5.37631e+06	Metzingen	0	5.39404	3	0.2	0.214953	0.428571	0.165138	883.5	505116	0.00726691	1.18686	1.56641	0.121267	1.33648	831.655	575.022	18.0278	0	0
1185	3.50205e+06	5.36078e+06	Mössingen	0	4.70553	3	0.304348	0.11465	0	0.151316	1812.7	581561	0.0200854	1.60177	2.13591	0.0976952	1.05316	551.112	1208.33	221.02	0	1
1186	3.5487e+06	5.39943e+06	Göppingen	0	8.69681	3	0.245902	0.57377	0.315789	0.36875	2763	43754.6	0.0346114	1.02208	1.4472	0.138668	1.15129	420.743	640	190	0	0
1187	3.53251e+06	5.38691e+06	Dettingen unter Teck	0	4.5886	3	0.2	0.049296	0	0.107692	1583.4	1.70997e+06	0.00989906	1.37194	1.76895	0.12934	1.03196	270.185	1126.11	75	0	0
1188	3.51576e+06	5.37828e+06	Reutlingen	1	0.410123	0	0.21978	0.19774	0.205882	0.215686	12773.4	261242	0.0157331	1.23563	1.5396	0.120979	1.29265	0	655.172	11.1803	0	0
1189	3.53361e+06	5.38395e+06	Owen	0	9.90897	3	0.133333	0.47619	1	0.354167	870.7	2.05861e+06	0.00932867	1.31243	1.74632	0.117756	1.05	52.2015	388.104	49.2443	0	0
1190	3.50322e+06	5.36468e+06	Ofterdingen	0	12.5042	3	0.363636	0.076923	1	0.142857	1834.8	239498	0.0229242	1.64931	2.09688	0.10547	0.946809	29.1548	194.165	103.078	0	0
1191	3.52069e+06	5.3791e+06	Metzingen	0	3.34264	3	0.2	0.214953	0.428571	0.165138	1942.5	139839	0.0121983	1.18686	1.56641	0.121267	1.33648	166.433	531.507	153.052	0	0
1192	3.51192e+06	5.37401e+06	Reutlingen	1	16.1199	3	0.21978	0.19774	0.205882	0.215686	180805	80034	0.0238469	1.23563	1.5396	0.120979	1.29265	127.279	389.005	123.794	0	0
1193	3.53516e+06	5.39536e+06	Hochdorf	1	14.4016	3	0.052632	0.307692	1	0.129032	1382.7	539415	0.0175797	1.34266	2.08222	0.0941176	1.33333	30	311.97	49.4975	0	0
1194	3.50422e+06	5.36582e+06	Nehren	0	28.984	0	0	0	0	0	5731.7	309862	0.009615	1.69551	2.29424	0.103814	1.45652	251.098	357.001	200	0	0
1195	3.51558e+06	5.37836e+06	Reutlingen	1	0.871234	0	0.21978	0.19774	0.205882	0.215686	396	261242	0.0157331	1.23563	1.5396	0.120979	1.29265	0	458.394	0	0	0
1196	3.52836e+06	5.37839e+06	Neuffen	0	6.27508	3	0.333333	0.326531	0.333333	0.222222	1064	1.04757e+06	0.0118645	1.28788	1.79529	0.111786	1.13303	602.433	642.748	425.823	0	0
1197	3.54176e+06	5.38419e+06	Weilheim an der Teck	0	13.7092	4	0.297297	0.193798	0.230769	0.204545	10972.2	127116	0.0271123	1.28113	1.82018	0.108577	1.03917	30.4138	1042.9	65	0	0
1198	3.53916e+06	5.39441e+06	Schlierbach	1	1.71642	3	0	0.333333	0	0.166667	3609.2	29462.3	0.0226062	1.39391	2.01306	0.0852391	1.14667	749.466	91.9239	91.9239	0	0
1199	3.51767e+06	5.37457e+06	Reutlingen	0	7.75512	0	0.21978	0.19774	0.205882	0.215686	922.1	851648	0.00670136	1.23563	1.5396	0.120979	1.29265	176.777	67.2681	67.2681	0	0
1200	3.55708e+06	5.39004e+06	Gingen an der Fils	0	7.94794	3	0.25	0.588235	0	0.535714	20362.3	7045.34	0.0519472	1.1043	1.56275	0.127738	1.25	936.937	789.177	317.53	0	0
1201	3.50133e+06	5.36102e+06	Mössingen	0	6.86585	4	0.304348	0.11465	0	0.151316	16787.6	581561	0.0200854	1.60177	2.13591	0.0976952	1.05316	816.165	1326.7	249.9	0	1
1202	3.54103e+06	5.38818e+06	Aichelberg	1	5.43825	0	1	0.4	0	0.538462	381.7	1.26914e+06	0.00550867	1.88304	2.41667	0.107649	1.55556	387.621	14.1421	14.1421	0	0
1203	3.54255e+06	5.38236e+06	Neidlingen	0	12.2147	3	0.2	0.157143	1	0.114286	3044.2	124359	0.0160526	1.31936	1.78261	0.10745	0.909091	176.139	536.027	35.3553	0	0
1204	3.53447e+06	5.38247e+06	Lenningen	0	13.5566	3	0.277778	0.221311	0	0.288288	1782.1	2.05861e+06	0.00932867	1.09145	1.55231	0.106074	0.965142	259.326	791.581	288.444	0	0
1205	3.51566e+06	5.37007e+06	Pfullingen	0	10.964	0	0.363636	0.576923	0.285714	0.567568	876.3	898104	0.00809342	1.16265	1.70163	0.117938	1.10118	277.354	736.088	95.5249	0	0
1206	3.51132e+06	5.36678e+06	Reutlingen	0	12.2859	3	0.21978	0.19774	0.205882	0.215686	1184.7	286101	0.0129011	1.23563	1.5396	0.120979	1.29265	90.1388	285	33.541	0	0
1207	3.51771e+06	5.36888e+06	Pfullingen	0	5.60871	3	0.363636	0.576923	0.285714	0.567568	1681.2	1.02441e+06	0.00879794	1.16265	1.70163	0.117938	1.10118	252.834	268.794	241.299	0	0
1208	3.51787e+06	5.36833e+06	Pfullingen	0	7.42746	3	0.363636	0.576923	0.285714	0.567568	542.5	1.02441e+06	0.00879794	1.16265	1.70163	0.117938	1.10118	435	404.753	20.6155	1	0
1209	3.53544e+06	5.39563e+06	Hochdorf	0	4.60464	3	0.052632	0.307692	1	0.129032	2675.7	539415	0.0175797	1.34266	2.08222	0.0941176	1.33333	276.632	580.775	25	0	0
1210	3.50747e+06	5.36449e+06	Mössingen	0	12.6311	3	0.304348	0.11465	0	0.151316	932.4	373172	0.0131412	1.60177	2.13591	0.0976952	1.05316	270.416	368.951	235	0	0
1211	3.50359e+06	5.36073e+06	Mössingen	0	8.34869	3	0.304348	0.11465	0	0.151316	2259.2	395296	0.0136412	1.60177	2.13591	0.0976952	1.05316	920.217	1519.91	222.991	0	1
1212	3.54936e+06	5.38982e+06	Heiningen	1	15.2114	3	0.185185	0.526316	1	0.348837	10007.2	111894	0.0296579	1.53551	2.04153	0.103488	1.07647	406.079	1229.84	53.8516	0	0
1213	3.51589e+06	5.37725e+06	Reutlingen	0	2.44718	2	0.21978	0.19774	0.205882	0.215686	688.5	61020.4	0.0220302	1.23563	1.5396	0.120979	1.29265	487.468	220	40.3113	0	0
1214	3.52738e+06	5.38877e+06	Oberboihingen	0	19.4451	0	0.285714	0.357143	0	0.444444	0	136649	0.0200102	1.40177	1.84244	0.101036	1.11644	814.279	538.911	538.911	0	0
1215	3.50198e+06	5.36078e+06	Mössingen	0	4.32968	0	0.304348	0.11465	0	0.151316	4462.4	581561	0.0200854	1.60177	2.13591	0.0976952	1.05316	559.933	1230.14	173.277	0	1
1216	3.52564e+06	5.37903e+06	Neuffen	0	6.71877	0	0.333333	0.326531	0.333333	0.222222	0	17257.3	0.0337281	1.28788	1.79529	0.111786	1.13303	820.686	1057.73	332.866	0	0
1217	3.50922e+06	5.37377e+06	Kusterdingen	0	1.86583	2	0.259259	0.168675	1	0.153226	666.9	5408.28	0.0594379	1.39645	1.80254	0.10766	1.5061	69.4622	44.7214	35.3553	0	0
1218	3.5021e+06	5.36733e+06	Dußlingen	0	4.02472	0	0.2	0.128205	0	0.090909	0	444598	0.020699	1.22642	1.77338	0.102978	0.989209	1620.86	2225.4	374.733	0	1
1219	3.54578e+06	5.38968e+06	Boll	1	7.2339	0	0.285714	2.5	1	0.538462	1302.7	68412.9	0.0244689	1.35042	1.91502	0.160651	1.21591	99.6243	423.586	65.7647	0	0
1220	3.52064e+06	5.37712e+06	Metzingen	1	3.47307	0	0.2	0.214953	0.428571	0.165138	197.7	5645	0.0632513	1.18686	1.56641	0.121267	1.33648	0	35.3553	11.1803	0	0
1221	3.53528e+06	5.38059e+06	Lenningen	0	29.4102	0	0.277778	0.221311	0	0.288288	0	1.54264e+06	0.0133674	1.09145	1.55231	0.106074	0.965142	456.426	876.385	302.2	0	0
1222	3.53471e+06	5.39238e+06	Notzingen	0	4.27852	3	0.2	0.16	0	0.181818	1987.9	35047.8	0.0298994	1.58633	2.37363	0.106287	1.20792	271.708	530	300.416	0	0
1223	3.53548e+06	5.38533e+06	Bissingen an der Teck	1	3.99636	3	0.333333	0.212766	0.5	0.254237	11426.4	1.06197e+06	0.0117425	1.35031	1.68719	0.114481	0.989418	526.925	688.204	228.035	0	0
1224	3.54258e+06	5.38978e+06	Zell unter Aichelberg	1	2.85461	0	0.266667	0.291667	0	0.297297	718.8	121175	0.0174194	2.1257	2.71429	0.101889	1.52475	0	101.98	14.1421	0	0
1225	3.53145e+06	5.38911e+06	Kirchheim unter Teck	0	6.18282	3	0.181818	0.241379	0.181818	0.245098	4778.8	134337	0.017645	1.22208	1.69769	0.119627	1.30893	525.952	39.0512	39.0512	0	0
1226	3.51559e+06	5.3704e+06	Pfullingen	0	20.8065	5	0.363636	0.576923	0.285714	0.567568	1766.1	898104	0.00809342	1.16265	1.70163	0.117938	1.10118	185.54	791.991	227.706	0	0
1227	3.52242e+06	5.37532e+06	Metzingen	0	15.1158	3	0.2	0.214953	0.428571	0.165138	815.2	227715	0.019749	1.18686	1.56641	0.121267	1.33648	341.211	332.039	122.066	0	0
1228	3.53395e+06	5.38388e+06	Owen	0	9.31844	3	0.133333	0.47619	1	0.354167	1457.5	2.05861e+06	0.00932867	1.31243	1.74632	0.117756	1.05	210.238	182.003	182.003	0	0
1229	3.50223e+06	5.36768e+06	Dußlingen	0	5.034	3	0.2	0.128205	0	0.090909	1614.4	444598	0.020699	1.22642	1.77338	0.102978	0.989209	1432.52	2121.82	441.814	0	0
1230	3.539e+06	5.38841e+06	Holzmaden	0	4.68989	3	1	0.166667	0	0.235294	2604.6	95363	0.0173961	1.40334	1.87306	0.117076	1.13889	199.06	197.8	194.165	0	0
1231	3.53823e+06	5.39155e+06	Schlierbach	0	1.66066	3	0	0.333333	0	0.166667	2412.4	440253	0.01217	1.39391	2.01306	0.0852391	1.14667	963.911	650.173	165.68	0	0
1232	3.54692e+06	5.39414e+06	Göppingen	0	9.38942	3	0.245902	0.57377	0.315789	0.36875	3771.8	261917	0.0182301	1.02208	1.4472	0.138668	1.15129	137.295	301.869	120.934	0	0
1233	3.51974e+06	5.38085e+06	Bempflingen	0	14.7409	3	0.333333	0.363636	1	0.272727	550.8	7353.77	0.101529	1.26159	1.79849	0.0983425	1.38889	47.1699	20	20	0	0
1234	3.51756e+06	5.38083e+06	Reutlingen	0	6.3362	3	0.21978	0.19774	0.205882	0.215686	1196.1	86443.5	0.0158685	1.23563	1.5396	0.120979	1.29265	25.4951	190.394	65	0	0
1235	3.51618e+06	5.37057e+06	Pfullingen	0	15.1351	4	0.363636	0.576923	0.285714	0.567568	2348.5	898104	0.00809342	1.16265	1.70163	0.117938	1.10118	10	183.576	7.07107	0	0
1236	3.51901e+06	5.37039e+06	Eningen unter Achalm	0	5.93832	3	0.388889	0.6	0.4	0.392857	4552.3	310933	0.0115632	1.29455	1.67437	0.110704	1.02949	336.786	938.203	82.4621	0	0
1237	3.50911e+06	5.36892e+06	Gomaringen	0	15.316	3	0.25	0.196429	0.5	0.155172	1035.9	359254	0.0105774	1.48373	1.85863	0.0970857	1.08571	715.14	506.211	253.476	0	0
1238	3.53525e+06	5.38146e+06	Lenningen	0	6.56036	3	0.277778	0.221311	0	0.288288	1169.1	1.54264e+06	0.0133674	1.09145	1.55231	0.106074	0.965142	598.352	1258.65	507.001	0	0
1239	3.52087e+06	5.38205e+06	Bempflingen	0	13.5962	3	0.333333	0.363636	1	0.272727	350.4	206858	0.0177282	1.26159	1.79849	0.0983425	1.38889	454.533	532.189	88.459	0	0
1240	3.54209e+06	5.38557e+06	Weilheim an der Teck	0	5.00698	3	0.297297	0.193798	0.230769	0.204545	1570.2	14955.3	0.0591644	1.28113	1.82018	0.108577	1.03917	1447.94	156.605	156.605	0	0
1241	3.52426e+06	5.37837e+06	Neuffen	0	8.57183	0	0.333333	0.326531	0.333333	0.222222	4196.6	2.35355e+06	0.00791344	1.28788	1.79529	0.111786	1.13303	254.657	207.183	207.183	0	0
1242	3.54918e+06	5.39425e+06	Heiningen	0	6.71687	2	0.185185	0.526316	1	0.348837	5767.4	29286.7	0.0307202	1.53551	2.04153	0.103488	1.07647	327.758	73.8241	73.8241	0	0
1243	3.54106e+06	5.38527e+06	Weilheim an der Teck	0	3.65808	3	0.297297	0.193798	0.230769	0.204545	2336.2	416375	0.00954846	1.28113	1.82018	0.108577	1.03917	962.873	479.088	251.645	0	0
1244	3.52635e+06	5.38223e+06	Frickenhausen	0	6.47034	0	0.125	0.076923	0.5	0.054054	192234	1.34387e+06	0.00860131	1.19047	1.7225	0.103565	1.05882	651.498	1037.11	10	0	0
1245	3.53212e+06	5.38603e+06	Dettingen unter Teck	1	6.48677	3	0.2	0.049296	0	0.107692	17581.5	1.70997e+06	0.00989906	1.37194	1.76895	0.12934	1.03196	887.482	1398.29	46.0977	0	0
1246	3.54789e+06	5.39904e+06	Göppingen	0	5.34093	3	0.245902	0.57377	0.315789	0.36875	1966.1	14131.6	0.0547079	1.02208	1.4472	0.138668	1.15129	31.6228	427.2	53.8516	0	0
1247	3.52478e+06	5.37619e+06	Dettingen an der Erms	0	7.46958	3	0.230769	0.166667	1	0.159091	2929.1	1.10291e+06	0.0123476	1.25849	1.75538	0.113123	1.88725	536.889	396.232	97.0824	0	0
1248	3.55796e+06	5.39033e+06	Gingen an der Fils	0	13.5779	3	0.25	0.588235	0	0.535714	3751.3	126122	0.0266443	1.1043	1.56275	0.127738	1.25	105.475	32.0156	32.0156	0	0
1249	3.55128e+06	5.39027e+06	Schlat	0	4.119	3	0.5	0.363636	0	0.361111	2179.6	201650	0.0267818	1.21365	1.90775	0.123203	1.17333	467.68	647.765	372.324	0	0
1250	3.51629e+06	5.37685e+06	Reutlingen	0	11.1287	3	0.21978	0.19774	0.205882	0.215686	1241.3	111588	0.0198436	1.23563	1.5396	0.120979	1.29265	228.09	348.174	71.5891	0	0
1251	3.52936e+06	5.39398e+06	Wendlingen am Neckar	0	0	0	0.357143	0.071429	0.333333	0.375	0	200062	0.0158362	1.17744	1.7408	0.0861055	1.28011	1125	1657.14	627.694	0	0
1252	3.51153e+06	5.36637e+06	Reutlingen	0	11.8379	3	0.21978	0.19774	0.205882	0.215686	1751.7	286101	0.0129011	1.23563	1.5396	0.120979	1.29265	107.355	309.233	143.962	0	0
1253	3.51094e+06	5.36686e+06	Reutlingen	0	1.78598	0	0.21978	0.19774	0.205882	0.215686	230.6	408466	0.0191366	1.23563	1.5396	0.120979	1.29265	0	100	5	0	0
1254	3.51968e+06	5.37331e+06	Eningen unter Achalm	1	6.81642	3	0.388889	0.6	0.4	0.392857	74669	13405.5	0.0664303	1.29455	1.67437	0.110704	1.02949	315.753	25	25	0	0
1255	3.52421e+06	5.38075e+06	Kohlberg	0	9.9506	4	0.25	0.076923	0	0.035714	210.5	270170	0.0168053	1.33489	1.88101	0.109253	1.40323	317.844	285.044	246.221	0	0
1256	3.51548e+06	5.37853e+06	Reutlingen	1	7.10136	0	0.21978	0.19774	0.205882	0.215686	5398.4	261242	0.0157331	1.23563	1.5396	0.120979	1.29265	0	297.405	0	0	0
1257	3.54661e+06	5.38858e+06	Dürnau	0	7.44076	3	0.461538	0.545455	1	0.5	2683.8	12514.6	0.0423992	1.42809	2.06038	0.0877763	1.47761	511.517	824.924	42.72	0	0
1258	3.54878e+06	5.38923e+06	Eschenbach	0	19.9058	4	0.142857	0.583333	0	0.375	12882.2	103799	0.026749	2.23722	2.98246	0.110795	1.37879	467.386	629.325	30.4138	0	0
1259	3.53761e+06	5.39461e+06	Ebersbach an der Fils	0	15.3229	3	0.288136	0.571429	0	0.370787	4370.9	24237.3	0.036558	1.1282	1.82888	0.0992791	1.14139	424.5	60.208	50	0	0
1260	3.51968e+06	5.37302e+06	Eningen unter Achalm	0	6.11656	3	0.388889	0.6	0.4	0.392857	5277.9	327921	0.0123519	1.29455	1.67437	0.110704	1.02949	57.0088	50	50	0	0
1261	3.55887e+06	5.38843e+06	Kuchen	0	8.88563	3	0.333333	1	0	0.6	1867.5	1.18824e+06	0.0115027	1.02878	1.52941	0.11358	1.13072	154.029	509.117	121.655	0	0
1262	3.5044e+06	5.36573e+06	Nehren	0	1.72071	3	0	0	0	0	1457	309862	0.009615	1.69551	2.29424	0.103814	1.45652	60.208	549.045	81.3941	0	0
1263	3.55696e+06	5.39261e+06	Gingen an der Fils	0	2.80563	2	0.25	0.588235	0	0.535714	65130.5	243599	0.019395	1.1043	1.56275	0.127738	1.25	217.083	297.741	255	0	0
1264	3.53245e+06	5.38682e+06	Dettingen unter Teck	0	2.29625	3	0.2	0.049296	0	0.107692	2674.1	1.70997e+06	0.00989906	1.37194	1.76895	0.12934	1.03196	349.607	1195	31.6228	0	0
1265	3.51755e+06	5.37165e+06	Eningen unter Achalm	0	9.76137	0	0.388889	0.6	0.4	0.392857	1664.3	783326	0.0104196	1.29455	1.67437	0.110704	1.02949	202.485	201.122	90	0	0
1266	3.54068e+06	5.39273e+06	Hattenhofen	1	6.18553	3	0.1	0.55	0	0.342105	27614.4	13413.4	0.0478168	1.84567	2.32571	0.107832	1.25893	532.353	397.146	103.078	0	0
1267	3.53191e+06	5.38666e+06	Dettingen unter Teck	0	5.8688	0	0.2	0.049296	0	0.107692	12294.9	1.70997e+06	0.00989906	1.37194	1.76895	0.12934	1.03196	912.812	1734.51	0	0	0
1268	3.52344e+06	5.37815e+06	Metzingen	0	10.97	3	0.2	0.214953	0.428571	0.165138	2547.2	2.35355e+06	0.00791344	1.18686	1.56641	0.121267	1.33648	759.227	755.05	184.459	0	0
1269	3.53495e+06	5.38019e+06	Lenningen	0	10.5937	0	0.277778	0.221311	0	0.288288	0	1.54264e+06	0.0133674	1.09145	1.55231	0.106074	0.965142	265.424	391.312	389.423	0	0
1270	3.53182e+06	5.38949e+06	Kirchheim unter Teck	1	3.97485	2	0.181818	0.241379	0.181818	0.245098	1997	29304.8	0.0241267	1.22208	1.69769	0.119627	1.30893	134.35	69.4622	69.4622	0	0
1271	3.53089e+06	5.39191e+06	Kirchheim unter Teck	1	4.91702	3	0.181818	0.241379	0.181818	0.245098	2009.5	163767	0.0222553	1.22208	1.69769	0.119627	1.30893	125.399	379.012	245	0	0
1272	3.51564e+06	5.36897e+06	Pfullingen	0	20.8669	3	0.363636	0.576923	0.285714	0.567568	799.2	349775	0.0184245	1.16265	1.70163	0.117938	1.10118	22.3607	311.97	62.6498	0	0
1273	3.52438e+06	5.37646e+06	Dettingen an der Erms	0	9.82166	3	0.230769	0.166667	1	0.159091	764	1.10291e+06	0.0123476	1.25849	1.75538	0.113123	1.88725	360.347	155	55.9017	0	0
1274	3.51963e+06	5.3787e+06	Metzingen	0	13.1765	3	0.2	0.214953	0.428571	0.165138	3302.1	761523	0.0136683	1.18686	1.56641	0.121267	1.33648	122.984	92.1954	92.1954	0	0
1275	3.52068e+06	5.37925e+06	Metzingen	0	4.55319	3	0.2	0.214953	0.428571	0.165138	1585.4	139839	0.0121983	1.18686	1.56641	0.121267	1.33648	211.483	556.102	185.607	0	0
1276	3.53245e+06	5.38285e+06	Owen	0	10.8892	3	0.133333	0.47619	1	0.354167	2006.5	1.39443e+06	0.0107842	1.31243	1.74632	0.117756	1.05	471.222	216.622	62.6498	0	0
1277	3.54248e+06	5.38929e+06	Zell unter Aichelberg	0	8.61059	3	0.266667	0.291667	0	0.297297	731.4	262210	0.0205352	2.1257	2.71429	0.101889	1.52475	331.436	356.931	11.1803	0	0
1278	3.52284e+06	5.37422e+06	Metzingen	0	11.0715	3	0.2	0.214953	0.428571	0.165138	7474.8	586556	0.010557	1.18686	1.56641	0.121267	1.33648	10	276.812	7.07107	0	0
1279	3.54063e+06	5.3868e+06	Weilheim an der Teck	0	2.65802	3	0.297297	0.193798	0.230769	0.204545	1120	421013	0.0168905	1.28113	1.82018	0.108577	1.03917	178.676	644.38	25.4951	0	0
1280	3.50343e+06	5.36882e+06	Dußlingen	0	3.39116	2	0.2	0.128205	0	0.090909	961.4	43571.4	0.0283127	1.22642	1.77338	0.102978	0.989209	421.1	1155	186.682	0	0
1281	3.52676e+06	5.37916e+06	Neuffen	0	16.2962	3	0.333333	0.326531	0.333333	0.222222	5335	674506	0.0153244	1.28788	1.79529	0.111786	1.13303	563.028	748.482	7.07107	0	0
1282	3.52434e+06	5.37768e+06	Dettingen an der Erms	0	7.59853	3	0.230769	0.166667	1	0.159091	231	2.35355e+06	0.00791344	1.25849	1.75538	0.113123	1.88725	316.741	286.225	215	0	0
1283	3.53681e+06	5.38399e+06	Bissingen an der Teck	0	13.0506	3	0.333333	0.212766	0.5	0.254237	1915.9	534268	0.0160772	1.35031	1.68719	0.114481	0.989418	255.196	415	174.141	0	1
1284	3.53394e+06	5.39217e+06	Notzingen	1	8.70788	3	0.2	0.16	0	0.181818	1409.1	42872.1	0.0451269	1.58633	2.37363	0.106287	1.20792	115	137.295	137.295	0	0
1285	3.50121e+06	5.36588e+06	Ofterdingen	0	3.74182	0	0.363636	0.076923	1	0.142857	8505.2	908719	0.0134922	1.64931	2.09688	0.10547	0.946809	870.761	1239.41	170.88	0	0
1286	3.54171e+06	5.39465e+06	Albershausen	0	1.54987	3	0.214286	0.6	1	0.375	3026.1	27711.6	0.0428627	1.36751	1.81129	0.104651	1.18939	100	212.191	125	0	0
1287	3.50253e+06	5.36915e+06	Dußlingen	0	1.78059	3	0.2	0.128205	0	0.090909	940.5	397964	0.0101867	1.22642	1.77338	0.102978	0.989209	1303.58	2070.66	403.887	0	0
1288	3.53247e+06	5.39143e+06	Kirchheim unter Teck	0	27.9308	0	0.181818	0.241379	0.181818	0.245098	2506.7	304064	0.0173842	1.22208	1.69769	0.119627	1.30893	114.018	50	50	0	0
1289	3.54095e+06	5.38692e+06	Weilheim an der Teck	0	11.8371	3	0.297297	0.193798	0.230769	0.204545	259280	1.26914e+06	0.00550867	1.28113	1.82018	0.108577	1.03917	205.73	853.302	135.093	0	0
1290	3.52662e+06	5.38225e+06	Frickenhausen	0	15.9922	3	0.125	0.076923	0.5	0.054054	1330.1	1.34387e+06	0.00860131	1.19047	1.7225	0.103565	1.05882	389.487	820.274	93.0054	0	0
1291	3.51763e+06	5.37008e+06	Pfullingen	1	8.85847	3	0.363636	0.576923	0.285714	0.567568	864.9	161588	0.0147898	1.16265	1.70163	0.117938	1.10118	49.2443	465	14.1421	0	0
1292	3.50762e+06	5.36476e+06	Mössingen	0	1.03413	3	0.304348	0.11465	0	0.151316	1184.6	58119.4	0.0321071	1.60177	2.13591	0.0976952	1.05316	545	595.756	90	0	0
1293	3.52691e+06	5.38231e+06	Frickenhausen	0	13.4854	3	0.125	0.076923	0.5	0.054054	1682	1.34387e+06	0.00860131	1.19047	1.7225	0.103565	1.05882	127.279	546.923	91.9239	0	0
1294	3.534e+06	5.38378e+06	Owen	0	9.73673	3	0.133333	0.47619	1	0.354167	1415.5	2.05861e+06	0.00932867	1.31243	1.74632	0.117756	1.05	269.258	71.5891	71.5891	0	0
1295	3.49824e+06	5.36049e+06	Hechingen	1	4.79069	0	0.236842	0.175	0	0.220126	4049.7	168327	0.0121397	1.18938	1.61633	0.133193	1.31471	152.398	221.359	180.278	0	0
1296	3.5127e+06	5.3737e+06	Reutlingen	1	10.8917	0	0.21978	0.19774	0.205882	0.215686	1630.4	115045	0.0187089	1.23563	1.5396	0.120979	1.29265	11.1803	129.711	52.2015	0	0
1297	3.51787e+06	5.36812e+06	Pfullingen	0	0.924634	3	0.363636	0.576923	0.285714	0.567568	960.7	1.02441e+06	0.00879794	1.16265	1.70163	0.117938	1.10118	481.274	275.772	151.162	1	0
1298	3.53278e+06	5.38845e+06	Kirchheim unter Teck	0	8.34154	3	0.181818	0.241379	0.181818	0.245098	9996.2	226243	0.0121098	1.22208	1.69769	0.119627	1.30893	463.276	148.408	49.4975	0	0
1299	3.52229e+06	5.38334e+06	Großbettlingen	0	14.6702	3	0.333333	0.222222	0	0.25	1641.6	109525	0.0177061	1.73035	2.47265	0.0858525	1.60976	220	365.308	160.702	0	0
1300	3.55237e+06	5.39482e+06	Eislingen/ Fils	1	1.10228	0	0.225	0.75	0.6	0.395833	595.6	111053	0.0270164	1.10179	1.50558	0.120292	1.10272	0	474.605	15	0	0
1301	3.53203e+06	5.38684e+06	Dettingen unter Teck	0	5.04843	3	0.2	0.049296	0	0.107692	2069.3	1.70997e+06	0.00989906	1.37194	1.76895	0.12934	1.03196	754.255	1609.48	203.961	0	0
1302	3.5271e+06	5.38507e+06	Nürtingen	0	5.56759	3	0.2	0.22314	0.315789	0.226277	1767.1	1.08813e+06	0.00929233	1.36016	1.73962	0.12287	1.1157	288.617	1034.52	297.069	0	0
1303	3.53394e+06	5.38549e+06	Dettingen unter Teck	0	10.1344	3	0.2	0.049296	0	0.107692	1043.8	2.05861e+06	0.00932867	1.37194	1.76895	0.12934	1.03196	546.443	491.172	197.294	0	0
1304	3.53567e+06	5.3837e+06	Bissingen an der Teck	0	8.49972	3	0.333333	0.212766	0.5	0.254237	5476.4	1.06197e+06	0.0117425	1.35031	1.68719	0.114481	0.989418	476.917	1275.16	255	0	1
1305	3.52449e+06	5.37637e+06	Dettingen an der Erms	0	5.66654	3	0.230769	0.166667	1	0.159091	3740.8	1.10291e+06	0.0123476	1.25849	1.75538	0.113123	1.88725	403.113	250	104.403	0	0
1306	3.52284e+06	5.38157e+06	Grafenberg	0	14.557	0	0	0.277778	0	0.235294	146.3	129369	0.0163015	1.70392	2.09511	0.0979192	1.56897	85.44	477.624	107.703	0	0
1307	3.50617e+06	5.36221e+06	Mössingen	1	12.8989	3	0.304348	0.11465	0	0.151316	24284.9	1.71355e+06	0.0133141	1.60177	2.13591	0.0976952	1.05316	1214.43	554.707	97.0824	0	1
1308	3.55155e+06	5.39066e+06	Schlat	0	7.39893	3	0.5	0.363636	0	0.361111	9993.2	197289	0.0199119	1.21365	1.90775	0.123203	1.17333	132.853	458.312	176.139	0	0
1309	3.50892e+06	5.36902e+06	Gomaringen	0	21.9549	3	0.25	0.196429	0.5	0.155172	579.2	359254	0.0105774	1.48373	1.85863	0.0970857	1.08571	512.104	512.64	192.354	0	0
1310	3.52939e+06	5.38235e+06	Beuren	0	12.1517	3	0.076923	0.333333	0.333333	0.195652	689.9	333570	0.0172854	1.14684	1.5569	0.11726	1.02703	450	496.488	181.728	0	0
1311	3.51986e+06	5.38439e+06	Altdorf	0	6.75902	0	0.6	0.04	0	0.142857	0	140615	0.0155097	2.09142	2.66667	0.0938375	1.67647	267.442	270.601	270.601	0	0
1312	3.53258e+06	5.38598e+06	Dettingen unter Teck	0	10.2923	3	0.2	0.049296	0	0.107692	511.4	1.70997e+06	0.00989906	1.37194	1.76895	0.12934	1.03196	433.417	932.55	217.083	0	0
1313	3.54161e+06	5.38425e+06	Weilheim an der Teck	0	3.00578	3	0.297297	0.193798	0.230769	0.204545	4561.1	127116	0.0271123	1.28113	1.82018	0.108577	1.03917	118.004	938.856	136.015	0	0
1314	3.529e+06	5.38091e+06	Beuren	0	6.39879	3	0.076923	0.333333	0.333333	0.195652	1728.3	149960	0.025762	1.14684	1.5569	0.11726	1.02703	53.1507	187.683	66.7083	0	0
1315	3.53827e+06	5.39212e+06	Schlierbach	0	3.42446	3	0	0.333333	0	0.166667	1249.4	440253	0.01217	1.39391	2.01306	0.0852391	1.14667	394.62	730.924	50.9902	0	0
1316	3.50508e+06	5.36253e+06	Mössingen	0	5.68464	3	0.304348	0.11465	0	0.151316	1695.3	1.71355e+06	0.0133141	1.60177	2.13591	0.0976952	1.05316	186.682	949.276	211.896	0	0
1317	3.51286e+06	5.37636e+06	Reutlingen	0	0.671189	2	0.21978	0.19774	0.205882	0.215686	1060.3	18120.7	0.0474681	1.23563	1.5396	0.120979	1.29265	18.0278	60	58.3095	0	0
1318	3.52654e+06	5.38638e+06	Nürtingen	1	7.42549	3	0.2	0.22314	0.315789	0.226277	3118	105802	0.0227242	1.36016	1.73962	0.12287	1.1157	131.244	325.269	84.8528	0	0
1319	3.50365e+06	5.3694e+06	Dußlingen	0	3.74893	3	0.2	0.128205	0	0.090909	1569.5	247311	0.0192261	1.22642	1.77338	0.102978	0.989209	555.788	961.301	239.426	0	0
1320	3.53148e+06	5.38893e+06	Kirchheim unter Teck	0	1.59343	2	0.181818	0.241379	0.181818	0.245098	2674.2	134337	0.017645	1.22208	1.69769	0.119627	1.30893	662.967	187.417	71.5891	0	0
1321	3.53353e+06	5.39315e+06	Notzingen	1	10.5526	3	0.2	0.16	0	0.181818	16228.5	168973	0.0183377	1.58633	2.37363	0.106287	1.20792	36.0555	40.3113	0	0	0
1322	3.51905e+06	5.37975e+06	Riederich	0	18.4638	3	0	0	0	0	2056.6	237486	0.0153029	1.66874	2.11765	0.101444	1.31193	98.2344	231.625	93.9415	0	0
1323	3.52556e+06	5.37964e+06	Kohlberg	0	11.5896	3	0.25	0.076923	0	0.035714	772.9	308893	0.0165857	1.33489	1.88101	0.109253	1.40323	259.278	524.047	296.985	0	0
1324	3.53986e+06	5.38322e+06	Weilheim an der Teck	0	15.3584	3	0.297297	0.193798	0.230769	0.204545	10264.8	1.48249e+06	0.00924149	1.28113	1.82018	0.108577	1.03917	199.123	11.1803	11.1803	0	0
1325	3.52896e+06	5.38183e+06	Beuren	0	8.13139	3	0.076923	0.333333	0.333333	0.195652	1319.3	41465.5	0.0389024	1.14684	1.5569	0.11726	1.02703	39.0512	162.635	82.7647	0	0
1326	3.54127e+06	5.38282e+06	Neidlingen	0	13.1441	0	0.2	0.157143	1	0.114286	771	1.48249e+06	0.00924149	1.31936	1.78261	0.10745	0.909091	0	243.977	28.2843	0	0
1327	3.52908e+06	5.38243e+06	Beuren	0	5.69588	3	0.076923	0.333333	0.333333	0.195652	1201.1	333570	0.0172854	1.14684	1.5569	0.11726	1.02703	368.409	307.002	85	0	0
1328	3.52557e+06	5.38075e+06	Kohlberg	0	9.88324	3	0.25	0.076923	0	0.035714	364.1	1.20814e+06	0.013945	1.33489	1.88101	0.109253	1.40323	221.02	480.833	180.347	0	0
1329	3.50887e+06	5.36806e+06	Gomaringen	0	5.51666	3	0.25	0.196429	0.5	0.155172	1646.2	154578	0.0124705	1.48373	1.85863	0.0970857	1.08571	747.412	357.351	11.1803	0	0
1330	3.53251e+06	5.38826e+06	Kirchheim unter Teck	1	2.5358	0	0.181818	0.241379	0.181818	0.245098	16486.9	226243	0.0121098	1.22208	1.69769	0.119627	1.30893	731.71	456.344	5	0	0
1331	3.50214e+06	5.36596e+06	Ofterdingen	0	2.87487	3	0.363636	0.076923	1	0.142857	1627.6	908719	0.0134922	1.64931	2.09688	0.10547	0.946809	524.976	1176.66	158.902	0	0
1332	3.51793e+06	5.37023e+06	Pfullingen	0	7.72318	3	0.363636	0.576923	0.285714	0.567568	1545.9	161588	0.0147898	1.16265	1.70163	0.117938	1.10118	265.754	766.975	143.178	0	0
1333	3.51746e+06	5.37168e+06	Eningen unter Achalm	0	9.39534	3	0.388889	0.6	0.4	0.392857	1800.8	783326	0.0104196	1.29455	1.67437	0.110704	1.02949	189.011	176.139	55	0	0
1334	3.5214e+06	5.37513e+06	Metzingen	0	4.43618	3	0.2	0.214953	0.428571	0.165138	1884.8	9096.23	0.0421474	1.18686	1.56641	0.121267	1.33648	1296.63	647.244	60.4152	0	0
1335	3.53798e+06	5.39148e+06	Schlierbach	0	4.25181	2	0	0.333333	0	0.166667	8997.8	440253	0.01217	1.39391	2.01306	0.0852391	1.14667	1096.64	900.222	63.6396	0	0
1336	3.52237e+06	5.38327e+06	Großbettlingen	0	6.35337	3	0.333333	0.222222	0	0.25	2671.5	109525	0.0177061	1.73035	2.47265	0.0858525	1.60976	145.774	377.16	125.897	0	0
1337	3.5155e+06	5.37033e+06	Pfullingen	0	19.625	0	0.363636	0.576923	0.285714	0.567568	2056.6	898104	0.00809342	1.16265	1.70163	0.117938	1.10118	83.8153	905.677	120.208	0	0
1338	3.51019e+06	5.37159e+06	Reutlingen	0	5.25076	3	0.21978	0.19774	0.205882	0.215686	1763.8	774234	0.0129779	1.23563	1.5396	0.120979	1.29265	102.956	255	116.297	0	0
1339	3.52659e+06	5.38344e+06	Frickenhausen	0	6.45595	3	0.125	0.076923	0.5	0.054054	1780.4	1.34387e+06	0.00860131	1.19047	1.7225	0.103565	1.05882	92.1954	294.364	120.104	0	0
1340	3.52162e+06	5.37583e+06	Metzingen	0	9.8886	3	0.2	0.214953	0.428571	0.165138	1178.3	505116	0.00726691	1.18686	1.56641	0.121267	1.33648	1130.24	931.786	265.754	0	0
1341	3.51562e+06	5.36733e+06	Pfullingen	0	6.56954	0	0.363636	0.576923	0.285714	0.567568	18390.9	520492	0.0100736	1.16265	1.70163	0.117938	1.10118	445.112	215.87	158.902	0	0
1342	3.53222e+06	5.38924e+06	Kirchheim unter Teck	1	0.96128	2	0.181818	0.241379	0.181818	0.245098	4115.8	31464.8	0.0342055	1.22208	1.69769	0.119627	1.30893	31.6228	120.208	61.0328	1	0
1343	3.5366e+06	5.38353e+06	Bissingen an der Teck	0	7.28274	3	0.333333	0.212766	0.5	0.254237	5158.1	534268	0.0160772	1.35031	1.68719	0.114481	0.989418	512.299	479.427	332.453	0	1
1344	3.5231e+06	5.38195e+06	Grafenberg	0	4.33223	3	0	0.277778	0	0.235294	1079.1	51788.6	0.0362648	1.70392	2.09511	0.0979192	1.56897	487.904	491.554	32.0156	0	0
1345	3.51555e+06	5.37075e+06	Reutlingen	1	18.1355	0	0.21978	0.19774	0.205882	0.215686	507.8	898104	0.00809342	1.23563	1.5396	0.120979	1.29265	18.0278	770	56.5685	0	0
1346	3.50235e+06	5.36595e+06	Ofterdingen	0	3.20143	3	0.363636	0.076923	1	0.142857	2686.9	908719	0.0134922	1.64931	2.09688	0.10547	0.946809	488.109	1155	275	0	0
1347	3.50891e+06	5.37371e+06	Kusterdingen	0	3.09325	2	0.259259	0.168675	1	0.153226	1438	23588.8	0.0260356	1.39645	1.80254	0.10766	1.5061	324.23	231.138	202.608	0	0
1348	3.51689e+06	5.37985e+06	Reutlingen	0	4.62524	2	0.21978	0.19774	0.205882	0.215686	938.6	94901.3	0.0332126	1.23563	1.5396	0.120979	1.29265	433.82	30	30	0	0
1349	3.53672e+06	5.38992e+06	Kirchheim unter Teck	1	4.31781	3	0.181818	0.241379	0.181818	0.245098	435	329072	0.0147349	1.22208	1.69769	0.119627	1.30893	644.302	140.801	70	1	0
1350	3.52328e+06	5.37417e+06	Metzingen	0	13.5188	3	0.2	0.214953	0.428571	0.165138	2314.5	242372	0.0124457	1.18686	1.56641	0.121267	1.33648	150.333	453.045	114.018	0	0
1351	3.5098e+06	5.36615e+06	Reutlingen	0	6.1926	3	0.21978	0.19774	0.205882	0.215686	44971.2	483983	0.0103605	1.23563	1.5396	0.120979	1.29265	440.965	152.069	152.069	0	0
1352	3.51812e+06	5.37032e+06	Pfullingen	0	13.5183	3	0.363636	0.576923	0.285714	0.567568	905.6	161588	0.0147898	1.16265	1.70163	0.117938	1.10118	468.028	900	120.104	0	0
1353	3.50973e+06	5.37176e+06	Reutlingen	0	5.79268	3	0.21978	0.19774	0.205882	0.215686	974.7	774234	0.0129779	1.23563	1.5396	0.120979	1.29265	470.346	636.573	182.003	0	0
1354	3.51035e+06	5.3664e+06	Reutlingen	1	2.8361	3	0.21978	0.19774	0.205882	0.215686	21303.9	483983	0.0103605	1.23563	1.5396	0.120979	1.29265	0	171.828	74.3303	0	0
1355	3.51994e+06	5.37333e+06	Eningen unter Achalm	0	5.50539	3	0.388889	0.6	0.4	0.392857	2874.6	327921	0.0123519	1.29455	1.67437	0.110704	1.02949	452.604	166.508	46.0977	0	0
1356	3.51338e+06	5.37167e+06	Reutlingen	0	4.51128	3	0.21978	0.19774	0.205882	0.215686	1537.2	597842	0.0117804	1.23563	1.5396	0.120979	1.29265	235.637	622.254	105.475	0	0
1357	3.51953e+06	5.37853e+06	Metzingen	0	3.59995	3	0.2	0.214953	0.428571	0.165138	56172	761523	0.0136683	1.18686	1.56641	0.121267	1.33648	290.904	269.119	110	0	0
1358	3.52322e+06	5.37514e+06	Metzingen	0	8.07073	3	0.2	0.214953	0.428571	0.165138	2006.6	23330.1	0.0449547	1.18686	1.56641	0.121267	1.33648	134.629	394.62	129.035	0	0
1359	3.52808e+06	5.38305e+06	Frickenhausen	0	13.3335	3	0.125	0.076923	0.5	0.054054	28690.8	1.08813e+06	0.00929233	1.19047	1.7225	0.103565	1.05882	325.96	607.474	28.2843	0	0
1360	3.53261e+06	5.38607e+06	Dettingen unter Teck	0	11.3063	3	0.2	0.049296	0	0.107692	1686.7	1.70997e+06	0.00989906	1.37194	1.76895	0.12934	1.03196	397.146	930.658	190.394	0	0
1361	3.54273e+06	5.38955e+06	Zell unter Aichelberg	0	5.16175	3	0.266667	0.291667	0	0.297297	5799.9	121175	0.0174194	2.1257	2.71429	0.101889	1.52475	193.003	144.309	144.309	0	0
1362	3.52425e+06	5.37576e+06	Dettingen an der Erms	0	9.36342	0	0.230769	0.166667	1	0.159091	0	1.10291e+06	0.0123476	1.25849	1.75538	0.113123	1.88725	1051.97	811.126	399.155	0	0
1363	3.52638e+06	5.37925e+06	Neuffen	0	5.68473	3	0.333333	0.326531	0.333333	0.222222	3301.3	674506	0.0153244	1.28788	1.79529	0.111786	1.13303	794.512	760.345	183.848	0	0
1364	3.53185e+06	5.39234e+06	Wernau (Neckar)	1	6.41635	3	0.285714	0.214286	0	0.384615	4947.9	8031.77	0.0677674	0.987809	1.53707	0.0834862	1.16606	690.959	93.0054	42.4264	0	0
1365	3.50283e+06	5.36915e+06	Dußlingen	0	2.39502	3	0.2	0.128205	0	0.090909	1017.9	397964	0.0101867	1.22642	1.77338	0.102978	0.989209	1069.23	1779.92	272.121	0	0
1366	3.53118e+06	5.38917e+06	Kirchheim unter Teck	1	4.6051	3	0.181818	0.241379	0.181818	0.245098	3016.5	59974.4	0.0285757	1.22208	1.69769	0.119627	1.30893	510	194.486	194.486	0	0
1367	3.52149e+06	5.3764e+06	Metzingen	0	10.4435	3	0.2	0.214953	0.428571	0.165138	776.6	505116	0.00726691	1.18686	1.56641	0.121267	1.33648	740.608	490.918	25	0	0
1368	3.53964e+06	5.3829e+06	Weilheim an der Teck	0	14.1046	4	0.297297	0.193798	0.230769	0.204545	14913.2	1.48249e+06	0.00924149	1.28113	1.82018	0.108577	1.03917	256.125	60.208	49.2443	0	0
1369	3.5176e+06	5.36945e+06	Pfullingen	1	2.57498	0	0.363636	0.576923	0.285714	0.567568	3115.9	1.02441e+06	0.00879794	1.16265	1.70163	0.117938	1.10118	0	407.983	0	0	0
1370	3.5017e+06	5.36607e+06	Ofterdingen	0	1.93725	3	0.363636	0.076923	1	0.142857	752.4	908719	0.0134922	1.64931	2.09688	0.10547	0.946809	836.212	1367.71	233.452	0	0
1371	3.53237e+06	5.38362e+06	Owen	0	4.83363	3	0.133333	0.47619	1	0.354167	1559.8	1.39443e+06	0.0107842	1.31243	1.74632	0.117756	1.05	471.832	528.867	300.375	0	0
1372	3.5095e+06	5.37605e+06	Kusterdingen	0	5.07191	2	0.259259	0.168675	1	0.153226	957.5	27696.5	0.0246138	1.39645	1.80254	0.10766	1.5061	227.431	349.178	118.849	0	0
1373	3.52808e+06	5.37851e+06	Neuffen	0	4.30614	3	0.333333	0.326531	0.333333	0.222222	2230.9	1.04757e+06	0.0118645	1.28788	1.79529	0.111786	1.13303	457.056	703.58	174.642	0	0
1374	3.52799e+06	5.38062e+06	Neuffen	0	11.5064	3	0.333333	0.326531	0.333333	0.222222	532.9	328248	0.0129061	1.28788	1.79529	0.111786	1.13303	120	210	161.4	0	0
1375	3.52669e+06	5.38111e+06	Neuffen	0	5.7868	3	0.333333	0.326531	0.333333	0.222222	1510.2	1.20814e+06	0.013945	1.28788	1.79529	0.111786	1.13303	572.931	1095	20.6155	0	0
1376	3.50541e+06	5.36436e+06	Mössingen	0	7.75398	3	0.304348	0.11465	0	0.151316	1981.7	1.29779e+06	0.0060432	1.60177	2.13591	0.0976952	1.05316	215.058	164.469	56.5685	0	0
1377	3.55797e+06	5.3925e+06	Donzdorf	0	5.45086	3	0.327273	0.537037	0	0.479592	1137.8	8121.24	0.0509851	1.1454	1.8843	0.103731	1.31707	327.605	1086.75	40.3113	0	0
1378	3.53379e+06	5.38519e+06	Dettingen unter Teck	0	7.36412	2	0.2	0.049296	0	0.107692	1532.3	2.05861e+06	0.00932867	1.37194	1.76895	0.12934	1.03196	679.779	413.552	409.939	0	0
1379	3.5317e+06	5.38882e+06	Kirchheim unter Teck	0	1.16992	2	0.181818	0.241379	0.181818	0.245098	2636.6	134337	0.017645	1.22208	1.69769	0.119627	1.30893	562.161	415.03	7.07107	0	0
1380	3.55817e+06	5.39208e+06	Gingen an der Fils	0	6.63235	3	0.25	0.588235	0	0.535714	23053.6	124436	0.0217808	1.1043	1.56275	0.127738	1.25	237.118	966.747	158.902	0	0
1381	3.55269e+06	5.39027e+06	Schlat	1	3.84251	3	0.5	0.363636	0	0.361111	3027.6	61042.1	0.0280843	1.21365	1.90775	0.123203	1.17333	400	734.932	82.7647	0	0
1382	3.53832e+06	5.39215e+06	Schlierbach	0	4.09559	3	0	0.333333	0	0.166667	2013.5	440253	0.01217	1.39391	2.01306	0.0852391	1.14667	354.401	693.578	93.4077	0	0
1383	3.52912e+06	5.39157e+06	Wendlingen am Neckar	0	3.20499	3	0.357143	0.071429	0.333333	0.375	1177.7	403361	0.00978381	1.17744	1.7408	0.0861055	1.28011	602.433	661.532	53.1507	0	0
1384	3.53505e+06	5.3887e+06	Kirchheim unter Teck	1	3.17618	4	0.181818	0.241379	0.181818	0.245098	956.9	260751	0.0226392	1.22208	1.69769	0.119627	1.30893	93.9415	533.971	155.322	0	0
1385	3.55836e+06	5.38872e+06	Kuchen	0	18.1152	3	0.333333	1	0	0.6	7328	1.18824e+06	0.0115027	1.02878	1.52941	0.11358	1.13072	136.565	597.013	134.164	0	0
1386	3.53512e+06	5.3955e+06	Hochdorf	1	5.3764	3	0.052632	0.307692	1	0.129032	1316.6	539415	0.0175797	1.34266	2.08222	0.0941176	1.33333	35.3553	457.056	56.5685	0	0
1387	3.55703e+06	5.39252e+06	Gingen an der Fils	0	0.73199	2	0.25	0.588235	0	0.535714	65130.5	243599	0.019395	1.1043	1.56275	0.127738	1.25	145.086	294.109	144.222	0	0
1388	3.52447e+06	5.38233e+06	Frickenhausen	0	14.985	3	0.125	0.076923	0.5	0.054054	430.1	83452.3	0.0199876	1.19047	1.7225	0.103565	1.05882	29.1548	159.138	26.9258	0	0
1389	3.53165e+06	5.39219e+06	Kirchheim unter Teck	1	4.55239	3	0.181818	0.241379	0.181818	0.245098	3515.9	37518.1	0.0263894	1.22208	1.69769	0.119627	1.30893	441.163	168.671	168.671	0	0
1390	3.53512e+06	5.38875e+06	Kirchheim unter Teck	1	3.31454	3	0.181818	0.241379	0.181818	0.245098	3051.8	260751	0.0226392	1.22208	1.69769	0.119627	1.30893	102.956	586.728	131.244	0	0
1391	3.54285e+06	5.3896e+06	Zell unter Aichelberg	1	7.24761	3	0.266667	0.291667	0	0.297297	9933.7	21222.3	0.0654363	2.1257	2.71429	0.101889	1.52475	101.242	95.1315	95.1315	0	0
1392	3.53262e+06	5.38681e+06	Dettingen unter Teck	0	5.91246	3	0.2	0.049296	0	0.107692	1090.5	1.70997e+06	0.00989906	1.37194	1.76895	0.12934	1.03196	201.122	1025	65.192	0	0
1393	3.54826e+06	5.39818e+06	Göppingen	1	13.8434	3	0.245902	0.57377	0.315789	0.36875	3950.3	50192.7	0.0372932	1.02208	1.4472	0.138668	1.15129	140.89	201.556	134.629	0	0
1394	3.52517e+06	5.37631e+06	Dettingen an der Erms	0	7.88039	3	0.230769	0.166667	1	0.159091	296928	1.10291e+06	0.0123476	1.25849	1.75538	0.113123	1.88725	385.13	194.486	173.925	0	0
1395	3.54088e+06	5.38733e+06	Weilheim an der Teck	0	12.2726	3	0.297297	0.193798	0.230769	0.204545	259280	1.26914e+06	0.00550867	1.28113	1.82018	0.108577	1.03917	10	627.096	25.4951	0	0
1396	3.53428e+06	5.39423e+06	Hochdorf	0	4.62111	2	0.052632	0.307692	1	0.129032	3638.9	195328	0.013884	1.34266	2.08222	0.0941176	1.33333	360.312	707.195	36.4006	0	0
1397	3.54393e+06	5.38848e+06	Boll	0	7.71163	3	0.285714	2.5	1	0.538462	9331.9	74271.8	0.0232453	1.35042	1.91502	0.160651	1.21591	143.178	961.574	156.924	0	0
1398	3.52744e+06	5.37923e+06	Neuffen	1	4.92869	0	0.333333	0.326531	0.333333	0.222222	30081.6	674506	0.0153244	1.28788	1.79529	0.111786	1.13303	0	510.612	53.1507	0	0
1399	3.53679e+06	5.38397e+06	Bissingen an der Teck	0	12.9458	3	0.333333	0.212766	0.5	0.254237	4393.8	534268	0.0160772	1.35031	1.68719	0.114481	0.989418	247.891	440.454	206.155	0	1
1400	3.50581e+06	5.36514e+06	Nehren	0	17.536	3	0	0	0	0	2245.5	1.29779e+06	0.0060432	1.69551	2.29424	0.103814	1.45652	431.393	674.129	202.237	0	0
1401	3.5225e+06	5.38186e+06	Grafenberg	1	8.23769	3	0	0.277778	0	0.235294	16753.5	154834	0.0158321	1.70392	2.09511	0.0979192	1.56897	269.119	789.256	227.266	0	0
1402	3.5464e+06	5.39252e+06	Heiningen	1	8.62849	3	0.185185	0.526316	1	0.348837	26121.6	4184.88	0.0794622	1.53551	2.04153	0.103488	1.07647	850.088	453.018	55	0	0
1403	3.53257e+06	5.38443e+06	Owen	0	4.66835	3	0.133333	0.47619	1	0.354167	6462.5	1.39443e+06	0.0107842	1.31243	1.74632	0.117756	1.05	341.76	642.067	180.347	0	0
1404	3.53572e+06	5.38464e+06	Bissingen an der Teck	0	9.37945	3	0.333333	0.212766	0.5	0.254237	1358	1.06197e+06	0.0117425	1.35031	1.68719	0.114481	0.989418	265.189	622.274	168.671	0	1
1405	3.51736e+06	5.37422e+06	Reutlingen	0	9.59624	3	0.21978	0.19774	0.205882	0.215686	2260	851648	0.00670136	1.23563	1.5396	0.120979	1.29265	125	123.491	123.491	0	0
1406	3.54025e+06	5.38331e+06	Weilheim an der Teck	0	11.7957	3	0.297297	0.193798	0.230769	0.204545	5843.5	1.48249e+06	0.00924149	1.28113	1.82018	0.108577	1.03917	372.055	378.319	134.164	0	0
1407	3.52835e+06	5.38093e+06	Neuffen	0	10.2009	3	0.333333	0.326531	0.333333	0.222222	1490.8	328248	0.0129061	1.28788	1.79529	0.111786	1.13303	35.3553	235.85	195.576	0	0
1408	3.50482e+06	5.36441e+06	Mössingen	1	6.70559	0	0.304348	0.11465	0	0.151316	956.4	1.29779e+06	0.0060432	1.60177	2.13591	0.0976952	1.05316	244.182	160	30	0	0
1409	3.50707e+06	5.36733e+06	Gomaringen	0	2.64899	3	0.25	0.196429	0.5	0.155172	756.8	276983	0.0102789	1.48373	1.85863	0.0970857	1.08571	250	821.173	5	0	0
1410	3.5319e+06	5.38374e+06	Owen	0	9.13807	3	0.133333	0.47619	1	0.354167	2974.2	1.39443e+06	0.0107842	1.31243	1.74632	0.117756	1.05	928.453	748.465	54.0833	0	0
1411	3.53487e+06	5.3958e+06	Hochdorf	0	5.92684	3	0.052632	0.307692	1	0.129032	1226.3	539415	0.0175797	1.34266	2.08222	0.0941176	1.33333	40	646.239	35.3553	0	0
1412	3.50164e+06	5.36046e+06	Mössingen	0	4.40767	3	0.304348	0.11465	0	0.151316	1095.1	581561	0.0200854	1.60177	2.13591	0.0976952	1.05316	977.203	1654.84	116.726	0	1
1413	3.5276e+06	5.38327e+06	Frickenhausen	0	15.9251	3	0.125	0.076923	0.5	0.054054	912.7	1.08813e+06	0.00929233	1.19047	1.7225	0.103565	1.05882	173.925	567.318	25	0	0
1414	3.52374e+06	5.37796e+06	Metzingen	0	9.14223	3	0.2	0.214953	0.428571	0.165138	724.1	2.35355e+06	0.00791344	1.18686	1.56641	0.121267	1.33648	662.005	785.875	110.68	0	0
1415	3.5383e+06	5.38455e+06	Bissingen an der Teck	1	4.50598	3	0.333333	0.212766	0.5	0.254237	10262	26180	0.0364243	1.35031	1.68719	0.114481	0.989418	1318.22	1049.4	96.1769	0	1
1416	3.51973e+06	5.38096e+06	Bempflingen	0	16.0769	3	0.333333	0.363636	1	0.272727	2017.8	7353.77	0.101529	1.26159	1.79849	0.0983425	1.38889	131.244	15.8114	15.8114	0	0
1417	3.54663e+06	5.38849e+06	Dürnau	0	19.9045	4	0.461538	0.545455	1	0.5	65319.3	28372.1	0.0338824	1.42809	2.06038	0.0877763	1.47761	563.05	925	51.4781	0	0
1418	3.52732e+06	5.38411e+06	Frickenhausen	0	1.87277	2	0.125	0.076923	0.5	0.054054	955.9	1.08813e+06	0.00929233	1.19047	1.7225	0.103565	1.05882	115.434	580.539	35	0	0
1419	3.52495e+06	5.37851e+06	Dettingen an der Erms	0	16.8104	3	0.230769	0.166667	1	0.159091	914.6	2.35355e+06	0.00791344	1.25849	1.75538	0.113123	1.88725	429.942	485.824	475.631	0	0
1420	3.52731e+06	5.38399e+06	Frickenhausen	0	4.22619	3	0.125	0.076923	0.5	0.054054	1667.6	1.08813e+06	0.00929233	1.19047	1.7225	0.103565	1.05882	105.475	527.376	111.018	0	0
1421	3.54141e+06	5.38362e+06	Neidlingen	0	20.16	3	0.2	0.157143	1	0.114286	1810.4	881477	0.0160684	1.31936	1.78261	0.10745	0.909091	223.886	393.224	67.2681	0	0
1422	3.54562e+06	5.39298e+06	Göppingen	0	1.98915	3	0.245902	0.57377	0.315789	0.36875	4470.9	15071.1	0.0466088	1.02208	1.4472	0.138668	1.15129	199.123	88.459	88.459	0	0
1423	3.52654e+06	5.37759e+06	Dettingen an der Erms	0	5.07881	3	0.230769	0.166667	1	0.159091	2139.8	829066	0.00919869	1.25849	1.75538	0.113123	1.88725	258.118	1575.79	18.0278	0	0
1424	3.52432e+06	5.37647e+06	Dettingen an der Erms	0	5.34709	0	0.230769	0.166667	1	0.159091	1572.5	1.10291e+06	0.0123476	1.25849	1.75538	0.113123	1.88725	385.032	145	5	0	0
1425	3.53719e+06	5.39561e+06	Ebersbach an der Fils	1	14.008	5	0.288136	0.571429	0	0.370787	874.2	48094.9	0.0286415	1.1282	1.82888	0.0992791	1.14139	39.0512	382.099	25	0	0
1426	3.5403e+06	5.38271e+06	Neidlingen	0	11.7954	4	0.2	0.157143	1	0.114286	37611.5	1.48249e+06	0.00924149	1.31936	1.78261	0.10745	0.909091	840.015	551.725	333.542	0	0
1427	3.55712e+06	5.39243e+06	Gingen an der Fils	0	0.673396	2	0.25	0.588235	0	0.535714	65130.5	243599	0.019395	1.1043	1.56275	0.127738	1.25	25	314.841	22.3607	0	0
1428	3.52705e+06	5.38108e+06	Neuffen	0	6.69289	3	0.333333	0.326531	0.333333	0.222222	1654	1.20814e+06	0.013945	1.28788	1.79529	0.111786	1.13303	240.832	733.843	31.6228	0	0
1429	3.50214e+06	5.36629e+06	Ofterdingen	0	3.40862	2	0.363636	0.076923	1	0.142857	1225.8	908719	0.0134922	1.64931	2.09688	0.10547	0.946809	840.372	1500.22	228.035	0	0
1430	3.5245e+06	5.37823e+06	Neuffen	1	13.5341	3	0.333333	0.326531	0.333333	0.222222	473.2	2.35355e+06	0.00791344	1.28788	1.79529	0.111786	1.13303	325.576	10	10	0	0
1431	3.53997e+06	5.38552e+06	Weilheim an der Teck	0	7.6905	3	0.297297	0.193798	0.230769	0.204545	990.4	1.55086e+06	0.00669018	1.28113	1.82018	0.108577	1.03917	335.41	355.563	7.07107	1	0
1432	3.55767e+06	5.38945e+06	Kuchen	0	10.6061	3	0.333333	1	0	0.6	747.5	72359.5	0.0230552	1.02878	1.52941	0.11358	1.13072	718.905	688.077	47.1699	0	0
1433	3.51316e+06	5.37225e+06	Reutlingen	0	2.5606	3	0.21978	0.19774	0.205882	0.215686	1367	597842	0.0117804	1.23563	1.5396	0.120979	1.29265	281.514	606.012	85	0	0
1434	3.53031e+06	5.38599e+06	Dettingen unter Teck	1	9.6562	5	0.2	0.049296	0	0.107692	4385.3	28422.2	0.0323166	1.37194	1.76895	0.12934	1.03196	2173.03	1496.7	248.244	0	0
1435	3.52804e+06	5.37879e+06	Neuffen	0	3.79403	3	0.333333	0.326531	0.333333	0.222222	1333.9	1.04757e+06	0.0118645	1.28788	1.79529	0.111786	1.13303	199.625	542.333	31.6228	0	0
1436	3.53325e+06	5.39343e+06	Notzingen	0	1.70121	3	0.2	0.16	0	0.181818	887.9	84110	0.0205301	1.58633	2.37363	0.106287	1.20792	382.426	87.3212	87.3212	0	0
1437	3.5099e+06	5.37402e+06	Kusterdingen	1	7.64353	0	0.259259	0.168675	1	0.153226	690.8	28506.1	0.0312232	1.39645	1.80254	0.10766	1.5061	0	536.656	11.1803	0	0
1438	3.50199e+06	5.3662e+06	Ofterdingen	0	2.99547	2	0.363636	0.076923	1	0.142857	1227.7	908719	0.0134922	1.64931	2.09688	0.10547	0.946809	793.095	1422.12	65	0	0
1439	3.52448e+06	5.38006e+06	Kohlberg	1	10.9756	0	0.25	0.076923	0	0.035714	531.1	270170	0.0168053	1.33489	1.88101	0.109253	1.40323	0	80	5	0	0
1440	3.53234e+06	5.38589e+06	Dettingen unter Teck	0	13.2369	3	0.2	0.049296	0	0.107692	893.6	1.70997e+06	0.00989906	1.37194	1.76895	0.12934	1.03196	694.586	1156.25	208.087	0	0
1441	3.51937e+06	5.37817e+06	Metzingen	0	5.82947	3	0.2	0.214953	0.428571	0.165138	3008	761523	0.0136683	1.18686	1.56641	0.121267	1.33648	433.849	71.5891	71.5891	0	0
1442	3.54077e+06	5.3878e+06	Weilheim an der Teck	1	0.0641212	0	0.297297	0.193798	0.230769	0.204545	61948.7	1.26914e+06	0.00550867	1.28113	1.82018	0.108577	1.03917	0	215.87	26.9258	0	0
1443	3.51879e+06	5.38384e+06	Neckartenzlingen	0	1.75716	0	0	0.1	1	0.266667	0	219352	0.0200933	1.30354	1.90761	0.0887945	1.23404	228.09	183.439	183.439	0	0
1444	3.54878e+06	5.38928e+06	Eschenbach	0	18.1604	4	0.142857	0.583333	0	0.375	12882.2	103799	0.026749	2.23722	2.98246	0.110795	1.37879	446.598	676.757	40	0	0
1445	3.5458e+06	5.39847e+06	Wangen	0	15.1694	3	0.136364	0.277778	0	0.230769	37135.7	28961.8	0.0457779	1.16083	1.83166	0.11236	1.1783	482.105	669.795	40.3113	0	0
1446	3.54905e+06	5.39911e+06	Göppingen	0	9.32455	3	0.245902	0.57377	0.315789	0.36875	8377.1	71138.7	0.0307052	1.02208	1.4472	0.138668	1.15129	223.886	273.724	237.171	0	0
1447	3.51871e+06	5.37808e+06	Metzingen	0	5.5014	3	0.2	0.214953	0.428571	0.165138	2616.5	761523	0.0136683	1.18686	1.56641	0.121267	1.33648	1035.01	237.539	18.0278	0	0
1448	3.52748e+06	5.38126e+06	Neuffen	0	11.637	3	0.333333	0.326531	0.333333	0.222222	784.5	1.34387e+06	0.00860131	1.28788	1.79529	0.111786	1.13303	320.039	289.353	289.353	0	0
1449	3.53365e+06	5.38408e+06	Owen	0	13.1133	3	0.133333	0.47619	1	0.354167	498	2.05861e+06	0.00932867	1.31243	1.74632	0.117756	1.05	80	430.262	98.4886	0	0
1450	3.52675e+06	5.383e+06	Frickenhausen	0	12.8947	3	0.125	0.076923	0.5	0.054054	2324.7	1.34387e+06	0.00860131	1.19047	1.7225	0.103565	1.05882	228.528	302.655	61.8466	0	0
1451	3.50759e+06	5.36496e+06	Mössingen	0	6.56653	3	0.304348	0.11465	0	0.151316	773.8	58119.4	0.0321071	1.60177	2.13591	0.0976952	1.05316	729.538	688.204	105	0	0
1452	3.52888e+06	5.38245e+06	Beuren	0	18.5719	3	0.076923	0.333333	0.333333	0.195652	800.6	333570	0.0172854	1.14684	1.5569	0.11726	1.02703	378.55	181.177	181.177	0	0
1453	3.5395e+06	5.38588e+06	Weilheim an der Teck	0	8.50062	3	0.297297	0.193798	0.230769	0.204545	1162.4	1.55086e+06	0.00669018	1.28113	1.82018	0.108577	1.03917	276.586	532.4	228.035	1	0
1454	3.55817e+06	5.39204e+06	Gingen an der Fils	0	6.13508	3	0.25	0.588235	0	0.535714	23053.6	124436	0.0217808	1.1043	1.56275	0.127738	1.25	221.923	939.002	115.109	0	0
1455	3.51744e+06	5.37768e+06	Reutlingen	0	4.07209	3	0.21978	0.19774	0.205882	0.215686	858.4	69868.8	0.0329417	1.23563	1.5396	0.120979	1.29265	346.591	152.069	18.0278	0	0
1456	3.53298e+06	5.39218e+06	Notzingen	1	14.4347	3	0.2	0.16	0	0.181818	2040.6	97371.2	0.0324604	1.58633	2.37363	0.106287	1.20792	206.7	335	314.006	0	0
1457	3.53825e+06	5.38927e+06	Holzmaden	0	5.91459	3	1	0.166667	0	0.235294	1183.6	464865	0.0102856	1.40334	1.87306	0.117076	1.13889	152.971	540.833	215.058	0	0
1458	3.53246e+06	5.38678e+06	Dettingen unter Teck	0	2.59802	3	0.2	0.049296	0	0.107692	5329.3	1.70997e+06	0.00989906	1.37194	1.76895	0.12934	1.03196	346.771	1175	14.1421	0	0
1459	3.51975e+06	5.38412e+06	Altdorf	0	3.37076	2	0.6	0.04	0	0.142857	5181.5	140615	0.0155097	2.09142	2.66667	0.0938375	1.67647	106.301	140.089	140.089	0	0
1460	3.51704e+06	5.37974e+06	Reutlingen	0	7.37314	2	0.21978	0.19774	0.205882	0.215686	847.9	94901.3	0.0332126	1.23563	1.5396	0.120979	1.29265	362.353	156.525	147.054	0	0
1461	3.53308e+06	5.38628e+06	Dettingen unter Teck	0	10.9136	3	0.2	0.049296	0	0.107692	1070	1.70997e+06	0.00989906	1.37194	1.76895	0.12934	1.03196	35.3553	517.904	35	0	0
1462	3.53423e+06	5.37955e+06	Lenningen	0	7.854	0	0.277778	0.221311	0	0.288288	0	296509	0.0134553	1.09145	1.55231	0.106074	0.965142	301.04	545.619	545.619	0	0
1463	3.52801e+06	5.38072e+06	Neuffen	0	10.8141	3	0.333333	0.326531	0.333333	0.222222	1474.3	328248	0.0129061	1.28788	1.79529	0.111786	1.13303	116.297	225	97.0824	0	0
1464	3.54109e+06	5.38272e+06	Neidlingen	0	12.2235	3	0.2	0.157143	1	0.114286	3797.8	1.48249e+06	0.00924149	1.31936	1.78261	0.10745	0.909091	191.377	445.533	205.548	0	0
1465	3.51539e+06	5.36881e+06	Pfullingen	0	8.26999	3	0.363636	0.576923	0.285714	0.567568	1341.4	349775	0.0184245	1.16265	1.70163	0.117938	1.10118	120.934	298.203	93.0054	0	0
1466	3.52617e+06	5.38185e+06	Neuffen	0	14.3866	4	0.333333	0.326531	0.333333	0.222222	825	1.34387e+06	0.00860131	1.28788	1.79529	0.111786	1.13303	988.13	1357.65	212.132	0	0
1467	3.51414e+06	5.37417e+06	Reutlingen	1	10.365	0	0.21978	0.19774	0.205882	0.215686	372.8	67453	0.0276775	1.23563	1.5396	0.120979	1.29265	0	404.599	7.07107	0	0
1468	3.52776e+06	5.37901e+06	Neuffen	1	2.89852	3	0.333333	0.326531	0.333333	0.222222	1583.8	1.04757e+06	0.0118645	1.28788	1.79529	0.111786	1.13303	109.772	551.543	14.1421	0	0
1469	3.5256e+06	5.37897e+06	Neuffen	0	11.3015	0	0.333333	0.326531	0.333333	0.222222	0	17257.3	0.0337281	1.28788	1.79529	0.111786	1.13303	873.613	1128.42	395.127	0	0
1470	3.52623e+06	5.38197e+06	Frickenhausen	0	16.6787	3	0.125	0.076923	0.5	0.054054	1019.1	1.34387e+06	0.00860131	1.19047	1.7225	0.103565	1.05882	864.017	1290.47	89.4427	0	0
1471	3.53927e+06	5.38588e+06	Weilheim an der Teck	0	4.44394	3	0.297297	0.193798	0.230769	0.204545	744	1.55086e+06	0.00669018	1.28113	1.82018	0.108577	1.03917	140.89	481.69	105.119	1	0
1472	3.50757e+06	5.36472e+06	Mössingen	0	3.73395	3	0.304348	0.11465	0	0.151316	740.6	58119.4	0.0321071	1.60177	2.13591	0.0976952	1.05316	503.587	561.471	129.711	0	0
1473	3.54918e+06	5.3973e+06	Göppingen	0	3.77453	3	0.245902	0.57377	0.315789	0.36875	7129.7	70529.8	0.016835	1.02208	1.4472	0.138668	1.15129	33.541	592.663	30	0	0
1474	3.55203e+06	5.39439e+06	Eislingen/ Fils	0	2.9248	0	0.225	0.75	0.6	0.395833	2257.1	27466.6	0.0312296	1.10179	1.50558	0.120292	1.10272	11.1803	221.02	7.07107	0	0
1475	3.5153e+06	5.36887e+06	Pfullingen	0	12.9055	4	0.363636	0.576923	0.285714	0.567568	2313.5	349775	0.0184245	1.16265	1.70163	0.117938	1.10118	186.078	396.295	50	0	0
1476	3.54913e+06	5.39377e+06	Heiningen	1	9.14334	3	0.185185	0.526316	1	0.348837	12106.7	24573.3	0.0393048	1.53551	2.04153	0.103488	1.07647	696.455	203.039	203.039	0	0
1477	3.52141e+06	5.37539e+06	Metzingen	0	9.43966	3	0.2	0.214953	0.428571	0.165138	787	15696.8	0.0432757	1.18686	1.56641	0.121267	1.33648	1319.87	845.946	122.984	0	0
1478	3.49725e+06	5.36164e+06	Bodelshausen	0	5.92428	3	0.5	0.037037	0	0.25	894	38114.9	0.0473618	1.62158	2.06108	0.103155	1.18996	150.416	833.262	47.1699	0	0
1479	3.54301e+06	5.3977e+06	Uhingen	1	6.5363	3	0.380952	0.264706	0.8	0.318841	6827.7	13220.4	0.052252	1.16457	1.74023	0.104612	1.14191	76.3217	182.003	73.8241	0	0
1480	3.54126e+06	5.38268e+06	Neidlingen	0	17.2398	3	0.2	0.157143	1	0.114286	2611.6	1.48249e+06	0.00924149	1.31936	1.78261	0.10745	0.909091	95.5249	328.71	135.093	0	0
1481	3.52027e+06	5.36962e+06	Eningen unter Achalm	1	6.54519	3	0.388889	0.6	0.4	0.392857	272521	69859.4	0.0215997	1.29455	1.67437	0.110704	1.02949	1372.44	2289.79	534.72	0	0
1482	3.54186e+06	5.38381e+06	Weilheim an der Teck	0	13.2313	4	0.297297	0.193798	0.230769	0.204545	7417.3	881477	0.0160684	1.28113	1.82018	0.108577	1.03917	281.514	854.181	310	0	0
1483	3.49661e+06	5.36195e+06	Bodelshausen	0	2.28607	0	0.5	0.037037	0	0.25	0	97033.9	0.0257311	1.62158	2.06108	0.103155	1.18996	436.033	1218.03	320.975	0	0
1484	3.52311e+06	5.37825e+06	Metzingen	0	7.55069	3	0.2	0.214953	0.428571	0.165138	970.4	2.35355e+06	0.00791344	1.18686	1.56641	0.121267	1.33648	768.407	565.442	120.83	0	0
1485	3.50574e+06	5.36545e+06	Nehren	0	4.20592	3	0	0	0	0	5869.2	1.29779e+06	0.0060432	1.69551	2.29424	0.103814	1.45652	172.047	456.07	56.5685	0	0
1486	3.51199e+06	5.37403e+06	Reutlingen	1	11.0265	3	0.21978	0.19774	0.205882	0.215686	180805	80034	0.0238469	1.23563	1.5396	0.120979	1.29265	60.208	318.002	56.5685	0	0
1487	3.53921e+06	5.38592e+06	Weilheim an der Teck	0	8.86754	3	0.297297	0.193798	0.230769	0.204545	440.7	1.55086e+06	0.00669018	1.28113	1.82018	0.108577	1.03917	76.1577	440.596	61.8466	1	0
1488	3.54177e+06	5.38989e+06	Zell unter Aichelberg	1	4.68328	3	0.266667	0.291667	0	0.297297	1726.9	262210	0.0205352	2.1257	2.71429	0.101889	1.52475	191.638	70	70	0	0
1489	3.50382e+06	5.36117e+06	Mössingen	0	12.9508	3	0.304348	0.11465	0	0.151316	540.4	395296	0.0136412	1.60177	2.13591	0.0976952	1.05316	543.53	1351.68	156.605	0	1
1490	3.51772e+06	5.36916e+06	Pfullingen	0	10.1207	3	0.363636	0.576923	0.285714	0.567568	1260.5	1.02441e+06	0.00879794	1.16265	1.70163	0.117938	1.10118	70	393.573	100.125	0	0
1491	3.50187e+06	5.36647e+06	Ofterdingen	0	2.86416	0	0.363636	0.076923	1	0.142857	0	908719	0.0134922	1.64931	2.09688	0.10547	0.946809	1091.17	1712.38	116.726	0	1
1492	3.52749e+06	5.38318e+06	Frickenhausen	0	11.3678	3	0.125	0.076923	0.5	0.054054	1353.6	1.08813e+06	0.00929233	1.19047	1.7225	0.103565	1.05882	40.3113	430.116	49.2443	0	0
1493	3.54253e+06	5.39412e+06	Uhingen	1	8.91625	3	0.380952	0.264706	0.8	0.318841	3218.8	20443.6	0.0330489	1.16457	1.74023	0.104612	1.14191	99.6243	270.416	107.005	0	0
1494	3.53492e+06	5.38023e+06	Lenningen	0	9.00937	0	0.277778	0.221311	0	0.288288	0	1.54264e+06	0.0133674	1.09145	1.55231	0.106074	0.965142	246.221	386.846	355.985	0	0
1495	3.53276e+06	5.38578e+06	Dettingen unter Teck	0	5.27307	0	0.2	0.049296	0	0.107692	3712.3	1.70997e+06	0.00989906	1.37194	1.76895	0.12934	1.03196	343.839	717.809	45	0	0
1496	3.50699e+06	5.36862e+06	Gomaringen	0	3.12917	3	0.25	0.196429	0.5	0.155172	1809.3	98374.8	0.0245807	1.48373	1.85863	0.0970857	1.08571	15.8114	95.5249	47.4342	0	0
1497	3.53474e+06	5.39013e+06	Kirchheim unter Teck	1	4.22527	0	0.181818	0.241379	0.181818	0.245098	555.6	185513	0.0135172	1.22208	1.69769	0.119627	1.30893	0	456.974	25	0	0
1498	3.50309e+06	5.36944e+06	Dußlingen	0	2.1598	2	0.2	0.128205	0	0.090909	919.4	247311	0.0192261	1.22642	1.77338	0.102978	0.989209	1113.25	1527.65	18.0278	0	0
1499	3.51783e+06	5.36912e+06	Pfullingen	0	11.4228	3	0.363636	0.576923	0.285714	0.567568	760.1	1.02441e+06	0.00879794	1.16265	1.70163	0.117938	1.10118	176.139	471.832	157.003	0	0
1500	3.53347e+06	5.38396e+06	Owen	1	11.3079	0	0.133333	0.47619	1	0.354167	633.9	2.05861e+06	0.00932867	1.31243	1.74632	0.117756	1.05	0	270	25	0	0
1501	3.51462e+06	5.36956e+06	Pfullingen	0	17.2117	0	0.363636	0.576923	0.285714	0.567568	774.7	174635	0.0115238	1.16265	1.70163	0.117938	1.10118	830.241	1260.01	74.3303	0	0
1502	3.53983e+06	5.38506e+06	Weilheim an der Teck	0	5.70341	3	0.297297	0.193798	0.230769	0.204545	1114.3	1.55086e+06	0.00669018	1.28113	1.82018	0.108577	1.03917	813.449	568.727	117.686	1	0
1503	3.50271e+06	5.36903e+06	Dußlingen	0	2.5252	2	0.2	0.128205	0	0.090909	543	397964	0.0101867	1.22642	1.77338	0.102978	0.989209	1088.73	1880.66	212.426	0	0
1504	3.50807e+06	5.36908e+06	Gomaringen	0	3.50897	3	0.25	0.196429	0.5	0.155172	1164.5	146664	0.0146182	1.48373	1.85863	0.0970857	1.08571	14.1421	301.538	61.8466	0	0
1505	3.54072e+06	5.39681e+06	Ebersbach an der Fils	0	5.74734	3	0.288136	0.571429	0	0.370787	5009.1	125383	0.0266238	1.1282	1.82888	0.0992791	1.14139	113.137	185.607	113.137	0	0
1506	3.50653e+06	5.36194e+06	Mössingen	0	7.57673	3	0.304348	0.11465	0	0.151316	108246	1.71355e+06	0.0133141	1.60177	2.13591	0.0976952	1.05316	1198.38	470.877	332.415	0	1
1507	3.54706e+06	5.39127e+06	Heiningen	1	14.5721	3	0.185185	0.526316	1	0.348837	1996	6432.17	0.0540683	1.53551	2.04153	0.103488	1.07647	104.403	350.321	134.629	0	0
1508	3.52388e+06	5.38012e+06	Kohlberg	0	5.37863	3	0.25	0.076923	0	0.035714	1689.2	305005	0.0192568	1.33489	1.88101	0.109253	1.40323	514.417	112.805	112.805	0	0
1509	3.51708e+06	5.37767e+06	Reutlingen	0	0.648505	3	0.21978	0.19774	0.205882	0.215686	2528.1	59835.2	0.0260572	1.23563	1.5396	0.120979	1.29265	148.661	178.676	178.676	0	0
1510	3.50338e+06	5.36223e+06	Mössingen	0	4.85389	3	0.304348	0.11465	0	0.151316	774.8	249772	0.0178124	1.60177	2.13591	0.0976952	1.05316	45	333.542	36.0555	0	0
1511	3.53428e+06	5.39154e+06	Kirchheim unter Teck	0	3.75925	3	0.181818	0.241379	0.181818	0.245098	2246.1	189015	0.0181657	1.22208	1.69769	0.119627	1.30893	315.793	494.191	30	0	0
1512	3.53433e+06	5.38227e+06	Lenningen	0	16.0989	3	0.277778	0.221311	0	0.288288	302.2	2.05861e+06	0.00932867	1.09145	1.55231	0.106074	0.965142	20.6155	590.021	49.2443	0	0
1513	3.50853e+06	5.36912e+06	Gomaringen	0	4.2221	0	0.25	0.196429	0.5	0.155172	252.1	359254	0.0105774	1.48373	1.85863	0.0970857	1.08571	120.104	529.079	15.8114	0	0
1514	3.51924e+06	5.37055e+06	Eningen unter Achalm	0	2.81674	3	0.388889	0.6	0.4	0.392857	3356.3	310933	0.0115632	1.29455	1.67437	0.110704	1.02949	92.1954	921.263	22.3607	0	0
1515	3.53404e+06	5.38497e+06	Dettingen unter Teck	0	8.80399	3	0.2	0.049296	0	0.107692	1415.5	2.05861e+06	0.00932867	1.37194	1.76895	0.12934	1.03196	940.811	707.001	315.04	0	0
1516	3.55395e+06	5.39239e+06	Süßen	1	9.65305	3	0.166667	0.428571	0.333333	0.243243	4347.5	29647.5	0.0222651	1.2209	1.69688	0.108562	1.57604	679.577	183.848	183.848	0	0
1517	3.53388e+06	5.38536e+06	Dettingen unter Teck	0	3.45926	2	0.2	0.049296	0	0.107692	1604.6	2.05861e+06	0.00932867	1.37194	1.76895	0.12934	1.03196	591.714	464.462	263.154	0	0
1518	3.53536e+06	5.38535e+06	Bissingen an der Teck	1	7.97409	3	0.333333	0.212766	0.5	0.254237	2927.8	1.06197e+06	0.0117425	1.35031	1.68719	0.114481	0.989418	645.484	795.314	240.416	0	0
1519	3.52056e+06	5.37675e+06	Metzingen	0	5.99224	3	0.2	0.214953	0.428571	0.165138	7081.9	110566	0.0133795	1.18686	1.56641	0.121267	1.33648	263.866	165.303	91.9239	0	0
1520	3.5457e+06	5.39757e+06	Göppingen	0	8.79832	3	0.245902	0.57377	0.315789	0.36875	5268.5	175505	0.0147344	1.02208	1.4472	0.138668	1.15129	42.4264	205.548	53.8516	0	0
1521	3.53417e+06	5.39438e+06	Hochdorf	0	4.67317	3	0.052632	0.307692	1	0.129032	3247.5	195328	0.013884	1.34266	2.08222	0.0941176	1.33333	246.982	571.774	115.434	0	0
1522	3.50611e+06	5.3622e+06	Mössingen	0	20.6054	4	0.304348	0.11465	0	0.151316	5536.4	1.71355e+06	0.0133141	1.60177	2.13591	0.0976952	1.05316	1162.21	614.837	150	0	1
1523	3.53237e+06	5.38663e+06	Dettingen unter Teck	0	5.75405	3	0.2	0.049296	0	0.107692	866.5	1.70997e+06	0.00989906	1.37194	1.76895	0.12934	1.03196	499.65	1263.21	106.066	0	0
1524	3.53365e+06	5.38044e+06	Lenningen	1	6.29815	3	0.277778	0.221311	0	0.288288	764.2	530404	0.0193153	1.09145	1.55231	0.106074	0.965142	268.002	109.659	40	0	0
1525	3.50734e+06	5.3633e+06	Mössingen	0	12.2929	3	0.304348	0.11465	0	0.151316	748.8	402234	0.0211169	1.60177	2.13591	0.0976952	1.05316	564.358	450	116.297	0	1
1526	3.49617e+06	5.36024e+06	Hechingen	0	8.02363	0	0.236842	0.175	0	0.220126	74617.1	26028.1	0.0255488	1.18938	1.61633	0.133193	1.31471	195	387.105	179.025	1	0
1527	3.52572e+06	5.37996e+06	Kohlberg	0	4.37131	3	0.25	0.076923	0	0.035714	1809.7	308893	0.0165857	1.33489	1.88101	0.109253	1.40323	57.0088	167.108	63.6396	0	0
1528	3.54954e+06	5.39001e+06	Eschenbach	0	5.24421	3	0.142857	0.583333	0	0.375	2188.8	55788.9	0.0315802	2.23722	2.98246	0.110795	1.37879	241.506	1095.73	130.863	0	0
1529	3.53256e+06	5.38581e+06	Dettingen unter Teck	0	7.95657	3	0.2	0.049296	0	0.107692	749.2	1.70997e+06	0.00989906	1.37194	1.76895	0.12934	1.03196	497.695	920.462	221.923	0	0
1530	3.53214e+06	5.39104e+06	Kirchheim unter Teck	1	2.89462	0	0.181818	0.241379	0.181818	0.245098	2654.3	6204.19	0.0535316	1.22208	1.69769	0.119627	1.30893	85.44	287.837	287.837	0	0
1531	3.50757e+06	5.36464e+06	Mössingen	0	19.6197	3	0.304348	0.11465	0	0.151316	1231.2	373172	0.0131412	1.60177	2.13591	0.0976952	1.05316	429.942	486.621	197.231	0	0
1532	3.53532e+06	5.38063e+06	Lenningen	0	18.8765	0	0.277778	0.221311	0	0.288288	0	1.54264e+06	0.0133674	1.09145	1.55231	0.106074	0.965142	469.601	922.74	293.471	0	0
1533	3.5379e+06	5.39035e+06	Ohmden	0	5.81826	3	0.5	0.103448	0	0.148148	1540.3	584209	0.0130428	1.41308	2.06513	0.102155	1.23529	418.001	582.001	339.89	0	0
1534	3.52692e+06	5.38758e+06	Nürtingen	1	6.59717	3	0.2	0.22314	0.315789	0.226277	3073.2	560943	0.0180042	1.36016	1.73962	0.12287	1.1157	100	178.676	133.135	0	0
1535	3.50891e+06	5.36823e+06	Gomaringen	0	9.26764	3	0.25	0.196429	0.5	0.155172	1113.7	154578	0.0124705	1.48373	1.85863	0.0970857	1.08571	763.217	186.682	74.3303	0	0
1536	3.54167e+06	5.38738e+06	Weilheim an der Teck	1	14.2999	4	0.297297	0.193798	0.230769	0.204545	4096.7	1.26914e+06	0.00550867	1.28113	1.82018	0.108577	1.03917	777.817	868.332	134.35	0	0
1537	3.53202e+06	5.39182e+06	Kirchheim unter Teck	0	3.6362	3	0.181818	0.241379	0.181818	0.245098	145762	27870.3	0.0288964	1.22208	1.69769	0.119627	1.30893	349.857	290.689	290.689	0	0
1538	3.51877e+06	5.3804e+06	Riederich	0	6.29495	3	0	0	0	0	3746.8	8895.84	0.0438864	1.66874	2.11765	0.101444	1.31193	300.083	35	35	0	0
1539	3.54113e+06	5.38472e+06	Weilheim an der Teck	0	7.15126	3	0.297297	0.193798	0.230769	0.204545	2190.9	416375	0.00954846	1.28113	1.82018	0.108577	1.03917	753.293	541.202	60.208	0	0
1540	3.52074e+06	5.3769e+06	Metzingen	0	5.02129	3	0.2	0.214953	0.428571	0.165138	2422.5	110566	0.0133795	1.18686	1.56641	0.121267	1.33648	140.801	50	29.1548	0	0
1541	3.52863e+06	5.37833e+06	Neuffen	0	7.28534	3	0.333333	0.326531	0.333333	0.222222	2287.8	1.04757e+06	0.0118645	1.28788	1.79529	0.111786	1.13303	744.732	542.033	462.952	0	0
1542	3.53634e+06	5.38372e+06	Bissingen an der Teck	0	9.95315	3	0.333333	0.212766	0.5	0.254237	2698.1	534268	0.0160772	1.35031	1.68719	0.114481	0.989418	255	746.408	65.192	0	1
1543	3.51703e+06	5.37961e+06	Reutlingen	0	12.1739	3	0.21978	0.19774	0.205882	0.215686	880.8	94901.3	0.0332126	1.23563	1.5396	0.120979	1.29265	460.977	115	46.0977	0	0
1544	3.50667e+06	5.36223e+06	Mössingen	0	9.48281	5	0.304348	0.11465	0	0.151316	84166.2	1.71355e+06	0.0133141	1.60177	2.13591	0.0976952	1.05316	1273.5	157.003	40.3113	0	0
1545	3.51871e+06	5.38205e+06	Bempflingen	0	5.82293	2	0.333333	0.363636	1	0.272727	2109.7	269162	0.020936	1.26159	1.79849	0.0983425	1.38889	122.066	117.154	117.154	0	0
1546	3.52421e+06	5.37771e+06	Dettingen an der Erms	0	7.305	3	0.230769	0.166667	1	0.159091	1746.7	2.35355e+06	0.00791344	1.25849	1.75538	0.113123	1.88725	386.943	385.811	252.834	0	0
1547	3.51862e+06	5.37317e+06	Eningen unter Achalm	0	7.30439	3	0.388889	0.6	0.4	0.392857	5955.2	783326	0.0104196	1.29455	1.67437	0.110704	1.02949	359.235	934.679	36.0555	0	0
1548	3.52523e+06	5.37815e+06	Dettingen an der Erms	0	13.7195	3	0.230769	0.166667	1	0.159091	2310.8	2.35355e+06	0.00791344	1.25849	1.75538	0.113123	1.88725	401.155	685.511	414.367	0	0
1549	3.52727e+06	5.38478e+06	Frickenhausen	0	7.32817	3	0.125	0.076923	0.5	0.054054	1572.6	1.08813e+06	0.00929233	1.19047	1.7225	0.103565	1.05882	91.7878	955.536	90.1388	0	0
1550	3.53462e+06	5.38109e+06	Lenningen	0	10.2507	3	0.277778	0.221311	0	0.288288	1163.5	1.54264e+06	0.0133674	1.09145	1.55231	0.106074	0.965142	100.623	567.208	52.2015	0	0
1551	3.5396e+06	5.38617e+06	Weilheim an der Teck	1	6.54992	3	0.297297	0.193798	0.230769	0.204545	591.8	1.55086e+06	0.00669018	1.28113	1.82018	0.108577	1.03917	88.459	286.923	64.0312	0	0
1552	3.50171e+06	5.3665e+06	Ofterdingen	0	2.7071	0	0.363636	0.076923	1	0.142857	0	908719	0.0134922	1.64931	2.09688	0.10547	0.946809	1192.75	1781.47	205.183	0	1
1553	3.5215e+06	5.37403e+06	Metzingen	0	7.97943	3	0.2	0.214953	0.428571	0.165138	1095.6	3112.58	0.110126	1.18686	1.56641	0.121267	1.33648	1228.63	33.541	33.541	0	0
1554	3.52388e+06	5.37778e+06	Dettingen an der Erms	0	9.35609	3	0.230769	0.166667	1	0.159091	2162.6	2.35355e+06	0.00791344	1.25849	1.75538	0.113123	1.88725	622.354	682.367	25.4951	0	0
1555	3.51932e+06	5.37792e+06	Metzingen	0	6.97649	3	0.2	0.214953	0.428571	0.165138	2118.5	761523	0.0136683	1.18686	1.56641	0.121267	1.33648	401.622	132.853	132.853	0	0
1556	3.51173e+06	5.37676e+06	Kirchentellinsfurt	1	10.3245	0	0	0	0	0	610.6	85914.8	0.0256139	1.28644	1.87016	0.107269	1.17308	0	29.1548	29.1548	0	0
1557	3.52838e+06	5.38293e+06	Frickenhausen	1	1.75491	3	0.125	0.076923	0.5	0.054054	118053	239770	0.01344	1.19047	1.7225	0.103565	1.05882	563.227	436.033	22.3607	0	0
1558	3.54187e+06	5.38334e+06	Neidlingen	0	9.89526	3	0.2	0.157143	1	0.114286	1764.2	881477	0.0160684	1.31936	1.78261	0.10745	0.909091	364.589	551.951	82.0061	0	0
1559	3.54904e+06	5.39491e+06	Göppingen	0	24.7041	3	0.245902	0.57377	0.315789	0.36875	5439.2	521299	0.0169237	1.02208	1.4472	0.138668	1.15129	261.199	189.011	116.726	0	0
1560	3.52276e+06	5.38066e+06	Grafenberg	1	11.6679	0	0	0.277778	0	0.235294	859.4	43616.4	0.0228103	1.70392	2.09511	0.0979192	1.56897	0	192.094	18.0278	0	0
1561	3.51089e+06	5.36582e+06	Reutlingen	1	10.8468	0	0.21978	0.19774	0.205882	0.215686	4515.2	483983	0.0103605	1.23563	1.5396	0.120979	1.29265	25	293.471	45	0	0
1562	3.51549e+06	5.37857e+06	Reutlingen	1	8.09025	0	0.21978	0.19774	0.205882	0.215686	568.4	261242	0.0157331	1.23563	1.5396	0.120979	1.29265	0	288.877	18.0278	0	0
1563	3.53377e+06	5.38089e+06	Lenningen	1	10.0458	3	0.277778	0.221311	0	0.288288	43641	530404	0.0193153	1.09145	1.55231	0.106074	0.965142	0	166.433	14.1421	0	0
1564	3.54573e+06	5.38893e+06	Boll	0	9.24807	3	0.285714	2.5	1	0.538462	2347.5	14623.3	0.0390161	1.35042	1.91502	0.160651	1.21591	11.1803	320.663	85	0	0
1565	3.53875e+06	5.39484e+06	Ebersbach an der Fils	0	10.0149	0	0.288136	0.571429	0	0.370787	1121.5	160757	0.0210849	1.1282	1.82888	0.0992791	1.14139	1303.01	673.071	10	0	0
1566	3.53246e+06	5.39292e+06	Notzingen	0	11.1529	3	0.2	0.16	0	0.181818	1770.1	227464	0.0161938	1.58633	2.37363	0.106287	1.20792	712.074	410.761	410.761	0	0
1567	3.52705e+06	5.3809e+06	Neuffen	0	7.97029	3	0.333333	0.326531	0.333333	0.222222	1262.3	1.20814e+06	0.013945	1.28788	1.79529	0.111786	1.13303	154.434	740	126.194	0	0
1568	3.51416e+06	5.37856e+06	Reutlingen	1	5.36225	2	0.21978	0.19774	0.205882	0.215686	2400.7	75411.3	0.0267892	1.23563	1.5396	0.120979	1.29265	77.6209	650.884	115.109	0	0
1569	3.50188e+06	5.36377e+06	Ofterdingen	0	11.486	3	0.363636	0.076923	1	0.142857	761.8	63683.6	0.0262974	1.64931	2.09688	0.10547	0.946809	365	382.753	291.204	0	0
1570	3.53992e+06	5.38315e+06	Weilheim an der Teck	0	18.1578	3	0.297297	0.193798	0.230769	0.204545	10264.8	1.48249e+06	0.00924149	1.28113	1.82018	0.108577	1.03917	297.027	20.6155	20.6155	0	0
1571	3.52944e+06	5.38227e+06	Beuren	0	11.7676	3	0.076923	0.333333	0.333333	0.195652	928.9	333570	0.0172854	1.14684	1.5569	0.11726	1.02703	394.62	486.544	167.705	0	0
1572	3.51537e+06	5.37847e+06	Reutlingen	1	6.48387	0	0.21978	0.19774	0.205882	0.215686	3567.5	261242	0.0157331	1.23563	1.5396	0.120979	1.29265	0	228.09	0	0	0
1573	3.53926e+06	5.38474e+06	Weilheim an der Teck	0	9.13521	3	0.297297	0.193798	0.230769	0.204545	1503.3	1.55086e+06	0.00669018	1.28113	1.82018	0.108577	1.03917	989.76	1182.39	33.541	1	0
1574	3.54559e+06	5.39758e+06	Göppingen	1	6.43209	3	0.245902	0.57377	0.315789	0.36875	8442.5	175505	0.0147344	1.02208	1.4472	0.138668	1.15129	83.8153	281.469	119.269	0	0
1575	3.52238e+06	5.38316e+06	Großbettlingen	1	19.6595	3	0.333333	0.222222	0	0.25	2901.7	109525	0.0177061	1.73035	2.47265	0.0858525	1.60976	200	455.33	36.0555	0	0
1576	3.52523e+06	5.37959e+06	Kohlberg	0	14.4178	0	0.25	0.076923	0	0.035714	0	308893	0.0165857	1.33489	1.88101	0.109253	1.40323	250.45	563.649	255.392	0	0
1577	3.50966e+06	5.37418e+06	Kusterdingen	0	5.86014	2	0.259259	0.168675	1	0.153226	812.3	10651.5	0.0413859	1.39645	1.80254	0.10766	1.5061	113.137	449.055	49.2443	0	0
1578	3.52678e+06	5.37808e+06	Dettingen an der Erms	0	7.45344	0	0.230769	0.166667	1	0.159091	0	829066	0.00919869	1.25849	1.75538	0.113123	1.88725	726.911	1762.12	179.234	0	0
1579	3.51531e+06	5.37776e+06	Reutlingen	1	1.23696	2	0.21978	0.19774	0.205882	0.215686	1357.5	6167.42	0.0650211	1.23563	1.5396	0.120979	1.29265	215.232	290.259	166.208	0	0
1580	3.52505e+06	5.38229e+06	Frickenhausen	0	15.7151	3	0.125	0.076923	0.5	0.054054	1646.7	40833.7	0.0288378	1.19047	1.7225	0.103565	1.05882	140.89	266.271	90.1388	0	0
1581	3.52741e+06	5.38316e+06	Frickenhausen	1	9.02266	0	0.125	0.076923	0.5	0.054054	258.9	1.08813e+06	0.00929233	1.19047	1.7225	0.103565	1.05882	0	347.851	14.1421	0	0
1582	3.52687e+06	5.3828e+06	Frickenhausen	0	12.047	3	0.125	0.076923	0.5	0.054054	748.2	1.34387e+06	0.00860131	1.19047	1.7225	0.103565	1.05882	125.897	277.354	18.0278	0	0
1583	3.53282e+06	5.39154e+06	Kirchheim unter Teck	0	4.22913	3	0.181818	0.241379	0.181818	0.245098	2420.5	17162.7	0.031579	1.22208	1.69769	0.119627	1.30893	40.3113	197.99	15	0	0
1584	3.53231e+06	5.39163e+06	Kirchheim unter Teck	0	20.4998	3	0.181818	0.241379	0.181818	0.245098	2294.7	304064	0.0173842	1.22208	1.69769	0.119627	1.30893	200.811	121.758	121.758	0	0
1585	3.52661e+06	5.38255e+06	Frickenhausen	0	13.0549	3	0.125	0.076923	0.5	0.054054	383.9	1.34387e+06	0.00860131	1.19047	1.7225	0.103565	1.05882	365.411	630.971	57.0088	0	0
1586	3.52794e+06	5.37832e+06	Neuffen	0	4.90124	0	0.333333	0.326531	0.333333	0.222222	19121.6	1.04757e+06	0.0118645	1.28788	1.79529	0.111786	1.13303	675.666	940.479	0	0	0
1587	3.52715e+06	5.38769e+06	Nürtingen	0	7.27964	3	0.2	0.22314	0.315789	0.226277	1285.9	560943	0.0180042	1.36016	1.73962	0.12287	1.1157	141.156	100.125	100.125	0	0
1588	3.54084e+06	5.38728e+06	Weilheim an der Teck	1	0.972518	0	0.297297	0.193798	0.230769	0.204545	2131.6	1.26914e+06	0.00550867	1.28113	1.82018	0.108577	1.03917	0	599.27	15.8114	0	0
1589	3.50553e+06	5.36403e+06	Mössingen	0	15.0925	4	0.304348	0.11465	0	0.151316	22855	115506	0.0151859	1.60177	2.13591	0.0976952	1.05316	40	5	5	0	0
1590	3.51598e+06	5.36973e+06	Pfullingen	0	10.6082	0	0.363636	0.576923	0.285714	0.567568	1063.9	898104	0.00809342	1.16265	1.70163	0.117938	1.10118	41.2311	442.634	40.3113	0	0
1591	3.53427e+06	5.39101e+06	Kirchheim unter Teck	1	16.6178	3	0.181818	0.241379	0.181818	0.245098	14772.2	285161	0.00989804	1.22208	1.69769	0.119627	1.30893	55	91.9239	55.2268	0	0
1592	3.53257e+06	5.38249e+06	Owen	0	10.4357	3	0.133333	0.47619	1	0.354167	1161.4	1.39443e+06	0.0107842	1.31243	1.74632	0.117756	1.05	507.568	555	14.1421	0	0
1593	3.54092e+06	5.38535e+06	Weilheim an der Teck	0	7.45128	3	0.297297	0.193798	0.230769	0.204545	1630.4	416375	0.00954846	1.28113	1.82018	0.108577	1.03917	804.316	462.871	304.138	0	0
1594	3.5354e+06	5.38077e+06	Lenningen	0	17.0456	0	0.277778	0.221311	0	0.288288	0	1.54264e+06	0.0133674	1.09145	1.55231	0.106074	0.965142	496.488	1047.85	268.794	0	0
1595	3.51865e+06	5.37078e+06	Eningen unter Achalm	0	6.10167	3	0.388889	0.6	0.4	0.392857	891.6	310933	0.0115632	1.29455	1.67437	0.110704	1.02949	148.071	462.871	179.513	0	0
1596	3.54805e+06	5.3981e+06	Göppingen	1	15.194	3	0.245902	0.57377	0.315789	0.36875	6293.7	50192.7	0.0372932	1.02208	1.4472	0.138668	1.15129	35	129.035	43.0116	0	0
1597	3.52296e+06	5.37834e+06	Metzingen	0	13.7248	3	0.2	0.214953	0.428571	0.165138	1064	2.35355e+06	0.00791344	1.18686	1.56641	0.121267	1.33648	696.563	430.813	270.601	0	0
1598	3.55685e+06	5.39148e+06	Gingen an der Fils	0	12.995	3	0.25	0.588235	0	0.535714	3459	544352	0.0179697	1.1043	1.56275	0.127738	1.25	359.201	353.836	353.836	0	0
1599	3.51684e+06	5.36846e+06	Pfullingen	0	12.3988	4	0.363636	0.576923	0.285714	0.567568	545.5	298858	0.0111596	1.16265	1.70163	0.117938	1.10118	32.0156	294.109	188.282	0	0
1600	3.51995e+06	5.37309e+06	Eningen unter Achalm	0	6.1879	3	0.388889	0.6	0.4	0.392857	1682.8	327921	0.0123519	1.29455	1.67437	0.110704	1.02949	327.605	297.069	5	0	0
1601	3.53402e+06	5.38534e+06	Dettingen unter Teck	0	11.6928	3	0.2	0.049296	0	0.107692	602.5	2.05861e+06	0.00932867	1.37194	1.76895	0.12934	1.03196	698.015	599.083	141.156	0	0
1602	3.54493e+06	5.38869e+06	Boll	0	2.98968	3	0.285714	2.5	1	0.538462	1661.1	6056.41	0.0569982	1.35042	1.91502	0.160651	1.21591	85.44	301.538	85	0	0
1603	3.54224e+06	5.39406e+06	Albershausen	1	16.3116	3	0.214286	0.6	1	0.375	1769.1	5141.6	0.0547926	1.36751	1.81129	0.104651	1.18939	395.38	398.026	195.256	0	0
1604	3.53571e+06	5.38369e+06	Bissingen an der Teck	0	6.58275	3	0.333333	0.212766	0.5	0.254237	6484.1	1.06197e+06	0.0117425	1.35031	1.68719	0.114481	0.989418	476.707	1272.96	236.907	0	1
1605	3.53285e+06	5.39142e+06	Kirchheim unter Teck	1	2.42708	0	0.181818	0.241379	0.181818	0.245098	9262.4	124195	0.0141063	1.22208	1.69769	0.119627	1.30893	0	145.344	0	0	0
1606	3.5019e+06	5.36631e+06	Ofterdingen	0	1.44146	3	0.363636	0.076923	1	0.142857	1441.1	908719	0.0134922	1.64931	2.09688	0.10547	0.946809	939.415	1555.41	18.0278	0	0
1607	3.51418e+06	5.36829e+06	Pfullingen	0	8.71375	0	0.363636	0.576923	0.285714	0.567568	1012	20815.5	0.0334328	1.16265	1.70163	0.117938	1.10118	1247.34	268.701	199.06	0	0
1608	3.53212e+06	5.39159e+06	Kirchheim unter Teck	0	28.7158	3	0.181818	0.241379	0.181818	0.245098	3619.4	304064	0.0173842	1.22208	1.69769	0.119627	1.30893	288.617	295.677	295.677	0	0
1609	3.51428e+06	5.37416e+06	Reutlingen	1	11.3294	0	0.21978	0.19774	0.205882	0.215686	421.5	67453	0.0276775	1.23563	1.5396	0.120979	1.29265	0	298.077	10	0	0
1610	3.54086e+06	5.38397e+06	Weilheim an der Teck	0	10.617	3	0.297297	0.193798	0.230769	0.204545	1145.8	881477	0.0160684	1.28113	1.82018	0.108577	1.03917	702.086	169.189	169.189	0	0
1611	3.53931e+06	5.38296e+06	Weilheim an der Teck	0	8.43072	0	0.297297	0.193798	0.230769	0.204545	12606	1.48249e+06	0.00924149	1.28113	1.82018	0.108577	1.03917	148.661	216.91	145	0	0
1612	3.51769e+06	5.36899e+06	Pfullingen	0	4.39343	3	0.363636	0.576923	0.285714	0.567568	829.3	1.02441e+06	0.00879794	1.16265	1.70163	0.117938	1.10118	147.648	295.169	145.774	0	0
1613	3.549e+06	5.39388e+06	Heiningen	0	0.644725	3	0.185185	0.526316	1	0.348837	2129.3	24573.3	0.0393048	1.53551	2.04153	0.103488	1.07647	689.511	60	60	0	0
1614	3.5289e+06	5.38261e+06	Beuren	0	2.62829	3	0.076923	0.333333	0.333333	0.195652	1838.1	333570	0.0172854	1.14684	1.5569	0.11726	1.02703	533.385	300.541	295.169	0	0
1615	3.54578e+06	5.39774e+06	Göppingen	0	5.74899	3	0.245902	0.57377	0.315789	0.36875	5730.6	175505	0.0147344	1.02208	1.4472	0.138668	1.15129	76.1577	196.787	100.623	0	0
1616	3.54095e+06	5.38717e+06	Weilheim an der Teck	1	9.29369	3	0.297297	0.193798	0.230769	0.204545	259280	1.26914e+06	0.00550867	1.28113	1.82018	0.108577	1.03917	92.1954	743.808	100.623	0	0
1617	3.53849e+06	5.38932e+06	Ohmden	0	10.6787	3	0.5	0.103448	0	0.148148	1957.8	464865	0.0102856	1.41308	2.06513	0.102155	1.23529	263.866	372.156	372.156	0	0
1618	3.51757e+06	5.37785e+06	Reutlingen	0	2.19842	2	0.21978	0.19774	0.205882	0.215686	1107.3	69868.8	0.0329417	1.23563	1.5396	0.120979	1.29265	268.002	322.568	21.2132	0	0
1619	3.5378e+06	5.39681e+06	Ebersbach an der Fils	0	2.39281	3	0.288136	0.571429	0	0.370787	1811.1	1907.63	0.0934116	1.1282	1.82888	0.0992791	1.14139	130.384	126.194	126.194	0	0
1620	3.5156e+06	5.36708e+06	Pfullingen	0	4.74959	3	0.363636	0.576923	0.285714	0.567568	214.2	520492	0.0100736	1.16265	1.70163	0.117938	1.10118	673.071	275.545	115.434	0	0
1621	3.52555e+06	5.37903e+06	Neuffen	1	9.77607	0	0.333333	0.326531	0.333333	0.222222	0	17257.3	0.0337281	1.28788	1.79529	0.111786	1.13303	801.639	1087.84	409.207	0	0
1622	3.51086e+06	5.36683e+06	Reutlingen	0	12.4506	0	0.21978	0.19774	0.205882	0.215686	444.9	408466	0.0191366	1.23563	1.5396	0.120979	1.29265	0	60.208	7.07107	0	0
1623	3.53404e+06	5.38249e+06	Lenningen	0	1.44654	3	0.277778	0.221311	0	0.288288	91.1	2.05861e+06	0.00932867	1.09145	1.55231	0.106074	0.965142	210.297	406.971	227.266	0	0
1624	3.52549e+06	5.38579e+06	Nürtingen	1	13.0722	3	0.2	0.22314	0.315789	0.226277	1325.7	76809.1	0.0229895	1.36016	1.73962	0.12287	1.1157	47.4342	373.363	47.4342	0	0
1625	3.55707e+06	5.39153e+06	Gingen an der Fils	0	1.37857	2	0.25	0.588235	0	0.535714	1596.1	544352	0.0179697	1.1043	1.56275	0.127738	1.25	128.16	197.041	145.774	0	0
1626	3.54104e+06	5.38709e+06	Weilheim an der Teck	0	9.39153	3	0.297297	0.193798	0.230769	0.204545	259280	1.26914e+06	0.00550867	1.28113	1.82018	0.108577	1.03917	215.697	859.491	148.492	0	0
1627	3.53541e+06	5.38086e+06	Lenningen	0	12.734	0	0.277778	0.221311	0	0.288288	0	1.54264e+06	0.0133674	1.09145	1.55231	0.106074	0.965142	475.184	1070.85	216.91	0	0
1628	3.51755e+06	5.3757e+06	Reutlingen	0	8.29371	3	0.21978	0.19774	0.205882	0.215686	2175.2	99088	0.0182547	1.23563	1.5396	0.120979	1.29265	88.6002	545.183	77.7817	0	0
1629	3.52253e+06	5.37595e+06	Metzingen	0	9.36055	2	0.2	0.214953	0.428571	0.165138	1104	198916	0.0294673	1.18686	1.56641	0.121267	1.33648	260	255	126.491	0	0
1630	3.52718e+06	5.38047e+06	Neuffen	0	12.7356	3	0.333333	0.326531	0.333333	0.222222	1352.9	1.20814e+06	0.013945	1.28788	1.79529	0.111786	1.13303	96.0469	558.144	131.244	0	0
1631	3.54924e+06	5.39462e+06	Göppingen	0	8.39535	3	0.245902	0.57377	0.315789	0.36875	3135.4	521299	0.0169237	1.02208	1.4472	0.138668	1.15129	263.866	132.004	80.7775	0	0
1632	3.53821e+06	5.39053e+06	Ohmden	0	2.7249	2	0.5	0.103448	0	0.148148	3483.7	584209	0.0130428	1.41308	2.06513	0.102155	1.23529	453.982	633.877	130	0	0
1633	3.51144e+06	5.36647e+06	Reutlingen	0	16.9736	3	0.21978	0.19774	0.205882	0.215686	3649.4	286101	0.0129011	1.23563	1.5396	0.120979	1.29265	114.018	345.905	107.703	0	0
1634	3.53205e+06	5.39199e+06	Kirchheim unter Teck	1	7.52298	3	0.181818	0.241379	0.181818	0.245098	145762	176278	0.0145955	1.22208	1.69769	0.119627	1.30893	503.612	167.108	167.108	0	0
1635	3.5068e+06	5.36175e+06	Mössingen	0	4.99058	4	0.304348	0.11465	0	0.151316	7132.6	1.71355e+06	0.0133141	1.60177	2.13591	0.0976952	1.05316	861.815	458.394	262.488	0	1
1636	3.49738e+06	5.36165e+06	Bodelshausen	0	11.5674	3	0.5	0.037037	0	0.25	267.9	38114.9	0.0473618	1.62158	2.06108	0.103155	1.18996	46.0977	698.516	105.119	0	0
1637	3.52449e+06	5.37625e+06	Dettingen an der Erms	0	5.53677	3	0.230769	0.166667	1	0.159091	918	1.10291e+06	0.0123476	1.25849	1.75538	0.113123	1.88725	512.445	370	107.355	0	0
1638	3.54825e+06	5.38862e+06	Gammelshausen	0	12.9405	3	0.25	0.5	0	0.4375	1392.9	64294.2	0.0254702	2.12843	2.98473	0.0807799	1.33333	226.385	10	10	0	0
1639	3.52085e+06	5.38199e+06	Bempflingen	0	12.1718	3	0.333333	0.363636	1	0.272727	479.4	206858	0.0177282	1.26159	1.79849	0.0983425	1.38889	418.24	510.392	121.037	0	0
1640	3.49629e+06	5.36141e+06	Bodelshausen	1	1.8026	3	0.5	0.037037	0	0.25	959.5	15132.4	0.0404551	1.62158	2.06108	0.103155	1.18996	389.647	590.593	203.961	0	0
1641	3.53456e+06	5.38987e+06	Kirchheim unter Teck	0	13.8512	4	0.181818	0.241379	0.181818	0.245098	1919.9	394274	0.0145663	1.22208	1.69769	0.119627	1.30893	131.244	223.607	70.7107	0	0
1642	3.52041e+06	5.38081e+06	Riederich	0	3.66827	3	0	0	0	0	1658	257751	0.0186256	1.66874	2.11765	0.101444	1.31193	337.343	603.075	111.803	0	0
1643	3.54079e+06	5.38411e+06	Weilheim an der Teck	0	11.5595	3	0.297297	0.193798	0.230769	0.204545	2030.5	881477	0.0160684	1.28113	1.82018	0.108577	1.03917	775	120	120	0	0
1644	3.52571e+06	5.37817e+06	Dettingen an der Erms	0	14.5555	3	0.230769	0.166667	1	0.159091	1442.8	19456.9	0.0292702	1.25849	1.75538	0.113123	1.88725	543.53	1152.93	183.576	0	0
1645	3.51956e+06	5.37122e+06	Eningen unter Achalm	0	7.46826	3	0.388889	0.6	0.4	0.392857	3096.3	538420	0.0157695	1.29455	1.67437	0.110704	1.02949	340.037	766.942	30	0	0
1646	3.51727e+06	5.37519e+06	Reutlingen	1	22.8185	0	0.21978	0.19774	0.205882	0.215686	258.9	39781.9	0.0342257	1.23563	1.5396	0.120979	1.29265	0	374.733	20	0	0
1647	3.50539e+06	5.36216e+06	Mössingen	0	10.9576	3	0.304348	0.11465	0	0.151316	16424.7	1.71355e+06	0.0133141	1.60177	2.13591	0.0976952	1.05316	661.154	1205.59	255	0	1
1648	3.53944e+06	5.38561e+06	Weilheim an der Teck	0	9.87721	3	0.297297	0.193798	0.230769	0.204545	462.6	1.55086e+06	0.00669018	1.28113	1.82018	0.108577	1.03917	456.755	759.951	138.924	1	0
1649	3.54487e+06	5.39147e+06	Göppingen	0	3.28552	3	0.245902	0.57377	0.315789	0.36875	2873.1	104532	0.0198476	1.02208	1.4472	0.138668	1.15129	460.977	460	102.956	0	0
1650	3.52894e+06	5.38994e+06	Kirchheim unter Teck	0	17.4903	3	0.181818	0.241379	0.181818	0.245098	232172	26683.8	0.0367963	1.22208	1.69769	0.119627	1.30893	988.041	824.212	403.02	0	0
1651	3.53537e+06	5.3808e+06	Lenningen	0	12.6353	0	0.277778	0.221311	0	0.288288	0	1.54264e+06	0.0133674	1.09145	1.55231	0.106074	0.965142	458.803	1025.93	226.385	0	0
1652	3.5432e+06	5.3947e+06	Uhingen	0	1.70804	2	0.380952	0.264706	0.8	0.318841	7296.7	2938.62	0.103032	1.16457	1.74023	0.104612	1.14191	58.5235	223.607	55	0	0
1653	3.54102e+06	5.38534e+06	Weilheim an der Teck	0	5.93649	3	0.297297	0.193798	0.230769	0.204545	3583.3	416375	0.00954846	1.28113	1.82018	0.108577	1.03917	896.005	423.468	227.431	0	0
1654	3.50233e+06	5.36753e+06	Dußlingen	0	1.94487	2	0.2	0.128205	0	0.090909	772.1	444598	0.020699	1.22642	1.77338	0.102978	0.989209	1351.48	2010.6	485.927	0	0
1655	3.52069e+06	5.37931e+06	Metzingen	0	5.48273	3	0.2	0.214953	0.428571	0.165138	1749	139839	0.0121983	1.18686	1.56641	0.121267	1.33648	229.401	565.089	190.066	0	0
1656	3.53149e+06	5.38921e+06	Kirchheim unter Teck	1	2.73655	2	0.181818	0.241379	0.181818	0.245098	3028.7	59974.4	0.0285757	1.22208	1.69769	0.119627	1.30893	417.642	26.9258	26.9258	0	0
1657	3.53949e+06	5.38591e+06	Weilheim an der Teck	0	8.35217	3	0.297297	0.193798	0.230769	0.204545	543.2	1.55086e+06	0.00669018	1.28113	1.82018	0.108577	1.03917	258.118	502.121	215.232	1	0
1658	3.52171e+06	5.37624e+06	Metzingen	0	6.02609	3	0.2	0.214953	0.428571	0.165138	398	505116	0.00726691	1.18686	1.56641	0.121267	1.33648	780.417	565.73	120.416	0	0
1659	3.54687e+06	5.38892e+06	Dürnau	0	3.93059	3	0.461538	0.545455	1	0.5	1534.5	143286	0.0161771	1.42809	2.06038	0.0877763	1.47761	121.655	485	22.3607	0	0
1660	3.52698e+06	5.37913e+06	Neuffen	0	7.5368	3	0.333333	0.326531	0.333333	0.222222	12893.4	674506	0.0153244	1.28788	1.79529	0.111786	1.13303	420.268	717.809	146.031	0	0
1661	3.54485e+06	5.3933e+06	Göppingen	0	7.04971	3	0.245902	0.57377	0.315789	0.36875	3889.3	79250.9	0.0289899	1.02208	1.4472	0.138668	1.15129	163.478	468.108	76.1577	0	0
1662	3.53848e+06	5.3844e+06	Bissingen an der Teck	0	2.22629	3	0.333333	0.212766	0.5	0.254237	4288.5	210695	0.0113736	1.35031	1.68719	0.114481	0.989418	1091.08	1202.66	14.1421	0	1
1663	3.54533e+06	5.39772e+06	Göppingen	0	3.25478	3	0.245902	0.57377	0.315789	0.36875	1999.9	175505	0.0147344	1.02208	1.4472	0.138668	1.15129	99.6243	160	120.934	0	0
1664	3.51617e+06	5.37683e+06	Reutlingen	0	6.35219	3	0.21978	0.19774	0.205882	0.215686	937.5	111588	0.0198436	1.23563	1.5396	0.120979	1.29265	113.137	439.318	7.07107	0	0
1665	3.5391e+06	5.3884e+06	Holzmaden	0	4.31764	3	1	0.166667	0	0.235294	1661	95363	0.0173961	1.40334	1.87306	0.117076	1.13889	295.677	161.4	171.026	0	0
1666	3.55701e+06	5.39004e+06	Gingen an der Fils	0	10.0899	3	0.25	0.588235	0	0.535714	1633.3	7045.34	0.0519472	1.1043	1.56275	0.127738	1.25	997.296	776.611	290.904	0	0
1667	3.50882e+06	5.37413e+06	Kusterdingen	0	1.92762	2	0.259259	0.168675	1	0.153226	1318.6	6459.33	0.066178	1.39645	1.80254	0.10766	1.5061	432.464	40.3113	25	0	0
1668	3.5348e+06	5.38681e+06	Dettingen unter Teck	0	12.743	3	0.2	0.049296	0	0.107692	1481	68125	0.0271394	1.37194	1.76895	0.12934	1.03196	301.04	94.8683	94.8683	0	0
1669	3.54075e+06	5.38287e+06	Neidlingen	0	6.83795	3	0.2	0.157143	1	0.114286	22222.1	1.48249e+06	0.00924149	1.31936	1.78261	0.10745	0.909091	418.001	597.516	259.422	0	0
1670	3.52003e+06	5.38208e+06	Bempflingen	1	20.0992	0	0.333333	0.363636	1	0.272727	610.2	319527	0.0177893	1.26159	1.79849	0.0983425	1.38889	0	60.208	26.9258	0	0
1671	3.50538e+06	5.36227e+06	Mössingen	0	12.0923	3	0.304348	0.11465	0	0.151316	17336.7	1.71355e+06	0.0133141	1.60177	2.13591	0.0976952	1.05316	566.127	1139.32	169.706	0	1
1672	3.51248e+06	5.37438e+06	Reutlingen	1	1.75251	3	0.21978	0.19774	0.205882	0.215686	16487.9	37174.7	0.0331226	1.23563	1.5396	0.120979	1.29265	276.812	275.772	275.772	0	0
1673	3.53494e+06	5.39005e+06	Kirchheim unter Teck	0	13.67	4	0.181818	0.241379	0.181818	0.245098	1751.9	394274	0.0145663	1.22208	1.69769	0.119627	1.30893	40.3113	567.208	74.3303	0	0
1674	3.54368e+06	5.38827e+06	Boll	0	11.1575	3	0.285714	2.5	1	0.538462	3640.2	111335	0.0227611	1.35042	1.91502	0.160651	1.21591	77.6209	945.053	100	0	0
1675	3.52524e+06	5.37626e+06	Dettingen an der Erms	0	11.9986	3	0.230769	0.166667	1	0.159091	296928	1.10291e+06	0.0123476	1.25849	1.75538	0.113123	1.88725	432.897	213.6	132.004	0	0
1676	3.51314e+06	5.37203e+06	Reutlingen	0	6.72903	3	0.21978	0.19774	0.205882	0.215686	880.4	597842	0.0117804	1.23563	1.5396	0.120979	1.29265	226.771	817.083	53.1507	0	0
1677	3.55929e+06	5.38782e+06	Geislingen an der Steige	0	3.39643	3	0.252174	0.616667	0.25	0.360248	2748.7	1.18824e+06	0.0115027	0.886321	1.27693	0.136996	1.04238	607.557	728.972	80	0	0
1678	3.50552e+06	5.36493e+06	Nehren	0	5.99072	3	0	0	0	0	969.9	1.29779e+06	0.0060432	1.69551	2.29424	0.103814	1.45652	458.039	530.495	91.7878	0	0
1679	3.54207e+06	5.38234e+06	Neidlingen	0	5.70501	3	0.2	0.157143	1	0.114286	2329	124359	0.0160526	1.31936	1.78261	0.10745	0.909091	82.4621	103.078	93.0054	0	0
1680	3.52475e+06	5.37664e+06	Dettingen an der Erms	0	7.84017	0	0.230769	0.166667	1	0.159091	8267.6	1.10291e+06	0.0123476	1.25849	1.75538	0.113123	1.88725	95	44.7214	44.7214	0	0
1681	3.53367e+06	5.38403e+06	Owen	0	11.6041	3	0.133333	0.47619	1	0.354167	384	2.05861e+06	0.00932867	1.31243	1.74632	0.117756	1.05	106.888	415.12	109.202	0	0
1682	3.53896e+06	5.38358e+06	Weilheim an der Teck	0	20.1767	4	0.297297	0.193798	0.230769	0.204545	1128	1.48249e+06	0.00924149	1.28113	1.82018	0.108577	1.03917	317.53	661.532	221.02	0	0
1683	3.51394e+06	5.37257e+06	Reutlingen	0	6.80323	3	0.21978	0.19774	0.205882	0.215686	18697.3	597842	0.0117804	1.23563	1.5396	0.120979	1.29265	75	142.127	111.018	0	0
1684	3.53725e+06	5.38409e+06	Bissingen an der Teck	1	4.76438	3	0.333333	0.212766	0.5	0.254237	5230.9	7272.6	0.0594393	1.35031	1.68719	0.114481	0.989418	566.083	15	15	0	1
1685	3.52837e+06	5.37881e+06	Neuffen	0	3.90314	3	0.333333	0.326531	0.333333	0.222222	1834	1.04757e+06	0.0118645	1.28788	1.79529	0.111786	1.13303	199.06	290	217.083	0	0
1686	3.5274e+06	5.38463e+06	Nürtingen	1	12.6427	3	0.2	0.22314	0.315789	0.226277	11350	1.08813e+06	0.00929233	1.36016	1.73962	0.12287	1.1157	182.003	937.243	93.9415	0	0
1687	3.53243e+06	5.39298e+06	Notzingen	0	7.53536	3	0.2	0.16	0	0.181818	1402.1	227464	0.0161938	1.58633	2.37363	0.106287	1.20792	761.003	473.814	460	0	0
1688	3.54156e+06	5.38797e+06	Weilheim an der Teck	1	4.57714	3	0.297297	0.193798	0.230769	0.204545	1749.4	1.26914e+06	0.00550867	1.28113	1.82018	0.108577	1.03917	673.832	427.376	436.606	0	0
1689	3.54659e+06	5.39242e+06	Heiningen	1	5.02594	3	0.185185	0.526316	1	0.348837	11621.3	68604.6	0.0265605	1.53551	2.04153	0.103488	1.07647	644.845	503.835	102.591	0	0
1690	3.52053e+06	5.38031e+06	Riederich	0	5.45959	3	0	0	0	0	1586.2	121466	0.0129091	1.66874	2.11765	0.101444	1.31193	255.441	567.671	100	0	0
1691	3.53208e+06	5.38894e+06	Kirchheim unter Teck	0	3.62425	2	0.181818	0.241379	0.181818	0.245098	2611.6	94662	0.0143568	1.22208	1.69769	0.119627	1.30893	270.74	173.277	178.885	0	0
1692	3.51949e+06	5.38466e+06	Neckartailfingen	0	0	0	0	0.210526	1	0.12	0	22169.6	0.030518	1.37146	1.88828	0.0926641	1.25	679.007	710.862	710.862	0	0
1693	3.53398e+06	5.38493e+06	Dettingen unter Teck	0	5.93173	3	0.2	0.049296	0	0.107692	1838.8	2.05861e+06	0.00932867	1.37194	1.76895	0.12934	1.03196	881.192	656.22	384.187	0	0
1694	3.50432e+06	5.36152e+06	Mössingen	0	14.1235	4	0.304348	0.11465	0	0.151316	41012.1	1.71355e+06	0.0133141	1.60177	2.13591	0.0976952	1.05316	744.614	1444.75	11.1803	0	1
1695	3.51791e+06	5.37333e+06	Reutlingen	1	13.757	4	0.21978	0.19774	0.205882	0.215686	21417	851648	0.00670136	1.23563	1.5396	0.120979	1.29265	669.403	457.739	7.07107	0	0
1696	3.54981e+06	5.39216e+06	Heiningen	1	1.30635	3	0.185185	0.526316	1	0.348837	97031	103814	0.0160486	1.53551	2.04153	0.103488	1.07647	169.189	165.529	165.529	0	0
1697	3.53197e+06	5.38342e+06	Owen	0	0.572427	3	0.133333	0.47619	1	0.354167	3412.3	1.39443e+06	0.0107842	1.31243	1.74632	0.117756	1.05	904.434	511.713	65	0	0
1698	3.51657e+06	5.36848e+06	Pfullingen	1	0.423101	3	0.363636	0.576923	0.285714	0.567568	78337.6	298858	0.0111596	1.16265	1.70163	0.117938	1.10118	0	370.304	65.7647	0	0
1699	3.53348e+06	5.39208e+06	Notzingen	0	7.49535	3	0.2	0.16	0	0.181818	2640	95728.5	0.0333639	1.58633	2.37363	0.106287	1.20792	275.409	325.576	213.6	0	0
1700	3.5434e+06	5.39414e+06	Uhingen	0	1.25056	3	0.380952	0.264706	0.8	0.318841	3367.5	29360.8	0.0240613	1.16457	1.74023	0.104612	1.14191	166.208	296.985	116.619	0	0
1701	3.51026e+06	5.37166e+06	Reutlingen	0	4.68227	3	0.21978	0.19774	0.205882	0.215686	2183.5	774234	0.0129779	1.23563	1.5396	0.120979	1.29265	125	283.019	121.037	0	0
1702	3.52947e+06	5.39179e+06	Wendlingen am Neckar	1	5.71432	0	0.357143	0.071429	0.333333	0.375	122009	403361	0.00978381	1.17744	1.7408	0.0861055	1.28011	297.532	295.169	70.1783	0	0
1703	3.54701e+06	5.39418e+06	Göppingen	0	12.1182	3	0.245902	0.57377	0.315789	0.36875	3794.7	261917	0.0182301	1.02208	1.4472	0.138668	1.15129	112.361	369.628	50.9902	0	0
1704	3.51869e+06	5.37312e+06	Eningen unter Achalm	0	9.40696	3	0.388889	0.6	0.4	0.392857	3170.8	783326	0.0104196	1.29455	1.67437	0.110704	1.02949	281.514	858.793	50	0	0
1705	3.52574e+06	5.38096e+06	Neuffen	0	6.21957	3	0.333333	0.326531	0.333333	0.222222	1795.7	1.20814e+06	0.013945	1.28788	1.79529	0.111786	1.13303	484.381	728.011	200.125	0	0
1706	3.50698e+06	5.3715e+06	Kusterdingen	0	3.36298	2	0.259259	0.168675	1	0.153226	989.3	141558	0.0186832	1.39645	1.80254	0.10766	1.5061	360.035	571.402	136.015	0	0
1707	3.51256e+06	5.37374e+06	Reutlingen	1	3.38434	0	0.21978	0.19774	0.205882	0.215686	8690.7	115045	0.0187089	1.23563	1.5396	0.120979	1.29265	20.6155	158.824	120.208	0	0
1708	3.53267e+06	5.38544e+06	Dettingen unter Teck	0	12.4681	3	0.2	0.049296	0	0.107692	1454.4	1.70997e+06	0.00989906	1.37194	1.76895	0.12934	1.03196	668.88	726.722	155.563	0	0
1709	3.51669e+06	5.37089e+06	Pfullingen	1	1.77779	0	0.363636	0.576923	0.285714	0.567568	5894.8	104667	0.0156468	1.16265	1.70163	0.117938	1.10118	0	205.061	30	0	0
1710	3.53373e+06	5.38403e+06	Owen	0	16.6184	3	0.133333	0.47619	1	0.354167	1841.3	2.05861e+06	0.00932867	1.31243	1.74632	0.117756	1.05	150.333	356.931	145.774	0	0
1711	3.52631e+06	5.37945e+06	Neuffen	0	5.6065	3	0.333333	0.326531	0.333333	0.222222	2026	674506	0.0153244	1.28788	1.79529	0.111786	1.13303	791.912	569.956	65	0	0
1712	3.51988e+06	5.37163e+06	Eningen unter Achalm	0	4.44961	0	0.388889	0.6	0.4	0.392857	422.5	321504	0.0207117	1.29455	1.67437	0.110704	1.02949	0	688.713	29.1548	0	0
1713	3.53281e+06	5.38289e+06	Owen	0	10.139	3	0.133333	0.47619	1	0.354167	2816.6	1.39443e+06	0.0107842	1.31243	1.74632	0.117756	1.05	120.83	150	25	0	0
1714	3.53929e+06	5.38967e+06	Ohmden	1	4.72323	3	0.5	0.103448	0	0.148148	1353	464865	0.0102856	1.41308	2.06513	0.102155	1.23529	122.984	444.185	52.2015	0	0
1715	3.5348e+06	5.39587e+06	Hochdorf	1	2.75249	3	0.052632	0.307692	1	0.129032	8602.8	539415	0.0175797	1.34266	2.08222	0.0941176	1.33333	138.924	686.222	5	0	0
1716	3.52099e+06	5.38245e+06	Bempflingen	1	0.800157	3	0.333333	0.363636	1	0.272727	136807	20969	0.0362233	1.26159	1.79849	0.0983425	1.38889	706.576	546.649	18.0278	0	0
1717	3.52426e+06	5.37844e+06	Neuffen	0	10.4865	3	0.333333	0.326531	0.333333	0.222222	1296.9	2.35355e+06	0.00791344	1.28788	1.79529	0.111786	1.13303	212.191	201.556	201.556	0	0
1718	3.53215e+06	5.38243e+06	Owen	1	5.85819	3	0.133333	0.47619	1	0.354167	12991	8679.24	0.0455278	1.31243	1.74632	0.117756	1.05	920.245	219.659	190	0	0
1719	3.49667e+06	5.36176e+06	Bodelshausen	0	1.62603	3	0.5	0.037037	0	0.25	1280.2	4032.98	0.121241	1.62158	2.06108	0.103155	1.18996	238.537	1095.05	265.377	0	0
1720	3.51776e+06	5.38015e+06	Reutlingen	0	5.66854	2	0.21978	0.19774	0.205882	0.215686	3411.9	108085	0.0233327	1.23563	1.5396	0.120979	1.29265	22.3607	147.139	20	0	0
1721	3.52417e+06	5.37762e+06	Dettingen an der Erms	0	8.15143	3	0.230769	0.166667	1	0.159091	510.9	2.35355e+06	0.00791344	1.25849	1.75538	0.113123	1.88725	327.185	460.652	190.263	0	0
1722	3.53491e+06	5.39333e+06	Notzingen	0	6.75051	3	0.2	0.16	0	0.181818	1791.2	83499.8	0.0410932	1.58633	2.37363	0.106287	1.20792	107.005	300	134.35	0	0
1723	3.52519e+06	5.37635e+06	Dettingen an der Erms	0	10.5262	3	0.230769	0.166667	1	0.159091	1529.1	1.10291e+06	0.0123476	1.25849	1.75538	0.113123	1.88725	340	147.054	126.491	0	0
1724	3.53635e+06	5.3885e+06	Kirchheim unter Teck	0	26.2648	4	0.181818	0.241379	0.181818	0.245098	15019.9	222812	0.0178614	1.22208	1.69769	0.119627	1.30893	205.73	389.005	47.1699	0	0
1725	3.53572e+06	5.38285e+06	Bissingen an der Teck	0	10.2863	5	0.333333	0.212766	0.5	0.254237	60486.4	1.06197e+06	0.0117425	1.35031	1.68719	0.114481	0.989418	1277.36	1539.51	305	1	0
1726	3.55659e+06	5.39085e+06	Gingen an der Fils	0	17.6766	4	0.25	0.588235	0	0.535714	140585	5882.02	0.054093	1.1043	1.56275	0.127738	1.25	845.237	56.5685	56.5685	0	0
1727	3.53442e+06	5.38198e+06	Lenningen	0	10.8243	3	0.277778	0.221311	0	0.288288	829.6	1.54264e+06	0.0133674	1.09145	1.55231	0.106074	0.965142	275.182	657.647	271.155	0	0
1728	3.53405e+06	5.38504e+06	Dettingen unter Teck	0	10.9117	3	0.2	0.049296	0	0.107692	1615.7	2.05861e+06	0.00932867	1.37194	1.76895	0.12934	1.03196	948.064	701.231	266.271	0	0
1729	3.50695e+06	5.37123e+06	Kusterdingen	0	3.93354	0	0.259259	0.168675	1	0.153226	0	47969.4	0.0242342	1.39645	1.80254	0.10766	1.5061	406.356	614.919	195.576	0	0
1730	3.51522e+06	5.37761e+06	Reutlingen	0	1.35942	2	0.21978	0.19774	0.205882	0.215686	1791.1	15640.8	0.0319774	1.23563	1.5396	0.120979	1.29265	38.0789	180	33.541	0	0
1731	3.53628e+06	5.39552e+06	Ebersbach an der Fils	0	7.95012	0	0.288136	0.571429	0	0.370787	3323.7	539415	0.0175797	1.1282	1.82888	0.0992791	1.14139	535.093	490.026	490.026	0	0
1732	3.54862e+06	5.39471e+06	Göppingen	0	12.9863	0	0.245902	0.57377	0.315789	0.36875	238037	521299	0.0169237	1.02208	1.4472	0.138668	1.15129	457.083	529.245	0	0	0
1733	3.54006e+06	5.38498e+06	Weilheim an der Teck	0	10.7697	3	0.297297	0.193798	0.230769	0.204545	1210.1	1.55086e+06	0.00669018	1.28113	1.82018	0.108577	1.03917	837.153	353.058	72.8011	1	0
1734	3.52884e+06	5.37936e+06	Neuffen	0	7.81249	3	0.333333	0.326531	0.333333	0.222222	543.5	34221.8	0.0276719	1.28788	1.79529	0.111786	1.13303	385.13	394.081	120.416	0	0
1735	3.50603e+06	5.36234e+06	Mössingen	0	4.27403	3	0.304348	0.11465	0	0.151316	27789.5	1.71355e+06	0.0133141	1.60177	2.13591	0.0976952	1.05316	1026.71	597.369	205	0	0
1736	3.51764e+06	5.36819e+06	Pfullingen	1	0.603114	3	0.363636	0.576923	0.285714	0.567568	654.2	1.02441e+06	0.00879794	1.16265	1.70163	0.117938	1.10118	246.221	147.054	147.054	1	0
1737	3.52551e+06	5.37621e+06	Dettingen an der Erms	0	16.0254	3	0.230769	0.166667	1	0.159091	1413.8	1.10291e+06	0.0123476	1.25849	1.75538	0.113123	1.88725	351.283	134.629	28.2843	0	0
1738	3.50676e+06	5.3694e+06	Gomaringen	0	5.88472	3	0.25	0.196429	0.5	0.155172	1274.6	25292.4	0.0541436	1.48373	1.85863	0.0970857	1.08571	21.2132	70.7107	50.9902	0	0
1739	3.51927e+06	5.37849e+06	Metzingen	0	4.69481	3	0.2	0.214953	0.428571	0.165138	2209.7	761523	0.0136683	1.18686	1.56641	0.121267	1.33648	536.656	397.02	185	0	0
1740	3.53295e+06	5.38235e+06	Owen	0	9.08289	3	0.133333	0.47619	1	0.354167	1998	1.39443e+06	0.0107842	1.31243	1.74632	0.117756	1.05	296.184	637.279	320.039	0	0
1741	3.54372e+06	5.38803e+06	Boll	0	13.8615	3	0.285714	2.5	1	0.538462	3664.4	111335	0.0227611	1.35042	1.91502	0.160651	1.21591	131.529	837.929	155.322	1	0
1742	3.52326e+06	5.37454e+06	Metzingen	0	11.8325	3	0.2	0.214953	0.428571	0.165138	979.7	242372	0.0124457	1.18686	1.56641	0.121267	1.33648	38.0789	255.783	35.3553	0	0
1743	3.55659e+06	5.39187e+06	Gingen an der Fils	0	8.16398	3	0.25	0.588235	0	0.535714	7454.8	544352	0.0179697	1.1043	1.56275	0.127738	1.25	559.933	420.387	420.387	0	0
1744	3.53759e+06	5.39642e+06	Ebersbach an der Fils	1	13.7545	0	0.288136	0.571429	0	0.370787	482.3	20934.9	0.0385995	1.1282	1.82888	0.0992791	1.14139	0	127.475	20.6155	0	0
1745	3.54094e+06	5.38492e+06	Weilheim an der Teck	0	2.50907	3	0.297297	0.193798	0.230769	0.204545	2417.7	416375	0.00954846	1.28113	1.82018	0.108577	1.03917	1024.02	432.695	31.6228	0	0
1746	3.5536e+06	5.39357e+06	Süßen	0	9.75948	3	0.166667	0.428571	0.333333	0.243243	1444.1	43098	0.0218803	1.2209	1.69688	0.108562	1.57604	729.126	101.242	22.3607	0	0
1747	3.53466e+06	5.38863e+06	Kirchheim unter Teck	1	0.934903	0	0.181818	0.241379	0.181818	0.245098	6625.1	5787.63	0.0578307	1.22208	1.69769	0.119627	1.30893	0	446.01	35.3553	0	0
1748	3.53537e+06	5.38069e+06	Lenningen	0	21.7888	0	0.277778	0.221311	0	0.288288	0	1.54264e+06	0.0133674	1.09145	1.55231	0.106074	0.965142	494.419	994.749	291.29	0	0
1749	3.53664e+06	5.38369e+06	Bissingen an der Teck	0	12.6285	3	0.333333	0.212766	0.5	0.254237	2432.8	534268	0.0160772	1.35031	1.68719	0.114481	0.989418	379.012	441.475	366.674	0	1
1750	3.52158e+06	5.37644e+06	Metzingen	0	24.0934	3	0.2	0.214953	0.428571	0.165138	357.7	505116	0.00726691	1.18686	1.56641	0.121267	1.33648	706.152	445.702	95	0	0
1751	3.51741e+06	5.37576e+06	Reutlingen	0	10.9502	3	0.21978	0.19774	0.205882	0.215686	1000.3	99088	0.0182547	1.23563	1.5396	0.120979	1.29265	94.8683	418.718	90.5538	0	0
1752	3.52569e+06	5.37957e+06	Neuffen	0	7.59359	3	0.333333	0.326531	0.333333	0.222222	1185.7	308893	0.0165857	1.28788	1.79529	0.111786	1.13303	386.685	528.441	419.076	0	0
1753	3.53138e+06	5.38952e+06	Kirchheim unter Teck	0	5.48617	3	0.181818	0.241379	0.181818	0.245098	2481	6159.77	0.101654	1.22208	1.69769	0.119627	1.30893	230.217	159.452	165.076	0	0
1754	3.51114e+06	5.36655e+06	Reutlingen	1	2.81509	0	0.21978	0.19774	0.205882	0.215686	1661.3	286101	0.0129011	1.23563	1.5396	0.120979	1.29265	0	80.7775	11.1803	0	0
1755	3.50541e+06	5.36476e+06	Nehren	0	6.87118	3	0	0	0	0	951	1.29779e+06	0.0060432	1.69551	2.29424	0.103814	1.45652	475.657	398.811	85	0	0
1756	3.53295e+06	5.3887e+06	Kirchheim unter Teck	0	3.73452	3	0.181818	0.241379	0.181818	0.245098	2222.1	11501.8	0.05203	1.22208	1.69769	0.119627	1.30893	357.351	127.475	136.473	0	0
1757	3.53235e+06	5.38864e+06	Kirchheim unter Teck	0	5.5191	2	0.181818	0.241379	0.181818	0.245098	14371.9	41116.3	0.0224512	1.22208	1.69769	0.119627	1.30893	602.516	240.832	67.2681	0	0
1758	3.53568e+06	5.38202e+06	Bissingen an der Teck	0	19.967	0	0.333333	0.212766	0.5	0.254237	0	1.54264e+06	0.0133674	1.35031	1.68719	0.114481	0.989418	1300.25	1915.94	666.483	1	0
1759	3.53196e+06	5.39343e+06	Wernau (Neckar)	0	8.93465	3	0.285714	0.214286	0	0.384615	2182	48091.4	0.0248862	0.987809	1.53707	0.0834862	1.16606	315.159	287.446	35	0	0
1760	3.51872e+06	5.3837e+06	Neckartenzlingen	0	7.88815	2	0	0.1	1	0.266667	876.3	219352	0.0200933	1.30354	1.90761	0.0887945	1.23404	69.6419	55	55	0	0
1761	3.50427e+06	5.36112e+06	Mössingen	0	10.4711	3	0.304348	0.11465	0	0.151316	42117.2	101634	0.0179874	1.60177	2.13591	0.0976952	1.05316	880.128	1748.37	39.0512	1	0
1762	3.50374e+06	5.3613e+06	Mössingen	0	12.4375	3	0.304348	0.11465	0	0.151316	1233.6	395296	0.0136412	1.60177	2.13591	0.0976952	1.05316	400.281	1215.01	200.125	0	1
1763	3.54215e+06	5.38283e+06	Neidlingen	0	10.5202	3	0.2	0.157143	1	0.114286	1524.6	881477	0.0160684	1.31936	1.78261	0.10745	0.909091	110	496.614	130.096	0	0
1764	3.53139e+06	5.38959e+06	Kirchheim unter Teck	1	2.92433	0	0.181818	0.241379	0.181818	0.245098	1518	6159.77	0.101654	1.22208	1.69769	0.119627	1.30893	166.508	96.0469	102.591	0	0
1765	3.53185e+06	5.38947e+06	Kirchheim unter Teck	1	8.98644	3	0.181818	0.241379	0.181818	0.245098	1455.9	29304.8	0.0241267	1.22208	1.69769	0.119627	1.30893	130.384	60.4152	60.4152	0	0
1766	3.5391e+06	5.38831e+06	Weilheim an der Teck	0	2.64356	3	0.297297	0.193798	0.230769	0.204545	1976.1	95363	0.0173961	1.28113	1.82018	0.108577	1.03917	332.866	80.6226	88.6002	0	0
1767	3.53411e+06	5.39119e+06	Kirchheim unter Teck	1	3.11884	3	0.181818	0.241379	0.181818	0.245098	4737.4	189015	0.0181657	1.22208	1.69769	0.119627	1.30893	183.098	270.185	7.07107	0	0
1768	3.52888e+06	5.39005e+06	Oberboihingen	0	25.554	3	0.285714	0.357143	0	0.444444	232172	26683.8	0.0367963	1.40177	1.84244	0.101036	1.11644	926.35	731.471	301.869	0	0
1769	3.53392e+06	5.3837e+06	Owen	0	7.63043	3	0.133333	0.47619	1	0.354167	1439.4	2.05861e+06	0.00932867	1.31243	1.74632	0.117756	1.05	171.026	14.1421	14.1421	0	0
1770	3.5094e+06	5.37181e+06	Kusterdingen	0	9.17687	0	0.259259	0.168675	1	0.153226	5422	774234	0.0129779	1.39645	1.80254	0.10766	1.5061	721.543	894.497	318.002	0	0
1771	3.54823e+06	5.38903e+06	Gammelshausen	0	3.47449	3	0.25	0.5	0	0.4375	9792.2	139492	0.0163004	2.12843	2.98473	0.0807799	1.33333	15.8114	215	10	0	0
1772	3.53554e+06	5.38178e+06	Lenningen	0	9.97293	0	0.277778	0.221311	0	0.288288	0	1.54264e+06	0.0133674	1.09145	1.55231	0.106074	0.965142	1030.59	1690.22	892.37	0	0
1773	3.55427e+06	5.39301e+06	Süßen	1	6.55487	0	0.166667	0.428571	0.333333	0.243243	684.8	16169.9	0.0423479	1.2209	1.69688	0.108562	1.57604	0	220.737	28.2843	0	0
1774	3.52712e+06	5.38154e+06	Neuffen	0	4.43282	3	0.333333	0.326531	0.333333	0.222222	1248	1.34387e+06	0.00860131	1.28788	1.79529	0.111786	1.13303	591.354	551.77	375.533	0	0
1775	3.52683e+06	5.38241e+06	Frickenhausen	0	9.44168	0	0.125	0.076923	0.5	0.054054	1585.6	1.34387e+06	0.00860131	1.19047	1.7225	0.103565	1.05882	134.629	564.026	32.0156	0	0
1776	3.51319e+06	5.37166e+06	Reutlingen	0	2.71215	3	0.21978	0.19774	0.205882	0.215686	1958.4	597842	0.0117804	1.23563	1.5396	0.120979	1.29265	335.894	753.276	25	0	0
1777	3.53444e+06	5.39102e+06	Kirchheim unter Teck	1	10.6819	3	0.181818	0.241379	0.181818	0.245098	3752.5	285161	0.00989804	1.22208	1.69769	0.119627	1.30893	176.706	66.7083	66.7083	0	0
1778	3.55916e+06	5.39085e+06	Kuchen	1	11.0275	3	0.333333	1	0	0.6	4043.3	482787	0.0230543	1.02878	1.52941	0.11358	1.13072	688.93	1220.66	47.1699	0	0
1779	3.51324e+06	5.37196e+06	Reutlingen	0	6.91467	3	0.21978	0.19774	0.205882	0.215686	1623.9	597842	0.0117804	1.23563	1.5396	0.120979	1.29265	120.934	905.166	70.7107	0	0
1780	3.51679e+06	5.37085e+06	Pfullingen	1	0.977466	0	0.363636	0.576923	0.285714	0.567568	930.9	104667	0.0156468	1.16265	1.70163	0.117938	1.10118	0	299.082	44.7214	0	0
1781	3.54976e+06	5.38994e+06	Eschenbach	1	12.0413	3	0.142857	0.583333	0	0.375	4795.2	55788.9	0.0315802	2.23722	2.98246	0.110795	1.37879	410.67	1234.38	162.788	0	0
1782	3.52784e+06	5.37826e+06	Neuffen	0	7.09697	3	0.333333	0.326531	0.333333	0.222222	948.8	1.04757e+06	0.0118645	1.28788	1.79529	0.111786	1.13303	741.485	1050.06	60.8276	0	0
1783	3.53517e+06	5.38139e+06	Lenningen	0	5.51648	3	0.277778	0.221311	0	0.288288	264.1	1.54264e+06	0.0133674	1.09145	1.55231	0.106074	0.965142	486.544	1145.6	415.482	0	0
1784	3.54094e+06	5.38438e+06	Weilheim an der Teck	1	13.8473	0	0.297297	0.193798	0.230769	0.204545	5309.6	881477	0.0160684	1.28113	1.82018	0.108577	1.03917	680.827	284.429	284.429	0	0
1785	3.5489e+06	5.39458e+06	Göppingen	0	15.1606	3	0.245902	0.57377	0.315789	0.36875	6988.7	521299	0.0169237	1.02208	1.4472	0.138668	1.15129	596.091	341.321	97.0824	0	0
1786	3.55912e+06	5.39014e+06	Kuchen	0	11.3938	3	0.333333	1	0	0.6	11935.9	482787	0.0230543	1.02878	1.52941	0.11358	1.13072	175	886.707	85	0	0
1787	3.54716e+06	5.39106e+06	Dürnau	1	2.28057	3	0.461538	0.545455	1	0.5	7321.7	40594	0.0265829	1.42809	2.06038	0.0877763	1.47761	137.568	568.177	145.344	0	0
1788	3.51529e+06	5.36974e+06	Pfullingen	0	21.692	0	0.363636	0.576923	0.285714	0.567568	1099.8	898104	0.00809342	1.16265	1.70163	0.117938	1.10118	485.412	1129.35	40.3113	0	0
1789	3.53568e+06	5.39547e+06	Hochdorf	0	7.56188	3	0.052632	0.307692	1	0.129032	1619.9	539415	0.0175797	1.34266	2.08222	0.0941176	1.33333	494.899	466.503	127.475	0	0
1790	3.52041e+06	5.38076e+06	Riederich	0	3.95002	3	0	0	0	0	1081.6	257751	0.0186256	1.66874	2.11765	0.101444	1.31193	313.249	571.008	127.769	0	0
1791	3.52542e+06	5.37962e+06	Kohlberg	0	17.7245	4	0.25	0.076923	0	0.035714	1717.9	308893	0.0165857	1.33489	1.88101	0.109253	1.40323	196.469	616.137	221.923	0	0
1792	3.51774e+06	5.37387e+06	Reutlingen	0	19.5411	0	0.21978	0.19774	0.205882	0.215686	3659.4	851648	0.00670136	1.23563	1.5396	0.120979	1.29265	512.762	220.511	91.9239	0	0
1793	3.53114e+06	5.38926e+06	Kirchheim unter Teck	0	4.16831	3	0.181818	0.241379	0.181818	0.245098	2331.5	59974.4	0.0285757	1.22208	1.69769	0.119627	1.30893	416.203	282.843	282.843	0	0
1794	3.54581e+06	5.39776e+06	Göppingen	0	6.74261	3	0.245902	0.57377	0.315789	0.36875	1939.1	175505	0.0147344	1.02208	1.4472	0.138668	1.15129	44.7214	167.705	69.4622	0	0
1795	3.50877e+06	5.36894e+06	Gomaringen	0	17.48	3	0.25	0.196429	0.5	0.155172	963.1	359254	0.0105774	1.48373	1.85863	0.0970857	1.08571	378.451	397.146	220.227	0	0
1796	3.52249e+06	5.37622e+06	Metzingen	0	7.9206	2	0.2	0.214953	0.428571	0.165138	1708.8	198916	0.0294673	1.18686	1.56641	0.121267	1.33648	253.476	148.071	129.711	0	0
1797	3.51153e+06	5.37638e+06	Wannweil	1	9.2161	3	0.5	0.2	0.2	0.166667	321.6	10020.8	0.0685886	1.10228	1.56674	0.126792	1.42478	226.108	234.094	40.3113	0	0
1798	3.52817e+06	5.37849e+06	Neuffen	0	5.8023	3	0.333333	0.326531	0.333333	0.222222	1665.9	1.04757e+06	0.0118645	1.28788	1.79529	0.111786	1.13303	465	655.687	256.223	0	0
1799	3.52086e+06	5.3807e+06	Riederich	0	6.14065	2	0	0	0	0	689.4	257751	0.0186256	1.66874	2.11765	0.101444	1.31193	628.172	660.681	97.0824	0	0
1800	3.54889e+06	5.38968e+06	Heiningen	1	14.8511	3	0.185185	0.526316	1	0.348837	5065.9	45719.8	0.0388304	1.53551	2.04153	0.103488	1.07647	560.892	896.172	35	0	0
1801	3.51614e+06	5.3705e+06	Pfullingen	0	20.6464	0	0.363636	0.576923	0.285714	0.567568	2206.4	898104	0.00809342	1.16265	1.70163	0.117938	1.10118	71.5891	260.768	0	0	0
1802	3.50329e+06	5.36461e+06	Ofterdingen	0	22.0327	3	0.363636	0.076923	1	0.142857	958.6	239498	0.0229242	1.64931	2.09688	0.10547	0.946809	105.475	285.044	87.4643	0	0
1803	3.53314e+06	5.38799e+06	Dettingen unter Teck	0	4.44041	3	0.2	0.049296	0	0.107692	1640.3	184116	0.0232693	1.37194	1.76895	0.12934	1.03196	131.529	415.03	219.545	0	0
1804	3.50377e+06	5.3695e+06	Dußlingen	0	3.8149	3	0.2	0.128205	0	0.090909	960.2	247311	0.0192261	1.22642	1.77338	0.102978	0.989209	431.045	857.351	208.926	0	0
1805	3.50414e+06	5.36195e+06	Mössingen	0	8.90019	3	0.304348	0.11465	0	0.151316	497	1.71355e+06	0.0133141	1.60177	2.13591	0.0976952	1.05316	286.531	987.952	273.542	0	0
1806	3.51509e+06	5.36854e+06	Pfullingen	0	14.1722	3	0.363636	0.576923	0.285714	0.567568	3809	349775	0.0184245	1.16265	1.70163	0.117938	1.10118	328.672	169.779	60	0	0
1807	3.51912e+06	5.3797e+06	Riederich	0	24.9118	3	0	0	0	0	1062.7	237486	0.0153029	1.66874	2.11765	0.101444	1.31193	55.9017	180.693	52.2015	0	0
1808	3.55931e+06	5.39055e+06	Kuchen	0	8.06003	3	0.333333	1	0	0.6	4265.7	482787	0.0230543	1.02878	1.52941	0.11358	1.13072	534.158	1203.01	156.605	0	0
1809	3.53028e+06	5.39113e+06	Kirchheim unter Teck	1	4.43042	2	0.181818	0.241379	0.181818	0.245098	6394.7	11685.5	0.0665487	1.22208	1.69769	0.119627	1.30893	185	471.832	5	0	0
1810	3.54014e+06	5.38336e+06	Weilheim an der Teck	0	18.2594	0	0.297297	0.193798	0.230769	0.204545	1028.4	1.48249e+06	0.00924149	1.28113	1.82018	0.108577	1.03917	255.441	318.277	75.6637	0	0
1811	3.52239e+06	5.37784e+06	Metzingen	1	12.9854	0	0.2	0.214953	0.428571	0.165138	1050.8	16516.4	0.0329563	1.18686	1.56641	0.121267	1.33648	0	599.27	7.07107	0	0
1812	3.55828e+06	5.38848e+06	Kuchen	0	9.31934	3	0.333333	1	0	0.6	358.8	1.18824e+06	0.0115027	1.02878	1.52941	0.11358	1.13072	116.726	839.002	125.399	0	0
1813	3.5577e+06	5.39218e+06	Gingen an der Fils	0	1.46179	2	0.25	0.588235	0	0.535714	1611	35476.1	0.0367002	1.1043	1.56275	0.127738	1.25	126.491	696.94	133.417	0	0
1814	3.52259e+06	5.38383e+06	Großbettlingen	1	8.3312	0	0.333333	0.222222	0	0.25	622.2	36788.3	0.0238474	1.73035	2.47265	0.0858525	1.60976	0	185.607	25	0	0
1815	3.51753e+06	5.37774e+06	Reutlingen	0	5.63948	3	0.21978	0.19774	0.205882	0.215686	967.1	69868.8	0.0329417	1.23563	1.5396	0.120979	1.29265	339.779	224.611	28.2843	0	0
1816	3.52665e+06	5.38242e+06	Frickenhausen	0	15.3905	3	0.125	0.076923	0.5	0.054054	1189.1	1.34387e+06	0.00860131	1.19047	1.7225	0.103565	1.05882	310.645	679.154	170.294	0	0
1817	3.51763e+06	5.37468e+06	Reutlingen	1	19.4635	0	0.21978	0.19774	0.205882	0.215686	51185.4	851648	0.00670136	1.23563	1.5396	0.120979	1.29265	82.0061	18.0278	25	0	0
1818	3.53196e+06	5.38325e+06	Owen	0	9.54428	3	0.133333	0.47619	1	0.354167	1113	135796	0.0209053	1.31243	1.74632	0.117756	1.05	952.326	385.778	21.2132	0	0
1819	3.51125e+06	5.36738e+06	Reutlingen	0	5.97034	0	0.21978	0.19774	0.205882	0.215686	6919	408466	0.0191366	1.23563	1.5396	0.120979	1.29265	200.811	11.1803	11.1803	0	0
1820	3.52705e+06	5.38074e+06	Neuffen	0	12.7074	0	0.333333	0.326531	0.333333	0.222222	3606	1.20814e+06	0.013945	1.28788	1.79529	0.111786	1.13303	129.808	733.349	143.178	0	0
1821	3.51334e+06	5.37178e+06	Reutlingen	1	5.59816	3	0.21978	0.19774	0.205882	0.215686	3805.3	597842	0.0117804	1.23563	1.5396	0.120979	1.29265	150	735.935	110.454	0	0
1822	3.53699e+06	5.3898e+06	Kirchheim unter Teck	1	5.63711	0	0.181818	0.241379	0.181818	0.245098	6404	329072	0.0147349	1.22208	1.69769	0.119627	1.30893	712.127	20	0	1	0
1823	3.51343e+06	5.37768e+06	Reutlingen	0	12.1282	2	0.21978	0.19774	0.205882	0.215686	1109.3	60736	0.0337223	1.23563	1.5396	0.120979	1.29265	122.577	342.527	56.5685	0	0
1824	3.53786e+06	5.39021e+06	Ohmden	0	7.1319	3	0.5	0.103448	0	0.148148	2225.2	584209	0.0130428	1.41308	2.06513	0.102155	1.23529	342.527	469.92	389.936	0	0
1825	3.51082e+06	5.37461e+06	Wannweil	0	8.66013	0	0.5	0.2	0.2	0.166667	13202.6	359132	0.0117938	1.10228	1.56674	0.126792	1.42478	455.412	1040.48	213.776	0	0
1826	3.54065e+06	5.38294e+06	Neidlingen	0	12.0521	0	0.2	0.157143	1	0.114286	1262.8	1.48249e+06	0.00924149	1.31936	1.78261	0.10745	0.909091	461.546	616.198	254.657	0	0
1827	3.54488e+06	5.39596e+06	Göppingen	1	6.60878	3	0.245902	0.57377	0.315789	0.36875	9211.5	32968.7	0.02744	1.02208	1.4472	0.138668	1.15129	499.299	261.63	14.1421	0	0
1828	3.55287e+06	5.39078e+06	Schlat	1	2.86988	3	0.5	0.363636	0	0.361111	128442	26431.3	0.0355877	1.21365	1.90775	0.123203	1.17333	29.1548	674.259	41.2311	0	0
1829	3.55157e+06	5.39016e+06	Schlat	0	6.0141	3	0.5	0.363636	0	0.361111	6083	201650	0.0267818	1.21365	1.90775	0.123203	1.17333	244.182	347.922	68.0074	0	0
1830	3.53204e+06	5.39343e+06	Wernau (Neckar)	0	12.3665	3	0.285714	0.214286	0	0.384615	789	48091.4	0.0248862	0.987809	1.53707	0.0834862	1.16606	373.263	352.278	30	0	0
1831	3.52197e+06	5.3763e+06	Metzingen	0	5.52377	2	0.2	0.214953	0.428571	0.165138	1806.7	505116	0.00726691	1.18686	1.56641	0.121267	1.33648	585.683	347.635	190.066	0	0
1832	3.54173e+06	5.3923e+06	Hattenhofen	0	4.51681	3	0.1	0.55	0	0.342105	1861.9	39397.7	0.032332	1.84567	2.32571	0.107832	1.25893	18.0278	82.7647	46.0977	0	0
1833	3.53676e+06	5.39008e+06	Kirchheim unter Teck	0	13.8753	3	0.181818	0.241379	0.181818	0.245098	7515.8	329072	0.0147349	1.22208	1.69769	0.119627	1.30893	802.309	285.351	144.222	1	0
1834	3.52934e+06	5.39155e+06	Wendlingen am Neckar	0	6.52638	2	0.357143	0.071429	0.333333	0.375	500.4	403361	0.00978381	1.17744	1.7408	0.0861055	1.28011	557.001	570.197	42.72	0	0
1835	3.50454e+06	5.36406e+06	Mössingen	0	3.35322	3	0.304348	0.11465	0	0.151316	1464.5	1.29779e+06	0.0060432	1.60177	2.13591	0.0976952	1.05316	44.7214	210.95	86.0233	0	0
1836	3.53929e+06	5.385e+06	Weilheim an der Teck	0	14.5308	4	0.297297	0.193798	0.230769	0.204545	707.9	1.55086e+06	0.00669018	1.28113	1.82018	0.108577	1.03917	933.408	1112.05	286.225	1	0
1837	3.52727e+06	5.38024e+06	Neuffen	0	20.002	3	0.333333	0.326531	0.333333	0.222222	5320.1	1.20814e+06	0.013945	1.28788	1.79529	0.111786	1.13303	73.8241	394.271	161.012	0	0
1838	3.51132e+06	5.36698e+06	Reutlingen	0	15.4119	3	0.21978	0.19774	0.205882	0.215686	1141	286101	0.0129011	1.23563	1.5396	0.120979	1.29265	25	281.469	58.3095	0	0
1839	3.53215e+06	5.38646e+06	Dettingen unter Teck	0	12.4388	3	0.2	0.049296	0	0.107692	3054.3	1.70997e+06	0.00989906	1.37194	1.76895	0.12934	1.03196	769.675	1466.47	140.801	0	0
1840	3.51169e+06	5.36761e+06	Reutlingen	0	5.24445	3	0.21978	0.19774	0.205882	0.215686	4280.4	408466	0.0191366	1.23563	1.5396	0.120979	1.29265	652.993	161.245	46.0977	0	0
1841	3.557e+06	5.39292e+06	Süßen	1	0.292126	2	0.166667	0.428571	0.333333	0.243243	3073	243599	0.019395	1.2209	1.69688	0.108562	1.57604	280.401	524.023	269.537	0	0
1842	3.53404e+06	5.3855e+06	Dettingen unter Teck	0	17.7985	3	0.2	0.049296	0	0.107692	4589.8	2.05861e+06	0.00932867	1.37194	1.76895	0.12934	1.03196	574.543	582.495	105.948	0	0
1843	3.53557e+06	5.38092e+06	Lenningen	0	21.3834	0	0.277778	0.221311	0	0.288288	0	1.54264e+06	0.0133674	1.09145	1.55231	0.106074	0.965142	635.02	1247.69	361.248	0	0
1844	3.53924e+06	5.39034e+06	Ohmden	0	15.3779	3	0.5	0.103448	0	0.148148	1389.3	584209	0.0130428	1.41308	2.06513	0.102155	1.23529	140.357	154.029	154.029	0	0
1845	3.54147e+06	5.3822e+06	Neidlingen	1	15.0103	4	0.2	0.157143	1	0.114286	13369.2	11459.9	0.0458474	1.31936	1.78261	0.10745	0.909091	240.52	375.832	180	0	0
1846	3.52814e+06	5.38322e+06	Frickenhausen	0	11.2737	3	0.125	0.076923	0.5	0.054054	1964.1	1.08813e+06	0.00929233	1.19047	1.7225	0.103565	1.05882	477.127	770.097	20.6155	0	0
1847	3.5077e+06	5.36938e+06	Gomaringen	1	1.11459	0	0.25	0.196429	0.5	0.155172	804.9	35250	0.0210183	1.48373	1.85863	0.0970857	1.08571	0	126.194	11.1803	0	0
1848	3.51412e+06	5.37246e+06	Reutlingen	1	4.97528	0	0.21978	0.19774	0.205882	0.215686	7356.3	597842	0.0117804	1.23563	1.5396	0.120979	1.29265	5	69.4622	0	0	0
1849	3.54071e+06	5.38781e+06	Weilheim an der Teck	1	23.8244	0	0.297297	0.193798	0.230769	0.204545	61948.7	1.26914e+06	0.00550867	1.28113	1.82018	0.108577	1.03917	0	183.848	7.07107	0	0
1850	3.53264e+06	5.39176e+06	Notzingen	0	9.7827	3	0.2	0.16	0	0.181818	3782.9	97371.2	0.0324604	1.58633	2.37363	0.106287	1.20792	40.3113	160.312	159.138	0	0
1851	3.52258e+06	5.37557e+06	Metzingen	0	4.17011	0	0.2	0.214953	0.428571	0.165138	3139.1	198916	0.0294673	1.18686	1.56641	0.121267	1.33648	382.884	163.478	35	0	0
1852	3.54217e+06	5.39433e+06	Albershausen	0	7.10247	2	0.214286	0.6	1	0.375	2046.6	68338.5	0.0310551	1.36751	1.81129	0.104651	1.18939	325.576	239.426	25	0	0
1853	3.5513e+06	5.39448e+06	Göppingen	0	5.49624	2	0.245902	0.57377	0.315789	0.36875	1791.3	18339	0.0317269	1.02208	1.4472	0.138668	1.15129	22.3607	284.297	20.6155	0	0
1854	3.5426e+06	5.38974e+06	Zell unter Aichelberg	1	2.93314	2	0.266667	0.291667	0	0.297297	1579.1	121175	0.0174194	2.1257	2.71429	0.101889	1.52475	15	65	22.3607	0	0
1855	3.51935e+06	5.38116e+06	Bempflingen	0	15.7828	3	0.333333	0.363636	1	0.272727	56320	55491.2	0.0223587	1.26159	1.79849	0.0983425	1.38889	95.1315	68.0074	68.0074	0	0
1856	3.53083e+06	5.39168e+06	Kirchheim unter Teck	1	0.912417	0	0.181818	0.241379	0.181818	0.245098	14875.7	163767	0.0222553	1.22208	1.69769	0.119627	1.30893	0	260.768	20	0	0
1857	3.51441e+06	5.37786e+06	Reutlingen	1	3.1476	2	0.21978	0.19774	0.205882	0.215686	2210.7	40779.4	0.0197369	1.23563	1.5396	0.120979	1.29265	103.078	420.387	87.4643	0	0
1858	3.50505e+06	5.36472e+06	Nehren	0	4.63398	3	0	0	0	0	828.3	1.29779e+06	0.0060432	1.69551	2.29424	0.103814	1.45652	311.97	36.4006	36.4006	0	0
1859	3.55128e+06	5.39031e+06	Schlat	0	12.595	3	0.5	0.363636	0	0.361111	657.4	201650	0.0267818	1.21365	1.90775	0.123203	1.17333	465.108	654.313	382.001	0	0
1860	3.51722e+06	5.37656e+06	Reutlingen	0	7.24578	3	0.21978	0.19774	0.205882	0.215686	2124.7	97829.1	0.0136793	1.23563	1.5396	0.120979	1.29265	263.866	302.035	25	0	0
1861	3.53436e+06	5.38204e+06	Lenningen	0	9.92195	3	0.277778	0.221311	0	0.288288	971.1	1.54264e+06	0.0133674	1.09145	1.55231	0.106074	0.965142	200.811	601.332	197.8	0	0
1862	3.53233e+06	5.39215e+06	Notzingen	0	6.29502	3	0.2	0.16	0	0.181818	1771	53990.5	0.0237844	1.58633	2.37363	0.106287	1.20792	467.039	90.1388	90.1388	0	0
1863	3.53683e+06	5.39541e+06	Ebersbach an der Fils	1	4.10946	3	0.288136	0.571429	0	0.370787	1490	539415	0.0175797	1.1282	1.82888	0.0992791	1.14139	69.4622	497.293	77.7817	0	0
1864	3.54851e+06	5.39829e+06	Göppingen	1	13.1015	3	0.245902	0.57377	0.315789	0.36875	20044.3	34116.3	0.0243432	1.02208	1.4472	0.138668	1.15129	88.6002	387.331	53.8516	0	0
1865	3.49696e+06	5.36204e+06	Bodelshausen	0	2.17429	3	0.5	0.037037	0	0.25	880.1	97033.9	0.0257311	1.62158	2.06108	0.103155	1.18996	431.045	972.548	15	0	0
1866	3.53487e+06	5.38128e+06	Lenningen	0	9.99917	4	0.277778	0.221311	0	0.288288	6032.2	1.54264e+06	0.0133674	1.09145	1.55231	0.106074	0.965142	257.099	878.251	143.265	0	0
1867	3.524e+06	5.37976e+06	Kohlberg	0	14.0634	3	0.25	0.076923	0	0.035714	1001.2	305005	0.0192568	1.33489	1.88101	0.109253	1.40323	311.006	343.111	301.496	0	0
1868	3.51174e+06	5.37545e+06	Wannweil	0	5.61435	0	0.5	0.2	0.2	0.166667	1771.9	91018.3	0.0290479	1.10228	1.56674	0.126792	1.42478	0	197.041	28.2843	0	0
1869	3.53651e+06	5.38821e+06	Kirchheim unter Teck	0	2.44078	3	0.181818	0.241379	0.181818	0.245098	4003.7	222812	0.0178614	1.22208	1.69769	0.119627	1.30893	390.8	138.293	146.373	0	0
1870	3.52725e+06	5.3847e+06	Frickenhausen	0	7.40396	3	0.125	0.076923	0.5	0.054054	2377.6	1.08813e+06	0.00929233	1.19047	1.7225	0.103565	1.05882	40.3113	890.955	22.3607	0	0
1871	3.53361e+06	5.38088e+06	Lenningen	1	8.87462	3	0.277778	0.221311	0	0.288288	2095.4	530404	0.0193153	1.09145	1.55231	0.106074	0.965142	107.355	293.002	14.1421	0	0
1872	3.50768e+06	5.36931e+06	Gomaringen	1	5.30313	0	0.25	0.196429	0.5	0.155172	2100	35250	0.0210183	1.48373	1.85863	0.0970857	1.08571	0	84.8528	28.2843	0	0
1873	3.54055e+06	5.38783e+06	Weilheim an der Teck	1	2.84992	0	0.297297	0.193798	0.230769	0.204545	484.4	1.26914e+06	0.00550867	1.28113	1.82018	0.108577	1.03917	0	101.242	5	0	0
1874	3.54573e+06	5.38962e+06	Boll	0	2.57141	3	0.285714	2.5	1	0.538462	6152.4	68412.9	0.0244689	1.35042	1.91502	0.160651	1.21591	90	355.106	115	0	0
1875	3.49804e+06	5.36022e+06	Hechingen	1	11.5483	0	0.236842	0.175	0	0.220126	954.8	168327	0.0121397	1.18938	1.61633	0.133193	1.31471	0	36.0555	36.0555	0	0
1876	3.50579e+06	5.36406e+06	Mössingen	0	21.1514	5	0.304348	0.11465	0	0.151316	3400.6	115506	0.0151859	1.60177	2.13591	0.0976952	1.05316	297.7	235.053	200	0	0
1877	3.54033e+06	5.38768e+06	Weilheim an der Teck	1	22.8654	0	0.297297	0.193798	0.230769	0.204545	535.5	16628.6	0.0320361	1.28113	1.82018	0.108577	1.03917	0	10	10	0	0
1878	3.53562e+06	5.38342e+06	Bissingen an der Teck	0	7.16932	3	0.333333	0.212766	0.5	0.254237	2471.9	1.06197e+06	0.0117425	1.35031	1.68719	0.114481	0.989418	753.077	1333.69	15	0	1
1879	3.51995e+06	5.38128e+06	Bempflingen	0	6.99729	3	0.333333	0.363636	1	0.272727	1715.8	13041	0.0379065	1.26159	1.79849	0.0983425	1.38889	63.2456	117.047	91.2414	0	0
1880	3.54929e+06	5.39426e+06	Heiningen	0	4.38952	3	0.185185	0.526316	1	0.348837	42739.6	29286.7	0.0307202	1.53551	2.04153	0.103488	1.07647	226.385	127.769	127.769	0	0
1881	3.55974e+06	5.39396e+06	Donzdorf	0	7.03209	0	0.327273	0.537037	0	0.479592	792.1	15670.9	0.0483647	1.1454	1.8843	0.103731	1.31707	0	605.31	21.2132	0	0
1882	3.53385e+06	5.38338e+06	Owen	0	14.642	3	0.133333	0.47619	1	0.354167	889.6	2.05861e+06	0.00932867	1.31243	1.74632	0.117756	1.05	155.322	190.394	179.234	0	0
1883	3.5025e+06	5.3633e+06	Mössingen	1	3.1154	4	0.304348	0.11465	0	0.151316	67941.9	9129.48	0.043619	1.60177	2.13591	0.0976952	1.05316	93.4077	365.308	91.9239	0	0
1884	3.50703e+06	5.36185e+06	Mössingen	0	6.50275	3	0.304348	0.11465	0	0.151316	3793.5	1.71355e+06	0.0133141	1.60177	2.13591	0.0976952	1.05316	746.408	216.391	20.6155	0	1
1885	3.53899e+06	5.38542e+06	Weilheim an der Teck	0	7.03343	0	0.297297	0.193798	0.230769	0.204545	1897.5	1.55086e+06	0.00669018	1.28113	1.82018	0.108577	1.03917	450.694	915.123	253.18	1	0
1886	3.53321e+06	5.38107e+06	Lenningen	0	15.1804	3	0.277778	0.221311	0	0.288288	876.3	530404	0.0193153	1.09145	1.55231	0.106074	0.965142	458.312	578.705	409.207	0	0
1887	3.53036e+06	5.38237e+06	Beuren	0	11.5359	3	0.076923	0.333333	0.333333	0.195652	3150.1	508268	0.0193484	1.14684	1.5569	0.11726	1.02703	646.413	501.597	90	0	0
1888	3.50993e+06	5.37185e+06	Reutlingen	0	5.3888	3	0.21978	0.19774	0.205882	0.215686	509.9	774234	0.0129779	1.23563	1.5396	0.120979	1.29265	431.422	618.324	163.248	0	0
1889	3.5068e+06	5.37393e+06	Kusterdingen	1	5.39698	2	0.259259	0.168675	1	0.153226	2209.5	51915.4	0.0246001	1.39645	1.80254	0.10766	1.5061	261.199	714.86	314.006	0	0
1890	3.55183e+06	5.39088e+06	Schlat	0	6.96707	3	0.5	0.363636	0	0.361111	6861.4	197289	0.0199119	1.21365	1.90775	0.123203	1.17333	5	218.403	11.1803	0	0
1891	3.53393e+06	5.38009e+06	Lenningen	0	11.4735	3	0.277778	0.221311	0	0.288288	1404	296509	0.0134553	1.09145	1.55231	0.106074	0.965142	186.815	190	190	0	0
1892	3.53317e+06	5.38814e+06	Dettingen unter Teck	0	1.87811	3	0.2	0.049296	0	0.107692	1106.6	184116	0.0232693	1.37194	1.76895	0.12934	1.03196	109.659	266.552	91.7878	0	0
1893	3.5224e+06	5.3836e+06	Großbettlingen	0	4.37902	3	0.333333	0.222222	0	0.25	1280.6	109525	0.0177061	1.73035	2.47265	0.0858525	1.60976	65	100.623	100.623	0	0
1894	3.5306e+06	5.38942e+06	Kirchheim unter Teck	1	4.68279	3	0.181818	0.241379	0.181818	0.245098	1581.5	20871.2	0.0332589	1.22208	1.69769	0.119627	1.30893	206.155	173.277	173.277	0	0
1895	3.51795e+06	5.37337e+06	Reutlingen	1	14.5909	4	0.21978	0.19774	0.205882	0.215686	21417	851648	0.00670136	1.23563	1.5396	0.120979	1.29265	696.312	490.23	30.4138	0	0
1896	3.53219e+06	5.38669e+06	Dettingen unter Teck	0	4.34492	3	0.2	0.049296	0	0.107692	1621.5	1.70997e+06	0.00989906	1.37194	1.76895	0.12934	1.03196	630.436	1445	49.2443	0	0
1897	3.5436e+06	5.39095e+06	Göppingen	1	2.51662	3	0.245902	0.57377	0.315789	0.36875	8315.5	4767.66	0.100037	1.02208	1.4472	0.138668	1.15129	291.548	1389.87	134.164	0	0
1898	3.5035e+06	5.36836e+06	Dußlingen	1	4.08969	3	0.2	0.128205	0	0.090909	1088.9	2199.9	0.096232	1.22642	1.77338	0.102978	0.989209	145.774	1047.02	362.25	0	0
1899	3.53804e+06	5.38418e+06	Bissingen an der Teck	0	11.0386	3	0.333333	0.212766	0.5	0.254237	2443.8	188298	0.0141442	1.35031	1.68719	0.114481	0.989418	1317.46	766.045	53.8516	0	1
1900	3.52425e+06	5.37802e+06	Dettingen an der Erms	0	9.73873	3	0.230769	0.166667	1	0.159091	1754.1	2.35355e+06	0.00791344	1.25849	1.75538	0.113123	1.88725	561.36	284.605	284.605	0	0
1901	3.50571e+06	5.36406e+06	Mössingen	0	18.4828	5	0.304348	0.11465	0	0.151316	1240.9	115506	0.0151859	1.60177	2.13591	0.0976952	1.05316	223.607	167.705	167.705	0	0
1902	3.50725e+06	5.36233e+06	Mössingen	0	14.7764	4	0.304348	0.11465	0	0.151316	905	65982.9	0.0346626	1.60177	2.13591	0.0976952	1.05316	1056.22	258.118	35	0	1
1903	3.5127e+06	5.3764e+06	Reutlingen	0	1.88244	2	0.21978	0.19774	0.205882	0.215686	1742.7	18120.7	0.0474681	1.23563	1.5396	0.120979	1.29265	69.4622	21.2132	21.2132	0	0
1904	3.51013e+06	5.36613e+06	Reutlingen	0	3.3087	3	0.21978	0.19774	0.205882	0.215686	2235.7	483983	0.0103605	1.23563	1.5396	0.120979	1.29265	230.326	317.844	145	0	0
1905	3.55362e+06	5.3937e+06	Süßen	0	6.20514	3	0.166667	0.428571	0.333333	0.243243	944.5	3518.66	0.117923	1.2209	1.69688	0.108562	1.57604	611.494	176.139	150	0	0
1906	3.53864e+06	5.39058e+06	Ohmden	1	10.683	3	0.5	0.103448	0	0.148148	1484.6	584209	0.0130428	1.41308	2.06513	0.102155	1.23529	450.694	460.489	171.026	0	0
1907	3.49676e+06	5.36201e+06	Bodelshausen	0	2.60787	0	0.5	0.037037	0	0.25	0	97033.9	0.0257311	1.62158	2.06108	0.103155	1.18996	446.794	1158.84	156.605	0	0
1908	3.53935e+06	5.38493e+06	Weilheim an der Teck	1	7.31914	4	0.297297	0.193798	0.230769	0.204545	2903	1.55086e+06	0.00669018	1.28113	1.82018	0.108577	1.03917	1020.42	1061.38	205.548	1	0
1909	3.5488e+06	5.3993e+06	Göppingen	0	14.235	3	0.245902	0.57377	0.315789	0.36875	7691.2	71138.7	0.0307052	1.02208	1.4472	0.138668	1.15129	320.39	504.876	123.491	0	0
1910	3.54742e+06	5.3942e+06	Göppingen	0	9.68182	3	0.245902	0.57377	0.315789	0.36875	2980.5	261917	0.0182301	1.02208	1.4472	0.138668	1.15129	294.109	547.083	40.3113	0	0
1911	3.50354e+06	5.3609e+06	Mössingen	0	5.03183	3	0.304348	0.11465	0	0.151316	2017.3	395296	0.0136412	1.60177	2.13591	0.0976952	1.05316	750.6	1351.38	400.031	0	1
1912	3.52437e+06	5.37782e+06	Dettingen an der Erms	0	3.1579	3	0.230769	0.166667	1	0.159091	1374.8	2.35355e+06	0.00791344	1.25849	1.75538	0.113123	1.88725	455.412	199.249	199.249	0	0
1913	3.50576e+06	5.36219e+06	Mössingen	0	10.2357	3	0.304348	0.11465	0	0.151316	41107.2	1.71355e+06	0.0133141	1.60177	2.13591	0.0976952	1.05316	878.208	902.732	5	0	1
1914	3.52484e+06	5.37886e+06	Neuffen	0	11.0421	4	0.333333	0.326531	0.333333	0.222222	288338	2.35355e+06	0.00791344	1.28788	1.79529	0.111786	1.13303	275.545	458.939	316.623	1	0
1915	3.50755e+06	5.3633e+06	Mössingen	0	8.68295	4	0.304348	0.11465	0	0.151316	1214.1	402234	0.0211169	1.60177	2.13591	0.0976952	1.05316	576.975	586.451	68.0074	0	0
1916	3.54014e+06	5.38563e+06	Weilheim an der Teck	0	9.45613	3	0.297297	0.193798	0.230769	0.204545	1041.4	1.55086e+06	0.00669018	1.28113	1.82018	0.108577	1.03917	185.27	156.525	148.071	1	0
1917	3.53438e+06	5.38483e+06	Dettingen unter Teck	0	12.432	3	0.2	0.049296	0	0.107692	3550	2.05861e+06	0.00932867	1.37194	1.76895	0.12934	1.03196	1057	674.259	231.138	0	0
1918	3.53477e+06	5.39239e+06	Notzingen	1	5.11509	3	0.2	0.16	0	0.181818	1987.9	35047.8	0.0298994	1.58633	2.37363	0.106287	1.20792	318.944	520.096	295.677	0	0
1919	3.53912e+06	5.38296e+06	Weilheim an der Teck	1	18.0541	4	0.297297	0.193798	0.230769	0.204545	2574.6	1.48249e+06	0.00924149	1.28113	1.82018	0.108577	1.03917	311.488	368.917	306.757	0	0
1920	3.52707e+06	5.37916e+06	Neuffen	0	5.65692	3	0.333333	0.326531	0.333333	0.222222	12893.4	674506	0.0153244	1.28788	1.79529	0.111786	1.13303	330.341	653.242	191.05	0	0
1921	3.55221e+06	5.38984e+06	Schlat	1	14.9246	3	0.5	0.363636	0	0.361111	11461.2	27720	0.0421346	1.21365	1.90775	0.123203	1.17333	488.262	337.343	309.919	0	0
1922	3.51388e+06	5.37711e+06	Reutlingen	0	4.75259	2	0.21978	0.19774	0.205882	0.215686	2223.8	31407.3	0.0352592	1.23563	1.5396	0.120979	1.29265	42.4264	144.309	39.0512	0	0
1923	3.52014e+06	5.37148e+06	Eningen unter Achalm	0	17.4443	0	0.388889	0.6	0.4	0.392857	143178	538420	0.0157695	1.29455	1.67437	0.110704	1.02949	280.401	988.383	123.491	0	0
1924	3.53432e+06	5.39033e+06	Kirchheim unter Teck	0	7.06699	3	0.181818	0.241379	0.181818	0.245098	1604.4	30913.9	0.0236347	1.22208	1.69769	0.119627	1.30893	52.2015	166.433	75.1665	0	0
1925	3.50784e+06	5.37331e+06	Kusterdingen	0	2.26848	2	0.259259	0.168675	1	0.153226	1207	92062.8	0.0295451	1.39645	1.80254	0.10766	1.5061	150.416	246.272	20	0	0
1926	3.50367e+06	5.36492e+06	Ofterdingen	0	3.02047	3	0.363636	0.076923	1	0.142857	1670.2	239498	0.0229242	1.64931	2.09688	0.10547	0.946809	435	421.574	295.381	0	0
1927	3.52483e+06	5.37634e+06	Dettingen an der Erms	0	8.13568	3	0.230769	0.166667	1	0.159091	1452.1	1.10291e+06	0.0123476	1.25849	1.75538	0.113123	1.88725	388.104	245.815	40.3113	0	0
1928	3.53263e+06	5.39297e+06	Notzingen	0	11.2424	3	0.2	0.16	0	0.181818	991.6	227464	0.0161938	1.58633	2.37363	0.106287	1.20792	571.161	427.931	427.931	0	0
1929	3.52418e+06	5.37999e+06	Kohlberg	0	17.3927	3	0.25	0.076923	0	0.035714	2403.5	305005	0.0192568	1.33489	1.88101	0.109253	1.40323	194.165	67.2681	67.2681	0	0
1930	3.51784e+06	5.36854e+06	Pfullingen	0	13.8599	0	0.363636	0.576923	0.285714	0.567568	710.5	1.02441e+06	0.00879794	1.16265	1.70163	0.117938	1.10118	447.772	362.215	141.421	0	0
1931	3.54563e+06	5.38945e+06	Boll	1	13.0634	2	0.285714	2.5	1	0.538462	2327.2	68412.9	0.0244689	1.35042	1.91502	0.160651	1.21591	50	180.278	90	0	0
1932	3.53408e+06	5.39318e+06	Notzingen	0	5.52925	3	0.2	0.16	0	0.181818	1116.5	168973	0.0183377	1.58633	2.37363	0.106287	1.20792	115	380.789	164.012	0	0
1933	3.52427e+06	5.38039e+06	Kohlberg	0	8.33801	3	0.25	0.076923	0	0.035714	380.8	270170	0.0168053	1.33489	1.88101	0.109253	1.40323	183.371	244.182	215.058	0	0
1934	3.53549e+06	5.39083e+06	Kirchheim unter Teck	0	2.05328	3	0.181818	0.241379	0.181818	0.245098	1965.8	275546	0.0139559	1.22208	1.69769	0.119627	1.30893	337.676	498.523	245.815	0	0
1935	3.51717e+06	5.37374e+06	Reutlingen	1	8.09584	0	0.21978	0.19774	0.205882	0.215686	588.2	851648	0.00670136	1.23563	1.5396	0.120979	1.29265	0	319.766	22.3607	0	0
1936	3.52399e+06	5.38059e+06	Kohlberg	0	28.8244	3	0.25	0.076923	0	0.035714	1854	270170	0.0168053	1.33489	1.88101	0.109253	1.40323	469.521	310.161	86.3134	0	0
1937	3.52043e+06	5.37767e+06	Metzingen	1	12.2928	0	0.2	0.214953	0.428571	0.165138	1306.1	45104	0.0305062	1.18686	1.56641	0.121267	1.33648	0	268.701	43.0116	0	0
1938	3.52227e+06	5.38345e+06	Großbettlingen	0	8.32501	3	0.333333	0.222222	0	0.25	1567.3	109525	0.0177061	1.73035	2.47265	0.0858525	1.60976	235.213	299.666	82.0061	0	0
1939	3.52906e+06	5.39168e+06	Wendlingen am Neckar	0	2.73944	2	0.357143	0.071429	0.333333	0.375	949.1	403361	0.00978381	1.17744	1.7408	0.0861055	1.28011	515.461	601.103	56.5685	0	0
1940	3.51012e+06	5.36617e+06	Reutlingen	0	4.34657	0	0.21978	0.19774	0.205882	0.215686	3346.3	483983	0.0103605	1.23563	1.5396	0.120979	1.29265	199.812	285.044	148.071	0	0
1941	3.53387e+06	5.3849e+06	Dettingen unter Teck	0	14.7283	3	0.2	0.049296	0	0.107692	2524.5	2.05861e+06	0.00932867	1.37194	1.76895	0.12934	1.03196	801.28	552.11	497.845	0	0
1942	3.54774e+06	5.39372e+06	Heiningen	1	8.4396	3	0.185185	0.526316	1	0.348837	5035.3	14876.6	0.0500995	1.53551	2.04153	0.103488	1.07647	841.457	434.77	123.491	0	0
1943	3.53407e+06	5.39451e+06	Hochdorf	0	2.48579	3	0.052632	0.307692	1	0.129032	2722	195328	0.013884	1.34266	2.08222	0.0941176	1.33333	219.659	452.217	245.204	0	0
1944	3.50651e+06	5.36943e+06	Gomaringen	0	13.8991	3	0.25	0.196429	0.5	0.155172	2940.3	33861.5	0.0535116	1.48373	1.85863	0.0970857	1.08571	139.463	279.508	140.357	0	0
1945	3.51956e+06	5.37129e+06	Eningen unter Achalm	0	8.63466	3	0.388889	0.6	0.4	0.392857	3096.3	538420	0.0157695	1.29455	1.67437	0.110704	1.02949	275.409	713.32	30	0	0
1946	3.54701e+06	5.39335e+06	Heiningen	1	3.83658	3	0.185185	0.526316	1	0.348837	18958.8	103615	0.0409819	1.53551	2.04153	0.103488	1.07647	733.246	378.319	15.8114	0	0
1947	3.50273e+06	5.3666e+06	Dußlingen	0	2.93075	2	0.2	0.128205	0	0.090909	996.8	444598	0.020699	1.22642	1.77338	0.102978	0.989209	1100.84	1302.05	104.403	0	0
1948	3.53584e+06	5.38517e+06	Bissingen an der Teck	0	8.44997	3	0.333333	0.212766	0.5	0.254237	1297.7	1.06197e+06	0.0117425	1.35031	1.68719	0.114481	0.989418	263.154	450.694	141.421	0	1
1949	3.5587e+06	5.3888e+06	Kuchen	0	4.94991	3	0.333333	1	0	0.6	3332.4	1.18824e+06	0.0115027	1.02878	1.52941	0.11358	1.13072	15	350.892	85.5862	0	0
1950	3.54371e+06	5.39032e+06	Zell unter Aichelberg	0	19.3687	0	0.266667	0.291667	0	0.297297	2913.1	36443.3	0.0454609	2.1257	2.71429	0.101889	1.52475	362.25	824.924	193.003	0	0
1951	3.55821e+06	5.39207e+06	Gingen an der Fils	0	7.27525	3	0.25	0.588235	0	0.535714	23053.6	124436	0.0217808	1.1043	1.56275	0.127738	1.25	268.328	993	145	0	0
1952	3.51878e+06	5.37081e+06	Eningen unter Achalm	0	13.6562	3	0.388889	0.6	0.4	0.392857	1965.9	310933	0.0115632	1.29455	1.67437	0.110704	1.02949	56.5685	465.242	97.0824	0	0
1953	3.51595e+06	5.37003e+06	Pfullingen	0	11.5973	3	0.363636	0.576923	0.285714	0.567568	1097.4	898104	0.00809342	1.16265	1.70163	0.117938	1.10118	80.6226	455	78.2624	0	0
1954	3.54006e+06	5.38557e+06	Weilheim an der Teck	0	3.91364	3	0.297297	0.193798	0.230769	0.204545	271.9	1.55086e+06	0.00669018	1.28113	1.82018	0.108577	1.03917	252.24	250.45	65.192	1	0
1955	3.51718e+06	5.36871e+06	Pfullingen	0	5.05085	0	0.363636	0.576923	0.285714	0.567568	2937	1.02441e+06	0.00879794	1.16265	1.70163	0.117938	1.10118	30	115.109	96.1769	1	0
1956	3.53545e+06	5.3813e+06	Lenningen	0	14.5374	0	0.277778	0.221311	0	0.288288	0	1.54264e+06	0.0133674	1.09145	1.55231	0.106074	0.965142	628.351	1303.81	421.574	0	0
1957	3.50116e+06	5.36586e+06	Ofterdingen	0	2.91482	0	0.363636	0.076923	1	0.142857	0	908719	0.0134922	1.64931	2.09688	0.10547	0.946809	878.778	1236.25	209.881	0	0
1958	3.53543e+06	5.38478e+06	Bissingen an der Teck	0	9.57918	3	0.333333	0.212766	0.5	0.254237	5713.1	1.06197e+06	0.0117425	1.35031	1.68719	0.114481	0.989418	560.892	881.419	116.726	0	1
1959	3.51276e+06	5.37731e+06	Kirchentellinsfurt	0	3.4935	2	0	0	0	0	514.3	3165.18	0.0989948	1.28644	1.87016	0.107269	1.17308	284.121	38.0789	38.0789	0	0
1960	3.53044e+06	5.39187e+06	Wendlingen am Neckar	1	3.14768	2	0.357143	0.071429	0.333333	0.375	1200.3	12355.8	0.0618974	1.17744	1.7408	0.0861055	1.28011	53.1507	252.686	189.011	0	0
1961	3.51477e+06	5.36956e+06	Pfullingen	0	12.5717	0	0.363636	0.576923	0.285714	0.567568	727.1	174635	0.0115238	1.16265	1.70163	0.117938	1.10118	831.82	1233.88	26.9258	0	0
1962	3.51475e+06	5.37622e+06	Reutlingen	0	9.24472	3	0.21978	0.19774	0.205882	0.215686	17851	36188	0.0303716	1.23563	1.5396	0.120979	1.29265	41.2311	270.416	39.0512	0	0
1963	3.51755e+06	5.3738e+06	Reutlingen	0	18.2806	4	0.21978	0.19774	0.205882	0.215686	1912.9	851648	0.00670136	1.23563	1.5396	0.120979	1.29265	313.05	42.72	32.0156	0	0
1964	3.52252e+06	5.37798e+06	Metzingen	0	3.69258	2	0.2	0.214953	0.428571	0.165138	1316.7	2.35355e+06	0.00791344	1.18686	1.56641	0.121267	1.33648	124.197	548.566	10	0	0
1965	3.52936e+06	5.39284e+06	Wendlingen am Neckar	0	4.49847	2	0.357143	0.071429	0.333333	0.375	1269.1	16891.2	0.05418	1.17744	1.7408	0.0861055	1.28011	202.485	563.56	70	0	0
1966	3.52481e+06	5.37879e+06	Neuffen	0	16.6858	4	0.333333	0.326531	0.333333	0.222222	288338	2.35355e+06	0.00791344	1.28788	1.79529	0.111786	1.13303	240.052	406.602	275.409	1	0
1967	3.50562e+06	5.36538e+06	Nehren	0	3.34821	3	0	0	0	0	1465.2	1.29779e+06	0.0060432	1.69551	2.29424	0.103814	1.45652	127.475	387.621	190.919	0	0
1968	3.53999e+06	5.38494e+06	Weilheim an der Teck	0	10.611	3	0.297297	0.193798	0.230769	0.204545	1067.9	1.55086e+06	0.00669018	1.28113	1.82018	0.108577	1.03917	883.883	425.735	105.119	1	0
1969	3.54776e+06	5.39322e+06	Heiningen	0	0.275534	3	0.185185	0.526316	1	0.348837	14863.3	156470	0.0228275	1.53551	2.04153	0.103488	1.07647	844.038	341.248	72.8011	0	0
1970	3.55238e+06	5.3947e+06	Eislingen/ Fils	1	5.1924	2	0.225	0.75	0.6	0.395833	1149.1	111053	0.0270164	1.10179	1.50558	0.120292	1.10272	0	583.545	22.3607	0	0
1971	3.52699e+06	5.38191e+06	Frickenhausen	0	13.3864	4	0.125	0.076923	0.5	0.054054	2694.7	1.34387e+06	0.00860131	1.19047	1.7225	0.103565	1.05882	393.859	630.971	341.211	0	0
1972	3.5355e+06	5.38846e+06	Kirchheim unter Teck	1	7.11919	3	0.181818	0.241379	0.181818	0.245098	5326.8	260751	0.0226392	1.22208	1.69769	0.119627	1.30893	445.112	325	335	0	0
1973	3.51589e+06	5.37073e+06	Reutlingen	0	13.9607	0	0.21978	0.19774	0.205882	0.215686	1100.4	898104	0.00809342	1.23563	1.5396	0.120979	1.29265	135.831	430	29.1548	0	0
1974	3.51937e+06	5.37094e+06	Eningen unter Achalm	1	5.85157	3	0.388889	0.6	0.4	0.392857	2904.6	538420	0.0157695	1.29455	1.67437	0.110704	1.02949	209.404	733.655	80.6226	0	0
1975	3.51989e+06	5.3723e+06	Eningen unter Achalm	0	18.2645	3	0.388889	0.6	0.4	0.392857	1383.4	321504	0.0207117	1.29455	1.67437	0.110704	1.02949	131.244	280.401	29.1548	0	0
1976	3.50275e+06	5.36068e+06	Mössingen	0	15.8115	3	0.304348	0.11465	0	0.151316	174822	186364	0.0204816	1.60177	2.13591	0.0976952	1.05316	837.153	1264.54	40	0	1
1977	3.51074e+06	5.3661e+06	Reutlingen	0	7.90583	3	0.21978	0.19774	0.205882	0.215686	4339.6	483983	0.0103605	1.23563	1.5396	0.120979	1.29265	0	221.923	40	0	0
1978	3.50187e+06	5.36628e+06	Ofterdingen	0	1.78141	3	0.363636	0.076923	1	0.142857	561.6	908719	0.0134922	1.64931	2.09688	0.10547	0.946809	921.303	1526.8	20.6155	0	1
1979	3.51345e+06	5.37239e+06	Reutlingen	0	5.31601	0	0.21978	0.19774	0.205882	0.215686	1294.1	597842	0.0117804	1.23563	1.5396	0.120979	1.29265	168.003	472.784	40	0	0
1980	3.51584e+06	5.36801e+06	Pfullingen	0	7.97314	3	0.363636	0.576923	0.285714	0.567568	1745.1	520492	0.0100736	1.16265	1.70163	0.117938	1.10118	181.177	156.924	156.924	0	0
1981	3.51068e+06	5.37201e+06	Reutlingen	0	4.59731	3	0.21978	0.19774	0.205882	0.215686	1343.4	774234	0.0129779	1.23563	1.5396	0.120979	1.29265	156.525	296.015	109.772	0	0
1982	3.52842e+06	5.38926e+06	Oberboihingen	0	16.1561	0	0.285714	0.357143	0	0.444444	6262.2	43722.6	0.0273885	1.40177	1.84244	0.101036	1.11644	831.655	606.012	47.4342	0	0
1983	3.54994e+06	5.3921e+06	Eschenbach	0	2.4901	3	0.142857	0.583333	0	0.375	97031	103814	0.0160486	2.23722	2.98246	0.110795	1.37879	29.1548	25	25	0	0
1984	3.5323e+06	5.39204e+06	Kirchheim unter Teck	0	13.5353	3	0.181818	0.241379	0.181818	0.245098	3190.9	176278	0.0145955	1.22208	1.69769	0.119627	1.30893	372.156	20	20	0	0
1985	3.52758e+06	5.38441e+06	Nürtingen	0	17.5726	3	0.2	0.22314	0.315789	0.226277	384.2	1.08813e+06	0.00929233	1.36016	1.73962	0.12287	1.1157	393.573	956.151	215.87	0	0
1986	3.50725e+06	5.36277e+06	Mössingen	0	6.68133	3	0.304348	0.11465	0	0.151316	1132.8	402234	0.0211169	1.60177	2.13591	0.0976952	1.05316	1085.1	622.676	46.0977	0	1
1987	3.50688e+06	5.36741e+06	Gomaringen	0	4.96985	3	0.25	0.196429	0.5	0.155172	1203.5	276983	0.0102789	1.48373	1.85863	0.0970857	1.08571	218.002	730	102.956	0	0
1988	3.53271e+06	5.38682e+06	Dettingen unter Teck	0	14.6113	3	0.2	0.049296	0	0.107692	2054.6	1.70997e+06	0.00989906	1.37194	1.76895	0.12934	1.03196	125	930	109.772	0	0
1989	3.50207e+06	5.36398e+06	Ofterdingen	0	8.49488	3	0.363636	0.076923	1	0.142857	66.2	63683.6	0.0262974	1.64931	2.09688	0.10547	0.946809	179.513	348.174	142.127	0	0
1990	3.51305e+06	5.37258e+06	Reutlingen	0	6.53952	3	0.21978	0.19774	0.205882	0.215686	1946.1	168563	0.0189381	1.23563	1.5396	0.120979	1.29265	297.7	255.979	82.4621	0	0
1991	3.53505e+06	5.38215e+06	Lenningen	0	9.99074	3	0.277778	0.221311	0	0.288288	3084.2	1.54264e+06	0.0133674	1.09145	1.55231	0.106074	0.965142	732.564	1285.79	744.312	0	0
1992	3.5243e+06	5.37805e+06	Dettingen an der Erms	0	4.24145	3	0.230769	0.166667	1	0.159091	1287.6	2.35355e+06	0.00791344	1.25849	1.75538	0.113123	1.88725	519.23	232.433	232.433	0	0
1993	3.55666e+06	5.39313e+06	Süßen	1	2.08118	3	0.166667	0.428571	0.333333	0.243243	3469.2	243599	0.019395	1.2209	1.69688	0.108562	1.57604	79.0569	413.793	177.341	0	0
1994	3.51679e+06	5.37831e+06	Reutlingen	1	17.8947	3	0.21978	0.19774	0.205882	0.215686	6745.2	112750	0.0191347	1.23563	1.5396	0.120979	1.29265	118.849	276.089	150	0	0
1995	3.50609e+06	5.3628e+06	Mössingen	0	6.29779	3	0.304348	0.11465	0	0.151316	494.2	117554	0.0187532	1.60177	2.13591	0.0976952	1.05316	818.352	251.048	229.837	0	0
1996	3.53685e+06	5.38986e+06	Kirchheim unter Teck	0	13.5917	3	0.181818	0.241379	0.181818	0.245098	3570	329072	0.0147349	1.22208	1.69769	0.119627	1.30893	664.003	70	70	1	0
1997	3.55842e+06	5.39133e+06	Gingen an der Fils	0	17.6457	3	0.25	0.588235	0	0.535714	2269.4	482787	0.0230543	1.1043	1.56275	0.127738	1.25	70.7107	793.883	63.2456	0	0

## Sheet: municipality level
Municip. name	Loss rate (%)	Slope (°)	Soil quality	Change in no. of full-time farms (%)	Change in no. of part-time farms (%)	Change in no. of horticultural farms (%)	Change in no. of livestock farms (%)	Parcel size (ha)	Size of orchard meadow plot (ha)	Perimeter-area ratio of orchard meadow plot (m/m²)	Population change (%)	Change in no. of residential buildings (%)	Share of people ≥ 65 years among population (%)	Change in settlement and traffic area (%)	Distance to urban settlements (m)	Distance to main roads (m)	Distance to secondary roads (m)	Coverage of nature reserves (%)	Coverage of protected landscapes (%)
Aichelberg	66.7009	6.28439	3.01567	1	0.4	0	0.538462	2.74055	1.67595	0.0532562	1.88304	2.41667	76	1.55556	423.941	288.341	106.535	0.02	41.43
Albershausen	56.7028	6.3276	2.85826	0.214286	0.6	1	0.375	0.280748	1.37599	0.081418	1.36751	1.81129	342	1.18939	222.117	189.598	72.456	0	2.13
Altdorf	54.3164	5.11797	2.61625	0.6	0.04	0	0.142857	3.63288	1.81785	0.0544869	2.09142	2.66667	67	1.67647	474.81	280.472	97.808	0	25.96
Bad Überkingen	0.00499964	11.7624	3	0.153846	0.138889	0	0.172414	1.15691	0.0951469	0.05755	1.28323	1.96022	366	1.2766	321.015	82.1111	82.1111	0	0
Bempflingen	17.8924	8.20837	2.99453	0.333333	0.363636	1	0.272727	1.02308	4.14781	0.051324	1.26159	1.79849	267	1.38889	241.531	326.103	121.583	0	7.74
Beuren	14.626	8.1367	3.0761	0.076923	0.333333	0.333333	0.195652	0.158777	8.73543	0.0458347	1.14684	1.5569	339	1.02703	520.202	363.99	111.15	0	78.28
Bissingen an der Teck	21.6856	8.82165	3.15477	0.333333	0.212766	0.5	0.254237	19.3973	21.2436	0.025361	1.35031	1.68719	302	0.989418	554.599	752.07	156.216	11.69	43.57
Bodelshausen	26.3995	4.28209	3.03206	0.5	0.037037	0	0.25	0.11196	2.40474	0.0553953	1.62158	2.06108	376	1.18996	300.723	828.359	100.314	2.74	25.1
Boll	41.0624	7.4729	2.9545	0.285714	2.5	1	0.538462	0.756138	1.69399	0.0677458	1.35042	1.91502	592	1.21591	190.26	431.691	105.069	8.63	33.21
Dettingen an der Erms	9.84464	9.51776	2.9642	0.230769	0.166667	1	0.159091	1.64465	27.2228	0.0485118	1.25849	1.75538	837	1.88725	296.033	574.082	134.58	1.25	15.34
Dettingen unter Teck	8.68267	9.49187	3.04999	0.2	0.049296	0	0.107692	0.227833	14.3767	0.050152	1.37194	1.76895	529	1.03196	631.7	950.277	166.291	1.44	54.69
Donzdorf	47.3921	10.0003	3.11763	0.327273	0.537037	0	0.479592	5.93509	1.07482	0.0622648	1.1454	1.8843	1001	1.31707	313.16	987.202	90.7706	0	0.77
Dürnau	35.6362	6.01839	2.84364	0.461538	0.545455	1	0.5	0.575199	1.93282	0.0656135	1.42809	2.06038	135	1.47761	271.861	651.458	80.1849	0	31.19
Dußlingen	6.79757	4.08825	2.64324	0.2	0.128205	0	0.090909	0.145759	6.55317	0.05414	1.22642	1.77338	453	0.989209	906.959	1451.86	196.797	0	4.25
Ebersbach an der Fils	50.1193	7.51174	2.91135	0.288136	0.571429	0	0.370787	0.397508	1.86095	0.0600541	1.1282	1.82888	1391	1.14139	184.632	274.11	112.635	0	0.34
Eislingen/ Fils	42.2617	4.84164	2.73356	0.225	0.75	0.6	0.395833	0.418937	2.58525	0.0542513	1.10179	1.50558	2178	1.10272	290.356	268.429	81.3693	0	1.51
Eningen unter Achalm	16.5053	9.10534	3.04324	0.388889	0.6	0.4	0.392857	1.34332	11.8434	0.0388396	1.29455	1.67437	937	1.02949	290.223	580.48	84.5749	0.49	29.26
Eschenbach	24.2605	9.95786	2.9337	0.142857	0.583333	0	0.375	3.68731	1.5948	0.0328936	2.23722	2.98246	117	1.37879	454.598	834.913	93.7331	0	0
Frickenhausen	8.79313	10.4879	3.02056	0.125	0.076923	0.5	0.054054	2.44406	15.4881	0.0398989	1.19047	1.7225	764	1.05882	293.159	540.4	92.6181	0	31.28
Gammelshausen	34.8958	7.98203	2.91945	0.25	0.5	0	0.4375	0.561278	2.6569	0.044245	2.12843	2.98473	58	1.33333	125.131	223.838	69.2829	0	28.69
Geislingen an der Steige	21.7573	7.1253	3.10005	0.252174	0.616667	0.25	0.360248	0.400381	8.72416	0.020285	0.886321	1.27693	4154	1.04238	281.46	412.352	167.859	0	0
Gingen an der Fils	25.2255	8.91049	2.85114	0.25	0.588235	0	0.535714	4.58596	3.04101	0.0618065	1.1043	1.56275	519	1.25	407.943	539.084	230.774	0	0
Gomaringen	7.94097	6.29804	2.91092	0.25	0.196429	0.5	0.155172	0.185174	9.0382	0.0344037	1.48373	1.85863	563	1.08571	253.375	404.305	102.001	0	2.01
Göppingen	38.3808	7.84802	2.92765	0.245902	0.57377	0.315789	0.36875	0.64461	2.46434	0.0692879	1.02208	1.4472	7897	1.15129	194.088	274.096	85.4046	0	0.03
Grafenberg	22.0852	8.14476	3.00178	0	0.277778	0	0.235294	0.49896	5.10871	0.0340587	1.70392	2.09511	160	1.56897	188.011	495.133	109.662	0	1.18
Großbettlingen	55.586	7.52903	2.99039	0.333333	0.222222	0	0.25	0.802342	3.53586	0.0474314	1.73035	2.47265	213	1.60976	61.4359	183.308	54.5846	0	27.49
Hattenhofen	43.0023	4.21438	2.65518	0.1	0.55	0	0.342105	0.877228	1.9721	0.0698213	1.84567	2.32571	190	1.25893	228.462	362.919	155.617	0	8.36
Hechingen	44.5592	5.7216		0.236842	0.175	0	0.220126	0.309743	2.43236	0.049862	1.18938	1.61633	2087	1.31471	114.493	278.019	103.607	6.31	27.78
Heiningen	45.9862	7.38354	2.9983	0.185185	0.526316	1	0.348837	0.891798	1.89166	0.0669027	1.53551	2.04153	356	1.07647	490.367	494.841	95.8813	0	0.02
Hochdorf	48.4681	7.60968	2.80685	0.052632	0.307692	1	0.129032	0.96724	9.27093	0.0397711	1.34266	2.08222	344	1.33333	227.753	578.831	81.6227	0	44.67
Holzmaden	40.049	5.28828	2.94283	1	0.166667	0	0.235294	0.245066	5.16398	0.0311929	1.40334	1.87306	181	1.13889	181.487	227.27	148.194	0.81	35.84
Kirchentellinsfurt	65.6098	6.22136	2.33937	0	0	0	0	0.150976	0.855168	0.0851084	1.28644	1.87016	456	1.17308	105.731	113.464	45.6406	0	0
Kirchheim unter Teck	45.2472	7.12423	3.01247	0.181818	0.241379	0.181818	0.245098	0.847812	4.99361	0.0480935	1.22208	1.69769	3910	1.30893	308.295	319.715	108.502	3.23	18.11
Kohlberg	11.0845	10.4861	3.04297	0.25	0.076923	0	0.035714	0.137666	21.2023	0.0312667	1.33489	1.88101	196	1.40323	202.866	291.211	136.875	0.41	69.66
Kuchen	17.295	11.1985	3.00966	0.333333	1	0	0.6	0.408048	18.1403	0.05076	1.02878	1.52941	598	1.13072	276.656	663.816	114.062	0	0
Kusterdingen	15.3979	4.55956	1.95345	0.259259	0.168675	1	0.153226	0.231921	1.51116	0.0656519	1.39645	1.80254	610	1.5061	278.686	450.736	125.216	0	15.26
Lenningen	9.24749	11.168	3.02519	0.277778	0.221311	0	0.288288	0.144967	36.5093	0.0233467	1.09145	1.55231	819	0.965142	262.277	536.66	223.129	1.89	63.98
Metzingen	10.6762	8.65145	2.92823	0.2	0.214953	0.428571	0.165138	0.8194	7.68274	0.0474577	1.18686	1.56641	2290	1.33648	472.391	402.105	98.1554	0	14.29
Mössingen	12.5732	8.1904	3.18534	0.304348	0.11465	0	0.151316	4.22647	10.2596	0.0539455	1.60177	2.13591	1225	1.05316	550.261	762.315	131.835	2.4	36.29
Neckartenzlingen	27.4275	9.14553	2.77024	0	0.1	1	0.266667	0.291175	7.9815	0.0244575	1.30354	1.90761	439	1.23404	226.793	278.735	128.682	0	45.74
Nehren	10.351	7.17681	3.0079	0	0	0	0	0.154924	12.6867	0.042027	1.69551	2.29424	264	1.45652	317.748	472.879	114.68	0	10.77
Neidlingen	4.12289	12.7322	3.22295	0.2	0.157143	1	0.114286	0.543719	14.6292	0.0404708	1.31936	1.78261	150	0.909091	308.431	480.938	140.449	1.86	77.48
Neuffen	5.31034	8.45924	3.02062	0.333333	0.326531	0.333333	0.222222	0.159373	19.4485	0.032341	1.28788	1.79529	552	1.13303	420.831	541.039	153.736	0.29	74.68
Notzingen	31.1872	7.45695	2.97041	0.2	0.16	0	0.181818	1.48221	4.12568	0.0528779	1.58633	2.37363	235	1.20792	286.886	324.841	180.871	0	40.77
Nürtingen	35.2567	7.64784	2.88721	0.2	0.22314	0.315789	0.226277	1.33615	4.22018	0.0496612	1.36016	1.73962	3706	1.1157	224.158	420.298	113.746	0	24.44
Oberboihingen	11.5425	10.7138	3.05123	0.285714	0.357143	0	0.444444	3.55429	2.32314	0.0417057	1.40177	1.84244	390	1.11644	603.696	438.665	227.518	0	26.08
Ofterdingen	7.21974	5.1896	2.8388	0.363636	0.076923	1	0.142857	0.123555	4.29062	0.0667614	1.64931	2.09688	295	0.946809	485.775	782.575	156.069	0	16.39
Ohmden	33.3298	7.40064	2.9565	0.5	0.103448	0	0.148148	0.317474	10.4458	0.061523	1.41308	2.06513	128	1.23529	239.312	304.214	138.3	4.09	35.93
Owen	8.72386	9.20666	3.01229	0.133333	0.47619	1	0.354167	2.10435	22.7174	0.0316782	1.31243	1.74632	319	1.05	401.692	381.395	130.228	4.29	68.33
Pfullingen	21.0099	9.361	3.132	0.363636	0.576923	0.285714	0.567568	0.237492	11.2912	0.0533561	1.16265	1.70163	1881	1.10118	256.793	404.485	81.814	3.16	5.3
Rechberghausen	42.5876	5.00797	2.8238	0.454545	0.5	0	0.545455	0.249698	0.764245	0.0705384	1.17103	1.82626	518	1.18	160.403	168.406	66.4485	0	0
Reutlingen	26.408	7.80387	2.85564	0.21978	0.19774	0.205882	0.215686	0.923898	6.18772	0.0520583	1.23563	1.5396	11229	1.29265	217.168	363.064	69.9464	1.68	1.24
Riederich	24.3415	7.06245	2.82698	0	0	0	0	0.21505	5.9798	0.0407342	1.66874	2.11765	274	1.31193	178.029	333.3	75.7405	0	0.03
Schlat	42.0565	7.90774	3.0124	0.5	0.363636	0	0.361111	0.745935	2.62984	0.0590167	1.21365	1.90775	180	1.17333	333.497	513.641	126.699	0	0
Schlierbach	33.0248	4.77759	2.85024	0	0.333333	0	0.166667	0.240363	6.35989	0.0343882	1.39391	2.01306	246	1.14667	693.263	526.16	121.74	0	3.74
Süßen	33.7811	4.65321	2.90155	0.166667	0.428571	0.333333	0.243243	1.06256	1.70881	0.0614561	1.2209	1.69688	899	1.57604	446.807	365.928	134.891	0	0
Tübingen	0.05605	1.7572		0.306452	0.239437	0.458333	0.212903	0.124206	0.00127476	0.01471	1.29201	1.55588	6870	1.04779	1223.42	1716.04	133.065	0	0
Uhingen	56.7291	6.78172	2.91288	0.380952	0.264706	0.8	0.318841	0.457845	1.0154	0.0678318	1.16457	1.74023	1234	1.14191	145.29	306.719	77.4324	0	0
Wangen	14.7672	5.39746	2.89054	0.136364	0.277778	0	0.230769	0.634693	1.09179	0.0666517	1.16083	1.83166	310	1.1783	218.985	240.408	56.2194	0	0
Wannweil	21.2064	8.38668	2.84888	0.5	0.2	0.2	0.166667	0.276391	3.77149	0.0376646	1.10228	1.56674	566	1.42478	212.642	407.293	70.9049	0	6.61
Weilheim an der Teck	22.0447	9.20478	3.15087	0.297297	0.193798	0.230769	0.204545	1.31433	13.2528	0.0471859	1.28113	1.82018	814	1.03917	396.254	497.624	132.377	8.58	48.7
Wendlingen am Neckar	30.0289	4.88912	2.28291	0.357143	0.071429	0.333333	0.375	1.15673	3.78585	0.043578	1.17744	1.7408	1201	1.28011	466.65	674.342	71.9005	0	25.55
Wernau (Neckar)	21.1977	10.563	3.07176	0.285714	0.214286	0	0.384615	0.374866	2.91772	0.0444473	0.987809	1.53707	1047	1.16606	344.398	505.086	106.85	1.02	17.76
Zell unter Aichelberg	56.1123	5.11448	2.73681	0.266667	0.291667	0	0.297297	0.886955	2.06911	0.07082	2.1257	2.71429	151	1.52475	173.83	292.447	67.812	0	8.88
